# Supplementary material
Source: PubMed Central journal article supplement (PMC3395776)
Supplement: NIHMS389141-supplement-1_si_001.pdf [file NIHMS389141-supplement-1_si_001.pdf]

## Supporting Information

The anticancer activity and cellular repression of c-MYC by the G-quadruplex-stabilizing 11-piperazinyl quindoline is not dependent on direct targeting of the G-quadruplex in the c-MYC promoter

Peda V. L. Boddupally,<sup>1</sup> Seongmin Hahn,<sup>1</sup> Cristina Beman,<sup>1</sup> Biswanath De,<sup>1</sup>

Tracy A. Brooks,<sup>1-3</sup> Vijay Gokhale,<sup>1-3</sup> Laurence H. Hurley<sup>1-3\*</sup>

**Spectral data (<sup>1</sup>H/<sup>13</sup>C-NMR, HRMS, and HPLC) for compounds 2–16.**

- 10.914
- 8.370
- 8.344
- 8.311
- 8.286
- 8.214
- 8.183
- 8.155
- 8.127
- 7.724
- 7.704
- 7.658
- 7.632
- 7.621
- 7.608
- 7.598
- 7.569
- 7.545
- 7.523
- 7.280
- 7.258
- 7.233
- 3.430
- 3.079
- 2.826
- 2.756
- 2.571
- 2.508
- 2.504
- 0.004
- 0.016

Compound 2

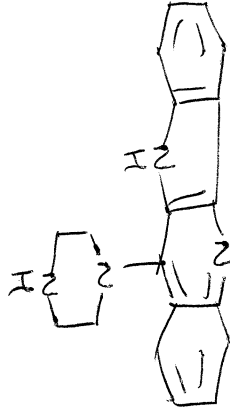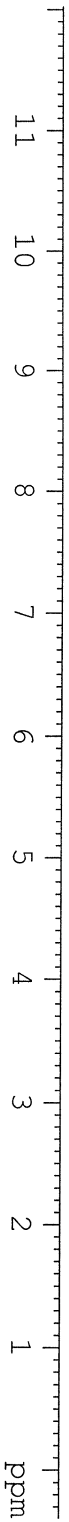

1.000

2.168

1.172

4.422

1.160

3.835

3.887

1.190

Current Data Parameters  
 NAME VB-GSA-Piperazine  
 EXPNO 9  
 PROCNO 3

F2 - Acquisition Parameters

Date\_ 20090203  
 Time\_ 11.39  
 INSTRUM spect  
 PROBHD 5 mm QNP 1H/1  
 PULPROG zg30  
 TD 65536  
 SOLVENT DMSO  
 NS 16  
 DS 2  
 SWH 6172.839 Hz  
 FIDRES 0.094190 Hz  
 AQ 5.3084660 sec  
 RG 574.7  
 DW 81.000 usec  
 DE 6.00 usec  
 TE 300.0 K  
 D1 1.00000000 sec

==== CHANNEL f1 =====

NUC1 1H  
 P1 9.25 usec  
 PL1 0.00 dB  
 SF01 300.1318534 MHz

F2 - Processing parameters

SI 32768  
 SF 300.1300000 MHz  
 WDW EM  
 SSB 0  
 LB 0.30 Hz  
 GB 0  
 PC 1.00

- 161.685
- 148.146
- 145.874
- 144.789
- 136.705
- 130.325
- 129.971
- 127.234
- 127.010
- 125.121
- 124.213
- 122.122
- 121.946
- 120.213
- 112.896

- 51.252
- 46.776
- 46.493
- 46.230
- 45.616
- 41.180
- 40.902
- 40.624
- 40.346
- 40.067
- 39.789
- 39.511

Compound 2

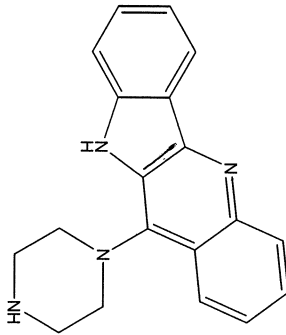

Current Data Parameters  
 NAME VB\_PZ  
 EXPNO 1  
 PROCNO 1

F2 - Acquisition Parameters

Date\_ 20080505  
 Time 9.41  
 INSTRUM spect  
 PROBHD 5 mm QNP 1H/1  
 PULPROG zgpg30  
 TD 65536  
 SOLVENT ~~CDCl3~~ DMF-d5  
 NS 13312  
 DS 4  
 SMH 17985.611 Hz  
 FIDRES 0.274439 Hz  
 AQ 1.8219508 sec  
 RG 2298.8  
 DW 27.800 usec  
 DE 6.00 usec  
 TE 300.0 K  
 D1 2.00000000 sec  
 d11 0.03000000 sec  
 d12 0.00002000 sec

CHANNEL F1

NUC1 13C  
 P1 6.00 usec  
 PL1 2.00 dB  
 SFO1 75.4752653 MHz

CHANNEL F2

CPDPRG2 waltz16  
 NUC2 1H  
 PCPD2 90.00 usec  
 PL2 0.00 dB  
 PL12 20.00 dB  
 PL13 20.00 dB  
 SFO2 300.1312005 MHz

F2 - Processing parameters

SI 32768  
 SF 75.4677190 MHz  
 WDW EM  
 SSB 0  
 LB 1.00 Hz  
 GB 0  
 PC 1.00

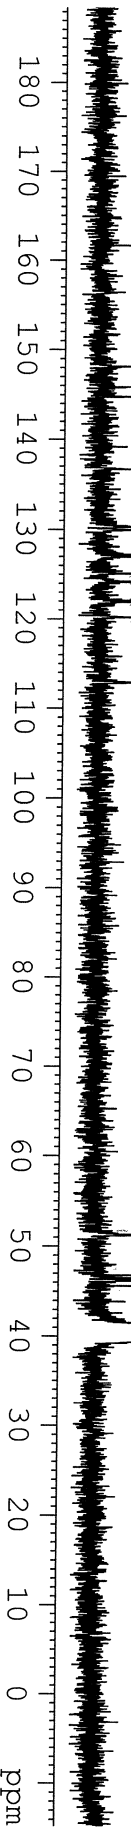

=====  
Injection Date : 4/30/08 7:30:22 PM  
Sample Name : VB-pz Vial : 4  
Acq. Operator : Karen Inj : 1  
Inj Volume : 0.1 µl  
Method : D:\HPCHEM\1\METHODS\SCOTT\_C.M  
Last changed : 4/30/08 7:45:44 PM by Karen  
(modified after loading)

Zorbax C18 SB column, 3.5µ, 4.6 x 150mm, mp=30/70/0175, MeOH:water:formic A; scan 150-500;  
flow 0.5mL/min; vcap 2500, frag 100; col temp 40 0.175  
=====

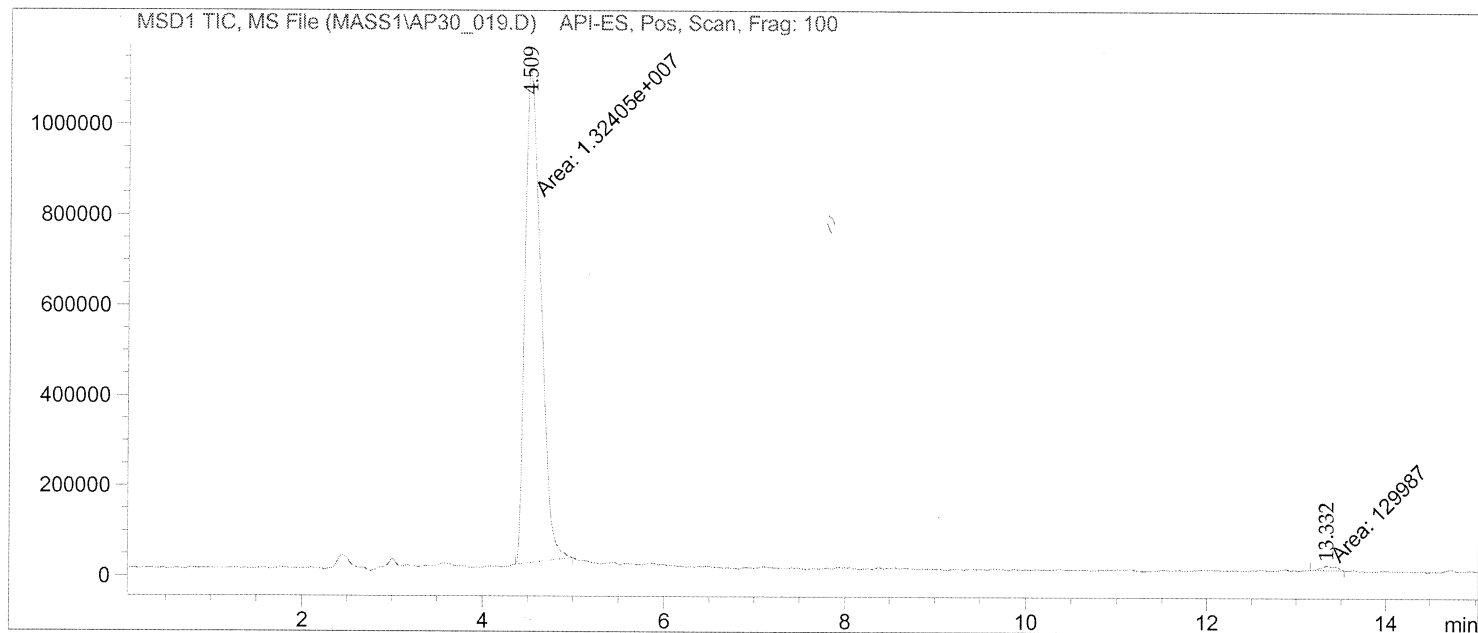

=====  
Area Percent Report  
=====

Sorted By : Retention Time  
Calib. Data Modified : Tuesday, November 27, 2007 2:17:56 PM  
Multiplier : 1.0000  
Dilution : 1.0000

Signal 1: MSD1 TIC, MS File

| Peak # | RetTime [min] | Sig | Type | Area      | Area %  | Name |
|--------|---------------|-----|------|-----------|---------|------|
| 1      | 4.509         | 1   | MM   | 1.32405e7 | 99.0278 | ? ✓  |
| 2      | 13.332        | 1   | MM   | 1.29987e5 | 0.9722  |      |

Totals : 1.33705e7

1 Warnings or Errors :

Warning : Calibration warnings (see calibration table listing)

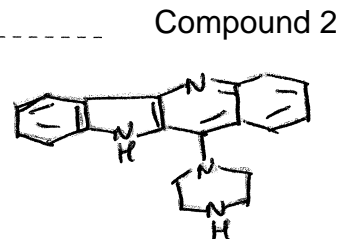

=====  
\*\*\* End of Report \*\*\*

=====  
Injection Date : 4/30/08 7:30:22 PM  
Sample Name : VB-pz  
Acq. Operator : Karen  
Vial : 4  
Inj : 1  
Inj Volume : 0.1 µl  
Method : D:\HPCHEM\1\METHODS\SCOTT\_C.M  
Last changed : 4/30/08 7:45:44 PM by Karen  
(modified after loading)  
Zorbax C18 SB column, 3.5µ, 4.6 x 150mm, mp=30/70/0175, MeOH:water:formic A; scan 150-500; flow 0.5mL/min; vcap 2500, frag 100; col temp 40

Current Chromatogram(s)

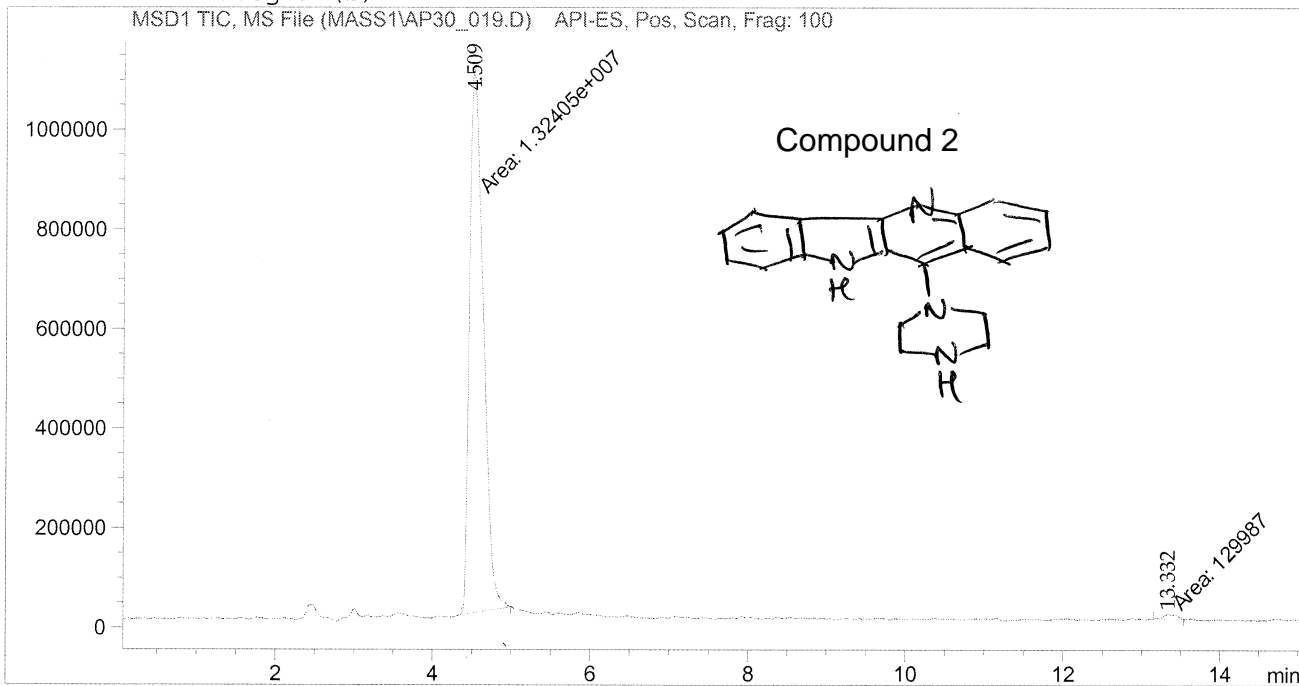

MS Spectrum

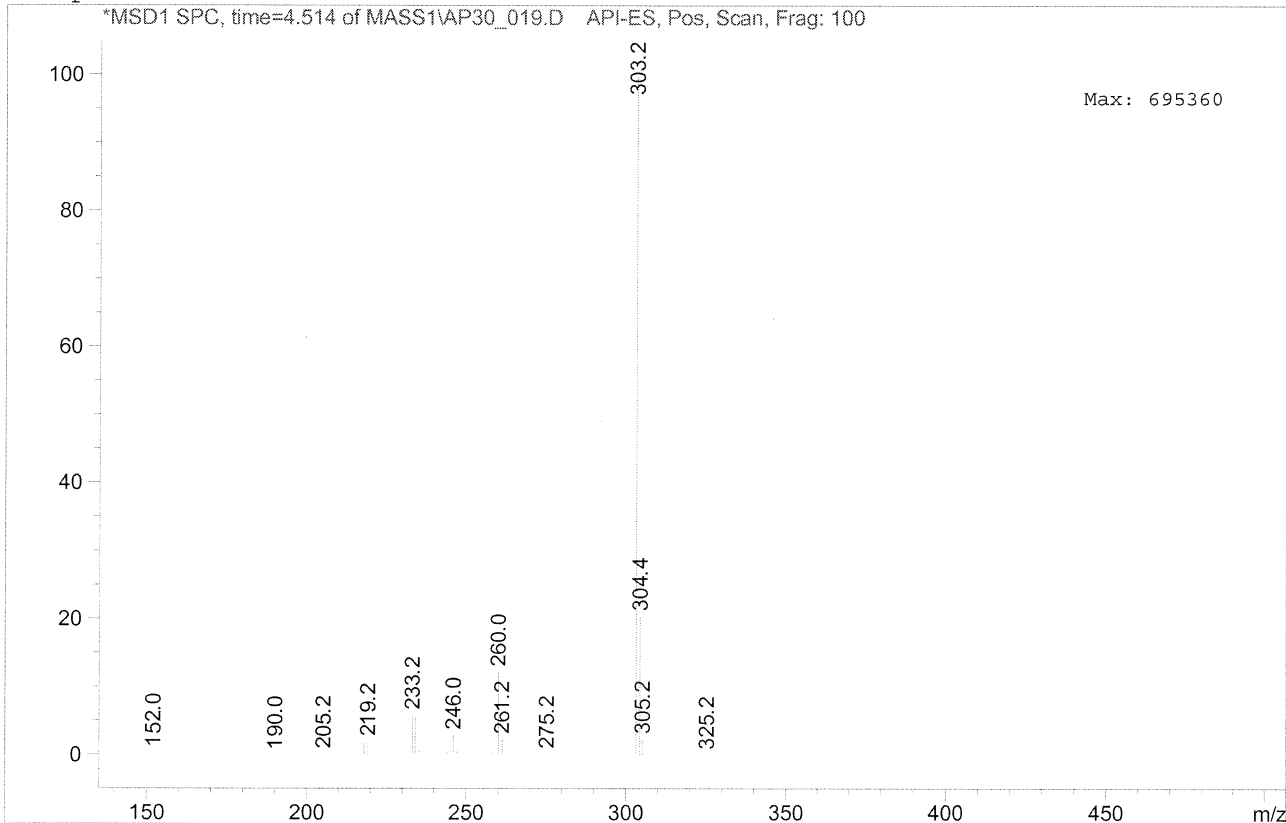

## Generic Display Report

## Analysis Info

Analysis Name D:\DATA\Facility\_April\_08\VB-PZ\_000002.d  
Method ESI\_101506  
Sample Name VB-PZ  
Comment Venkat Boddupally  
VB-PZ in MeOH:ACN

Acquisition Date 5/2/2008 2:25:45 PM

Operator Administrator  
Instrument apex-Qe

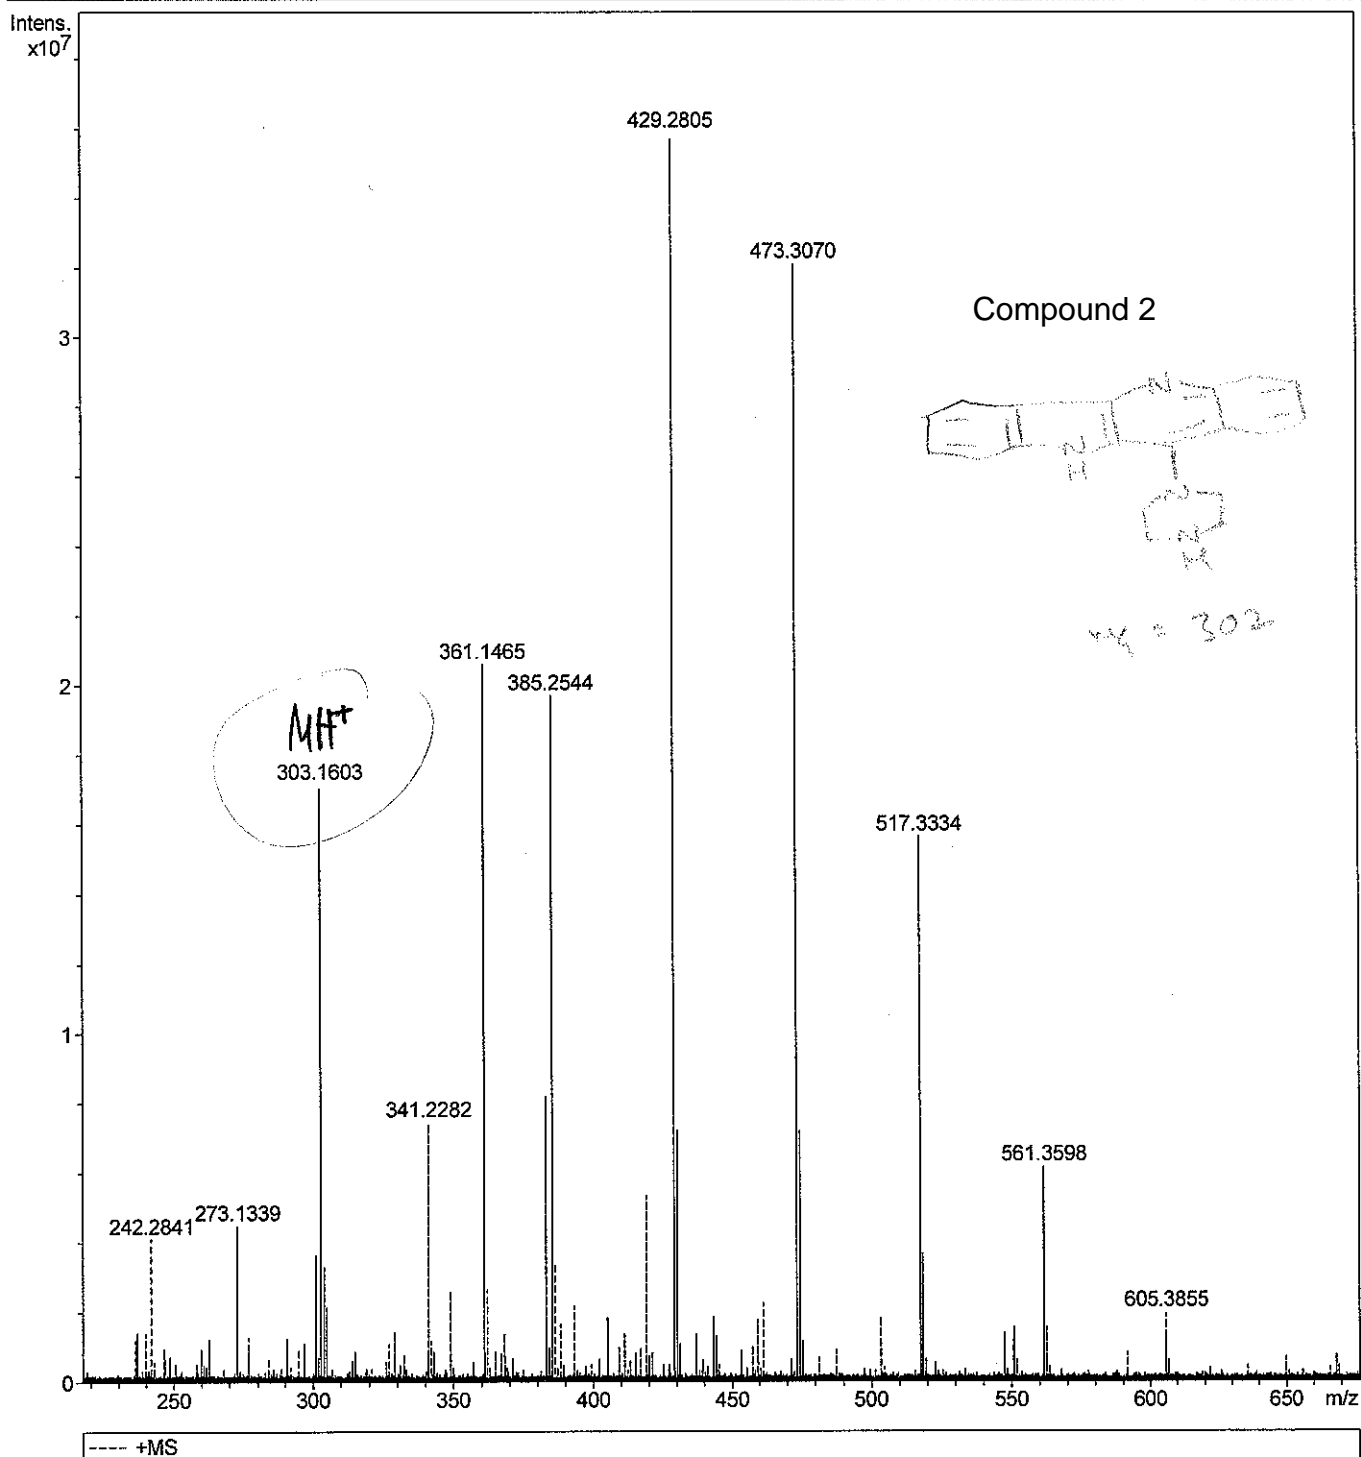

VB-PZ #40-43 RT: 1.43-1.53 AV: 4 NL: 1.39E7  
T: + p Full ms [150.00-2000.00]  
303.4

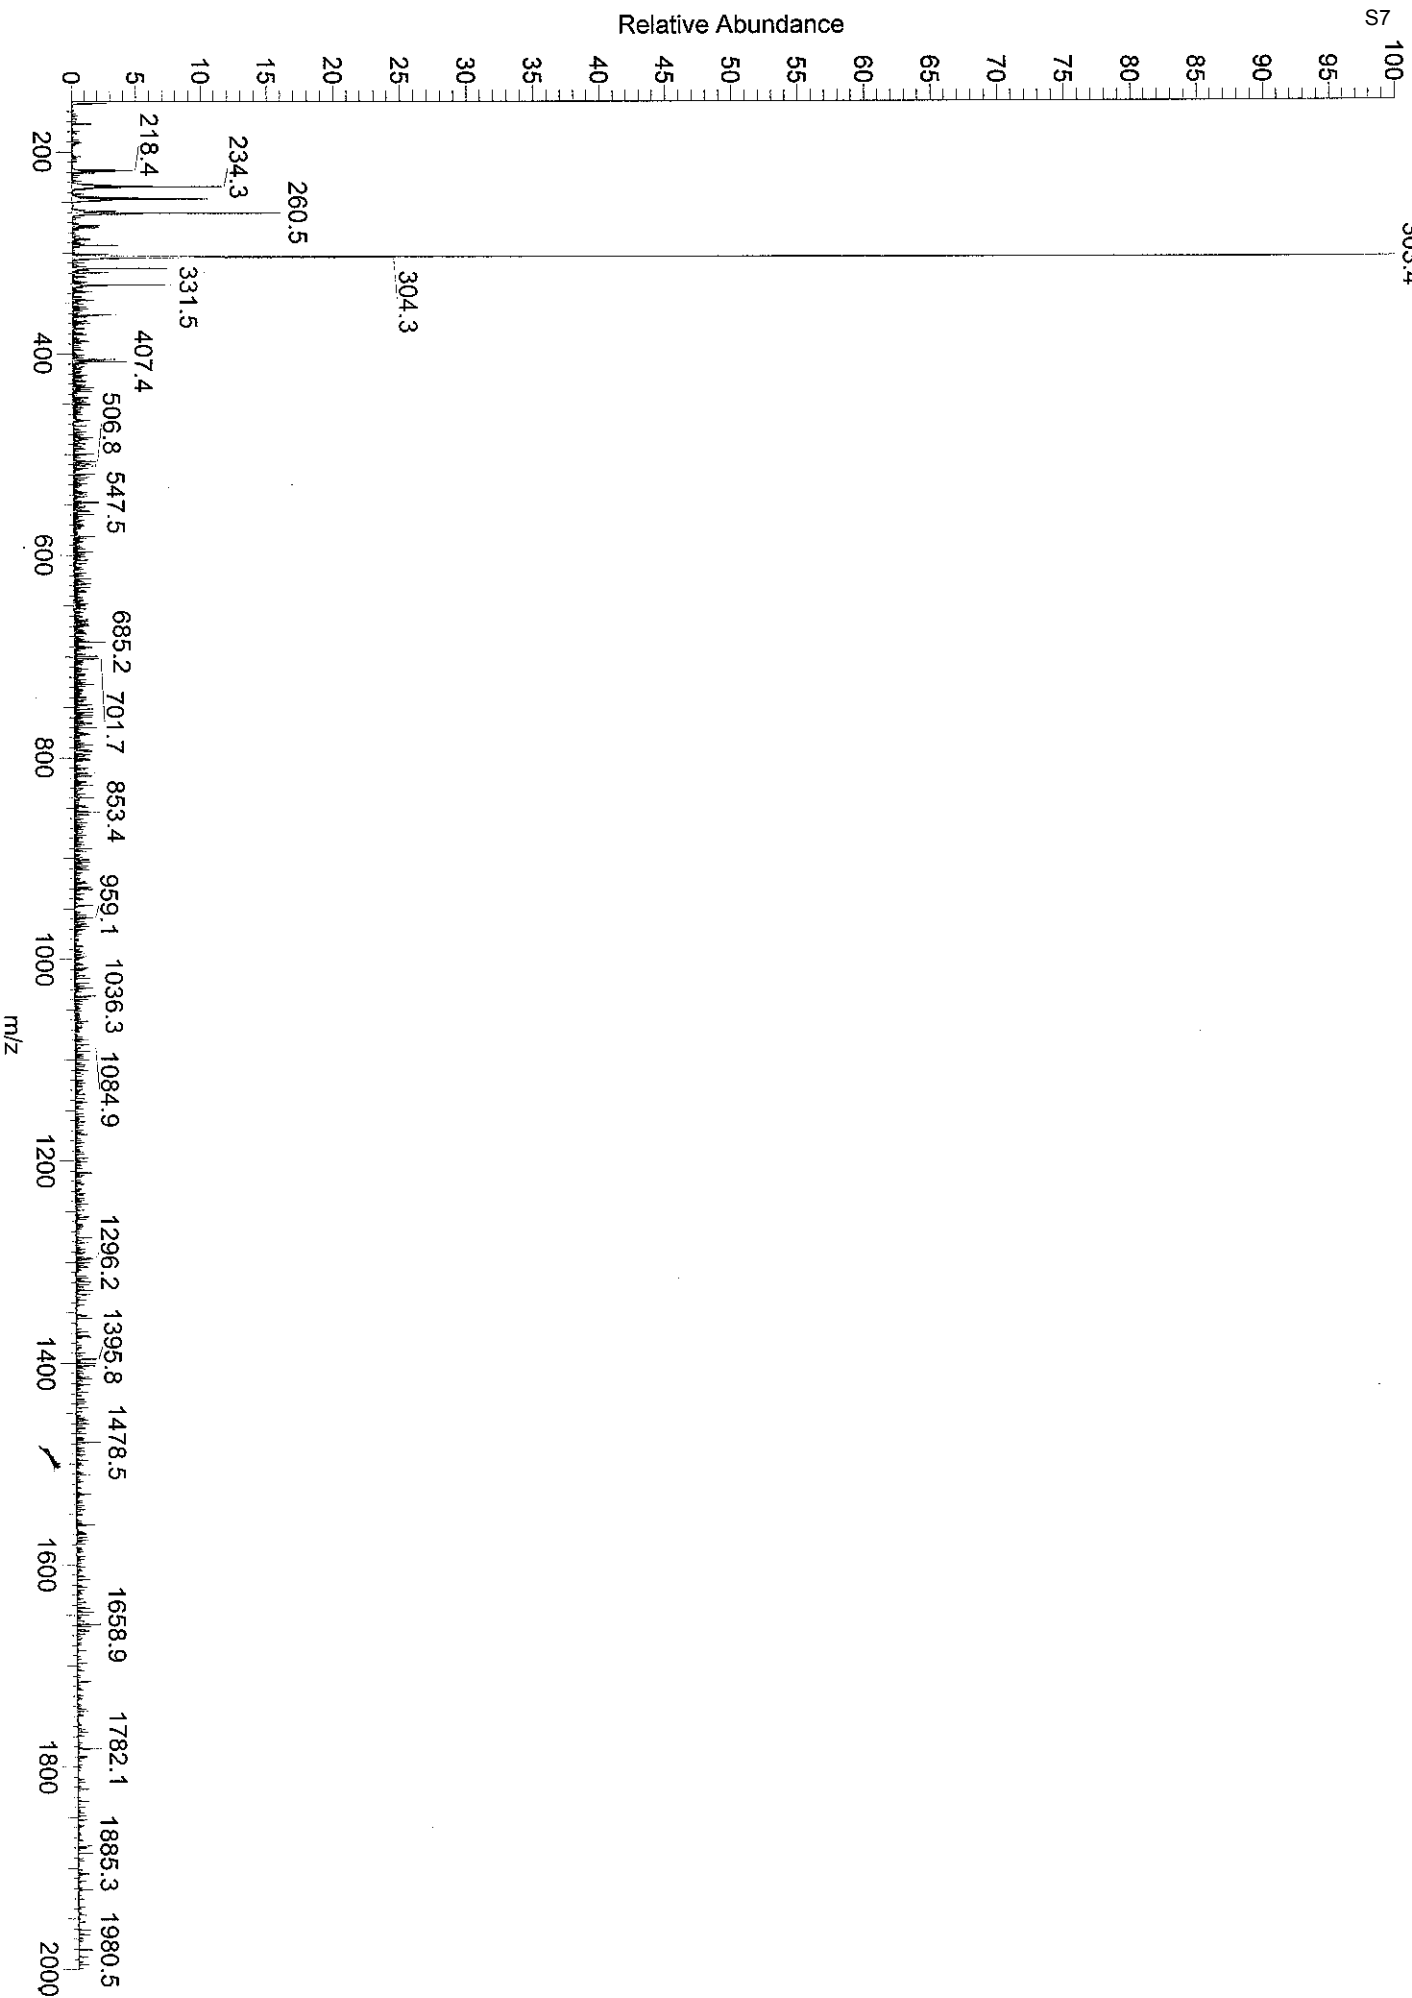

C:\Xcalibur\data\Facility Data\VB-PZ  
Venkat B, MeOH:ACN  
VB-PZ #40-43 RT: 1.43-1.53 AV: 4 NL: 1.39E7  
T: + p Full ms [150.00-2000.00]

05/02/2008 09:38:26 AM

VB-PZ

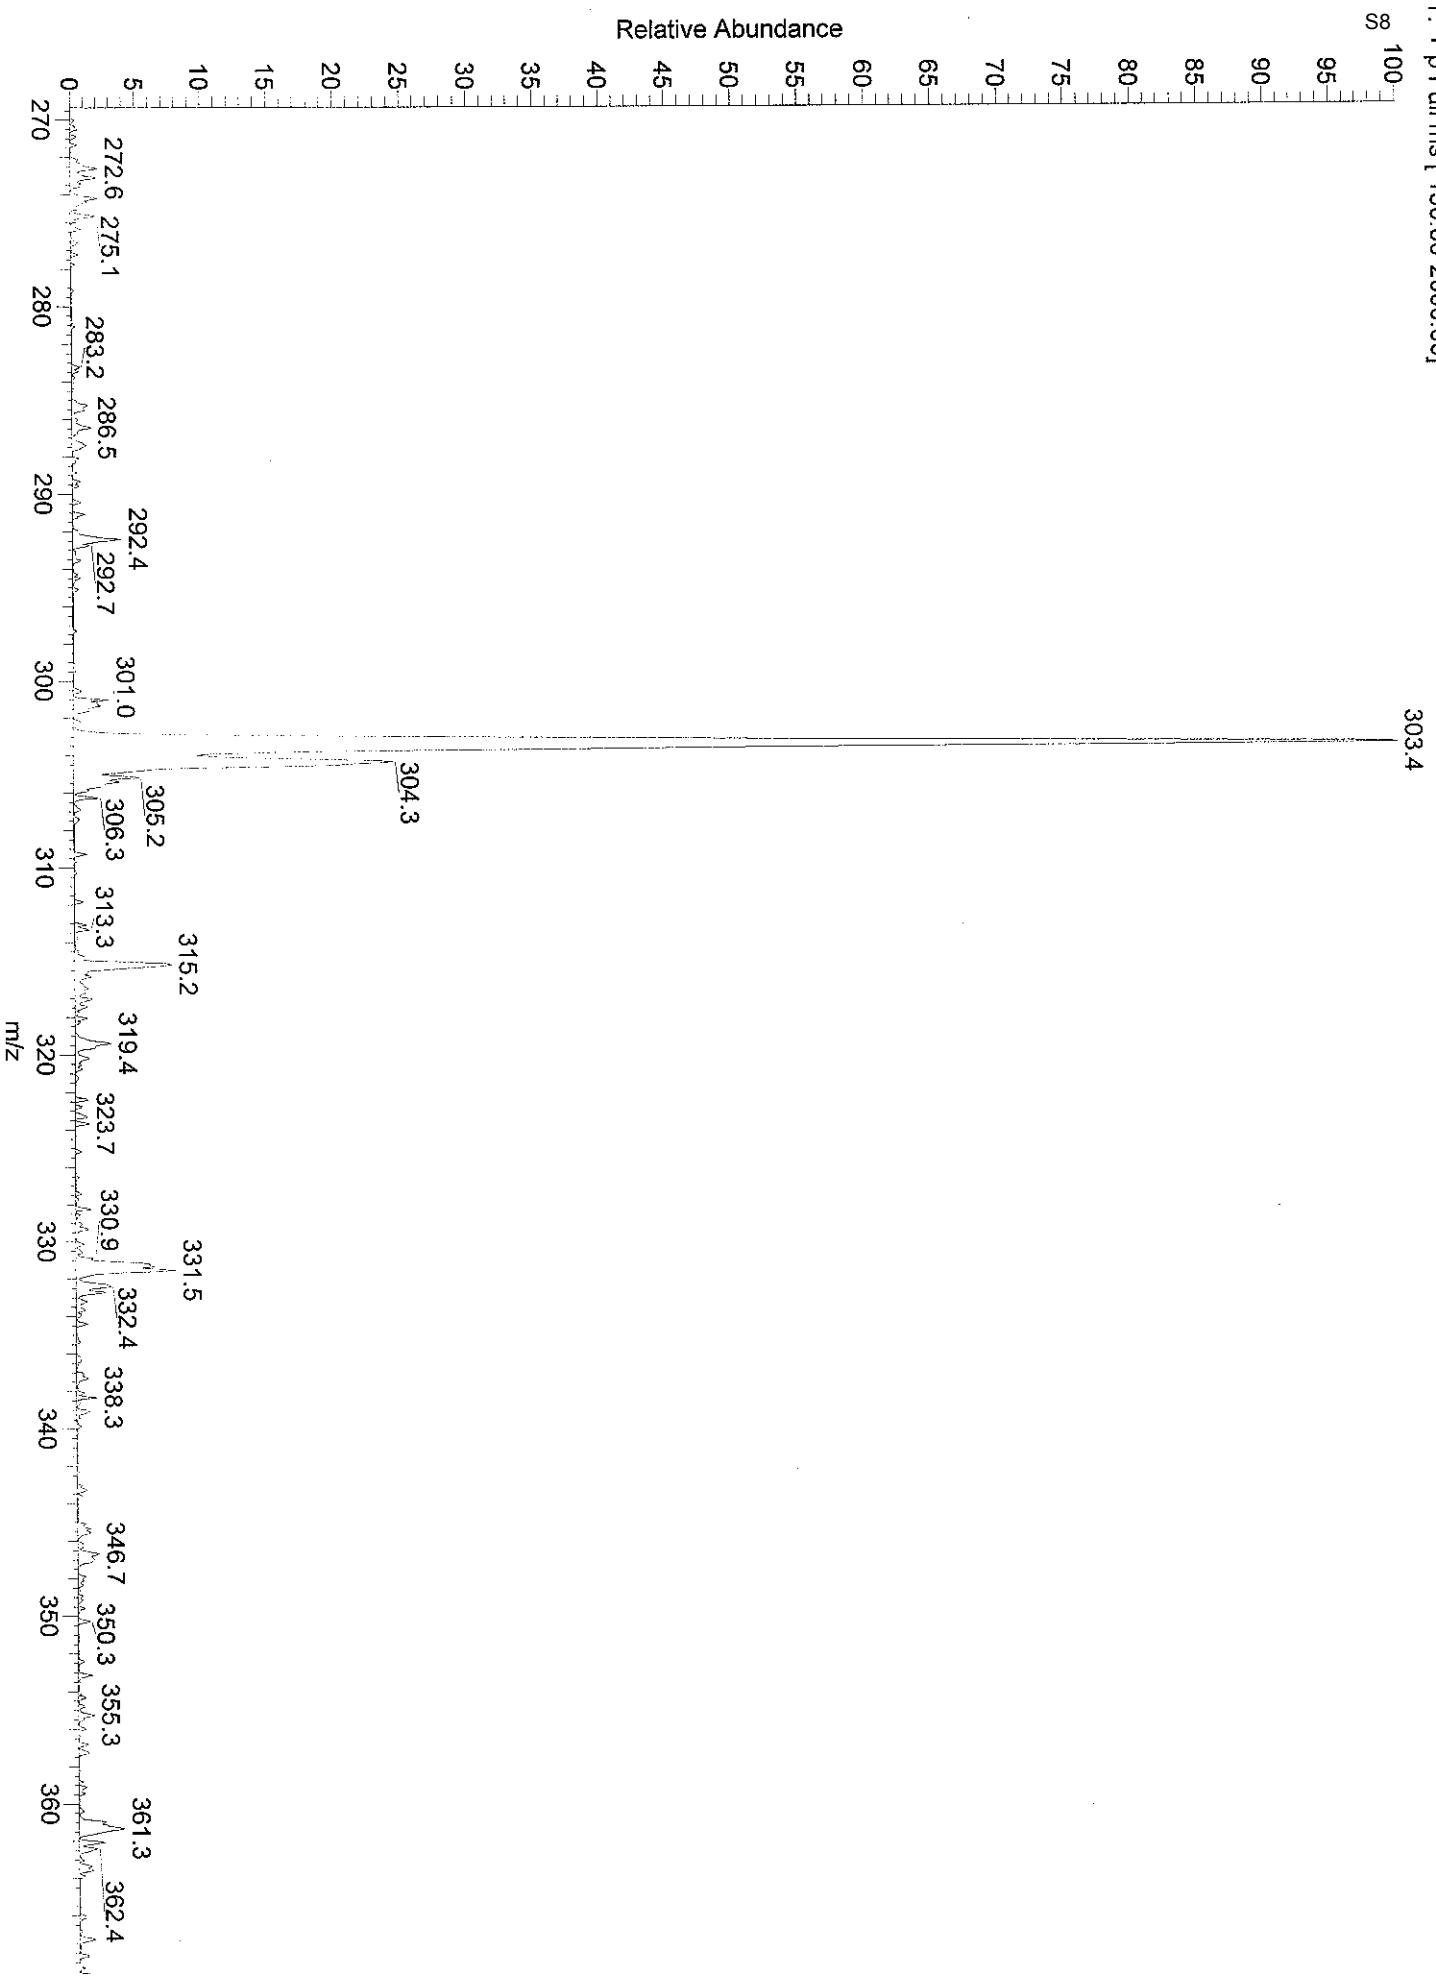



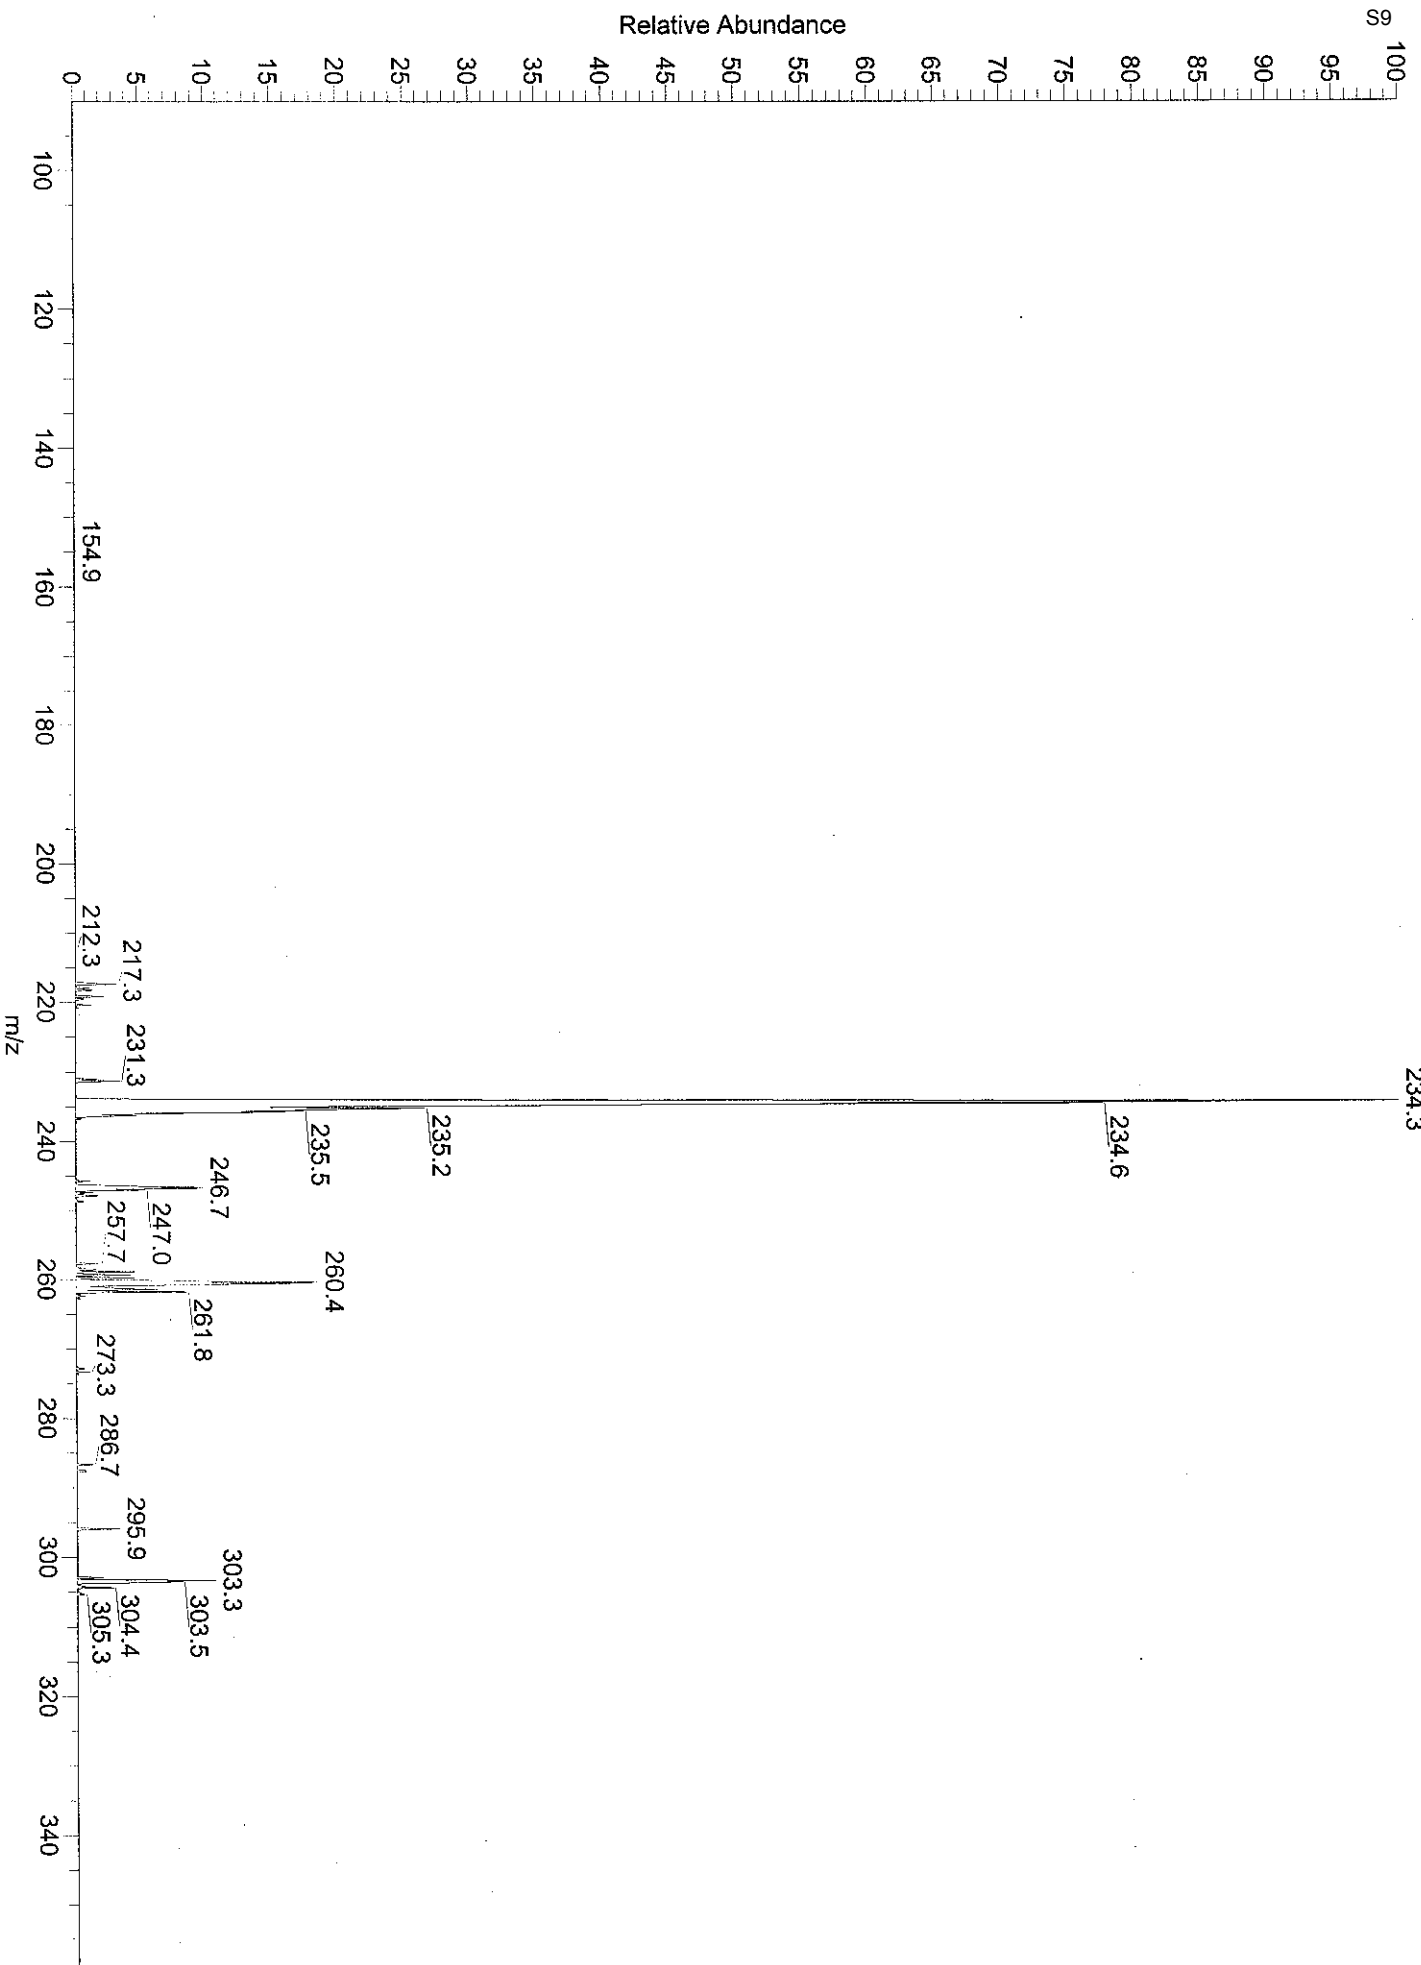

## Generic Display Report

## Analysis Info

Analysis Name D:\DATA\Facility\_April\_08\VB-PZ\_000002.d  
Method ESI\_101506  
Sample Name VB-PZ  
Comment Venkat Boddupally  
VB-PZ in MeOH:ACN

Acquisition Date 5/2/2008 2:25:45 PM

Operator Administrator  
Instrument apex-Qe

Compound 2

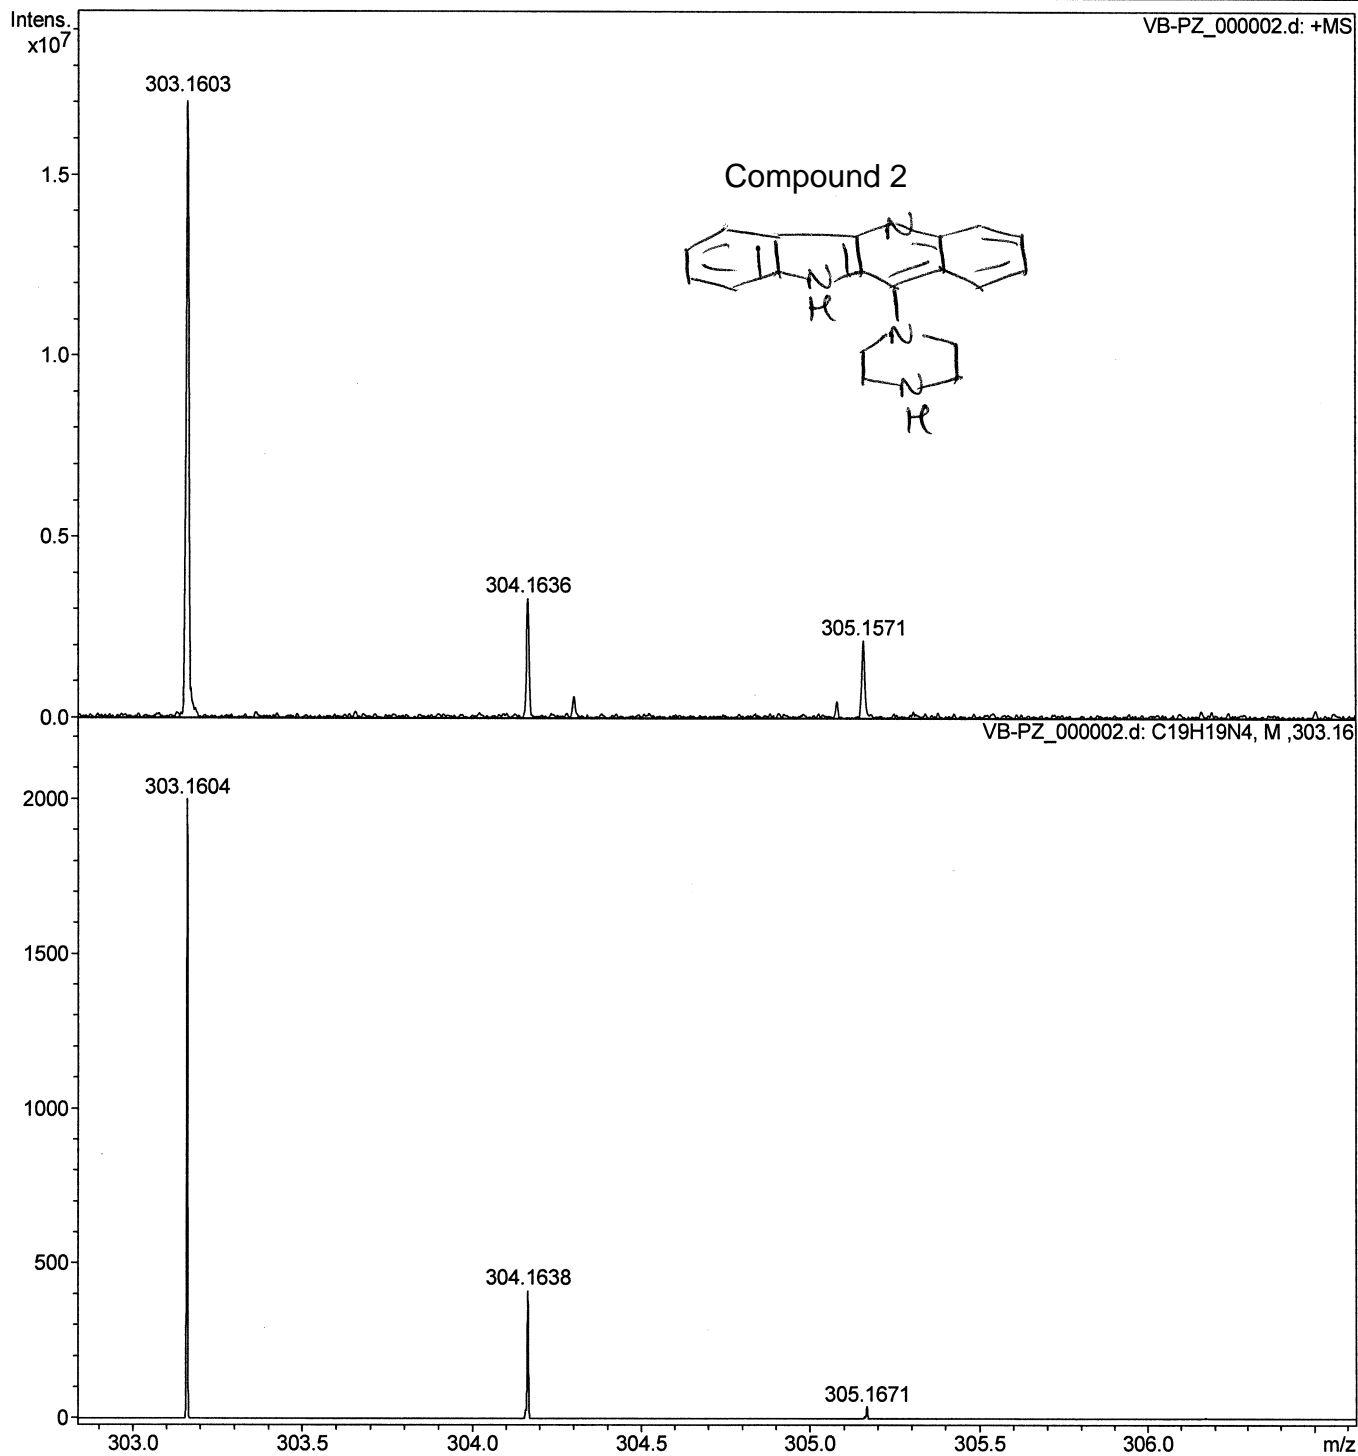

## Compound 2

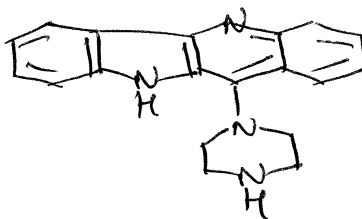

**Generate Molecular Formula** ? X

Min

Max

Note: for m < 2000 the elements C, H, N, and O are considered implicitly.

Measured m/z  Tolerance  mDa  Charge

| # | Mol. Formula                                                  | m/z      | err [mDa] | len [ppm] | err [ppm] | mean err [ppm] | % |
|---|---------------------------------------------------------------|----------|-----------|-----------|-----------|----------------|---|
| 1 | C <sub>18</sub> H <sub>23</sub> O <sub>4</sub>                | 303.1591 | -1.24     | 4.1       | -4.1      | -2.2           | 0 |
| 2 | C <sub>21</sub> H <sub>21</sub> N <sub>1</sub> O <sub>1</sub> | 303.1618 | 1.44      | 4.7       | 4.7       | 7.1            | 0 |
| 3 | C <sub>19</sub> H <sub>19</sub> N <sub>4</sub>                | 303.1604 | 0.10      | 0.3       | 0.3       | 2.2            | 0 |

Automatically locate monoisotopic peak    Maximum number of formulas   
 Check rings plus double bonds    Minimum     Maximum   
 Apply nitrogen rule    Electron configuration    
 Filter H/C element ratio    Minimum H/C     Maximum H/C   
 Estimate carbon number     Generate immediately

S12

- 10.889
- 8.344
- 8.341
- 8.311
- 8.285
- 8.159
- 8.156
- 8.131
- 8.129
- 7.655
- 7.651
- 7.646
- 7.633
- 7.628
- 7.622
- 7.616
- 7.606
- 7.600
- 7.594
- 7.590
- 7.571
- 7.567
- 7.548
- 7.543
- 7.539
- 7.521
- 7.516
- 7.281
- 7.275
- 7.259
- 7.254
- 7.250
- 7.233
- 7.228
- 3.490
- 3.368
- 2.682
- 2.578
- 2.507
- 2.502
- 2.357

Compound 3

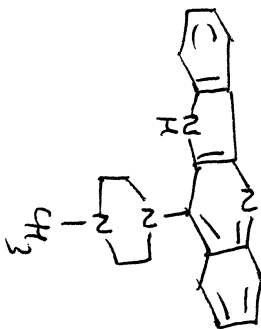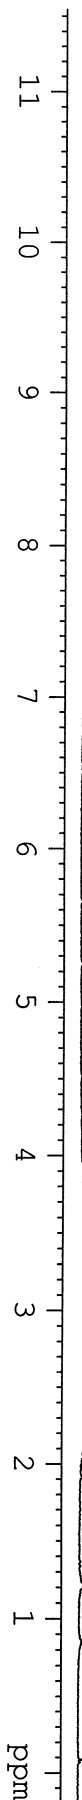

Current Data Parameters  
 NAME VB-Code-5  
 EXPNO 6  
 PROCNO 1

F2 - Acquisition Parameters

Date\_ 20080602  
 Time\_ 13.44  
 INSTRUM spect  
 PROBHD 5 mm QNP 1H/1  
 PULPROG zg30  
 TD 65536  
 SOLVENT DMSO  
 NS 16  
 DS 2  
 SWH 6172.839 Hz  
 FIDRES 0.094190 Hz  
 AQ 5.3084660 sec  
 RG 287.4  
 DW 81.000 usec  
 DE 6.00 usec  
 TE 300.0 K  
 D1 1.00000000 sec

==== CHANNEL f1 =====

NUC1 1H  
 P1 9.25 usec  
 PL1 0.00 dB  
 SFO1 300.1318534 MHz

F2 - Processing parameters

SI 32768  
 SF 300.1300000 MHz  
 WDW EM  
 SSB 0  
 LB 0.30 Hz  
 GB 0  
 PC 1.00

1.018

2.171

1.072

4.318

1.125

4.054

4.000

3.180

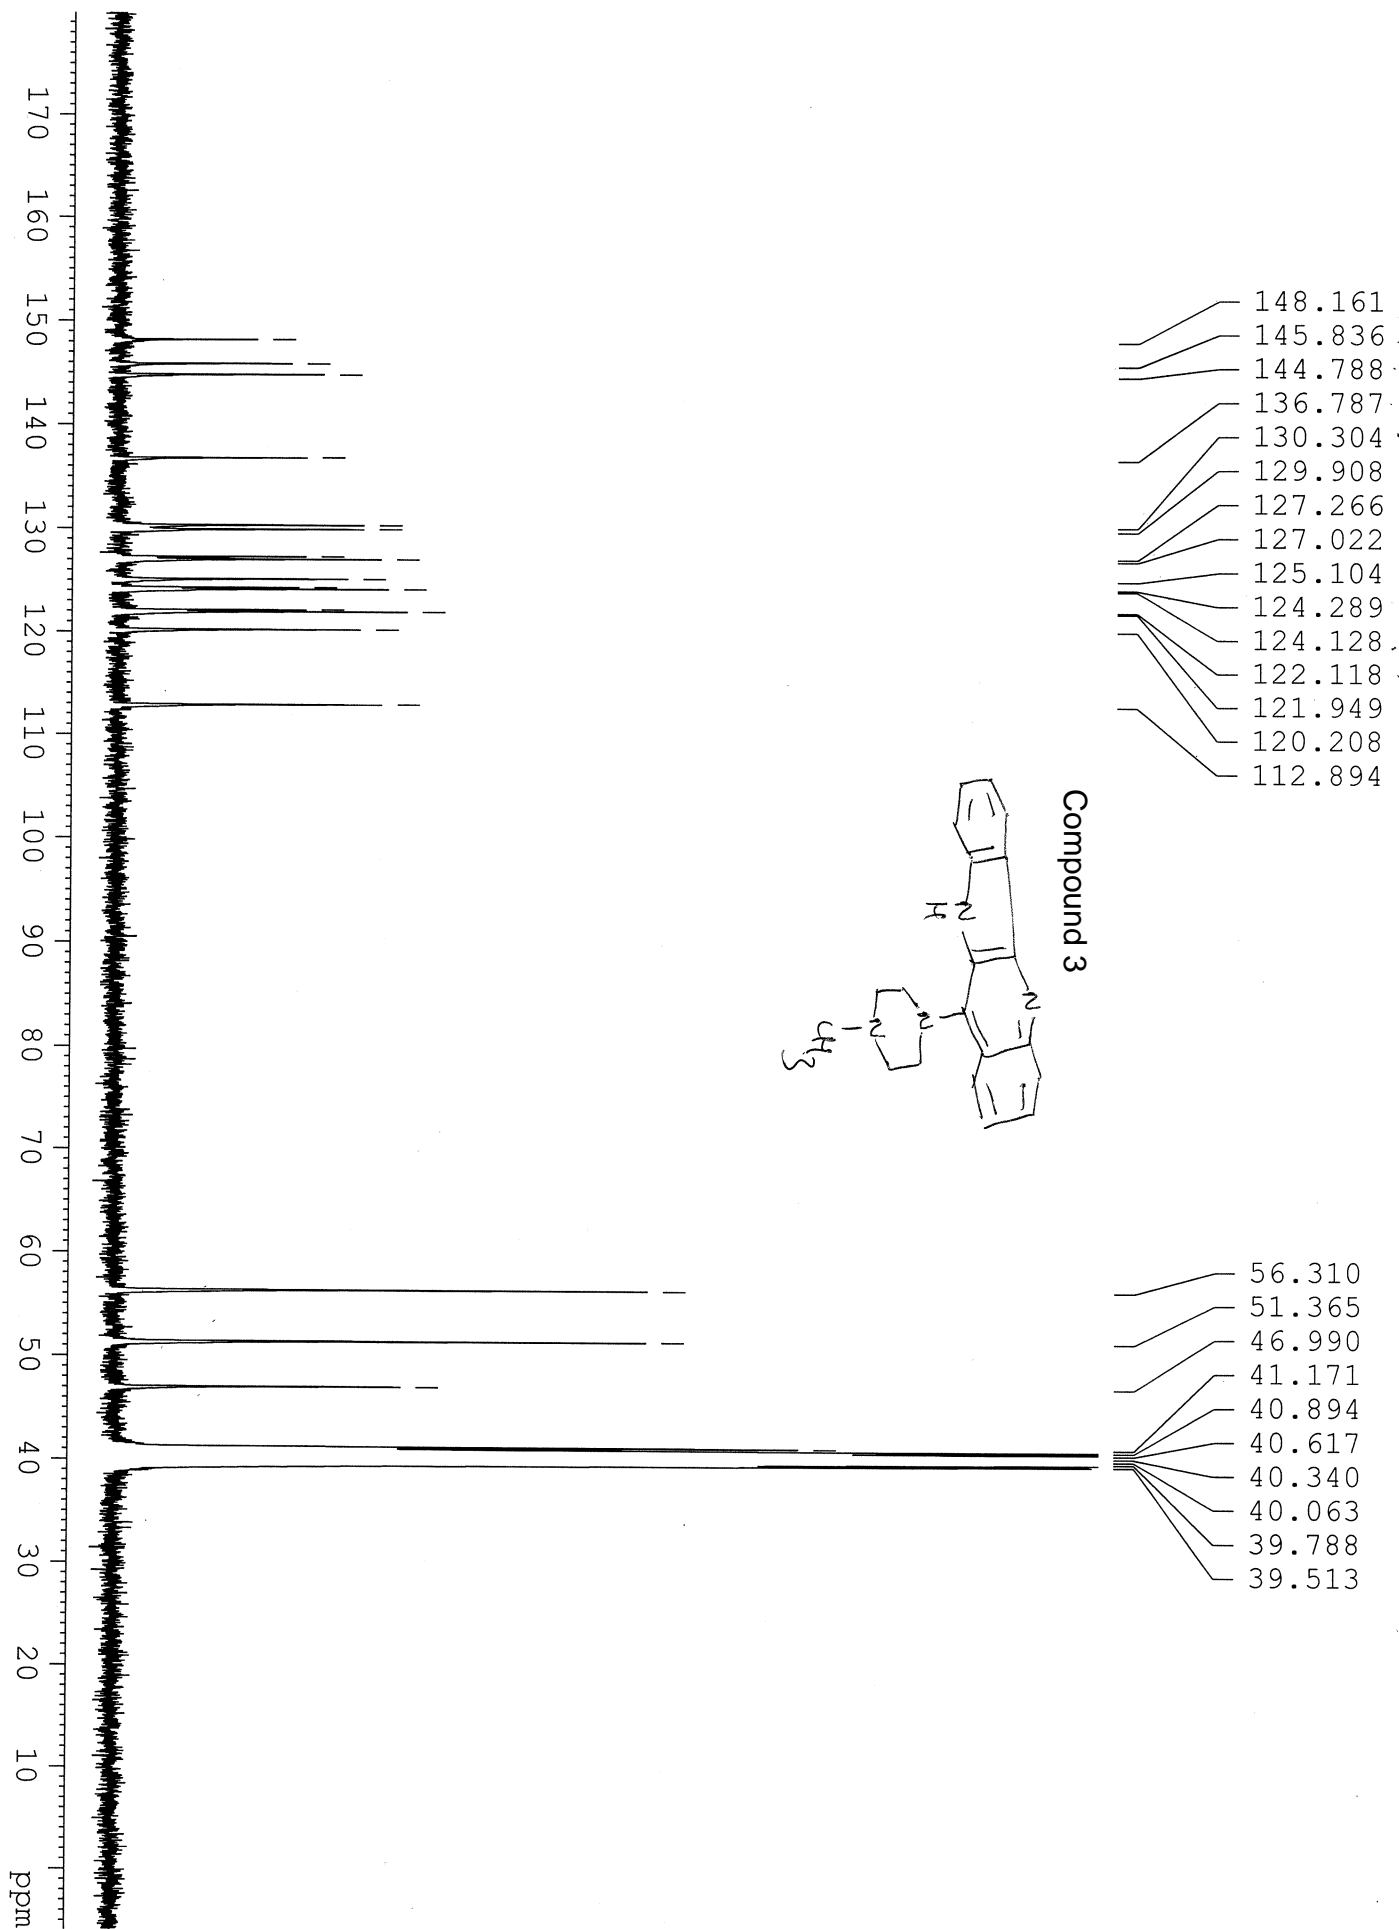

=====  
Injection Date : 5/21/08 3:38:02 PM  
Sample Name : VB-N-Me-Pz Vial : 4  
Acq. Operator : Karen Inj : 1  
Inj Volume : 0.1 µl  
Method : D:\HPCHEM\1\METHODS\SCOTT\_C.M  
Last changed : 5/21/08 3:36:29 PM by Karen  
Zorbax C18 SB column, 3.5µ, 4.6 x 150mm, mp=30/70/0.175, MeOH:water:HAc; scan 150-500; flow  
0.5mL/min; vcap 2500, frag 70; col temp 40  
=====

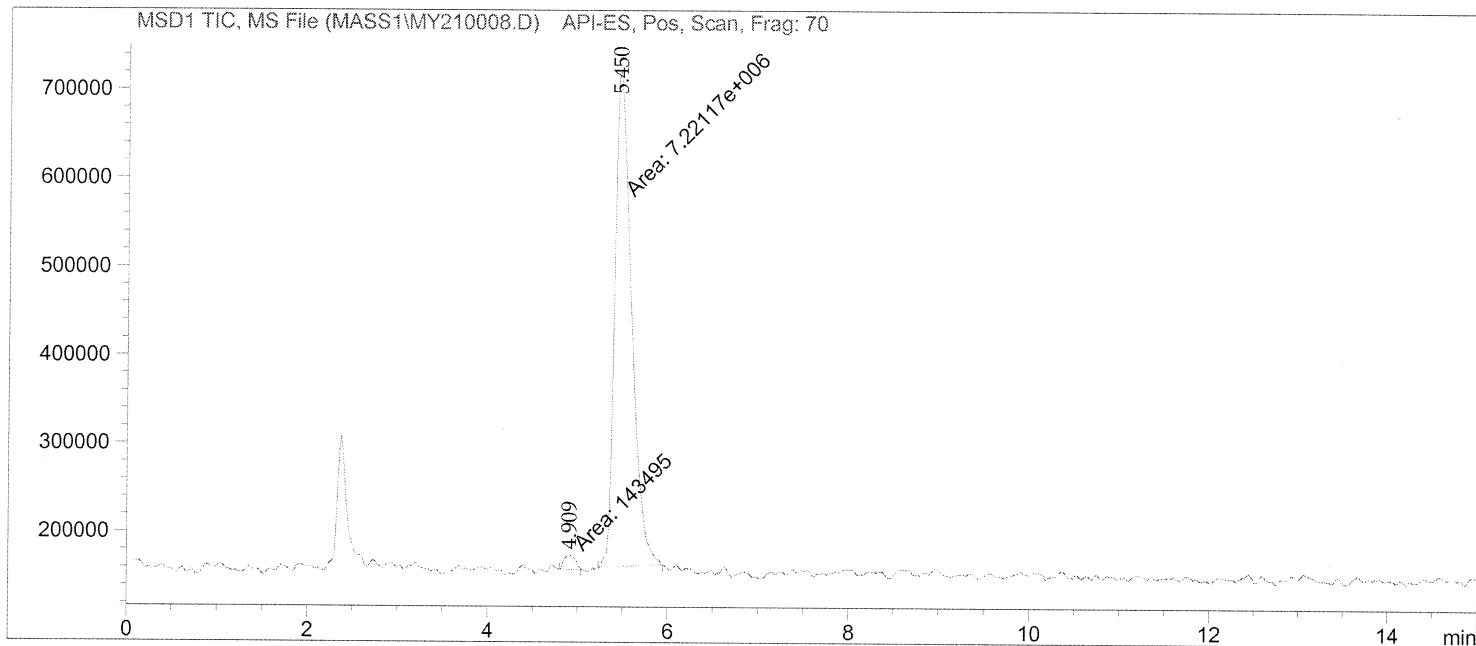

=====  
Area Percent Report  
=====

Sorted By : Retention Time  
Calib. Data Modified : Tuesday, November 27, 2007 2:17:56 PM  
Multiplier : 1.0000  
Dilution : 1.0000

Signal 1: MSD1 TIC, MS File

| Peak # | RetTime [min] | Sig | Type | Area      | Area %  | Name |
|--------|---------------|-----|------|-----------|---------|------|
| 1      | 4.909         | 1   | MM   | 1.43495e5 | 1.9484  | ?    |
| 2      | 5.450         | 1   | MM   | 7.22117e6 | 98.0516 |      |

Compound 3

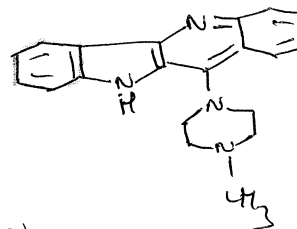

Totals : 7.36467e6

1 Warnings or Errors :

Warning : Calibration warnings (see calibration table listing)

=====  
\*\*\* End of Report \*\*\*

=====  
Injection Date : 5/21/08 3:38:02 PM

Sample Name : VB-N-Me-Pz

Acq. Operator : Karen

Vial : 4

Inj : 1

Inj Volume : 0.1  $\mu$ l

Method : D:\HPCHEM\1\METHODS\SCOTT\_C.M

Last changed : 5/21/08 3:36:29 PM by Karen

Zorbax C18 SB column, 3.5 $\mu$ , 4.6 x 150mm, mp=30/70/0.175, MeOH:water:HAC; scan 150-500;  
flow 0.5mL/min; vcap 2500, frag 70; col temp 40

Current Chromatogram(s)

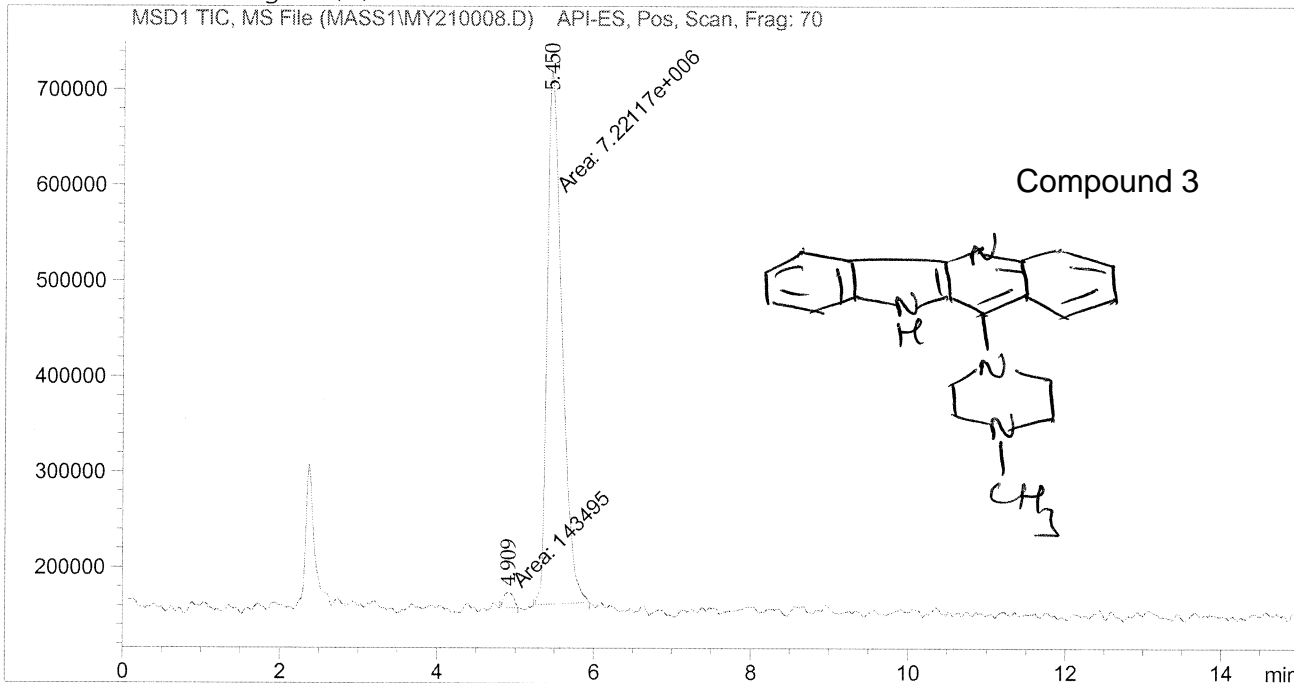

Apex Mass Spectrum of Peak 5.45 of MY210008.D

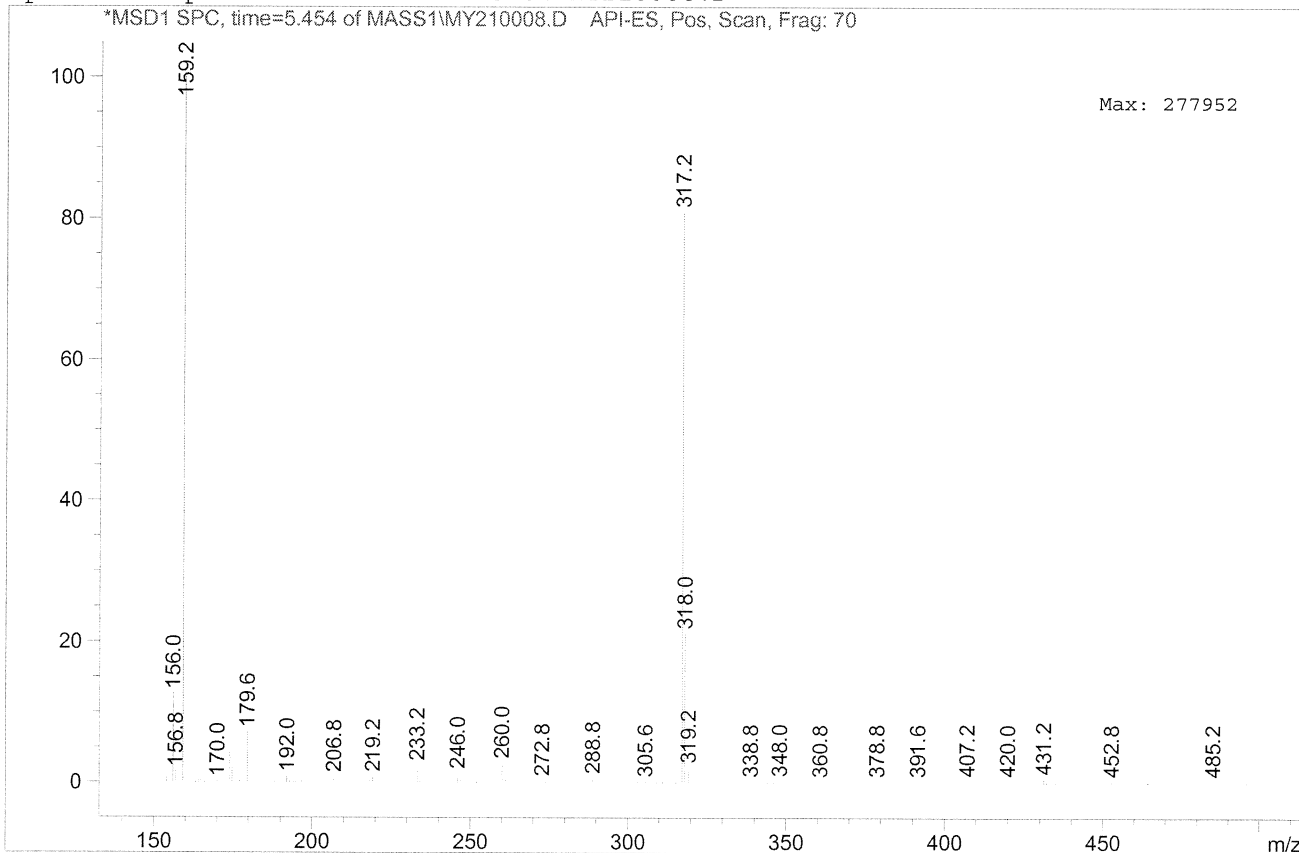

VB\_45 #31-34 RT: 0.86-0.95 AV: 4 NL: 7.85E6  
T: + p Full ms [ 85.00-2000.00]

317.3  
MH<sup>+</sup>

Compound 3

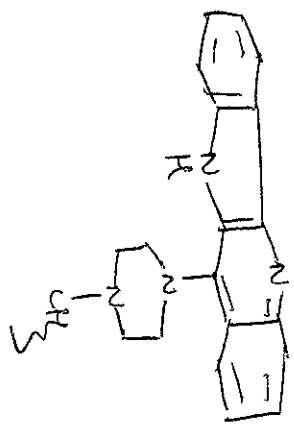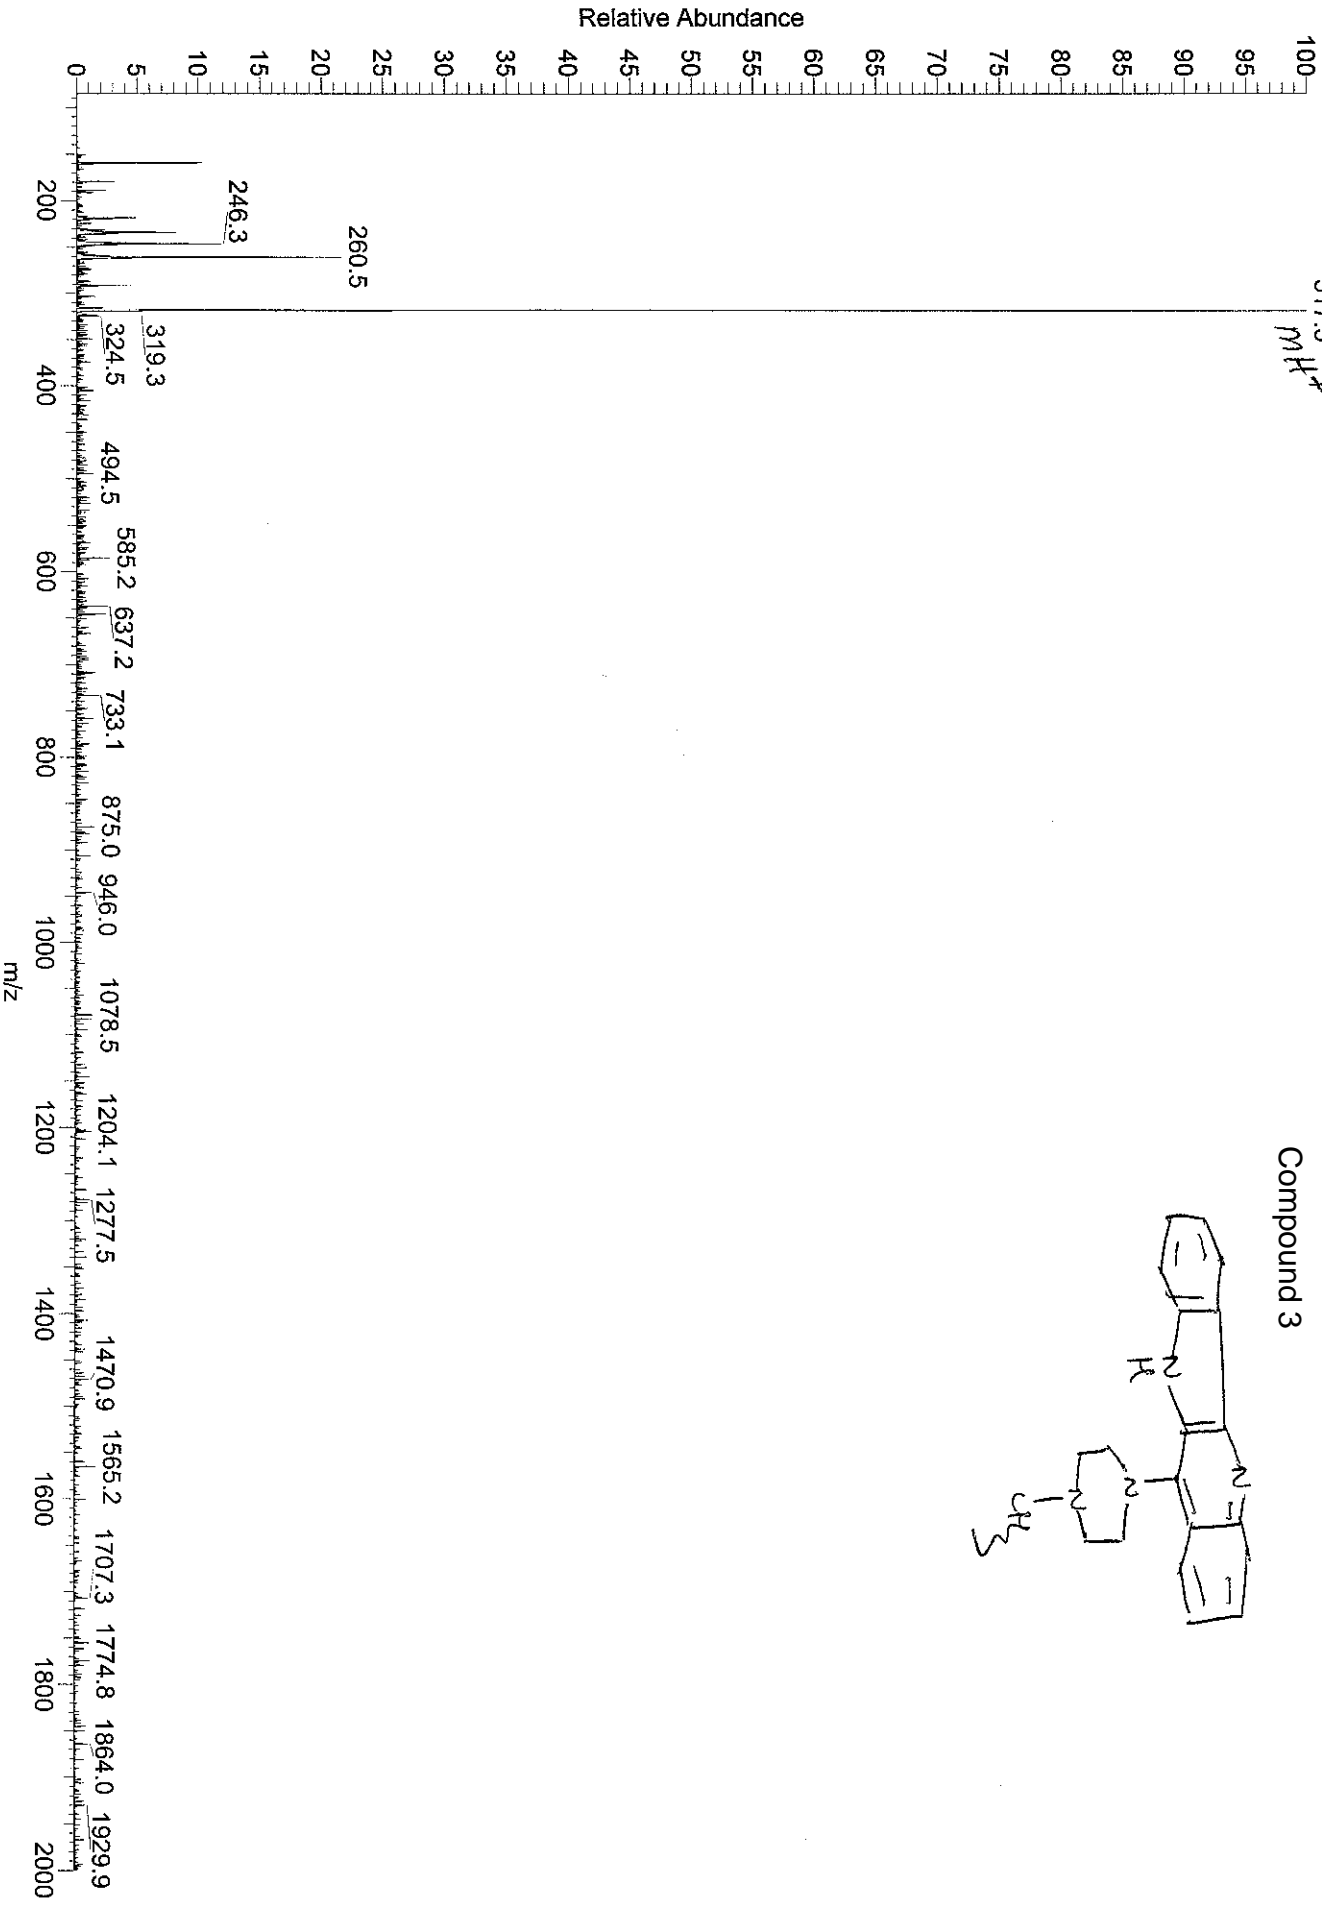



VB\_45 #9-16 RT: 0.24-0.36 AV: 8 NL: 2.55E6  
T: + Z ms [312.00-322.00]

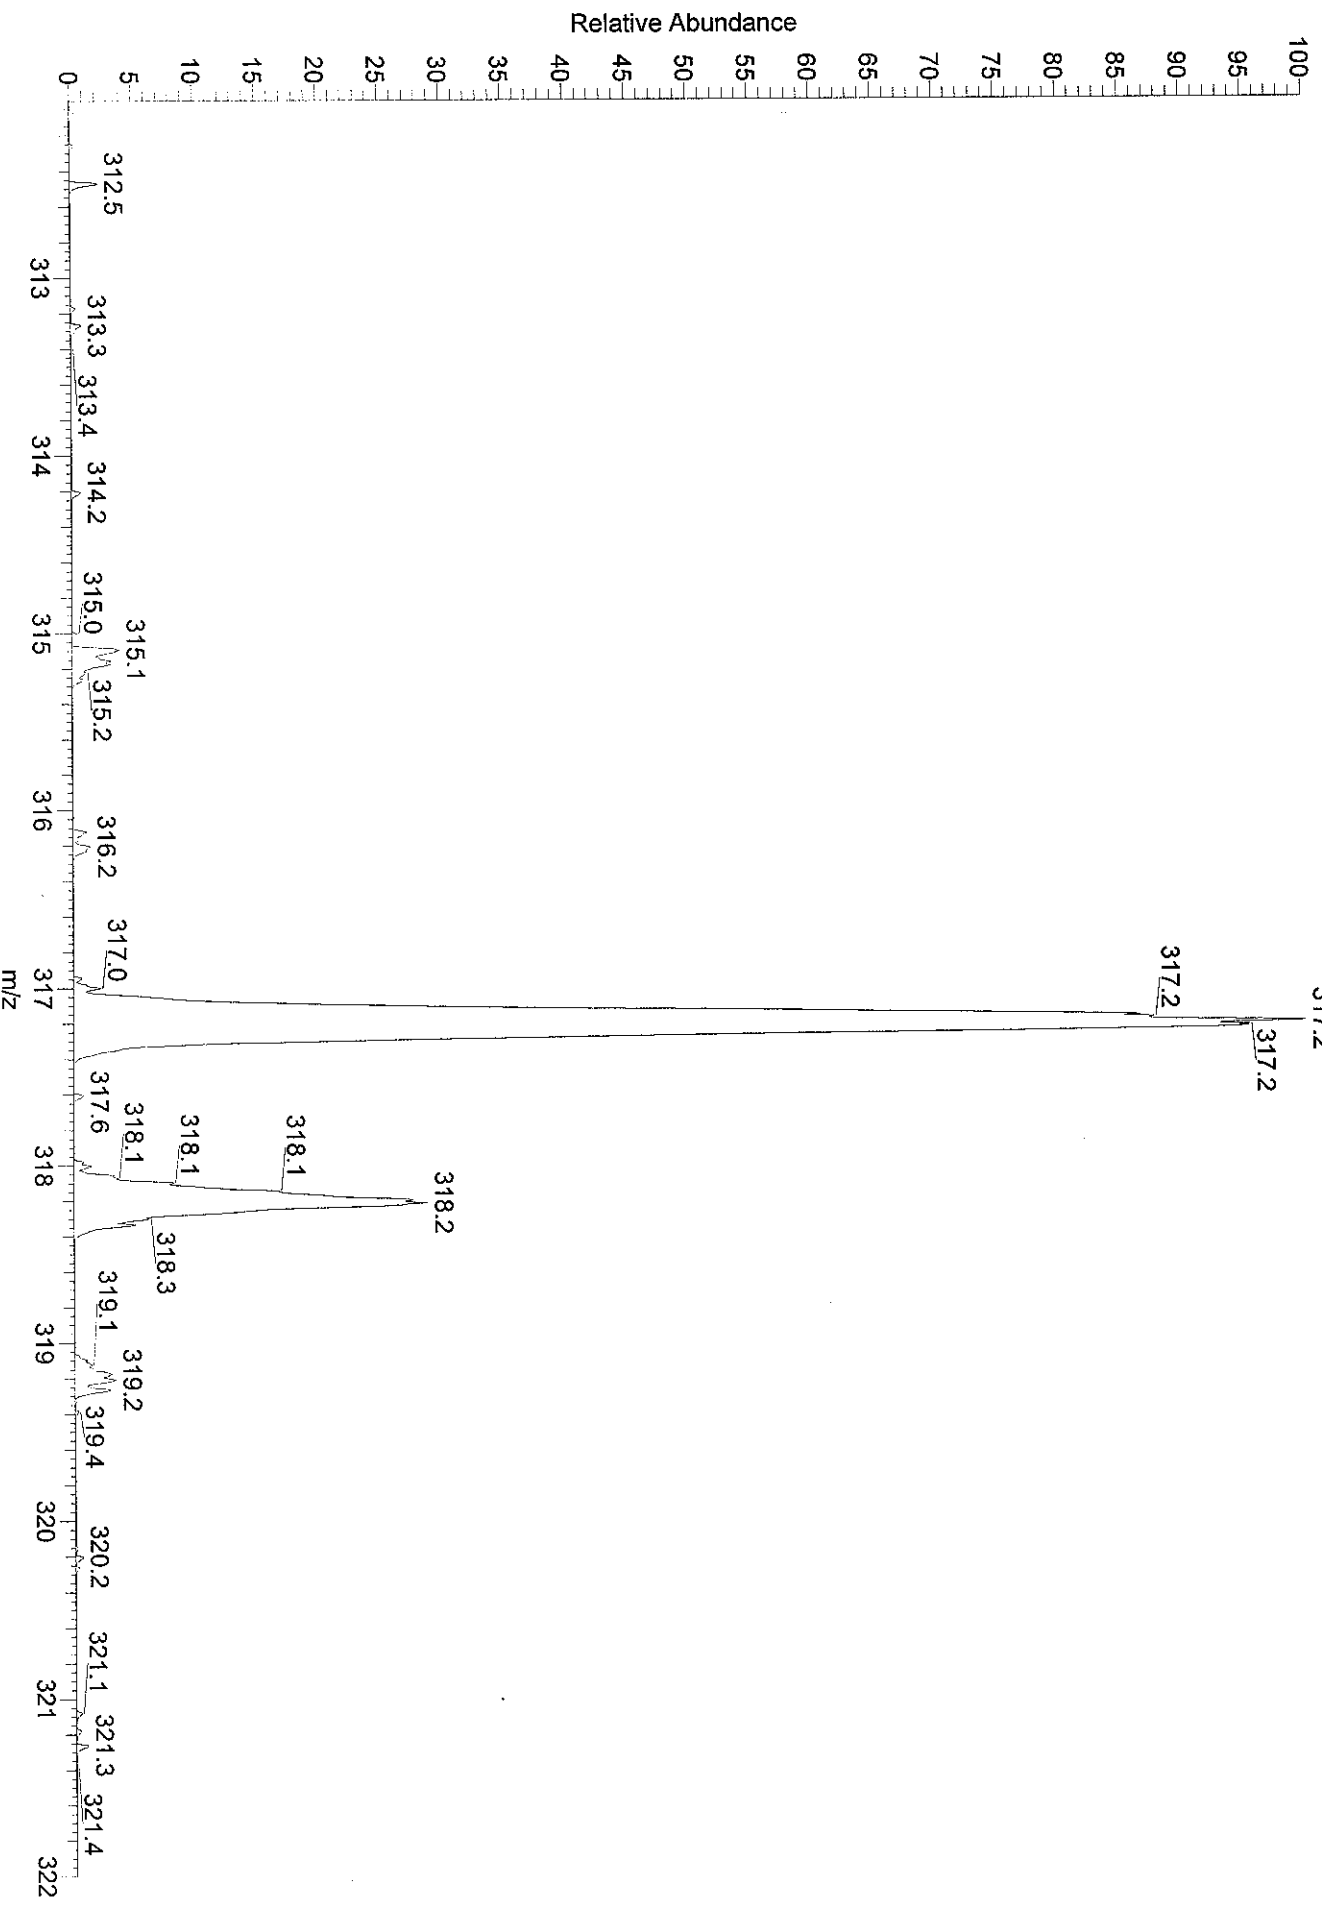

VB\_45 #26-29 RT: 0.68-0.79 AV: 4 NL: 4.85E6  
T: + p Full ms2 317.90@30.00 [85.00-2000.00]

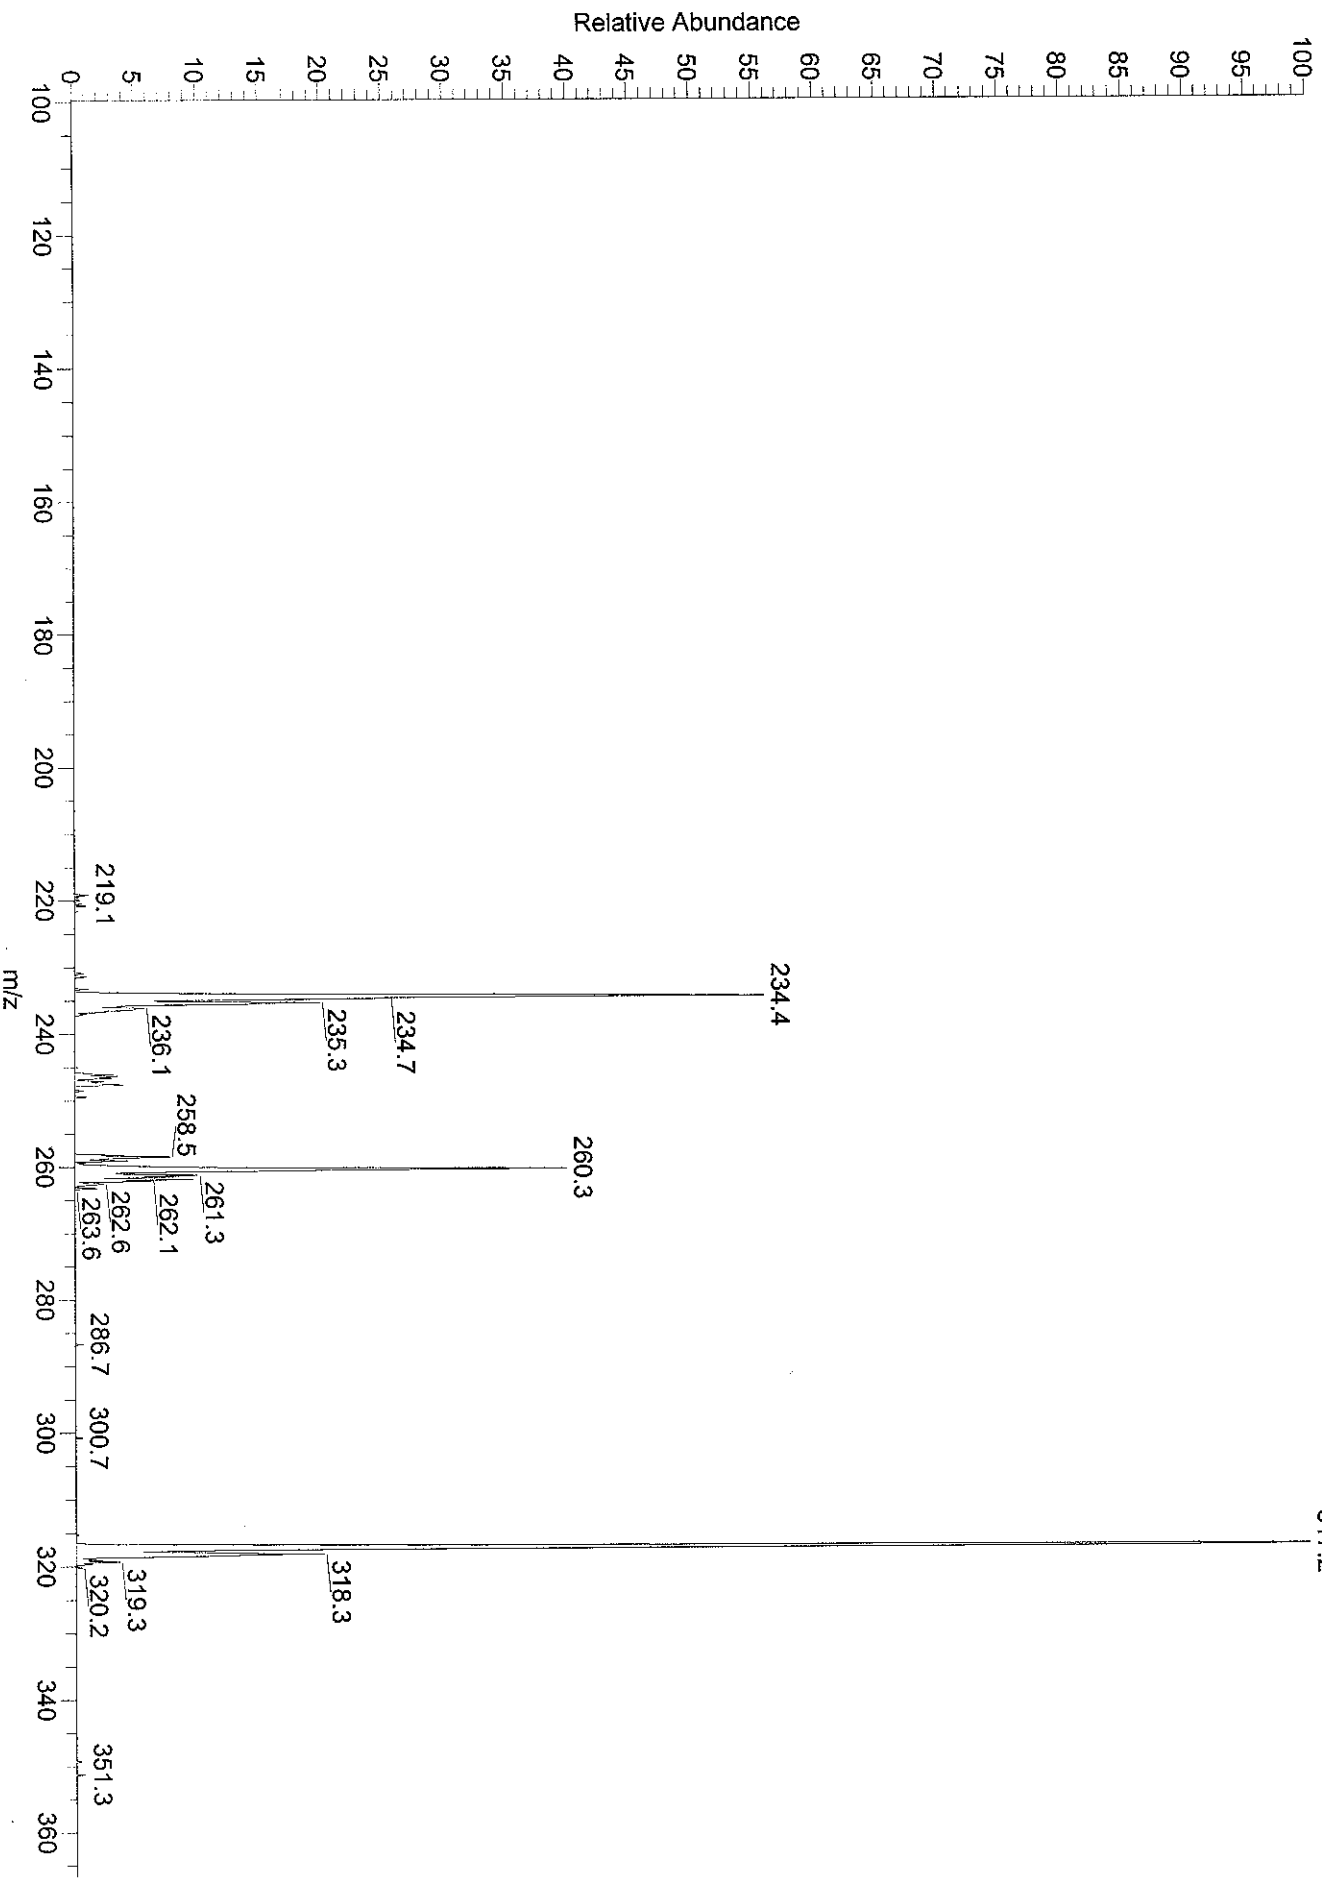

## Generic Display Report

## Analysis Info

Analysis Name D:\DATA\Facility\_May\_5\VB\_45\_000001.d  
Method ESI\_101506  
Sample Name VB-45  
Comment Venkat B., MeOH:H2O:AcOH

Acquisition Date 5/27/2008 1:04:23 PM

Operator Administrator  
Instrument apex-Qe

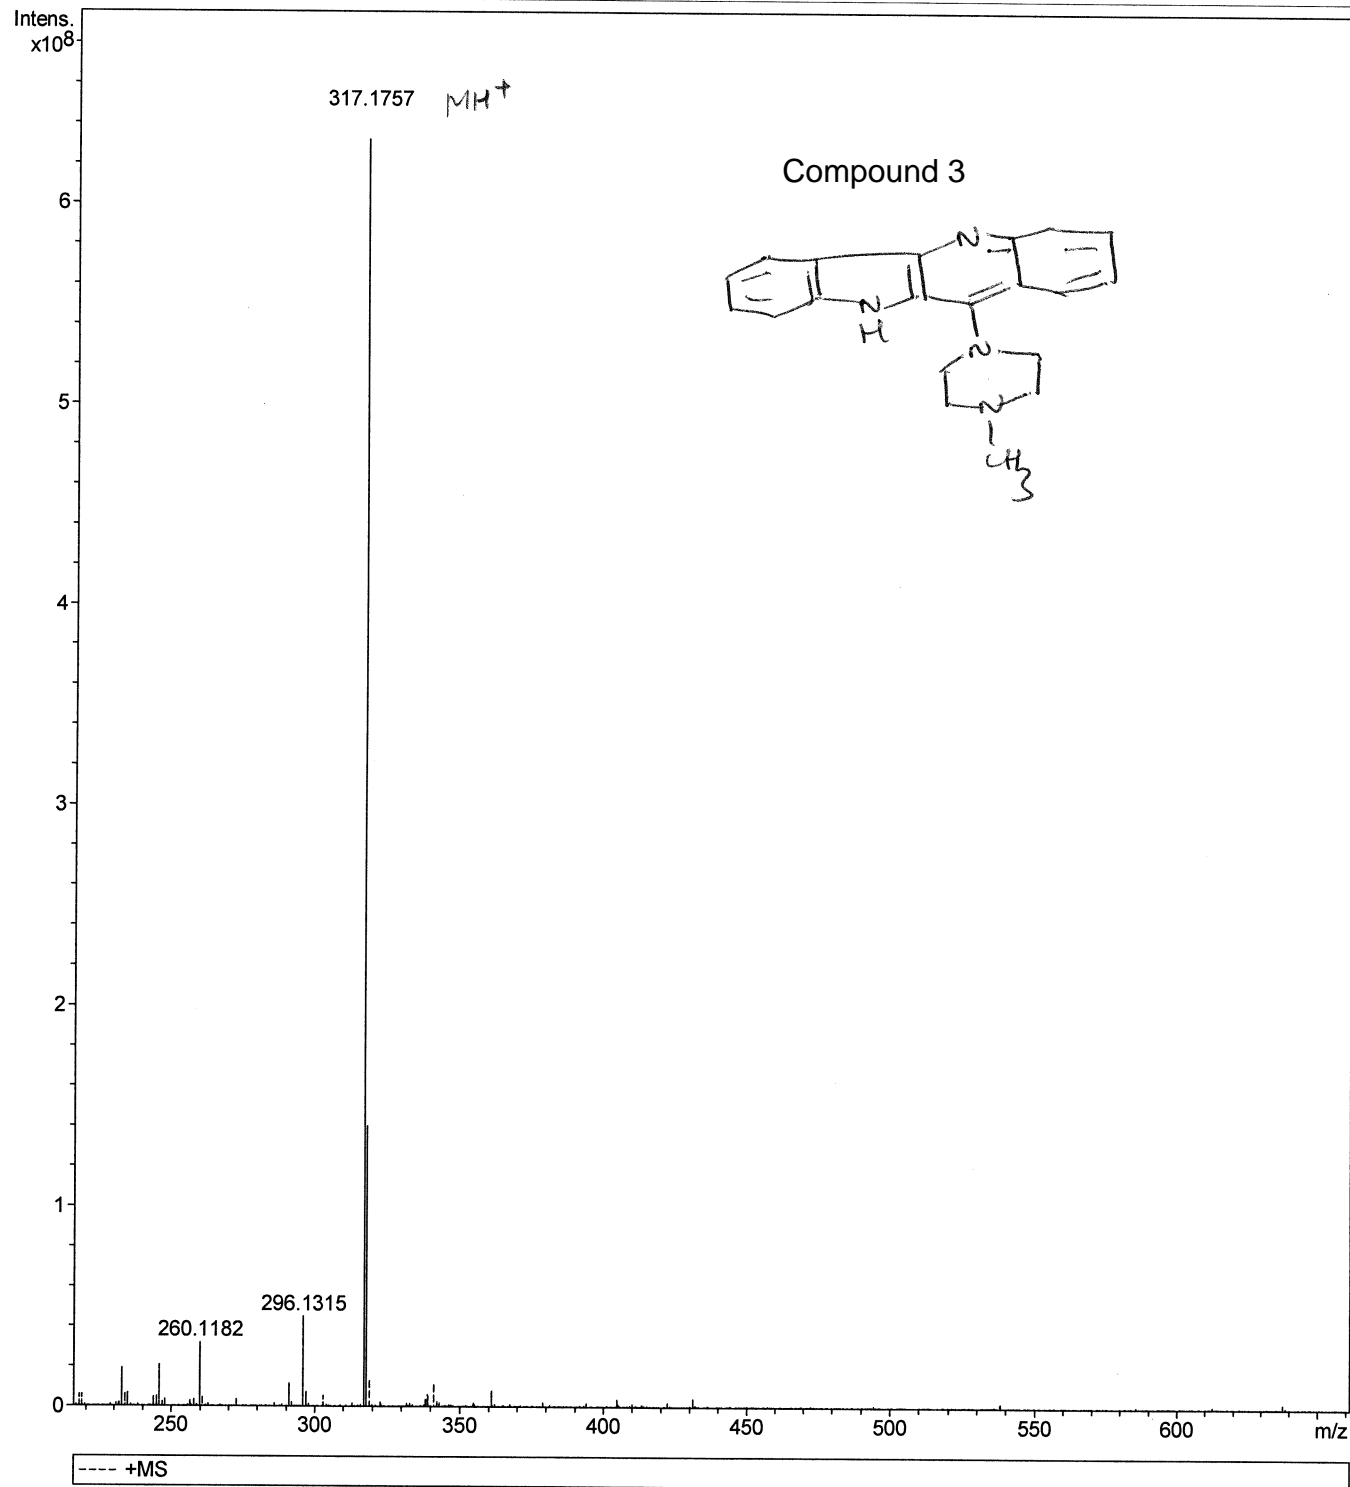

**Generate Molecular Formula** ? X

Min

Max

Note: for m < 2000 the elements C, H, N, and O are considered implicitly.

Measured m/z  Tolerance  mDa  Charge

| # | Mol. Formula                                                  | m/z      | err [mDa] | terr [ppm] | err [ppm] | mean err [ppm] |
|---|---------------------------------------------------------------|----------|-----------|------------|-----------|----------------|
| 1 | C <sub>19</sub> H <sub>25</sub> O <sub>4</sub>                | 317.1747 | -0.95     | 3.0        | -3.0      | -3.1           |
| 2 | C <sub>20</sub> H <sub>21</sub> N <sub>4</sub>                | 317.1761 | 0.39      | 1.2        | 1.2       | 0.9            |
| 3 | C <sub>22</sub> H <sub>23</sub> N <sub>1</sub> O <sub>1</sub> | 317.1774 | 1.73      | 5.5        | 5.5       | 5.3            |

Compound 3

CN1CCN1C2=CN3C=CC=CC3=CN2

---

Automatically locate monoisotopic peak Maximum number of formulas

Check rings plus double bonds Minimum  Maximum

Apply nitrogen rule Electron configuration

Filter H/C element ratio Minimum H/C  Maximum H/C

Estimate carbon number  Generate immediately

VB-GSA-0820  
 VB-GSA-0148

Compound 4

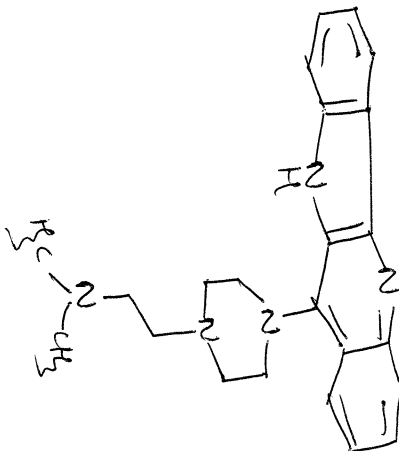

- 10.880
- 8.344
- 8.315
- 8.311
- 8.280
- 8.151
- 8.123
- 7.647
- 7.624
- 7.613
- 7.610
- 7.588
- 7.567
- 7.563
- 7.544
- 7.540
- 7.250

- 3.483
- 3.369
- 2.776
- 2.592
- 2.574
- 2.550
- 2.505
- 2.500
- 2.469
- 2.451
- 2.446
- 2.426
- 2.195

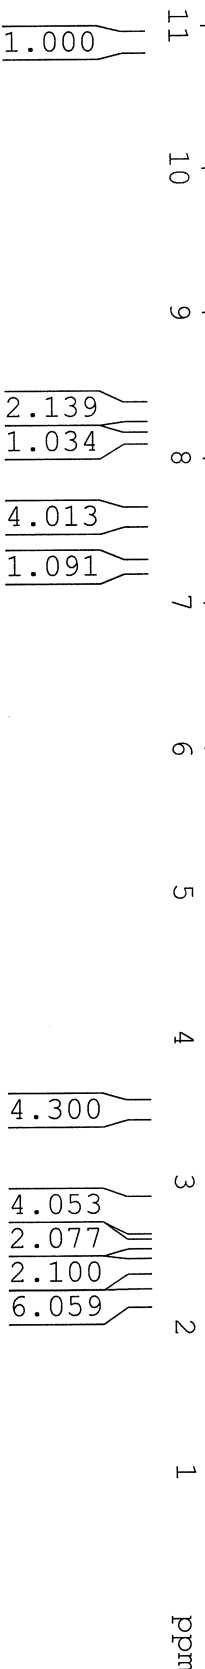

Current Data Parameters  
 NAME VB-0820-2 nd  
 EXPNO 3  
 PROCNO 1

F2 - Acquisition Parameters  
 Date\_ 20080714  
 Time\_ 11.30  
 INSTRUM spect  
 PROBD 5 mm QNP 1H/1  
 PULPROG zg30  
 TD 65536  
 SOLVENT DMSO  
 NS 16  
 DS 2  
 SWH 6172.839 Hz  
 FIDRES 0.094190 Hz  
 AQ 5.3084660 sec  
 RG 362  
 DW 81.000 usec  
 DE 6.00 usec  
 TE 300.0 K  
 D1 1.00000000 sec

==== CHANNEL f1 =====  
 NUC1 1H  
 P1 9.25 usec  
 PL1 0.00 dB  
 SFO1 300.1318534 MHz  
 F2 - Processing parameters  
 SI 32768  
 SF 300.1300000 MHz  
 WDM EM  
 SSB 0  
 LB 0.30 Hz  
 GB 0  
 PC 1.00

Final Prep

Compound 4

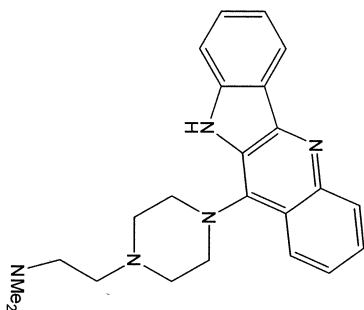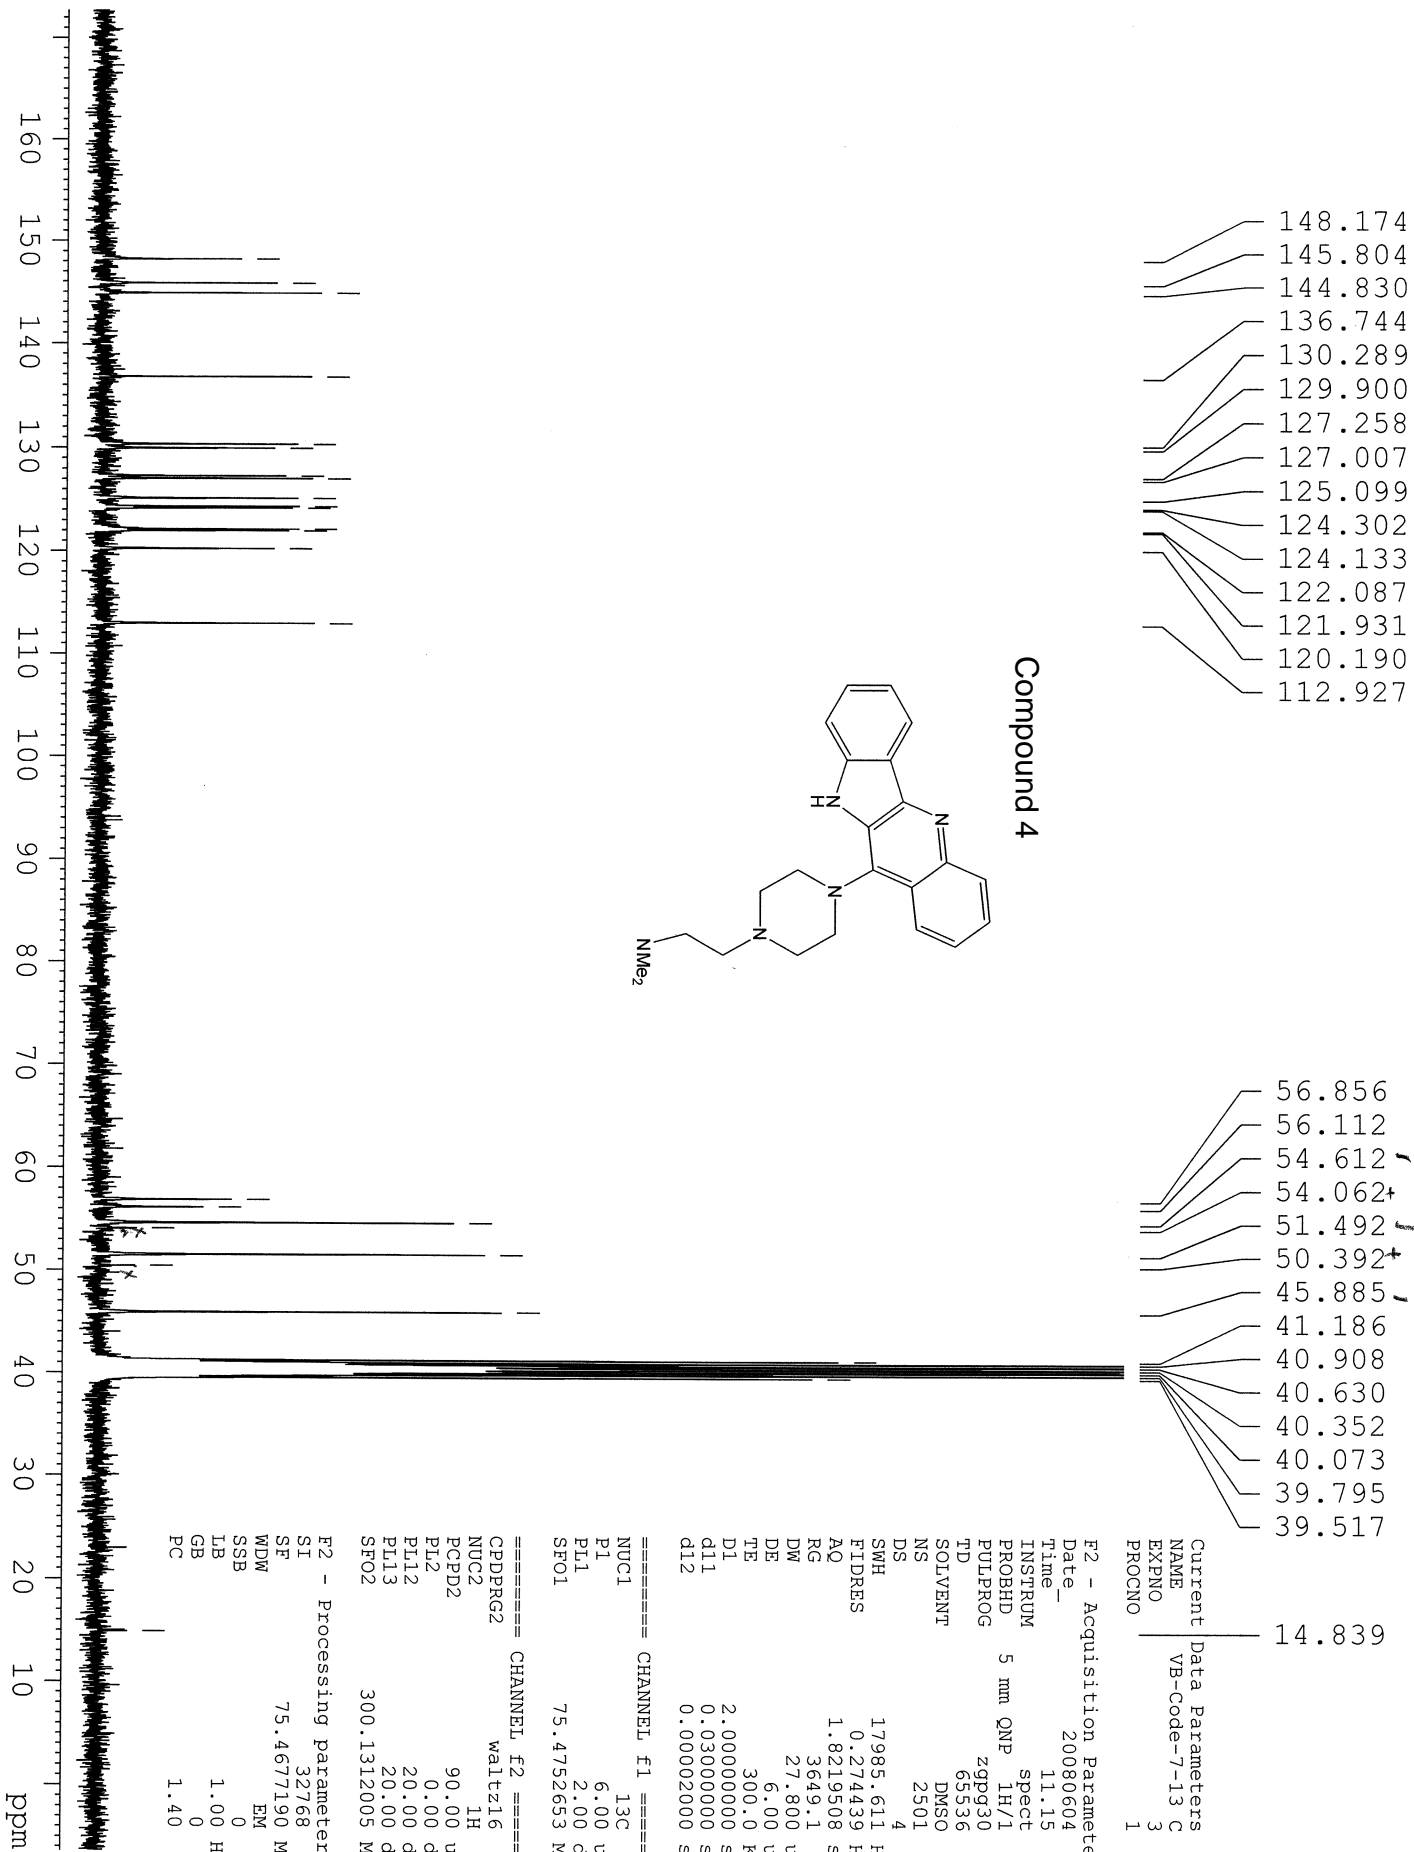

- 148.174
- 145.804
- 144.830
- 136.744
- 130.289
- 129.900
- 127.258
- 127.007
- 125.099
- 124.302
- 124.133
- 122.087
- 121.931
- 120.190
- 112.927

- 56.856
- 56.112
- 54.612
- 54.062
- 51.492
- 50.392
- 45.885
- 41.186
- 40.908
- 40.630
- 40.352
- 40.073
- 39.795
- 39.517

- 14.839

Current Data Parameters  
 NAME VB-Code-7-13 C  
 EXPNO 3  
 PROCNO 1

F2 - Acquisition Parameters

Date\_ 20080604  
 Time 11.15  
 INSTRUM spect  
 PROBHID 5 mm QNP 1H/1  
 PULPROG zgpg30  
 TD 65536  
 SOLVENT DMSO  
 NS 2501  
 DS 4  
 SWH 17985.611 Hz  
 FIDRES 0.274439 Hz  
 AQ 1.8219508 sec  
 RG 3649.1  
 DW 27.800 usec  
 DE 6.00 usec  
 TE 300.0 K  
 D1 2.00000000 sec  
 d11 0.03000000 sec  
 d12 0.00002000 sec

==== CHANNEL f1 =====  
 NUC1 13C  
 P1 6.00 usec  
 PL1 2.00 dB  
 SF01 75.4752653 MHz

==== CHANNEL f2 =====  
 CPDPRG2 waltz16  
 NUC2 1H  
 PCPD2 90.00 usec  
 PL2 0.00 dB  
 PL12 20.00 dB  
 PL13 20.00 dB  
 SF02 300.1312005 MHz

F2 - Processing parameters  
 SI 32768  
 SF 75.4677190 MHz  
 WDW EM  
 SSB 0  
 LB 1.00 Hz  
 GB 0  
 PC 1.40

```

=====
Injection Date   : 5/28/08 5:04:30 PM
Sample Name     : VB-48-373
Acq. Operator  : Karen
Vial           : 13
Inj            : 1
Inj Volume     : 0.1 µl

Method          : D:\HPCHEM\1\METHODS\SCOTT_C.M
Last changed   : 5/28/08 5:02:33 PM by Karen
                (modified after loading)
Zorbax C18 SB column, 3.5µ, 4.6 x 150mm, mp=40/60/0.150, MeOH:water:HAC; scan 150-500; flow
0.5mL/min; vcap 2500, frag 50; col temp 30
=====
    
```

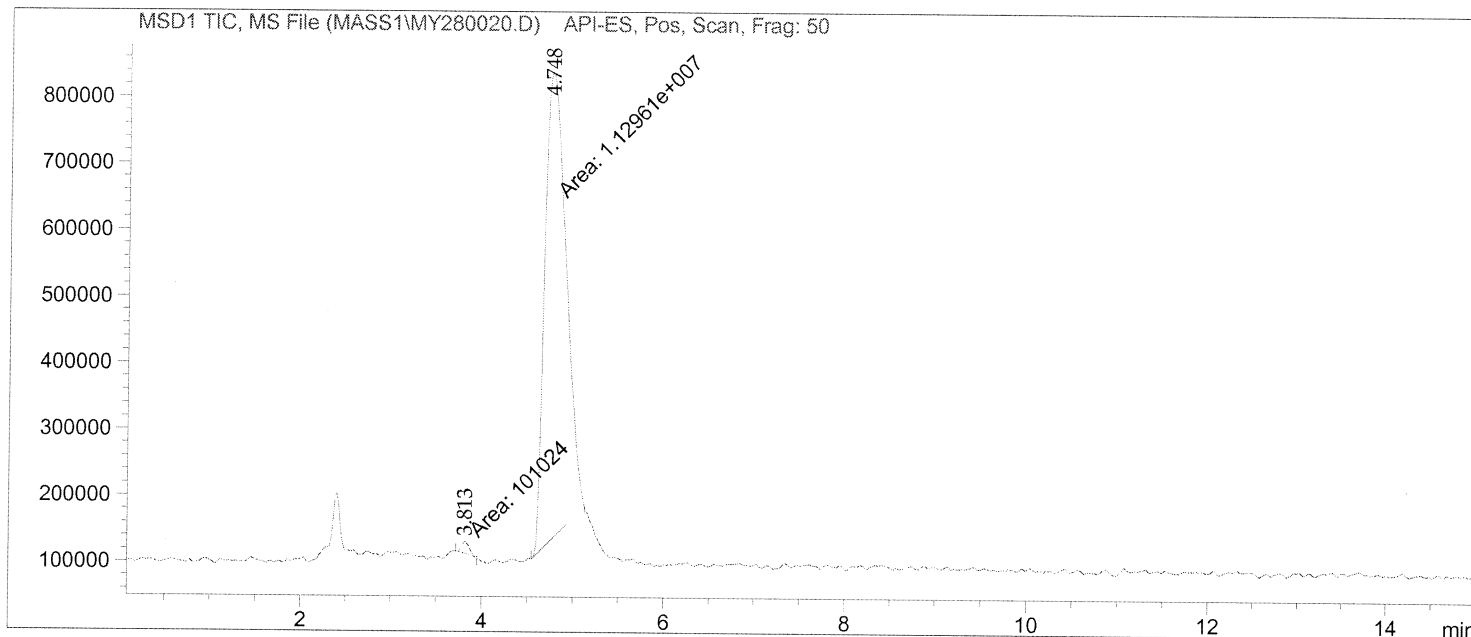

=====  
Area Percent Report  
=====

```

Sorted By           :      Retention Time
Calib. Data Modified :      Tuesday, November 27, 2007 2:17:56 PM
Multiplier          :      1.0000
Dilution            :      1.0000
    
```

Signal 1: MSD1 TIC, MS File

| Peak # | RetTime [min] | Sig | Type | Area      | Area %  | Name |
|--------|---------------|-----|------|-----------|---------|------|
| 1      | 3.813         | 1   | MM   | 1.01024e5 | 0.8864  | ?    |
| 2      | 4.748         | 1   | MM   | 1.12961e7 | 99.1136 | ✓    |

Totals :                    1.13971e7

1 Warnings or Errors :

Warning : Calibration warnings (see calibration table listing)

=====  
\*\*\* End of Report \*\*\*

Compound 4

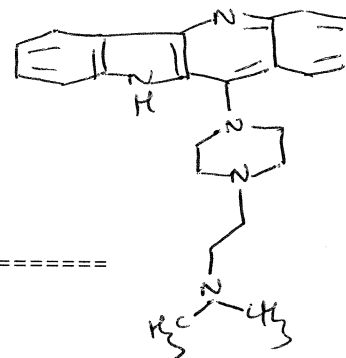

=====  
Injection Date : 5/28/08 5:04:30 PM  
Sample Name : VB-48-373  
Acq. Operator : Karen  
Vial : 13  
Inj : 1  
Inj Volume : 0.1 µl  
Method : D:\HPCHEM\1\METHODS\SCOTT\_C.M  
Last changed : 5/28/08 5:02:33 PM by Karen  
(modified after loading)  
Zorbax C18 SB column, 3.5µ, 4.6 x 150mm, mp=~~40/60~~/0.150, MeOH:water:HAc; scan 150-500;  
flow 0.5mL/min; vcap 2500, frag 50; col temp 30

Current Chromatogram(s)

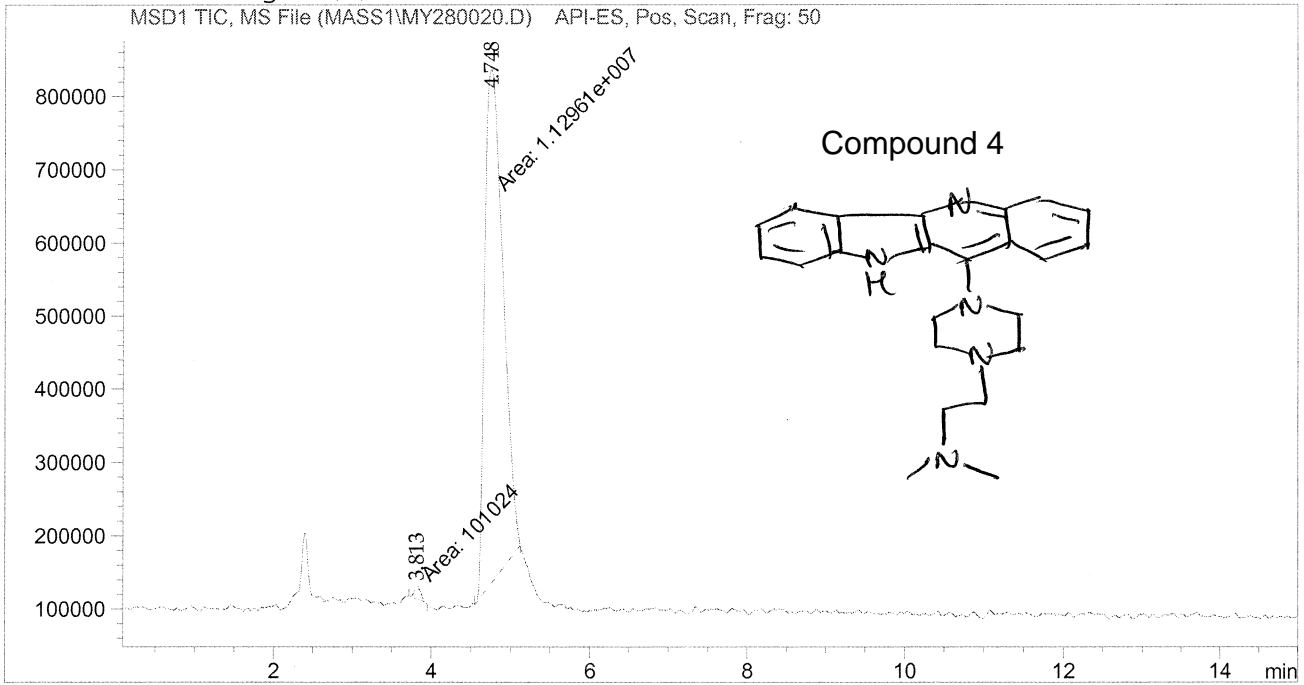

MS Spectrum

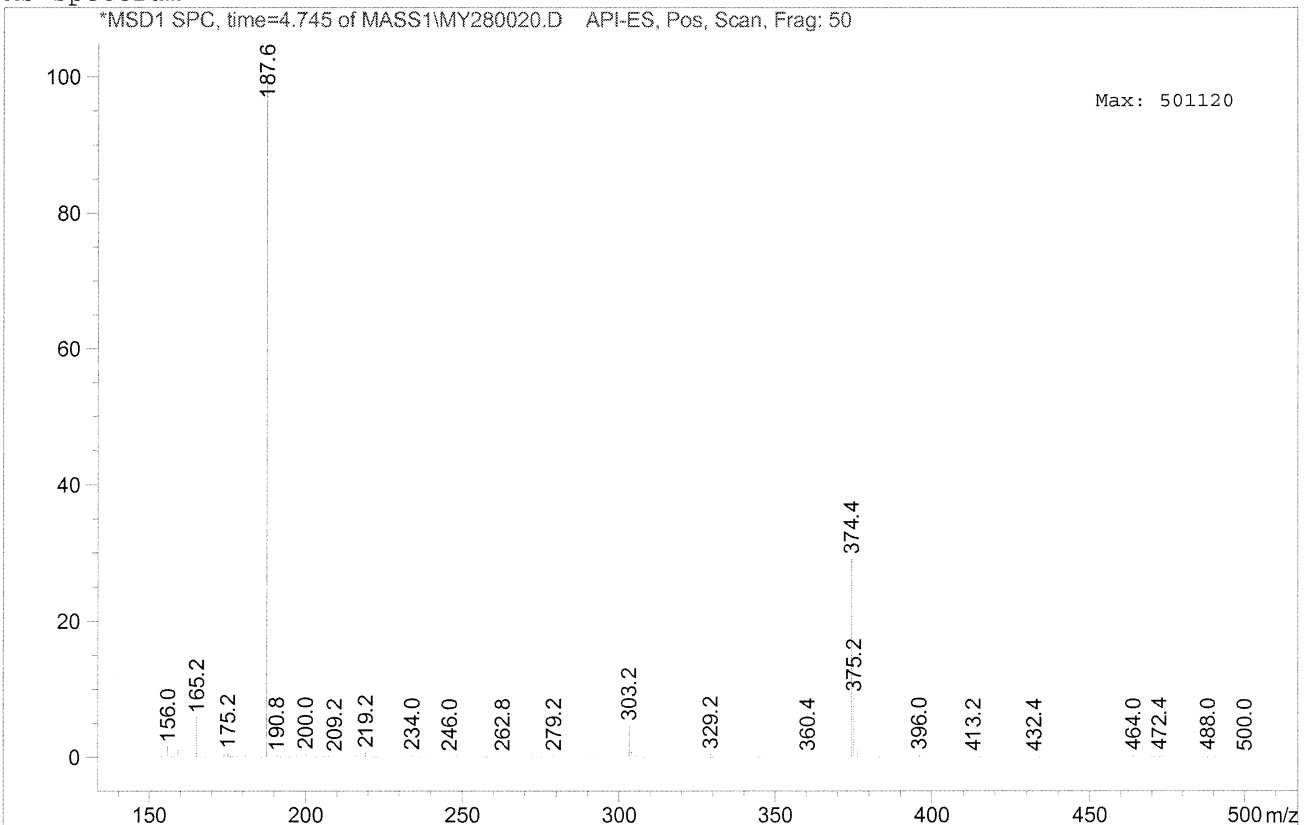



VB\_48 #23-27 RT: 0.64-0.77 AV: 5 NL: 8.71E6  
T: + P Full ms [100.00-2000.00]  
374.3 M<sup>+</sup>H<sup>+</sup>

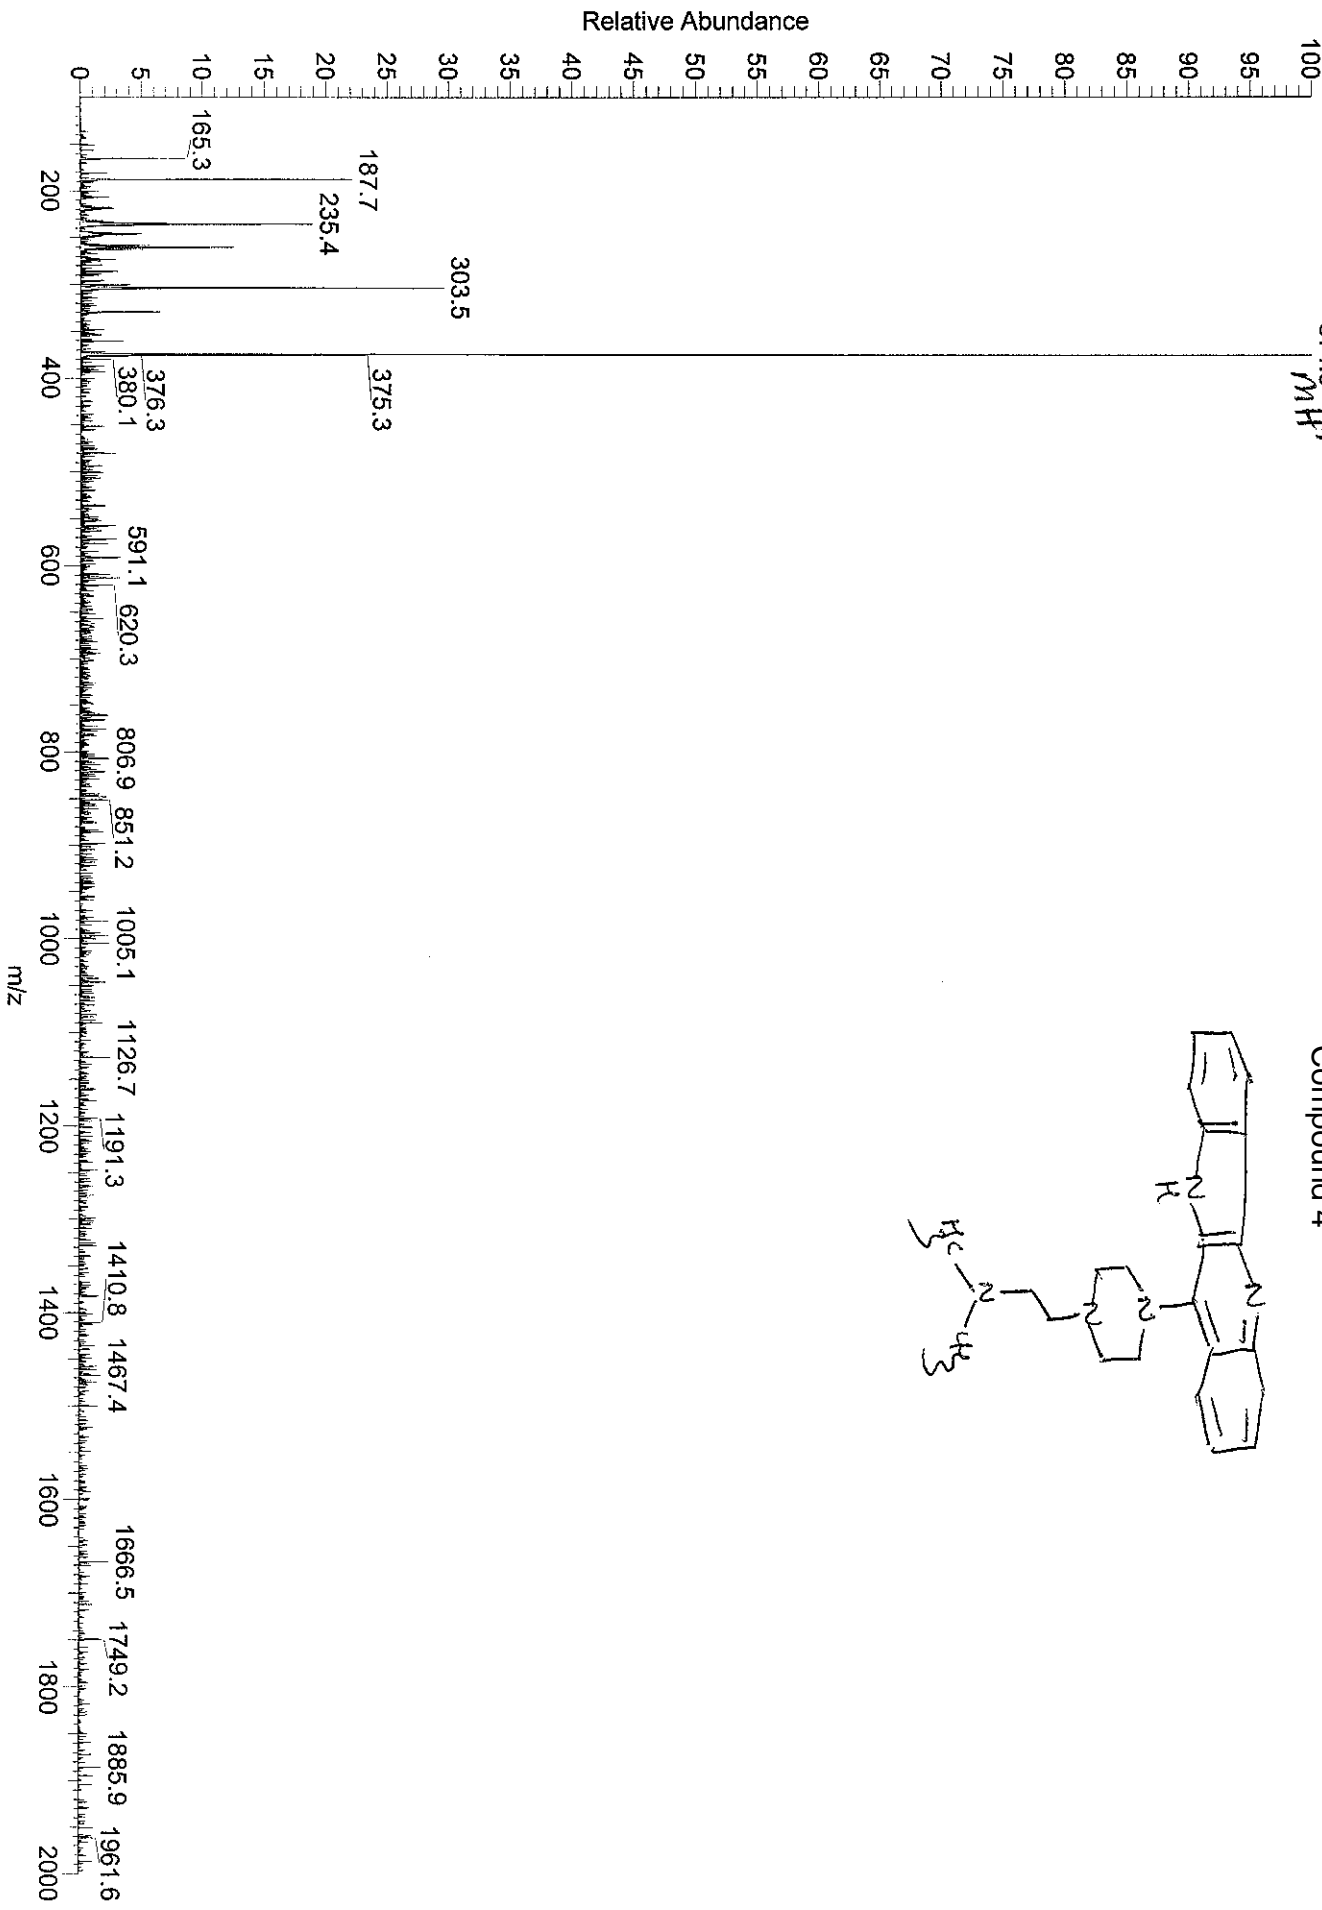

Compound 4

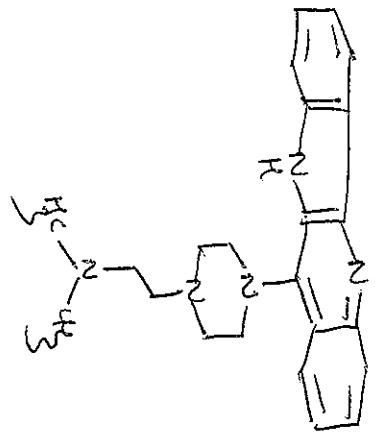

VB\_48 #7-13 RT: 0.20-0.30 AV: 7 NL: 3.51E6  
T: + Z ms [369.00-379.00]

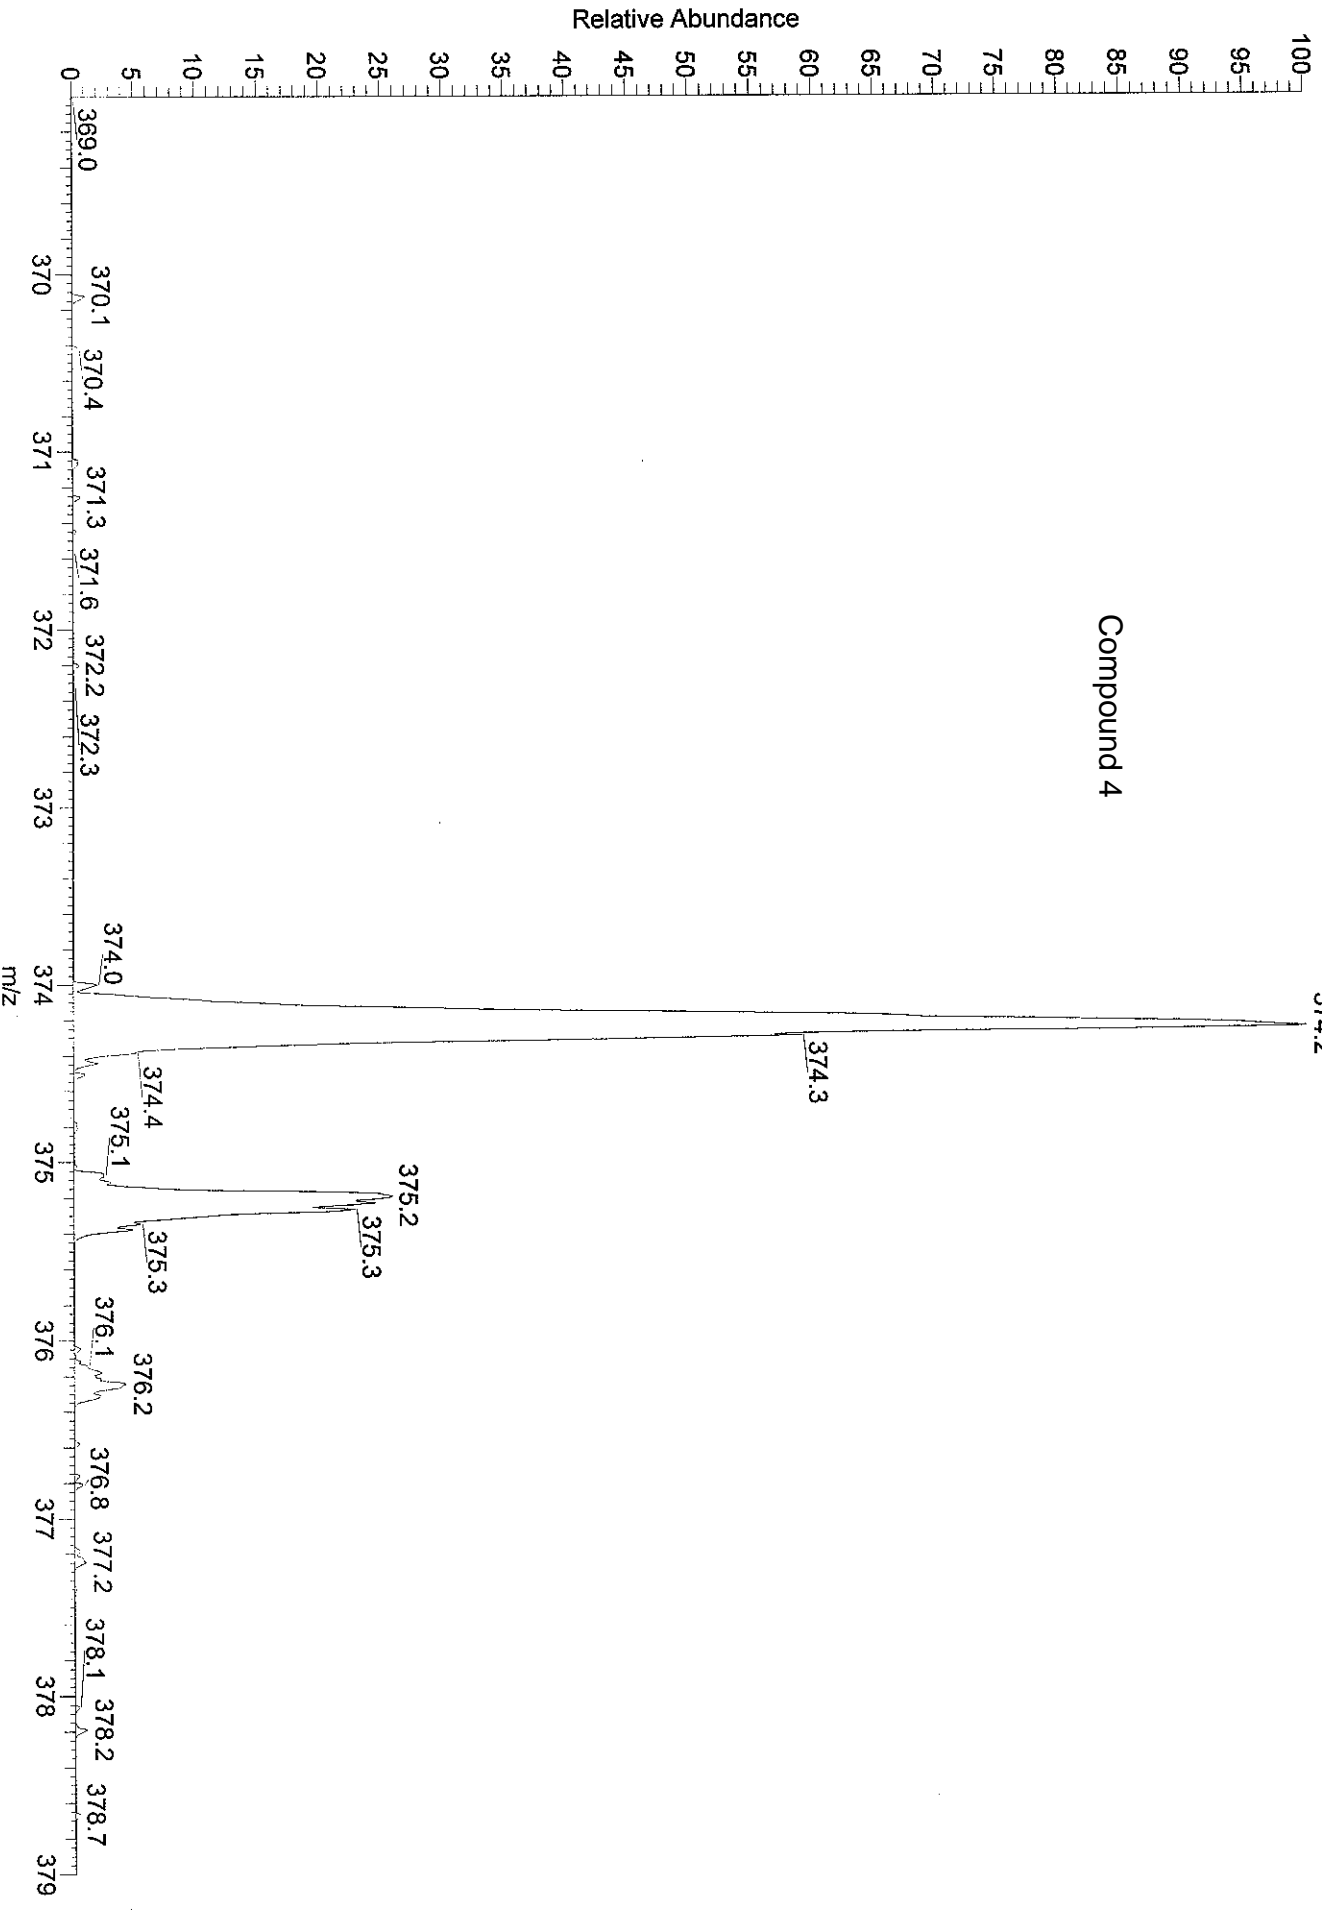

VB\_48 #20-22 RT: 0.53-0.60 AV: 3 NL: 4.85E6  
T: + p Full ms2 374.90@28.00 [100.00-2000.00]

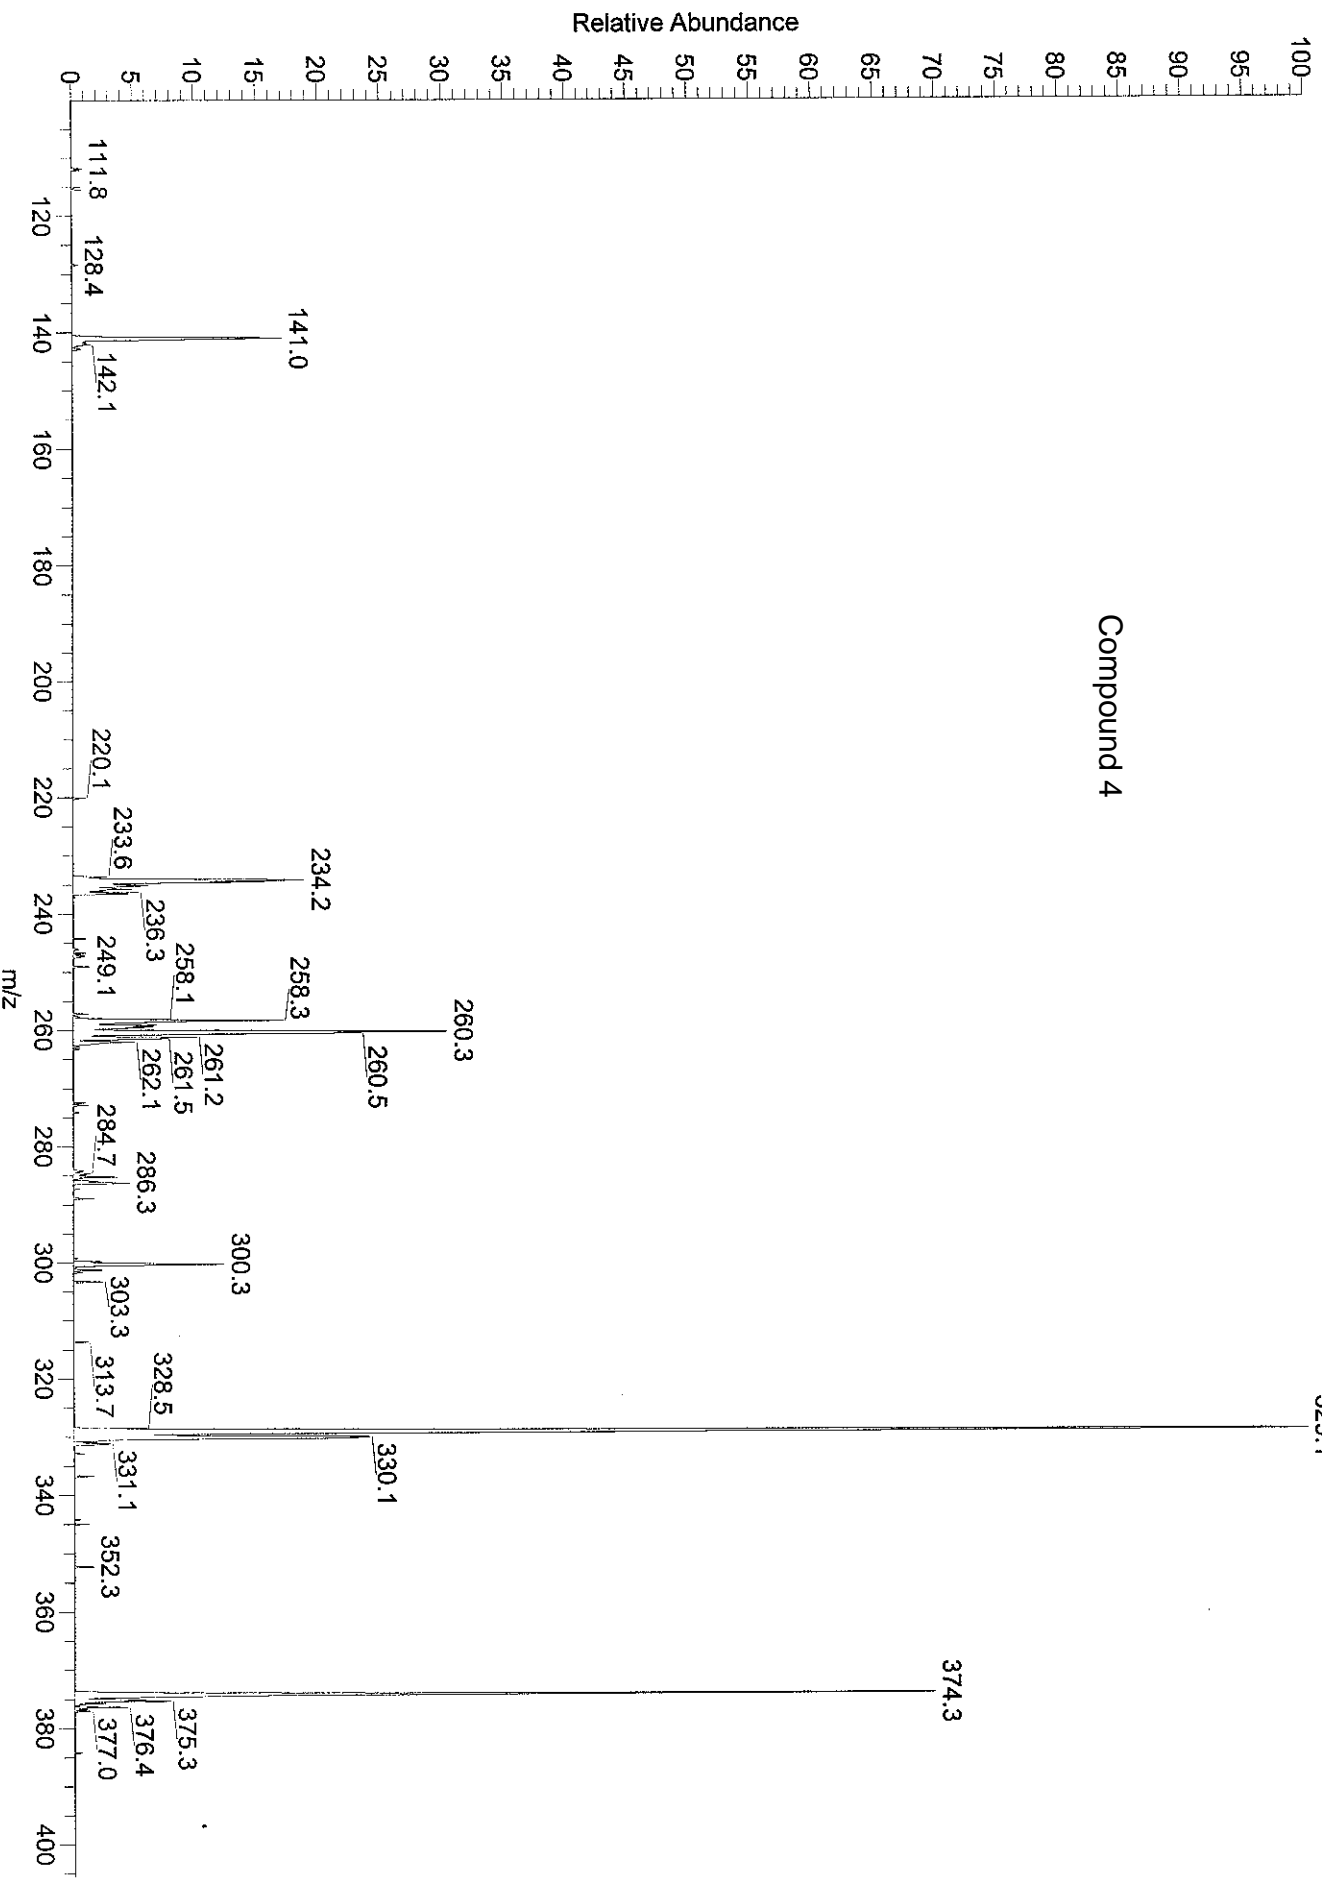

## Generic Display Report

## Analysis Info

Analysis Name D:\DATA\Facility\_May\_5\VB\_48\_000002.d  
Method ESI\_101506  
Sample Name VB-48  
Comment Venkat B., MeOH:H2O:AcOH

Acquisition Date 5/27/2008 1:27:56 PM

Operator Administrator  
Instrument apex-Qe

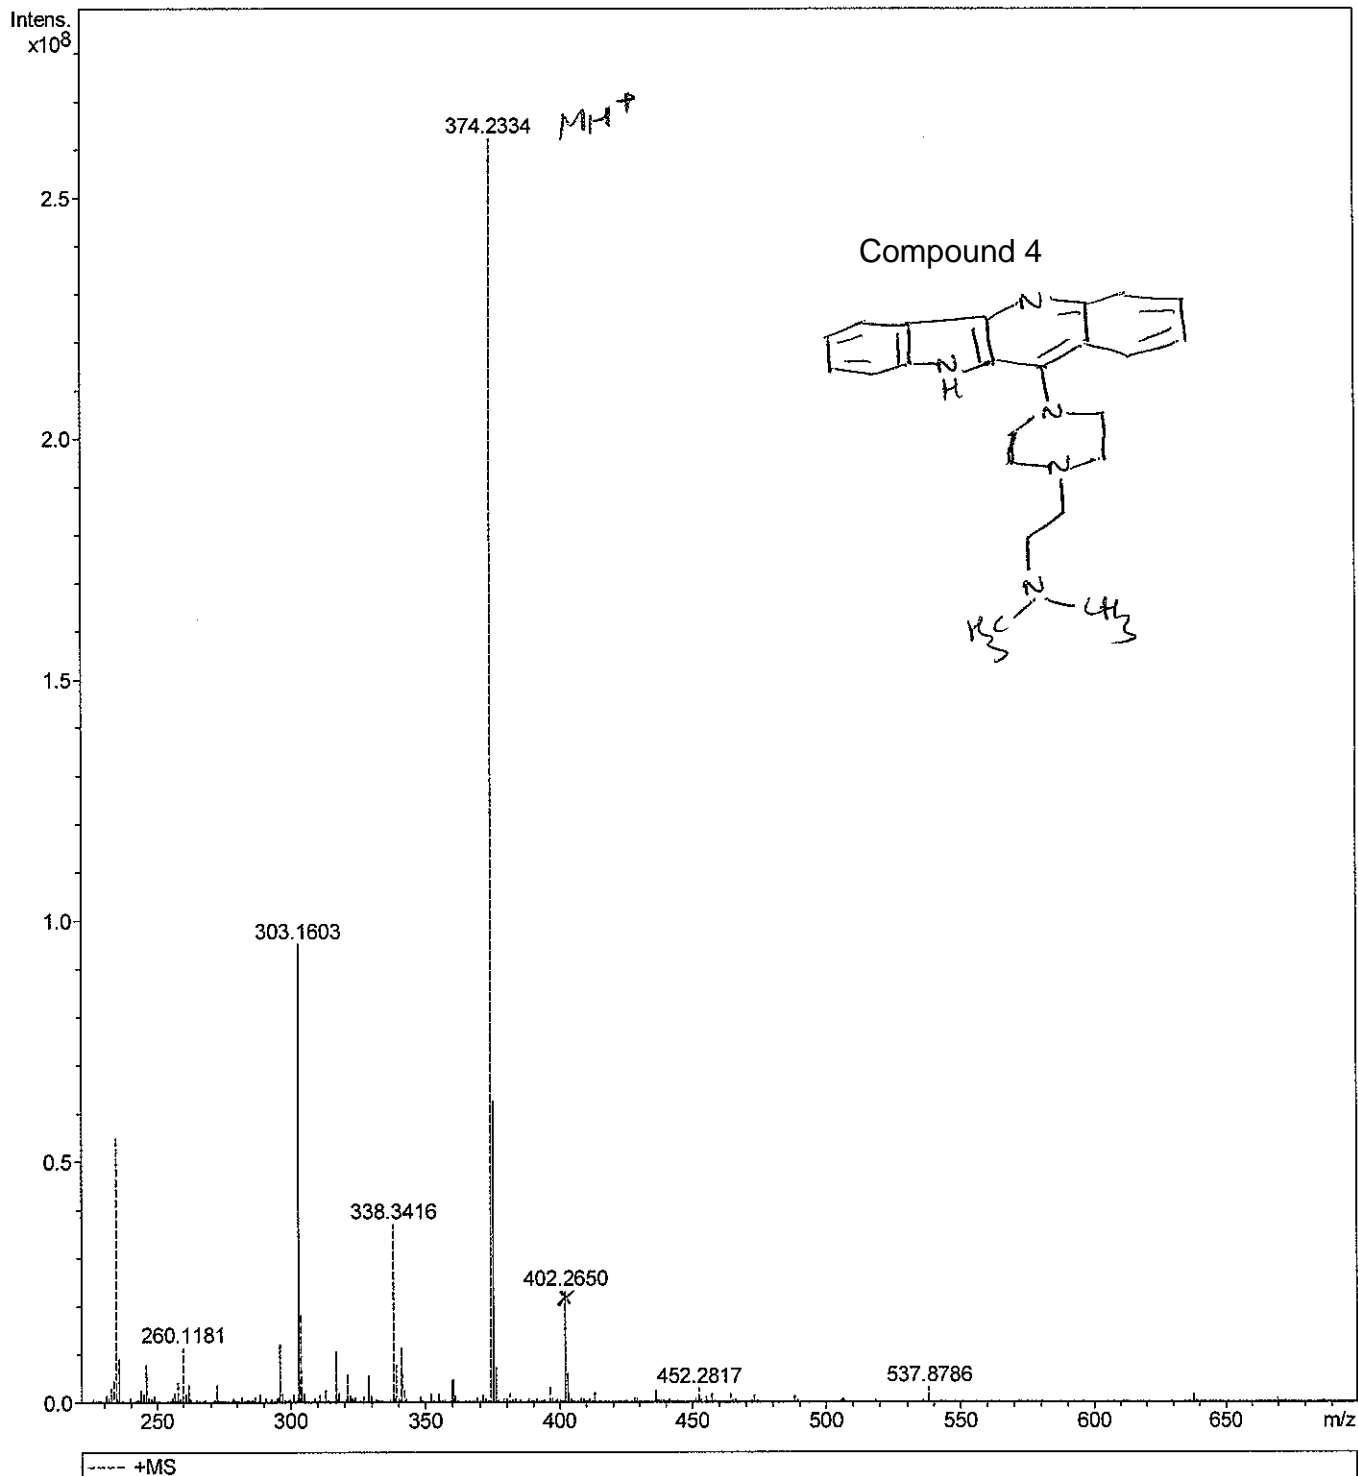

## Generic Display Report

## Analysis Info

Analysis Name D:\DATA\Facility\_May\_5\VB\_48\_000002.d  
Method ESI\_101506  
Sample Name VB-48  
Comment Venkat B., MeOH:H2O:AcOH

Acquisition Date 5/27/2008 1:27:56 PM

Operator Administrator  
Instrument apex-Qe

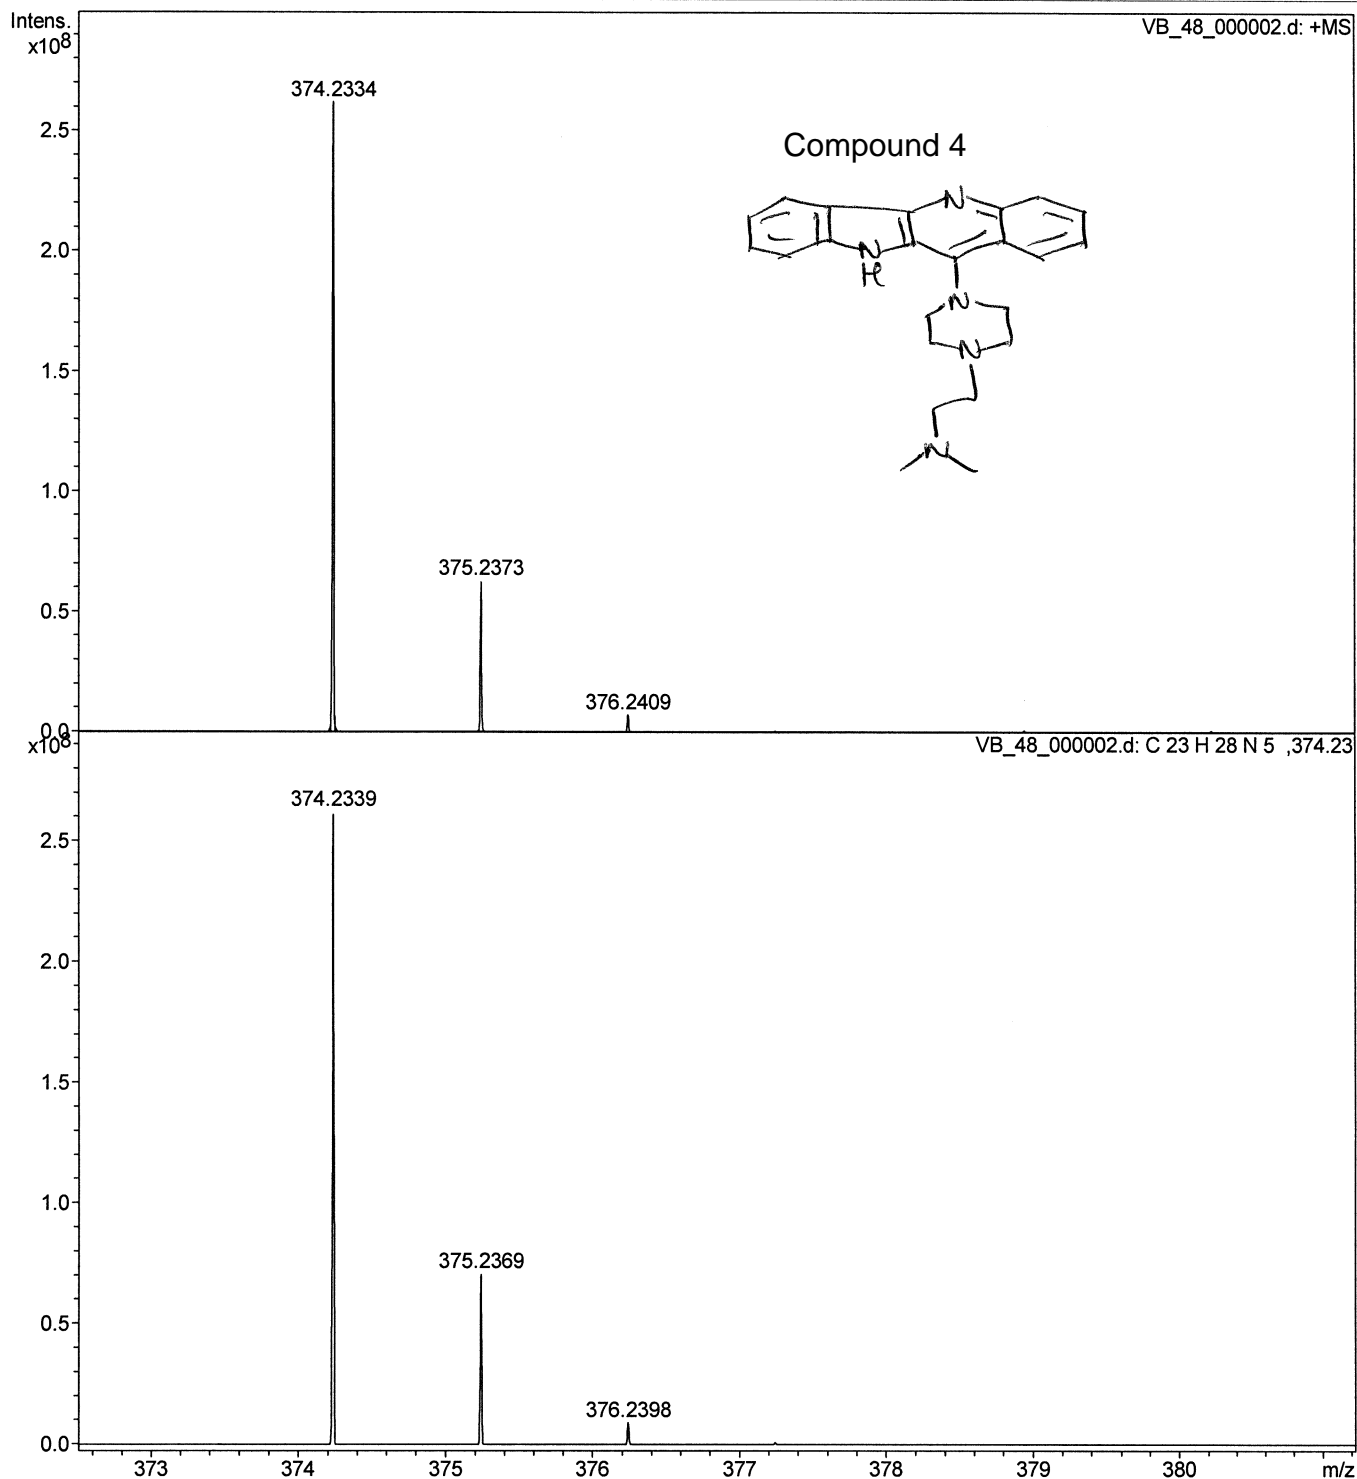

**Generate Molecular Formula** ? X

Min

Max

Note: for m < 2000 the elements C, H, N, and O are considered implicitly.

Measured m/z  Tolerance  mDa Charge

| # | Mol. Formula      | m/z      | err [mDa] | err  [ppm] | err [ppm] | mean err [ppm] |
|---|-------------------|----------|-----------|------------|-----------|----------------|
| 1 | C 22 H 32 N 1 O 4 | 374.2326 | -0.82     | 2.2        | -2.2      | -2.6           |
| 2 | C 23 H 28 N 5     | 374.2339 | 0.52      | 1.4        | 1.4       | 0.7            |
| 3 | C 25 H 30 N 2 O 1 | 374.2353 | 1.86      | 5.0        | 5.0       | 4.5            |

Compound 4

Automatically locate monoisotopic peak Maximum number of formulas

Check rings plus double bonds Minimum  Maximum

Apply nitrogen rule Electron configuration

Filter H/C element ratio Minimum H/C  Maximum H/C

Estimate carbon number  Generate immediately

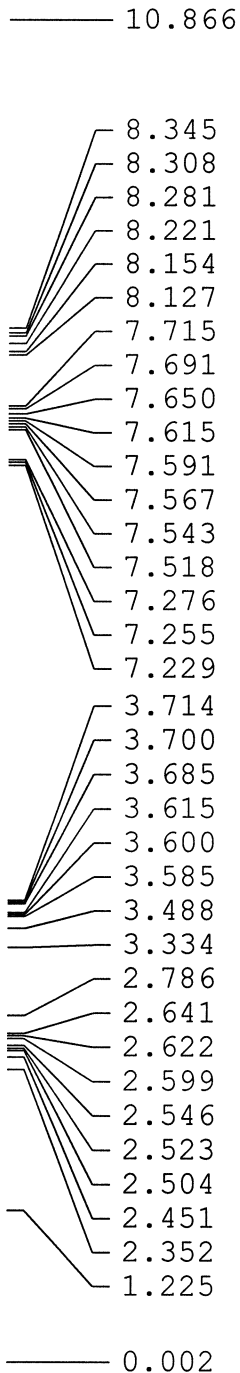

Compound 5

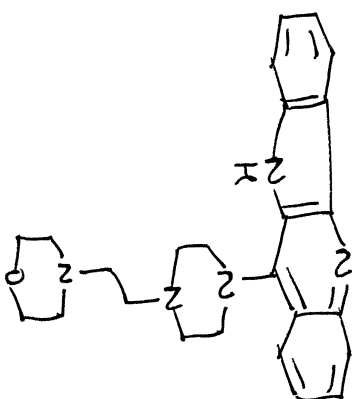

VB-GSA-189

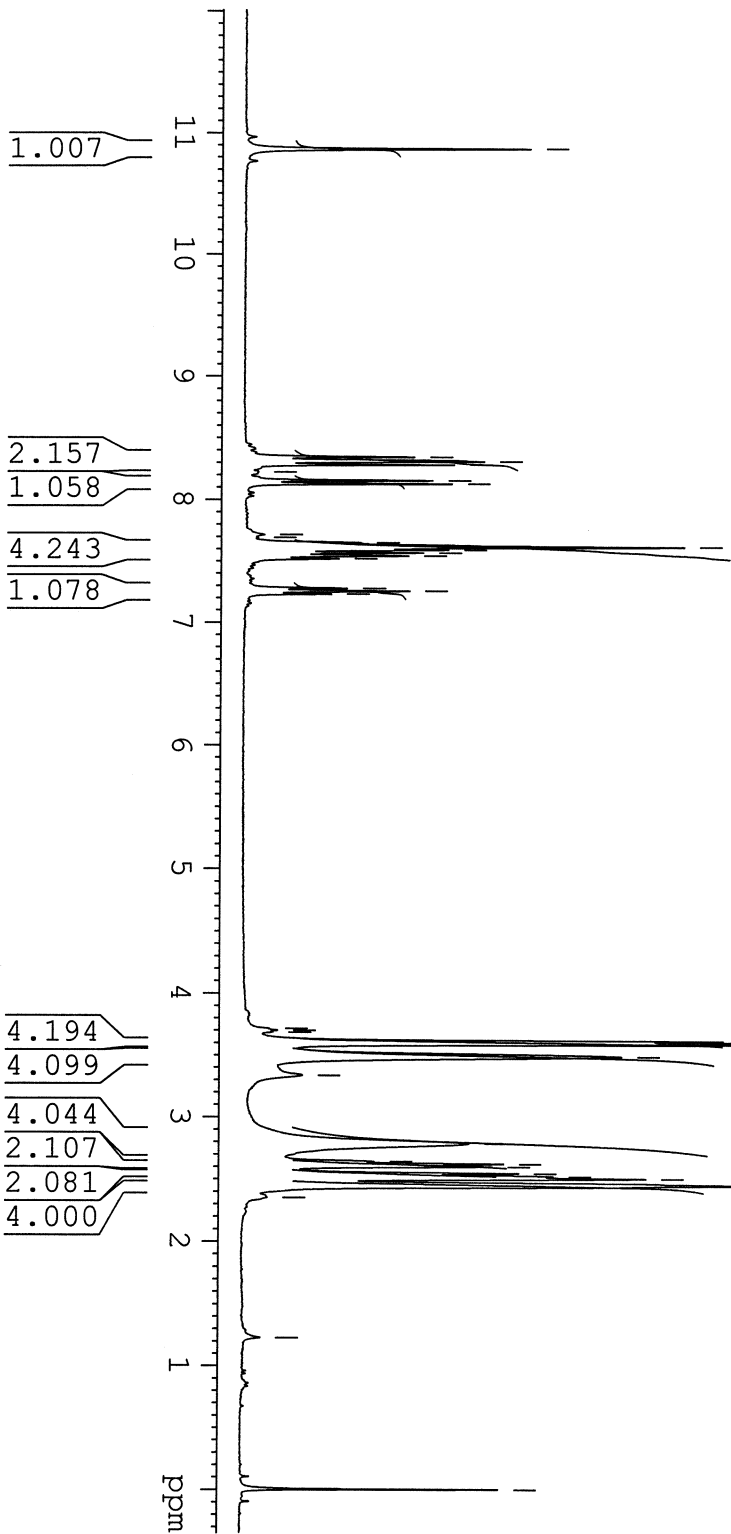

Current Data Parameters  
 NAME VB-GSA-189  
 EXPNO 9  
 PROCNO 1

F2 - Acquisition Parameters  
 Date\_ 20090730  
 Time 15.26  
 INSTRUM spect  
 PROBHD 5 mm QNP 1H/1  
 PULPROG zg30  
 TD 2930  
 FIDRES 65536  
 SOLVENT DMSO  
 NS 64  
 DS 2  
 SWH 6172.839 Hz  
 FIDRES 0.094190 Hz  
 AQ 5.3084660 sec  
 RG 456.1  
 DW 81.000 usec  
 DE 6.00 usec  
 TE 300.0 K  
 D1 1.00000000 sec

==== CHANNEL f1 =====  
 NUC1 1H  
 P1 9.25 usec  
 PL1 0.00 dB  
 SF01 300.1318534 MHz

F2 - Processing parameters  
 SI 32768  
 SF 300.1300000 MHz  
 WDW EM  
 SSB 0  
 LB 0.30 Hz  
 GB 0  
 PC 1.00

- 148.192
- 145.836
- 144.826
- 136.738
- 130.288
- 129.915
- 127.252
- 126.998
- 125.088
- 124.299
- 124.134
- 122.123
- 121.930
- 120.198
- 112.903

Compound 5

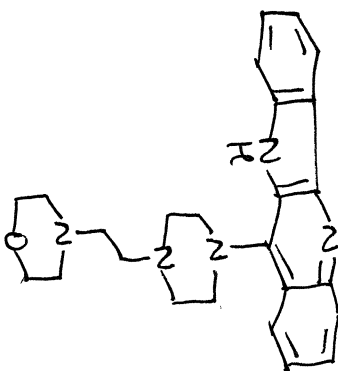

VB-GSA-189

- 67.106
- 56.780
- 56.163
- 54.801
- 54.611
- 51.564
- 41.235
- 40.957
- 40.679
- 40.400
- 40.122
- 39.844
- 39.565

0.969

Current Data Parameters  
 NAME VB-GSA-189  
 EXPNO 10  
 PROCNO 1

F2 - Acquisition Parameters  
 Date\_ 20090731  
 Time 7.35

INSTRUM spect  
 PROBHD 5 mm QNP 1H/1  
 PULPROG zgpg30  
 TD 65536  
 SOLVENT GDC13  
 NS 15000  
 DS 4  
 SWH 17985.611 Hz  
 FIDRES 0.274439 Hz  
 AQ 1.8219508 sec  
 RG 512  
 DW 27.800 usec  
 DE 6.00 usec  
 TE 300.0 K  
 D1 2.00000000 sec  
 d11 0.03000000 sec  
 d12 0.00002000 sec

CHANNEL f1  
 NUC1 13C  
 P1 6.00 usec  
 PL1 2.00 dB  
 SFO1 75.4752653 MHz

CHANNEL f2  
 CPDPRG2 waltz16  
 NUC2 1H  
 PCPD2 90.00 usec  
 PL2 0.00 dB  
 PLI2 20.00 dB  
 PLI3 20.00 dB  
 SFO2 300.1312005 MHz

F2 - Processing parameters  
 SI 32768  
 SF 75.4677190 MHz  
 WDM EM  
 SSB 0  
 LB 1.00 Hz  
 GB 0  
 PC 1.00

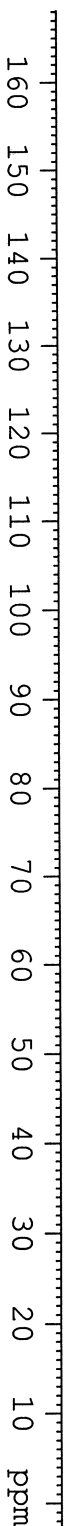



S33

=====  
 Injection Date : 8/4/2009 5:51:38 PM  
 Sample Name : VB-GSA-189 Location : Vial 17  
 Acq. Operator : Karen Inj : 1  
 Acq. Instrument : Instrument 1 Inj Volume : 0.1 µl  
 Method : C:\HPCHEM\1\METHODS\LC\_MS.M  
 Last changed : 8/4/2009 5:50:35 PM by Karen  
 Zorbax SB ODS,20:80:0.25; MeCN/water/formicA, POS, 300-550; frag 100; 30C, cap volt 3000,  
 gas temp 325

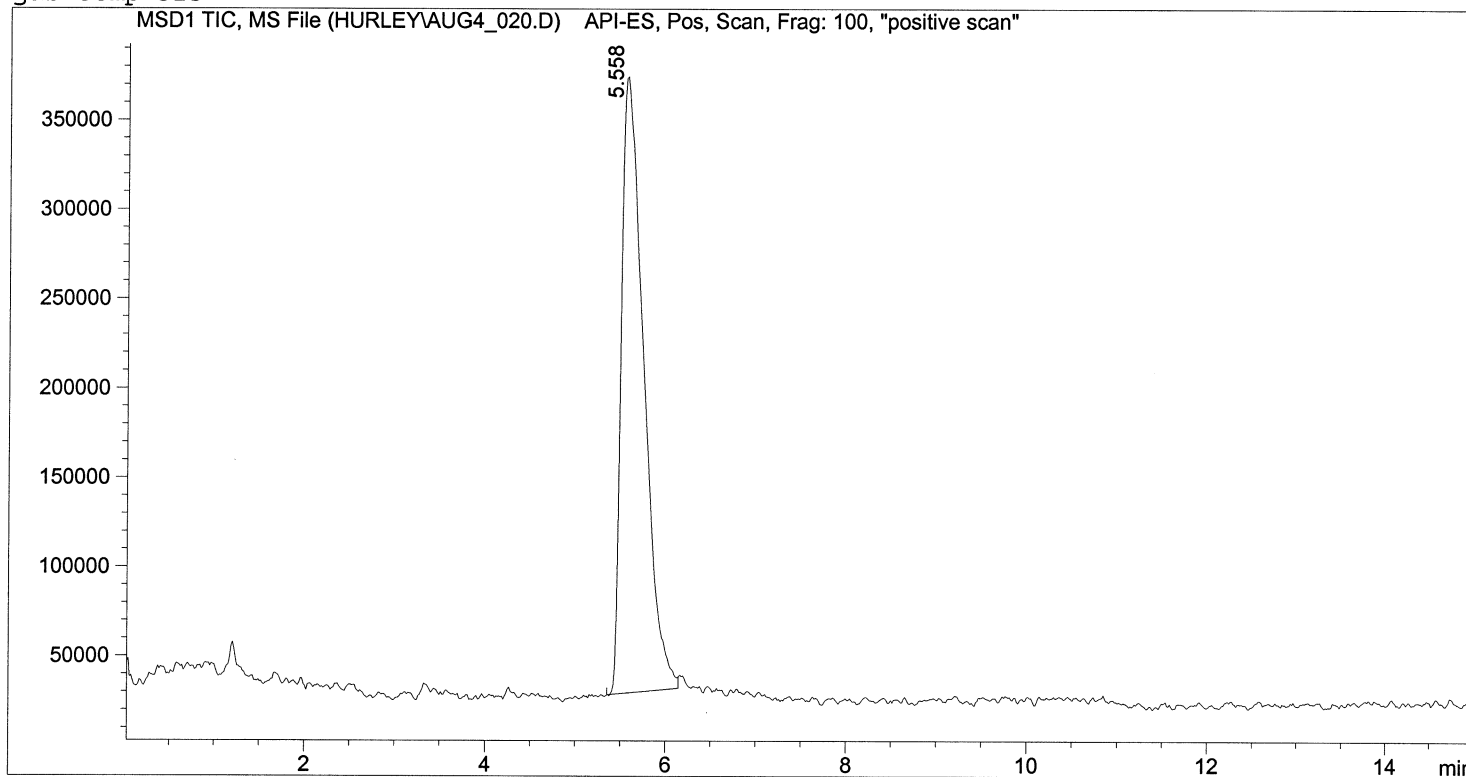

=====  
 Area Percent Report  
 =====

Sorted By : Signal  
 Multiplier : 1.0000  
 Dilution : 1.0000  
 Use Multiplier & Dilution Factor with ISTDs

Signal 1: MSD1 TIC, MS File

| Peak # | RetTime [min] | Type | Width [min] | Area      | Height    | Area %   |
|--------|---------------|------|-------------|-----------|-----------|----------|
| 1      | 5.558         | BB   | 0.2325      | 5.91404e6 | 3.45798e5 | 100.0000 |

Totals :                                    5.91404e6    3.45798e5

=====  
 \*\*\* End of Report \*\*\*

Compound 5

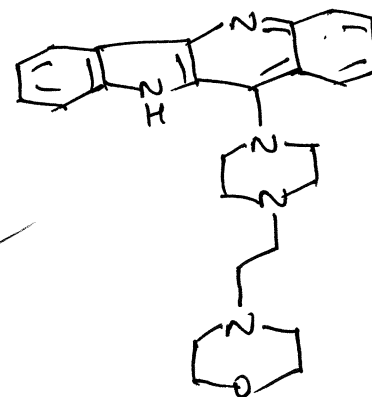

VB-GSA-189  
 (m/z = 415)

Injection Date : 8/4/2009 5:51:38 PM  
Sample Name : VB-GSA-189 Location : Vial 17  
Acq. Operator : Karen Inj : 1  
Acq. Instrument : Instrument 1 Inj Volume : 0.1  $\mu$ l  
Method : C:\HPCHEM\1\METHODS\LC\_MS.M  
Last changed : 8/4/2009 5:50:35 PM by Karen  
Zorbax SB ODS,20:80:0.25; MeCN/water/formicA, POS, 300-550; frag 100; 30C, cap volt 3000, gas temp 325

Current Chromatogram(s)

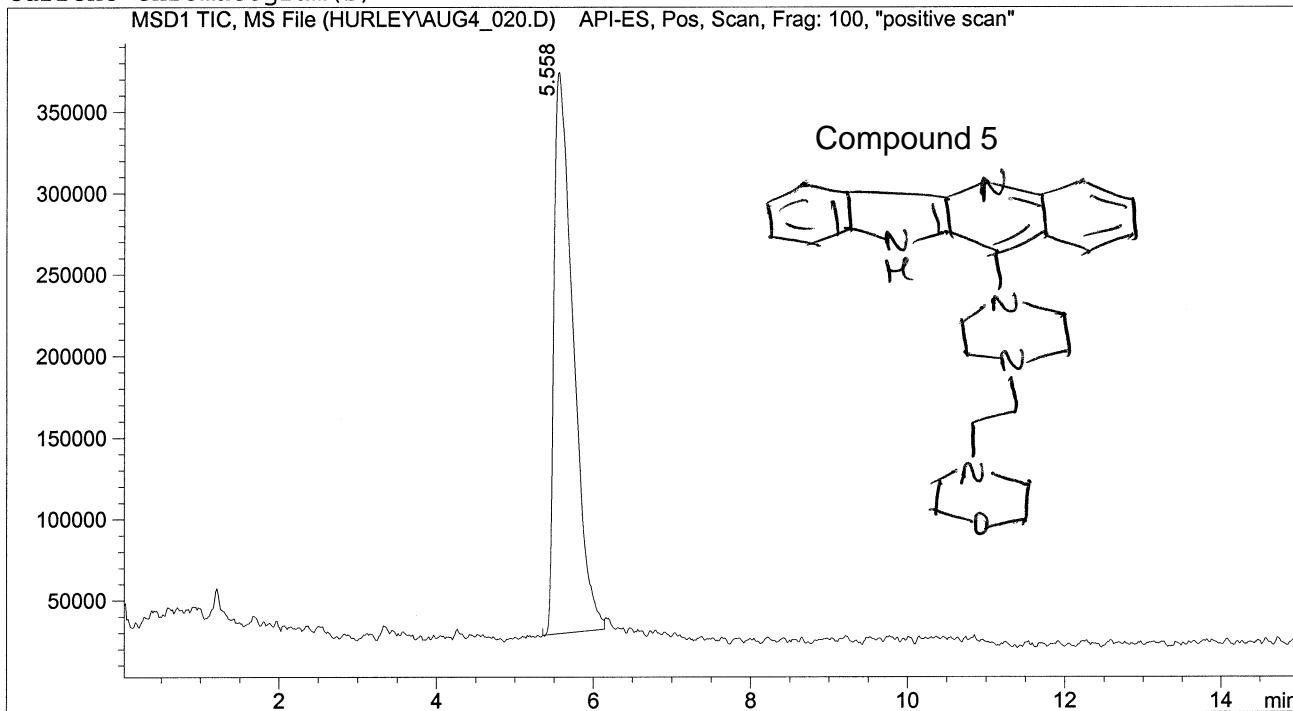

Apex Mass Spectrum of Peak 5.568 of AUG4\_020.D

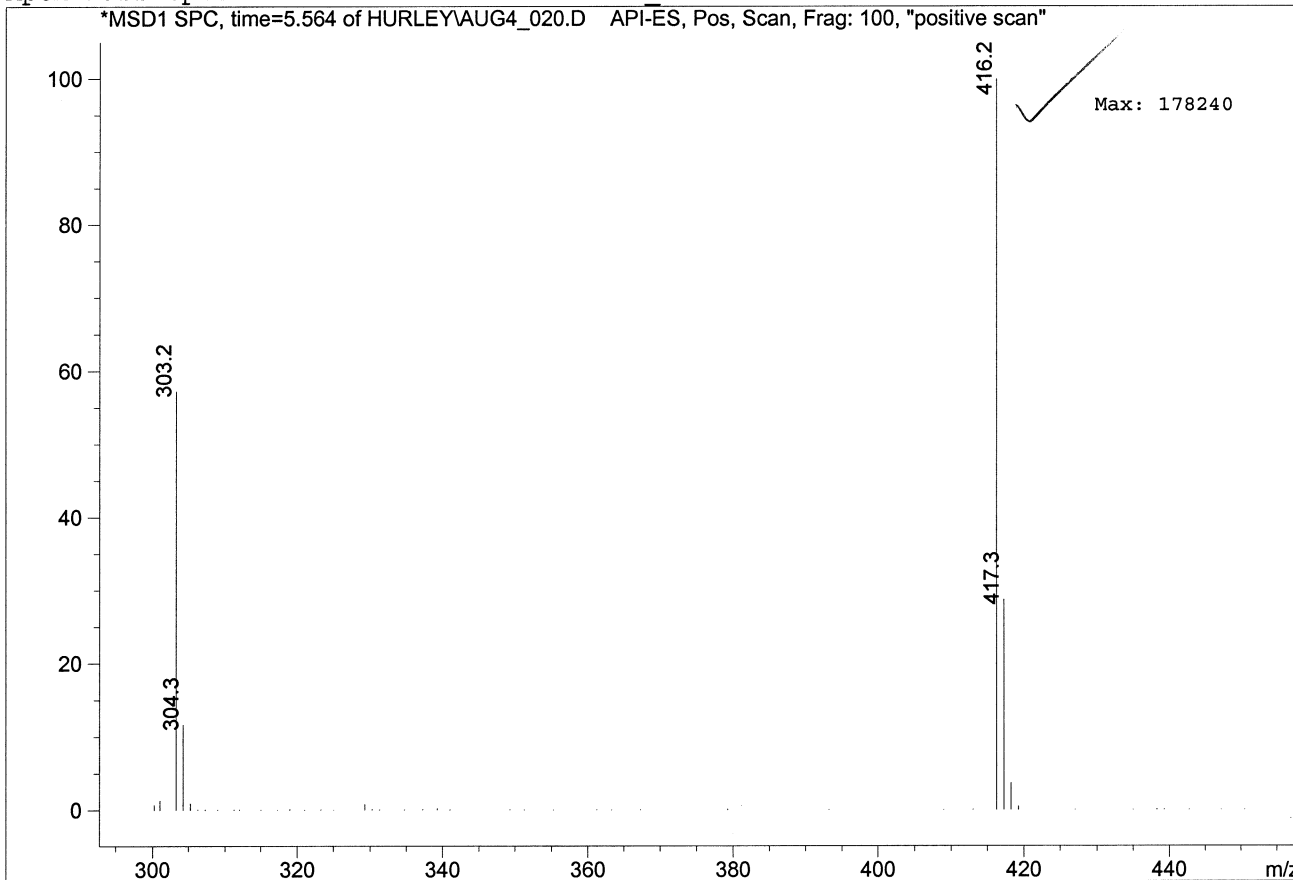

VB-GSA-189 #19-21 RT: 0.50-0.55 AV: 3 NL: 8.86E6  
T: + p Full ms [100.00-1500.00]

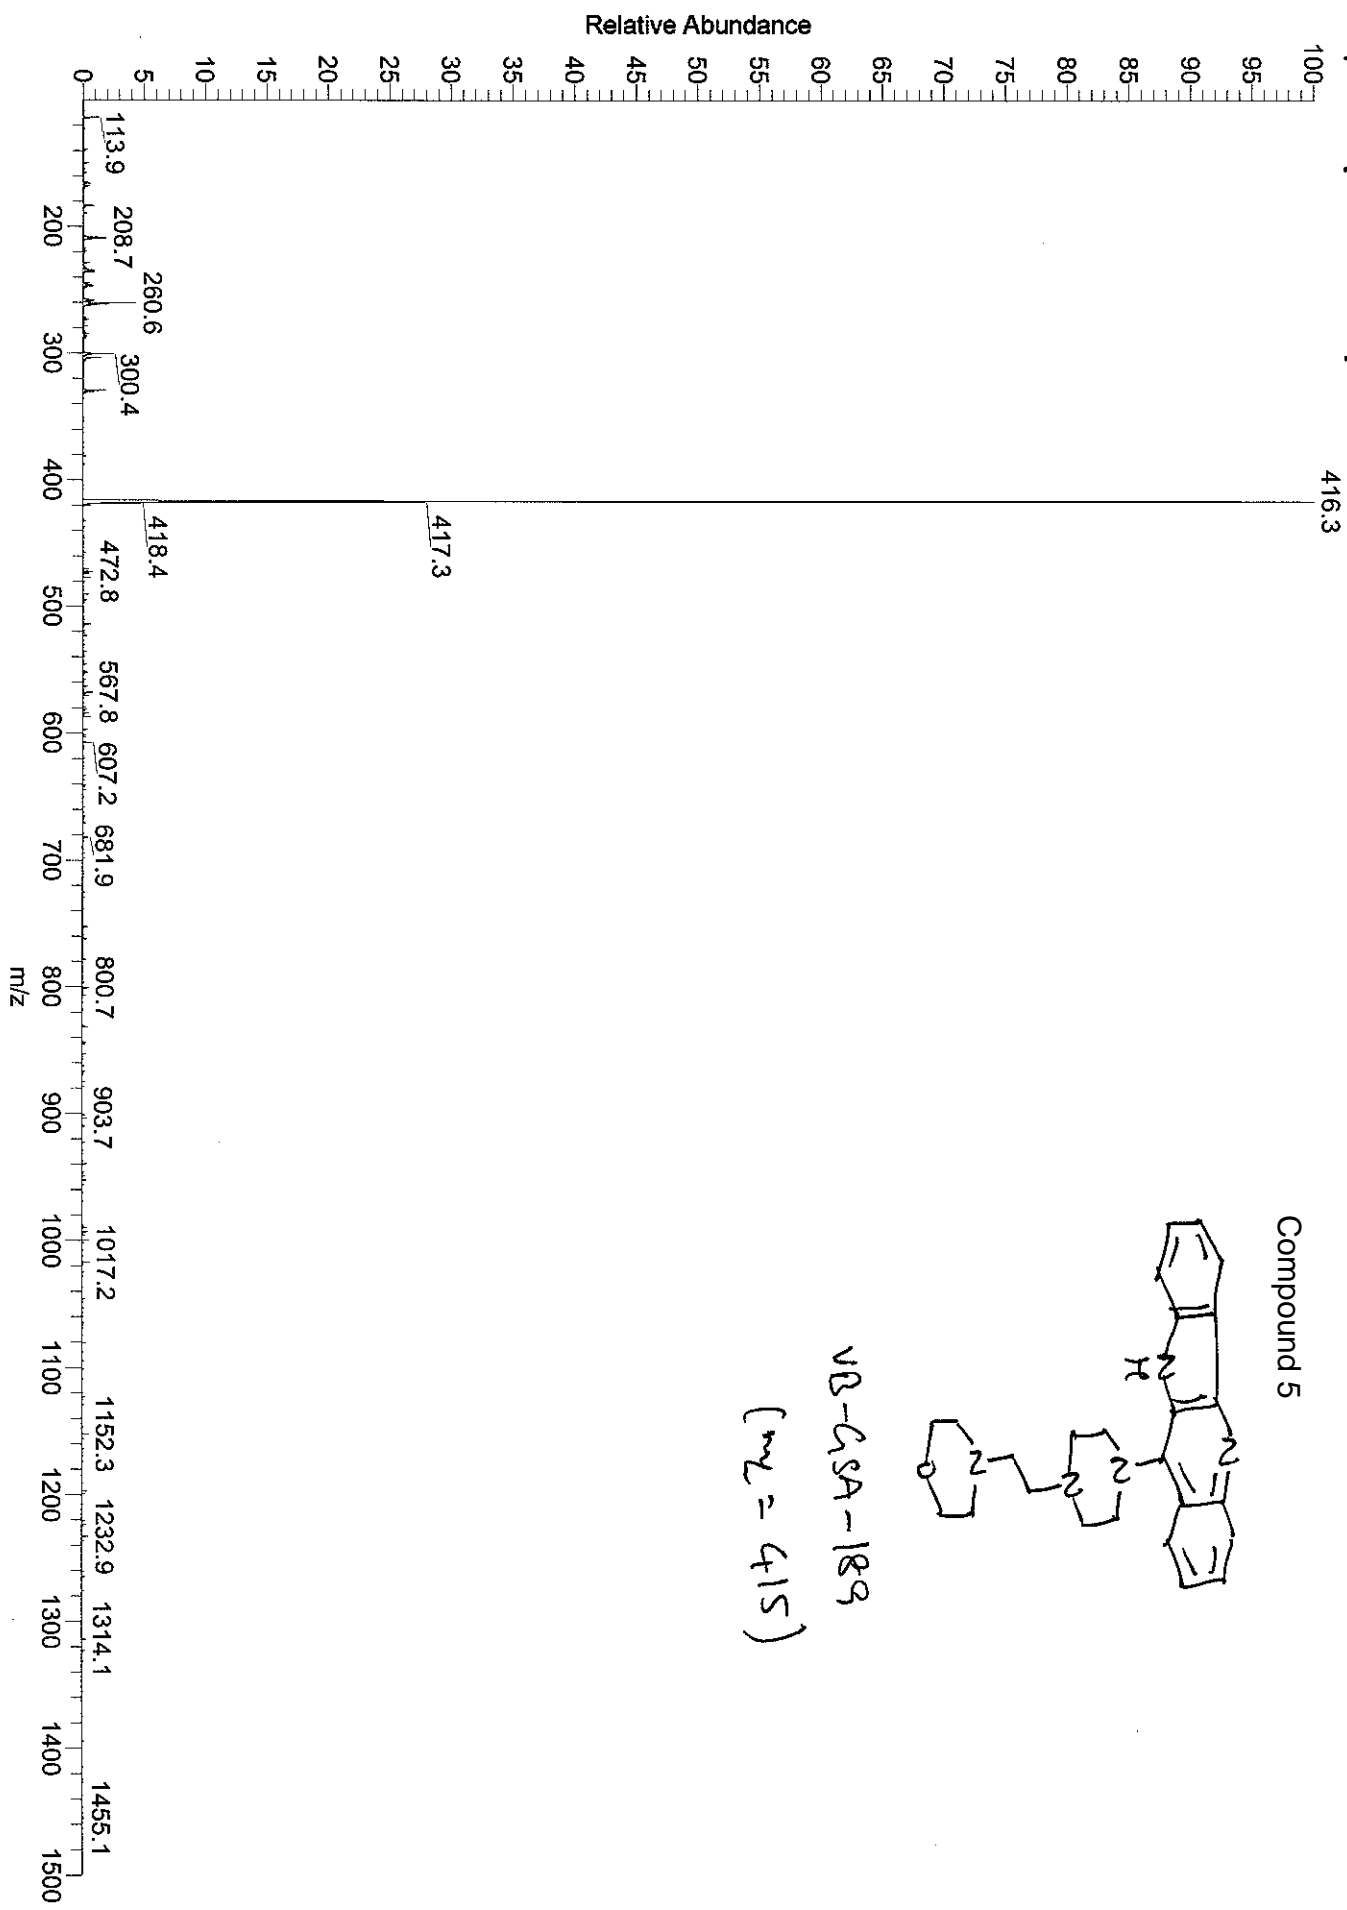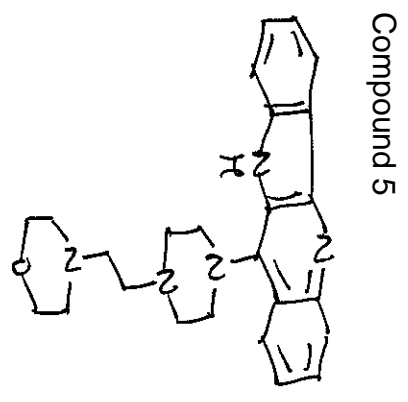

VB-GSA-189  
(m/z = 415)

VB-GSA-189 #19-21 RT: 0.50-0.55 AV: 3 NL: 8.86E6  
T: + p Full ms [100.00-1500.00]

Compound 5

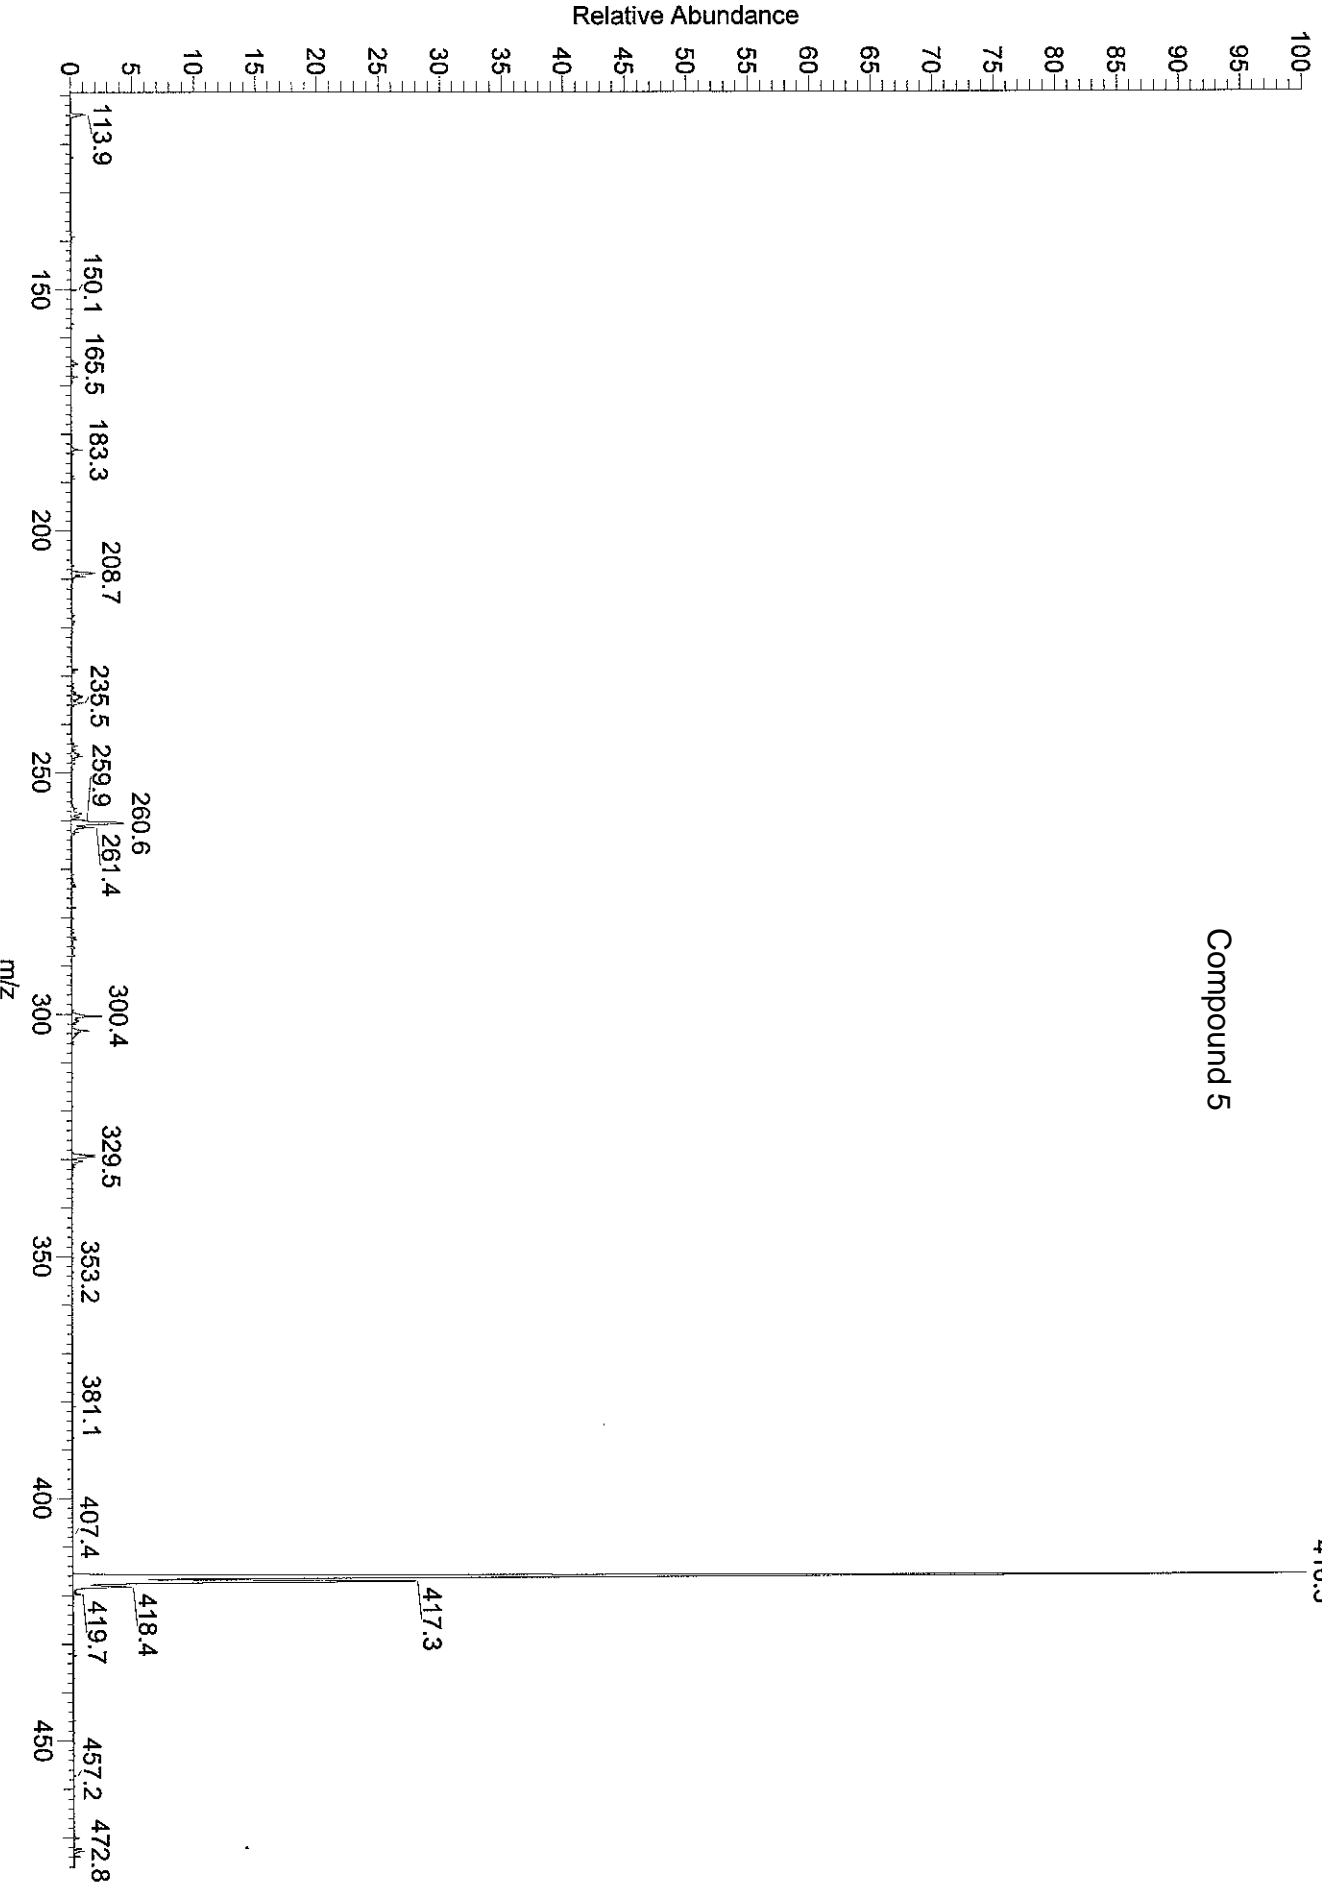

VB-GSA-189 #14-15 RT: 0.36-0.39 AV: 2 NL: 2.41E6  
T: + p Full ms2 416.00@30.00 [110.00-1500.00]

329.2

Compound 5

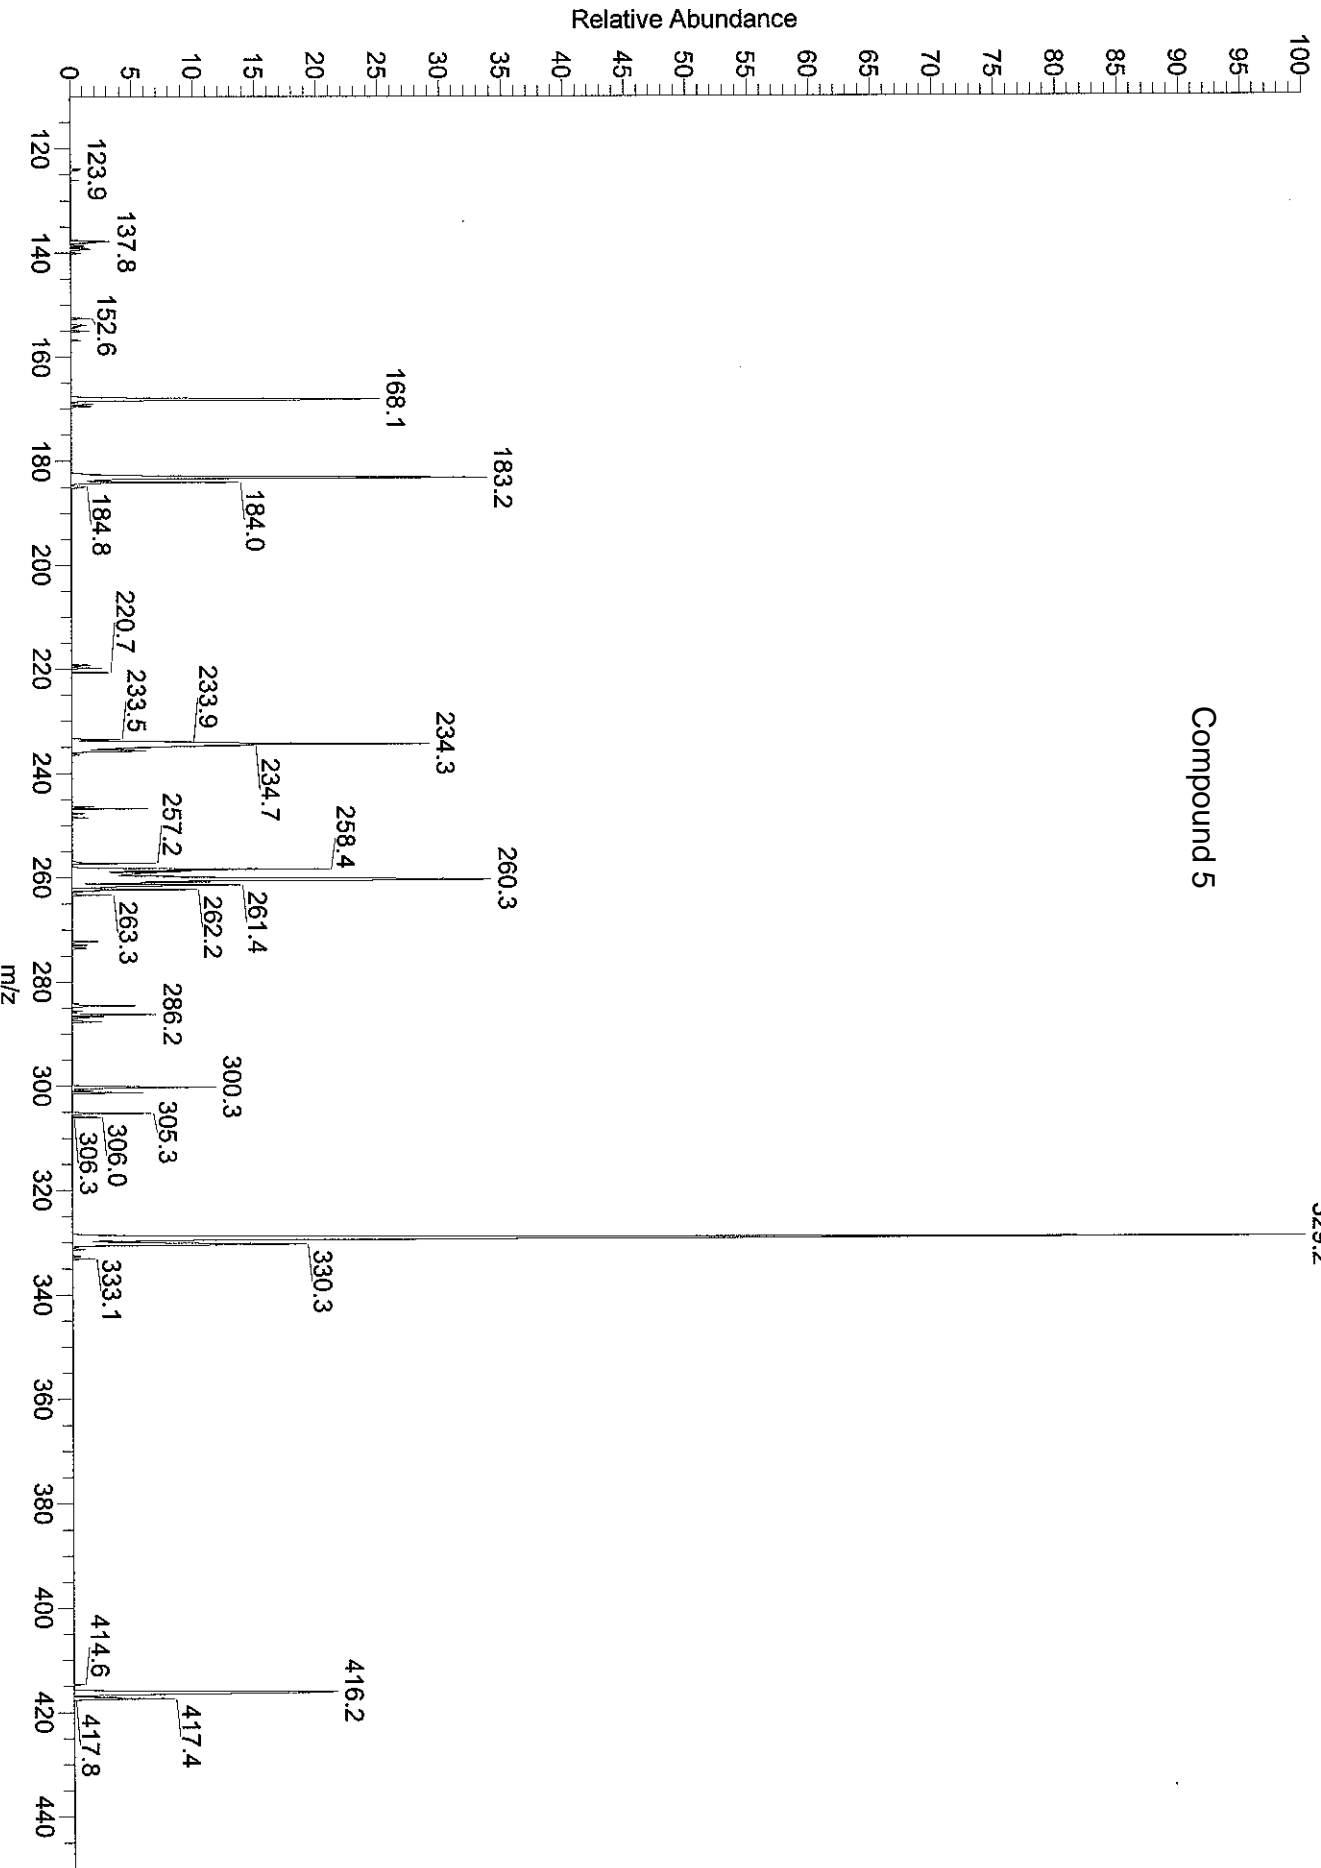

VB-GSA-189 #23-24 RT: 0.63-0.66 AV: 2 NL: 4.32E4  
8 T: - p Full ms [100.00-1500.00]

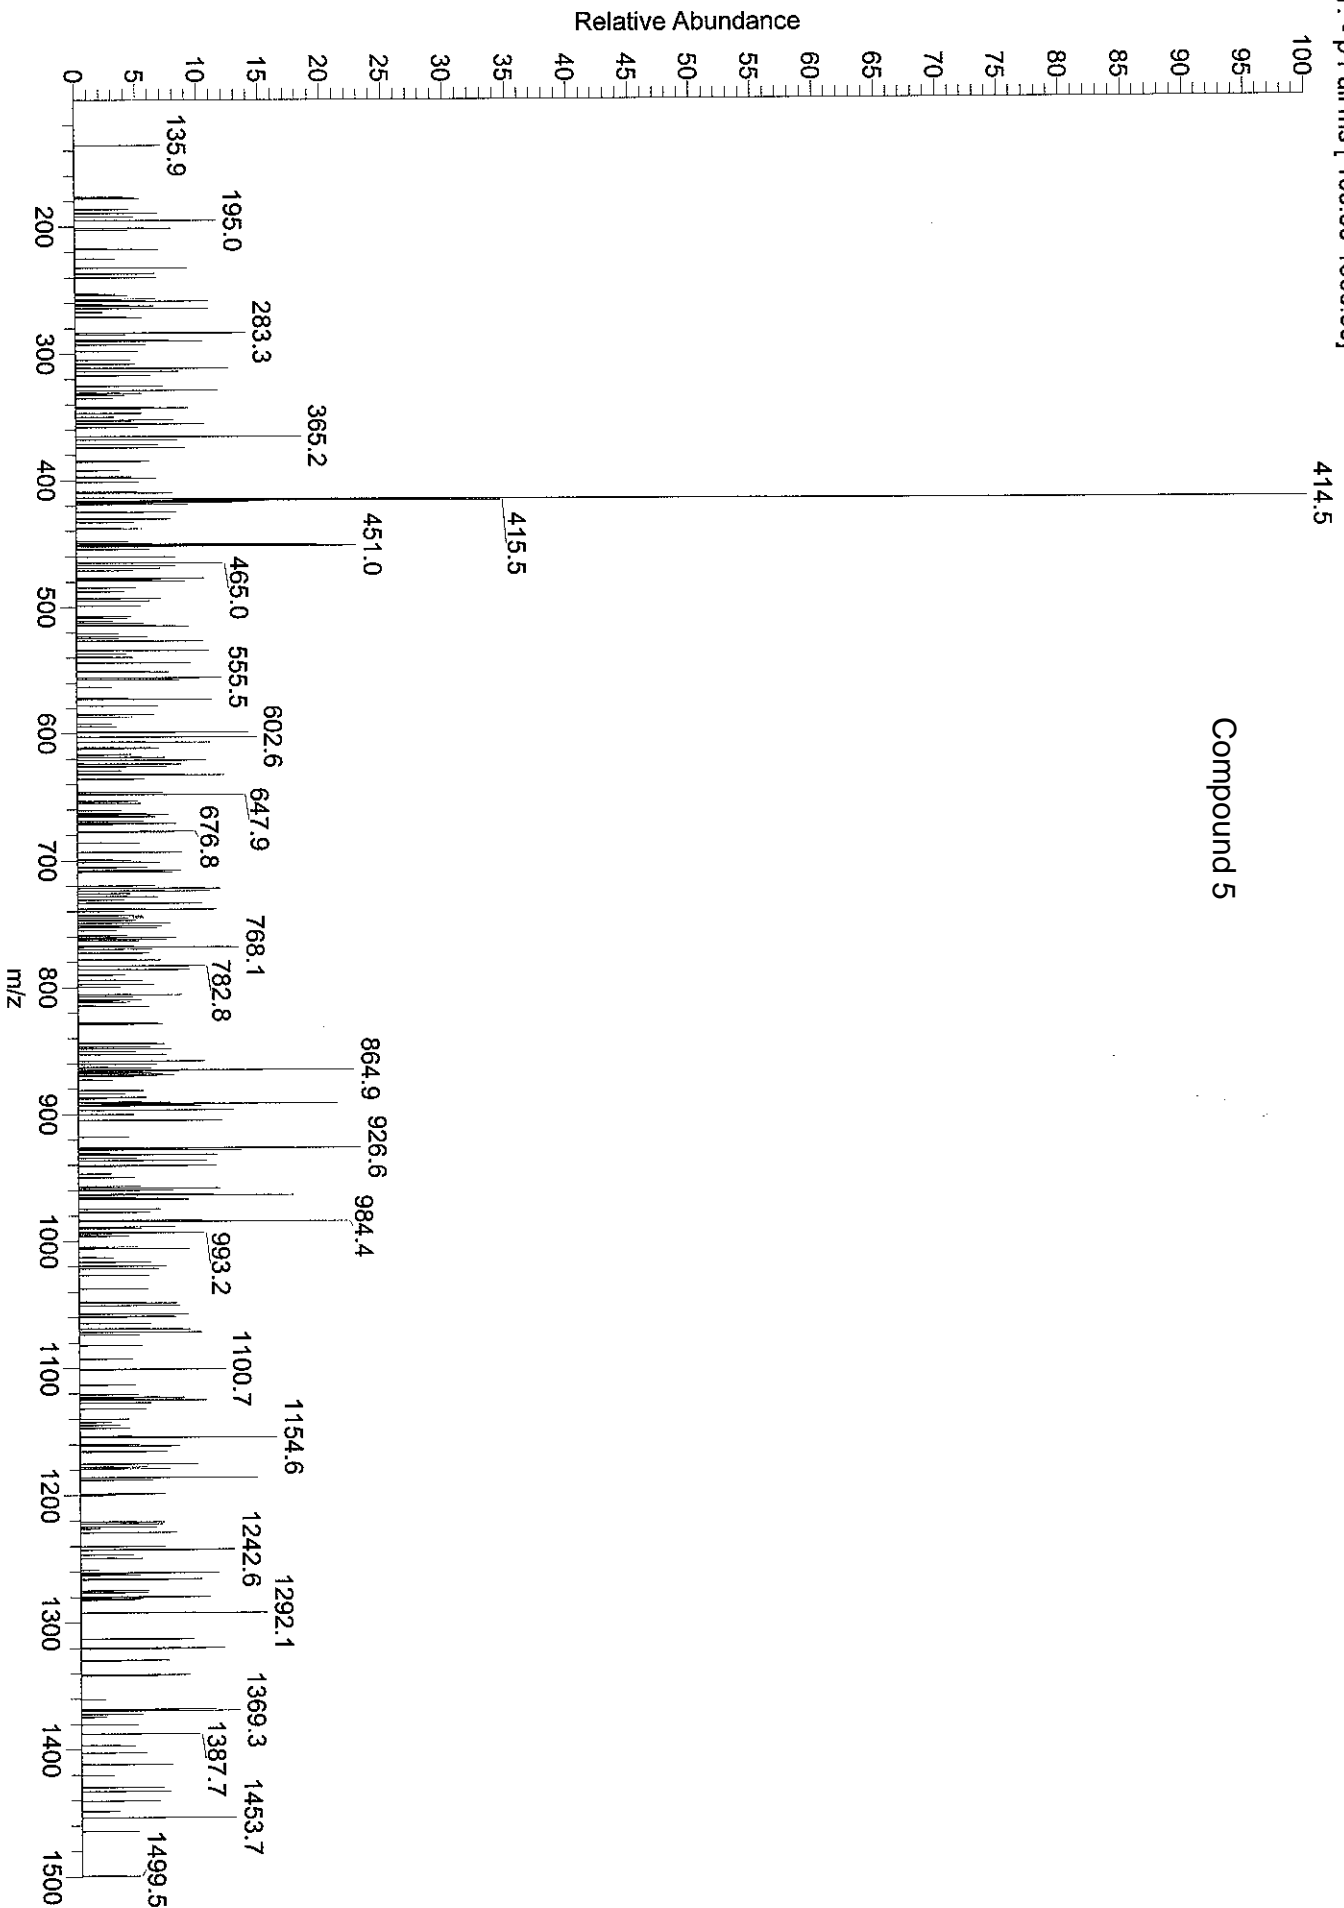

# Generic Display Report

## Analysis Info

Analysis Name D:\DATA\Facility\_August\_09\VB-GSA-189\_000002.d  
Method ESL\_101506  
Sample Name VB-GSA-189  
Comment Venkat B., MeOH:ACN 1:1

Acquisition Date 8/6/2009 2:44:45 PM  
Operator  
Instrument apex-Qe

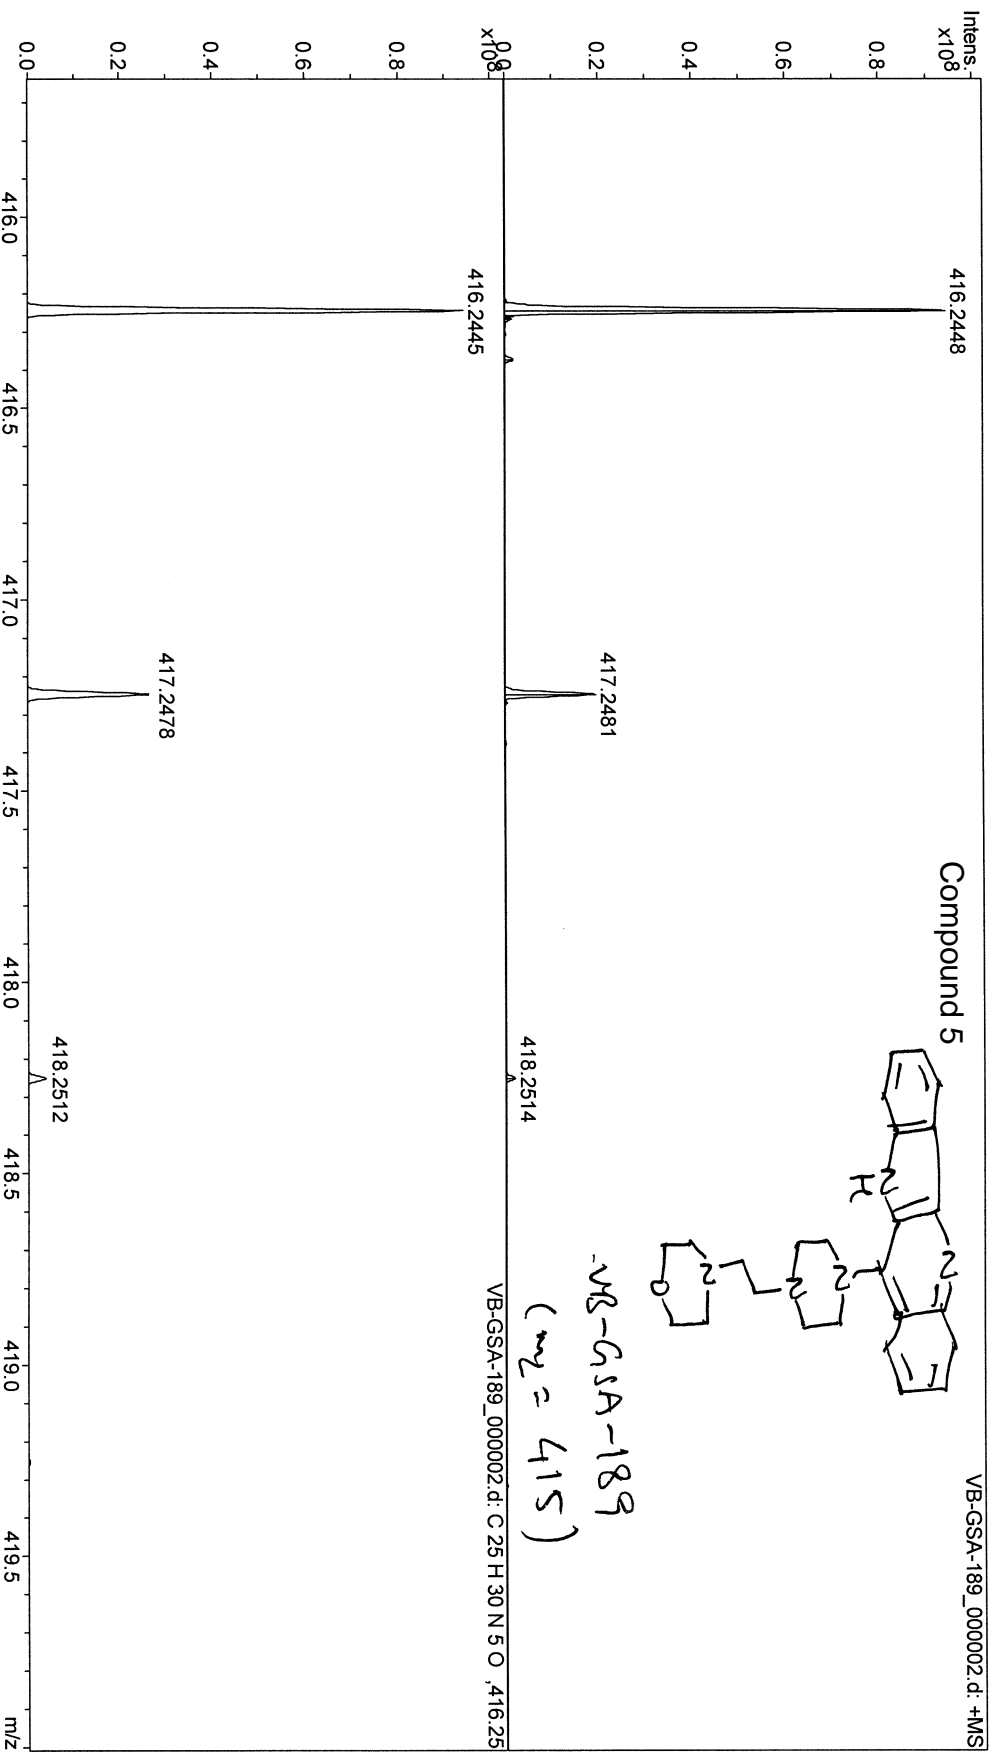

## SmartFormula Manually

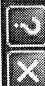

Min

C<sub>13</sub>

Generate

Max

C<sub>13</sub>-n

Help

Note: for m &lt; 2000 the elements C, H, N, and O are considered implicitly.

 Measured m/z  Tolerance  mDa  Charge 

| # | Mol. Formula                                                  | m/z      | err [mDa] | err  [ppm] | err [ppm] | mean err [ppm] | sigma | Sigma Rank | rdb  | N rule | e <sup>-</sup> |
|---|---------------------------------------------------------------|----------|-----------|------------|-----------|----------------|-------|------------|------|--------|----------------|
| 1 | C <sub>13</sub> H <sub>34</sub> N <sub>7</sub> O <sub>8</sub> | 416.2463 | 1.57      | 3.8        | 3.8       | 3.6            | 21.8  | 1          | 0.5  | ok     | even           |
| 2 | C <sub>24</sub> H <sub>34</sub> N <sub>5</sub> O <sub>5</sub> | 416.2431 | -1.62     | 3.9        | -3.9      | -3.9           | 36.9  | 2          | 8.5  | ok     | even           |
| 3 | C <sub>25</sub> H <sub>30</sub> N <sub>5</sub> O              | 416.2445 | -0.28     | 0.7        | -0.7      | -0.7           | 48.2  | 3          | 13.5 | ok     | even           |

Compound 5

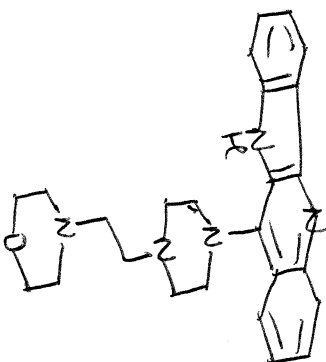
 Automatically locate monoisotopic peak  Maximum number of formulas

 Check rings plus double bonds  Minimum  Maximum

Electron configuration

even 
 Filter H/C element ratio  Minimum H/C  Maximum H/C

 Estimate carbon number  Generate immediately

Show Pattern



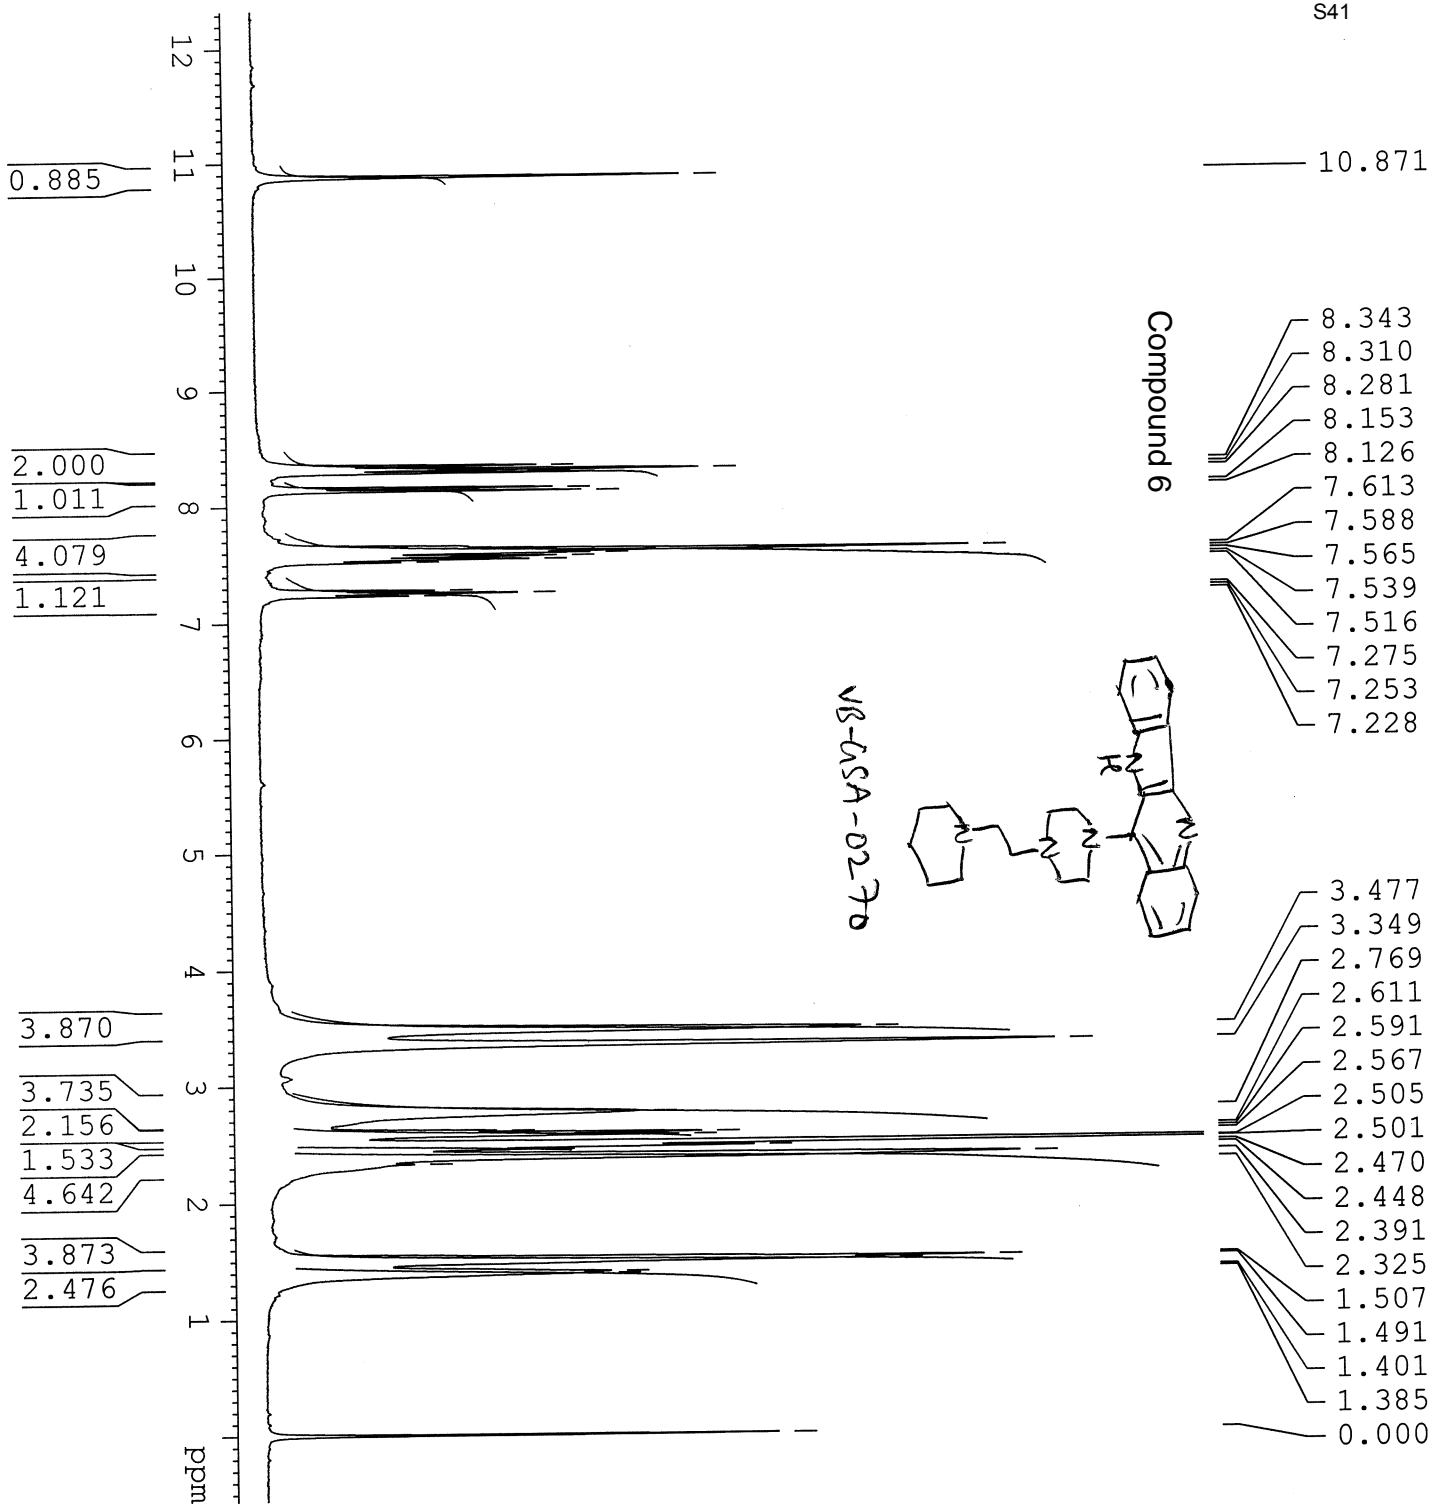

Current Data Parameters  
 NAME VB-0270 0270  
 EXPNO 656565  
 PROCNO 1

F2 - Acquisition Parameters  
 Date\_ 20100827  
 Time 14.25  
 INSTRUM spect  
 PROBD 5 mm QNP  
 PULPROG zg30  
 TD 65536  
 SOLVENT DMSO  
 NS 64  
 DS 2  
 SWH 6172.839 Hz  
 FIDRES 0.094190 Hz  
 AQ 5.3084660 sec  
 RG 287.4  
 DW 81.000 usec  
 DE 6.00 usec  
 TE 300.0 K  
 D1 1.00000000 sec

==== CHANNEL F1 =====  
 NUC1 1H  
 P1 8.50 usec  
 PL1 0.00 dB  
 SF01 300.131853 MHz  
 F2 - Processing parameters  
 SI 32768  
 SF 300.1300000 MHz  
 WDW EM  
 SSB 0  
 LB 0.30 Hz  
 GB 0  
 PC 1.00

- 148.189
- 145.834
- 144.825
- 136.745
- 130.277
- 129.906
- 127.249
- 126.990
- 125.076
- 124.296
- 124.134
- 122.119
- 121.929
- 120.189
- 112.903

Compound 6

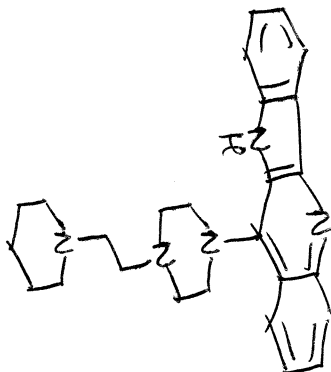

VB-GSA-0270

- 80.048
- 57.038
- 56.391
- 55.260
- 54.796
- 51.558
- 41.224
- 40.946
- 40.667
- 40.389
- 40.111
- 39.833
- 39.554
- 26.340
- 24.829

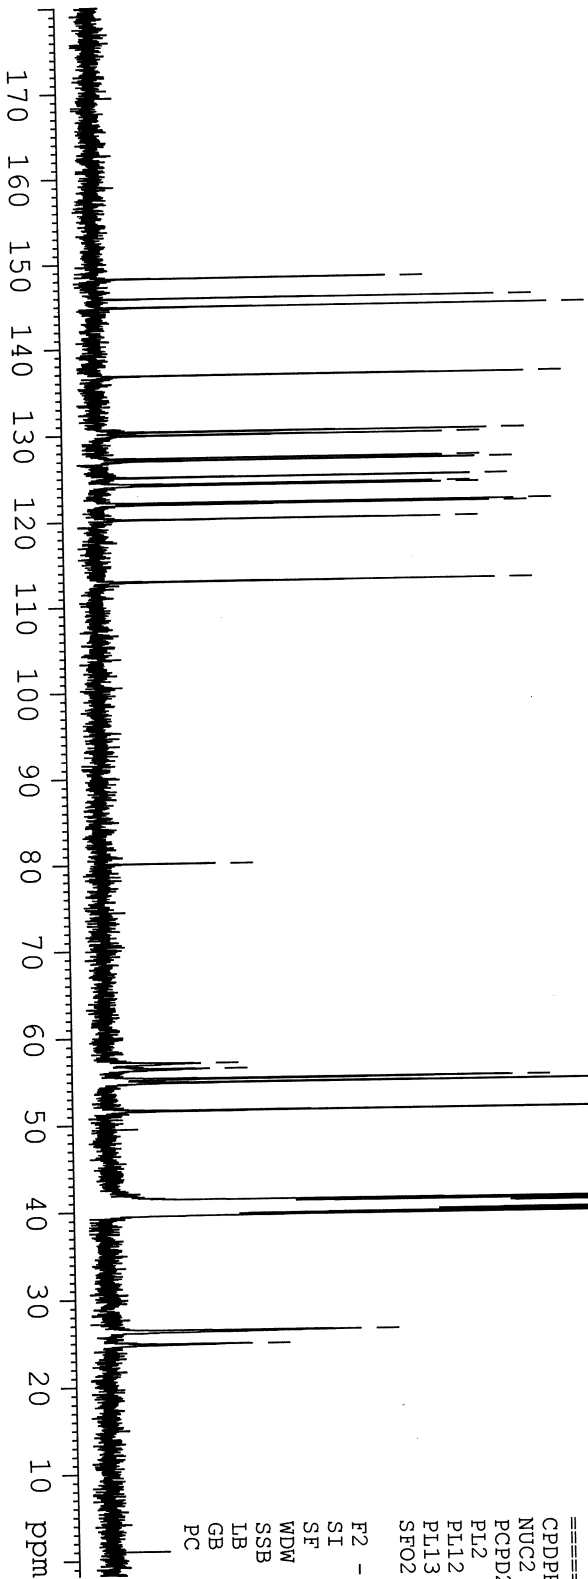

Current Data Parameters  
 NAME VB-0270  
 EXPNO 8768  
 PROCNO 1

F2 - Acquisition Parameters  
 Date\_ 20100917  
 Time\_ 9.45

INSTRUM spect  
 PROBHD 5 mm QNP 1H/1  
 PULPROG zgpg30  
 TD 65536  
 SOLVENT DMSO  
 NS 13349  
 DS 4

SWH 17985.611 Hz  
 FIDRES 0.274439 Hz  
 AQ 1.8219508 sec  
 RG 812.7  
 DW 27.800 usec  
 DE 6.00 usec  
 TE 300.0 K

D1 2.00000000 sec  
 d11 0.03000000 sec  
 d12 0.00002000 sec

==== CHANNEL f1 =====  
 NUC1 13C  
 P1 6.00 usec  
 PL1 2.00 dB  
 SFO1 75.4752653 MHz

==== CHANNEL f2 =====  
 CPDPRG2 waltz16  
 NUC2 1H  
 PCPBD2 80.00 usec  
 PL2 0.00 dB  
 PL12 19.47 dB  
 PL13 19.00 dB  
 SFO2 300.1312005 MHz

F2 - Processing parameters  
 SI 32768  
 SF 75.4677190 MHz  
 WDW EM  
 SSB 0  
 LB 1.00 Hz  
 GB 0  
 PC 1.40

S43

=====  
Injection Date : 9/14/2010 3:03:03 PM  
Sample Name : VB-GSA-0270 Location : Vial 4  
Acq. Operator : Karen Inj : 1  
Acq. Instrument : Instrument 1 Inj Volume : 0.1 µl  
Acq. Method : C:\HPCHEM\1\METHODS\LC\_MS.M  
Last changed : 9/14/2010 3:01:13 PM by Karen  
Analysis Method : C:\HPCHEM\1\METHODS\LC\_MS.M  
Last changed : 9/16/2010 5:50:56 PM by Karen  
Zorbax SB C18, 150 x 4.6, 3.5µ, 55:45:0.25, MeCN/H2O/formic, POS, 150-400; frag 70; 25C, cap  
volt 2000, gas temp 325; drying gas 10  
=====

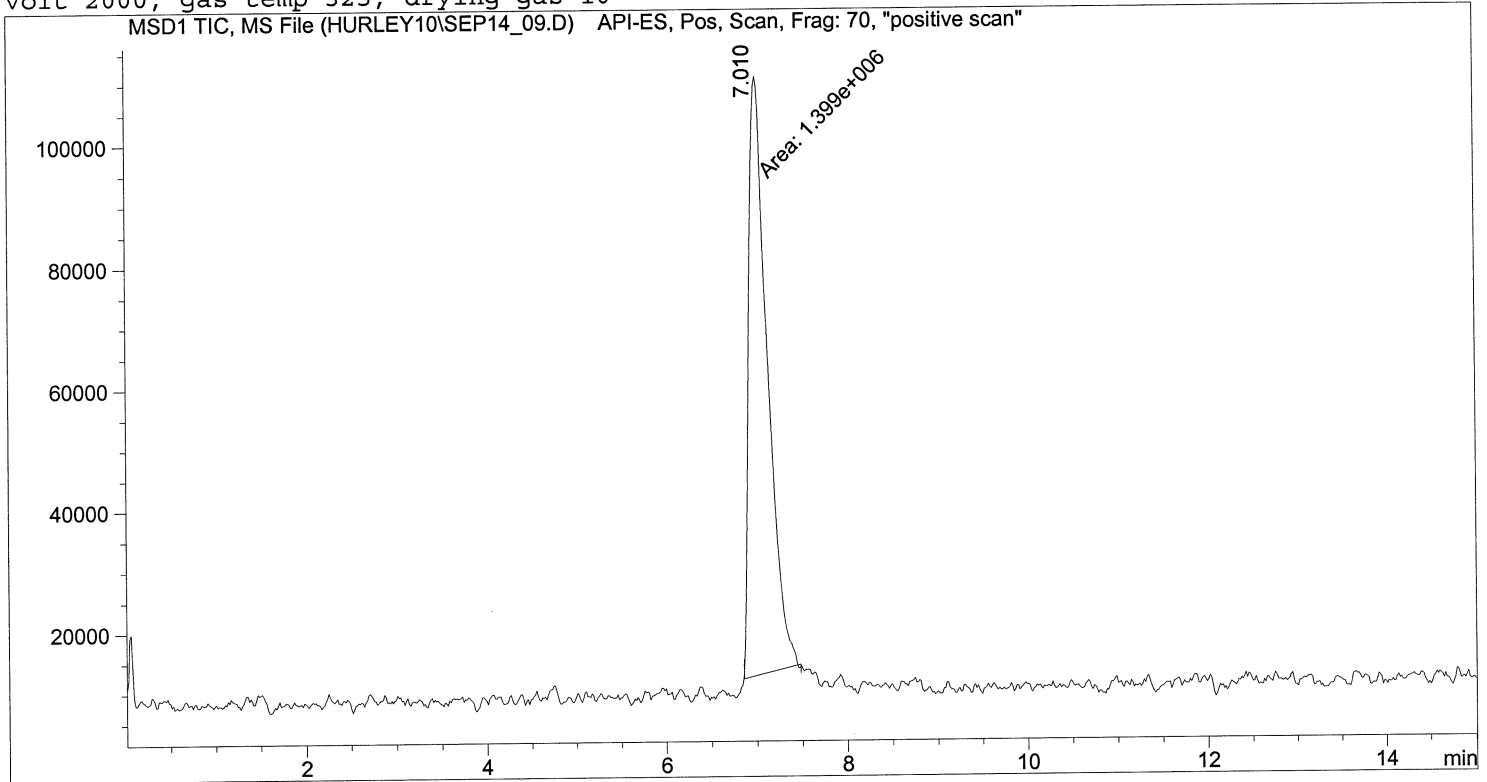

=====  
Area Percent Report  
=====

Compound 6

Sorted By : Signal  
Multiplier : 1.0000  
Dilution : 1.0000  
Use Multiplier & Dilution Factor with ISTDs

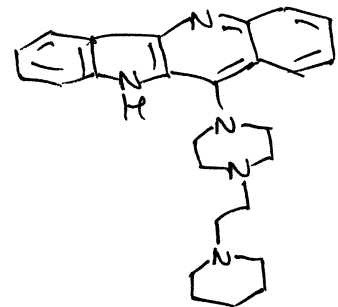

VB-GSA-0270

Signal 1: MSD1 TIC, MS File

| Peak # | RetTime [min] | Type | Width [min] | Area      | Height    | Area %   |
|--------|---------------|------|-------------|-----------|-----------|----------|
| 1      | 7.010         | MM   | 0.2364      | 1.39900e6 | 9.86347e4 | 100.0000 |

Totals : 1.39900e6 9.86347e4

=====  
\*\*\* End of Report \*\*\*  
=====

=====  
Injection Date : 9/14/2010 3:03:03 PM Location : Vial 4  
Sample Name : VB-GSA-0270 Inj : 1  
Acq. Operator : Karen Inj Volume : 0.1 µl  
Acq. Instrument : Instrument 1  
Acq. Method : C:\HPCHEM\1\METHODS\LC\_MS.M  
Last changed : 9/14/2010 3:01:13 PM by Karen  
Analysis Method : C:\HPCHEM\1\METHODS\LC\_MS.M  
Last changed : 9/16/2010 5:50:56 PM by Karen  
Zorbax SB C18, 150 x 4.6, 3.5µ, 55:45:0.25, MeCN/H2O/formic, POS, 150-400; frag 70; 25C,  
cap volt 2000, gas temp 325; drying gas 10

Current Chromatogram(s)

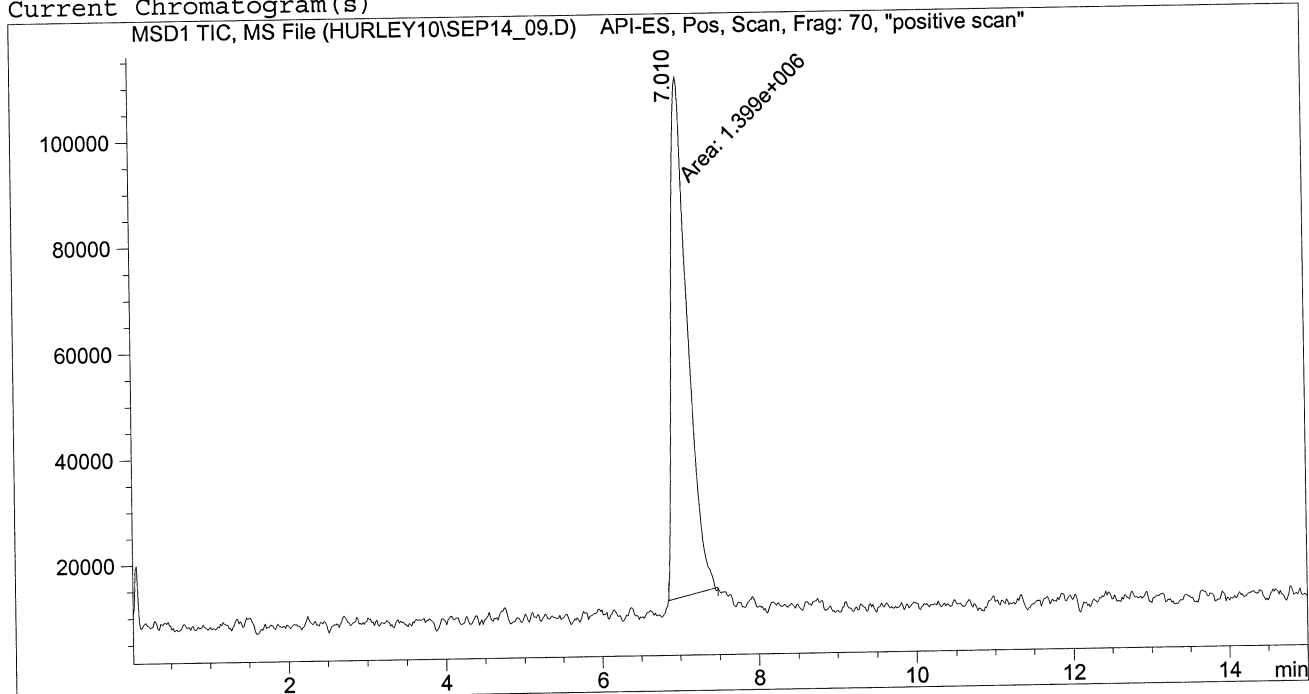

Apex Mass Spectrum of Peak 7.01 of SEP14\_09.D

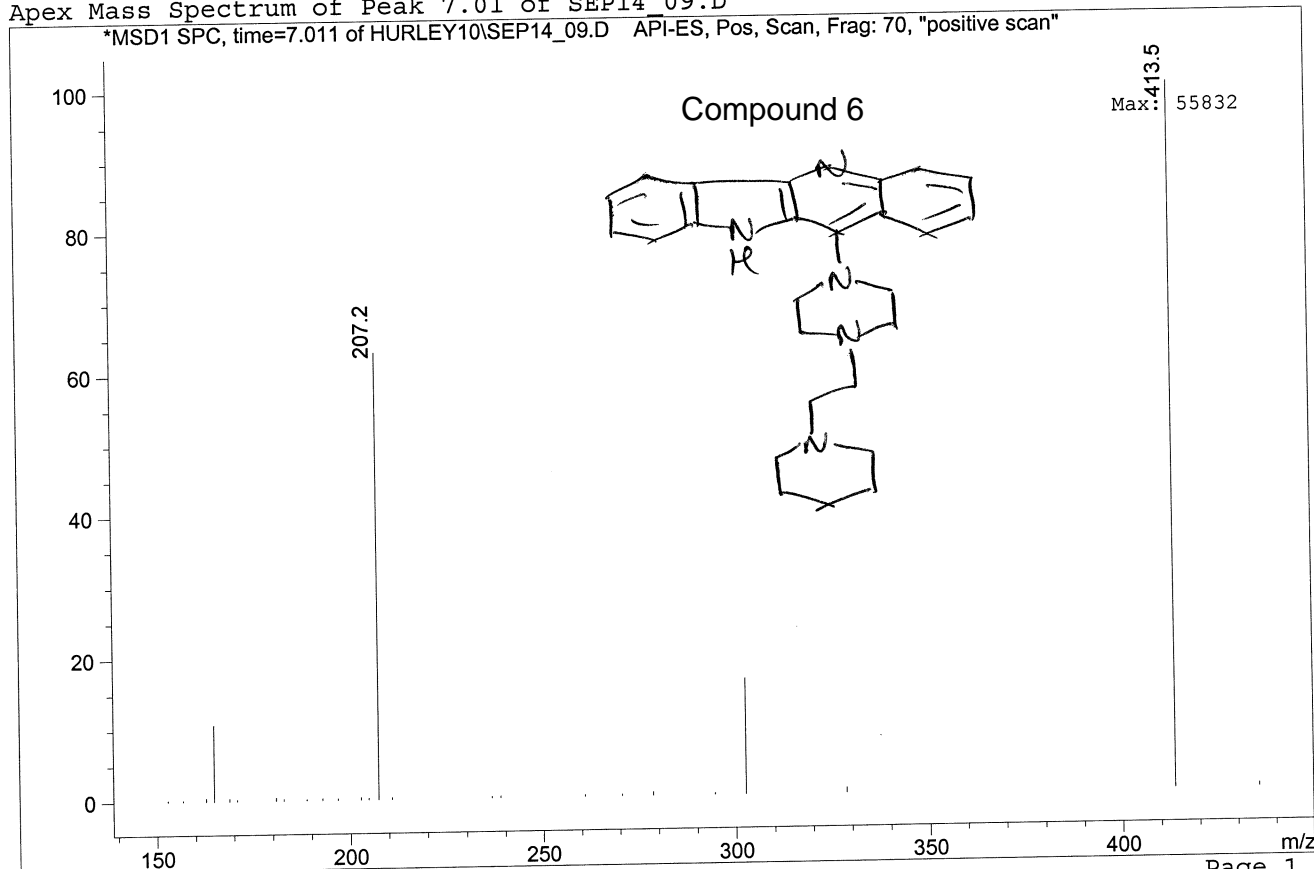

VB\_0270 #2-12 RT: 0.04-0.24 AV: 11 NL: 6.04E6  
T: + p Full ms [180.00-1200.00]

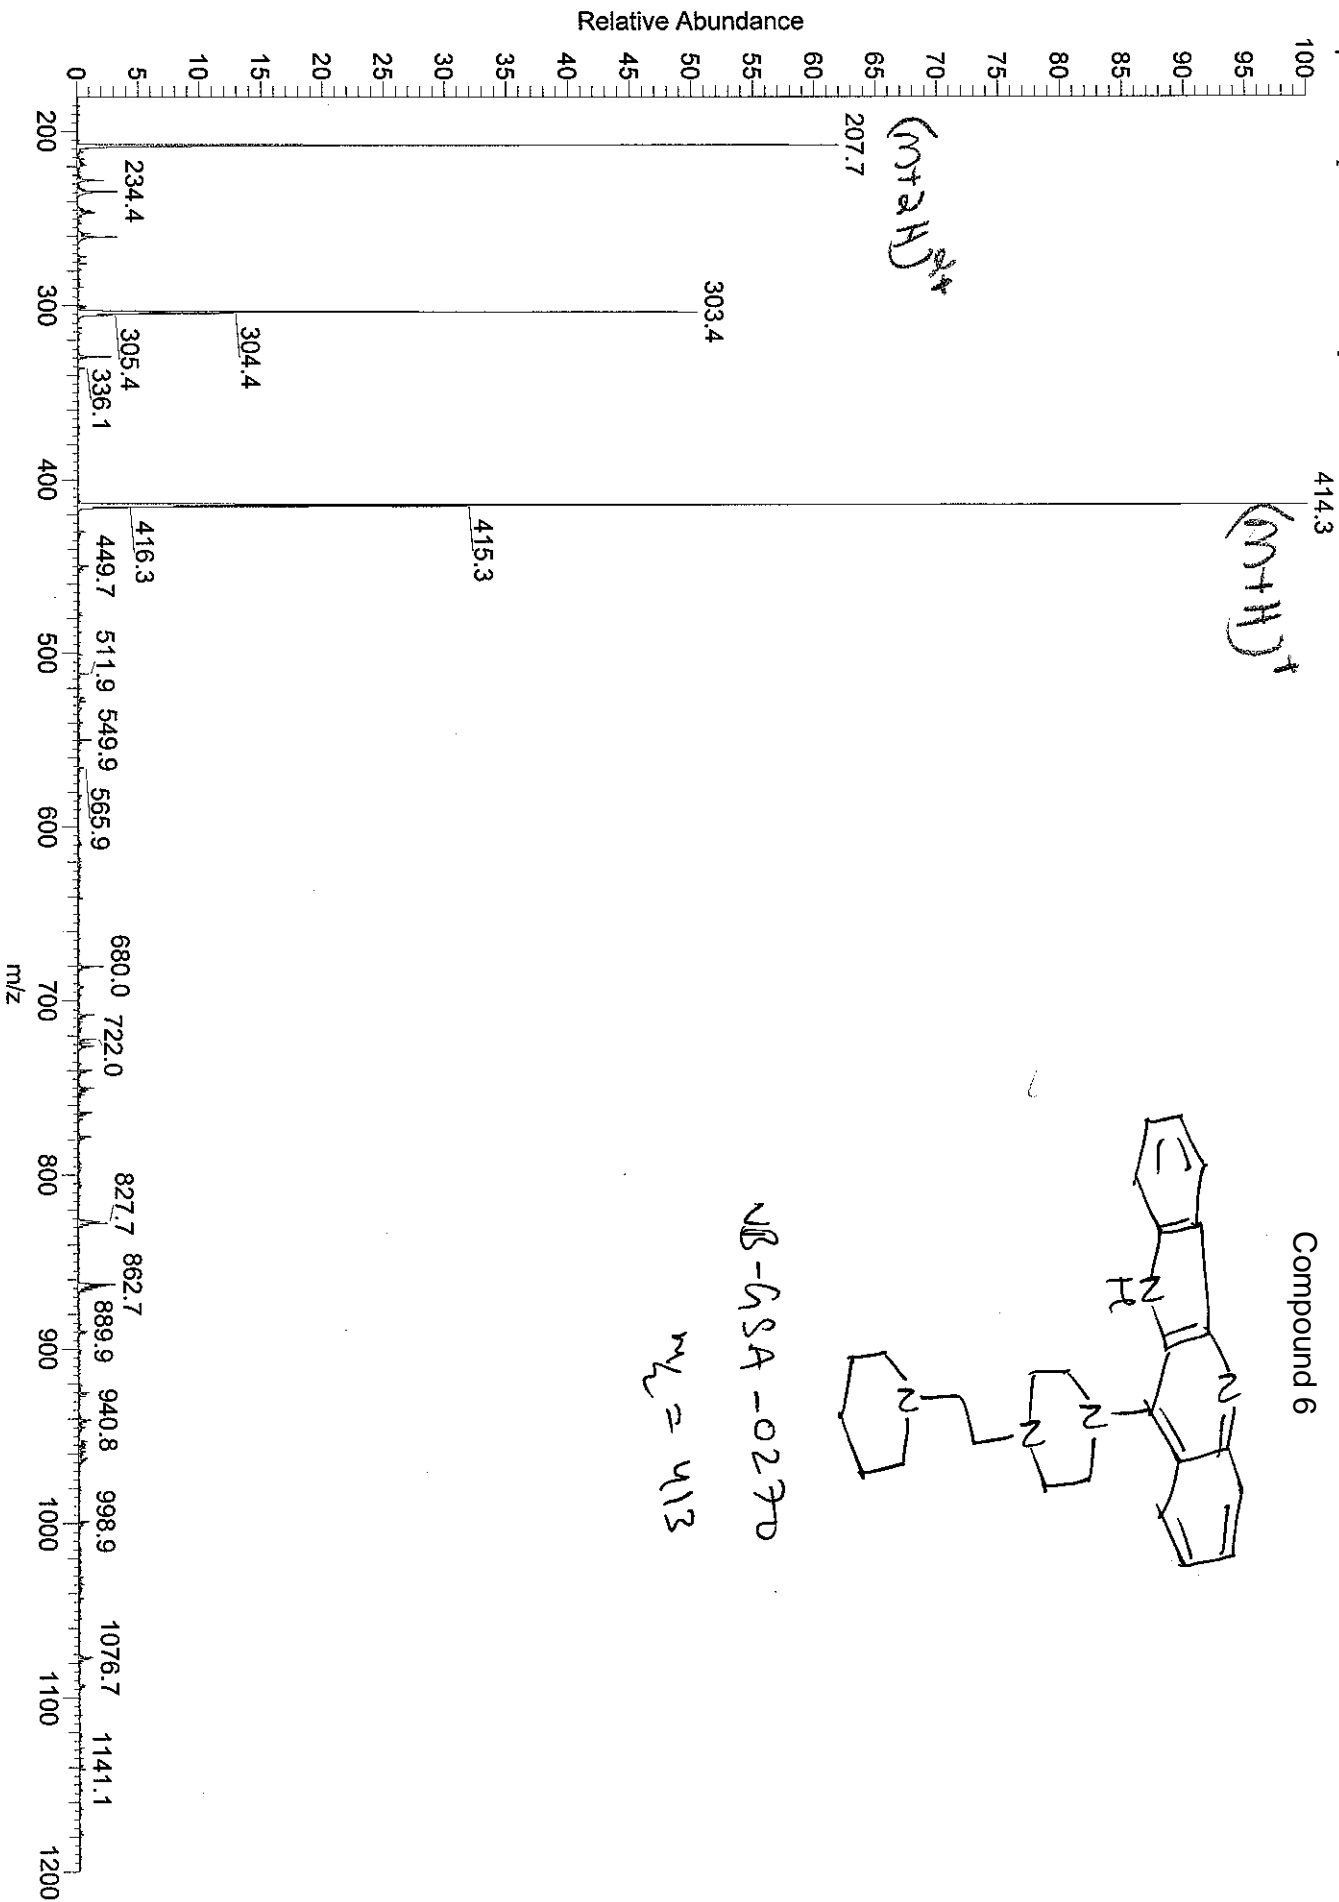

(M+2H)<sup>2+</sup>

(M+H)<sup>+</sup>

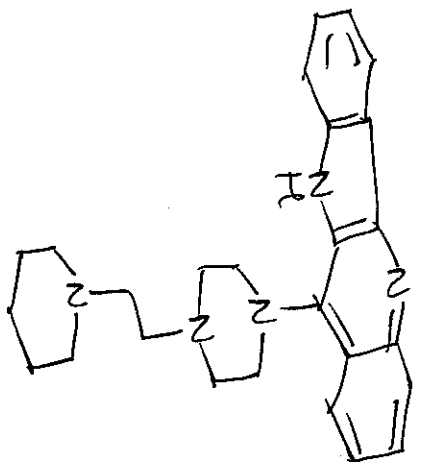

Compound 6

NB-GSA-0270

$m/z = 413$

VB\_0270 #2-12 RT: 0.04-0.24 AV: 11 NL: 3.75E6  
T: + p Full ms [180.00-1200.00]

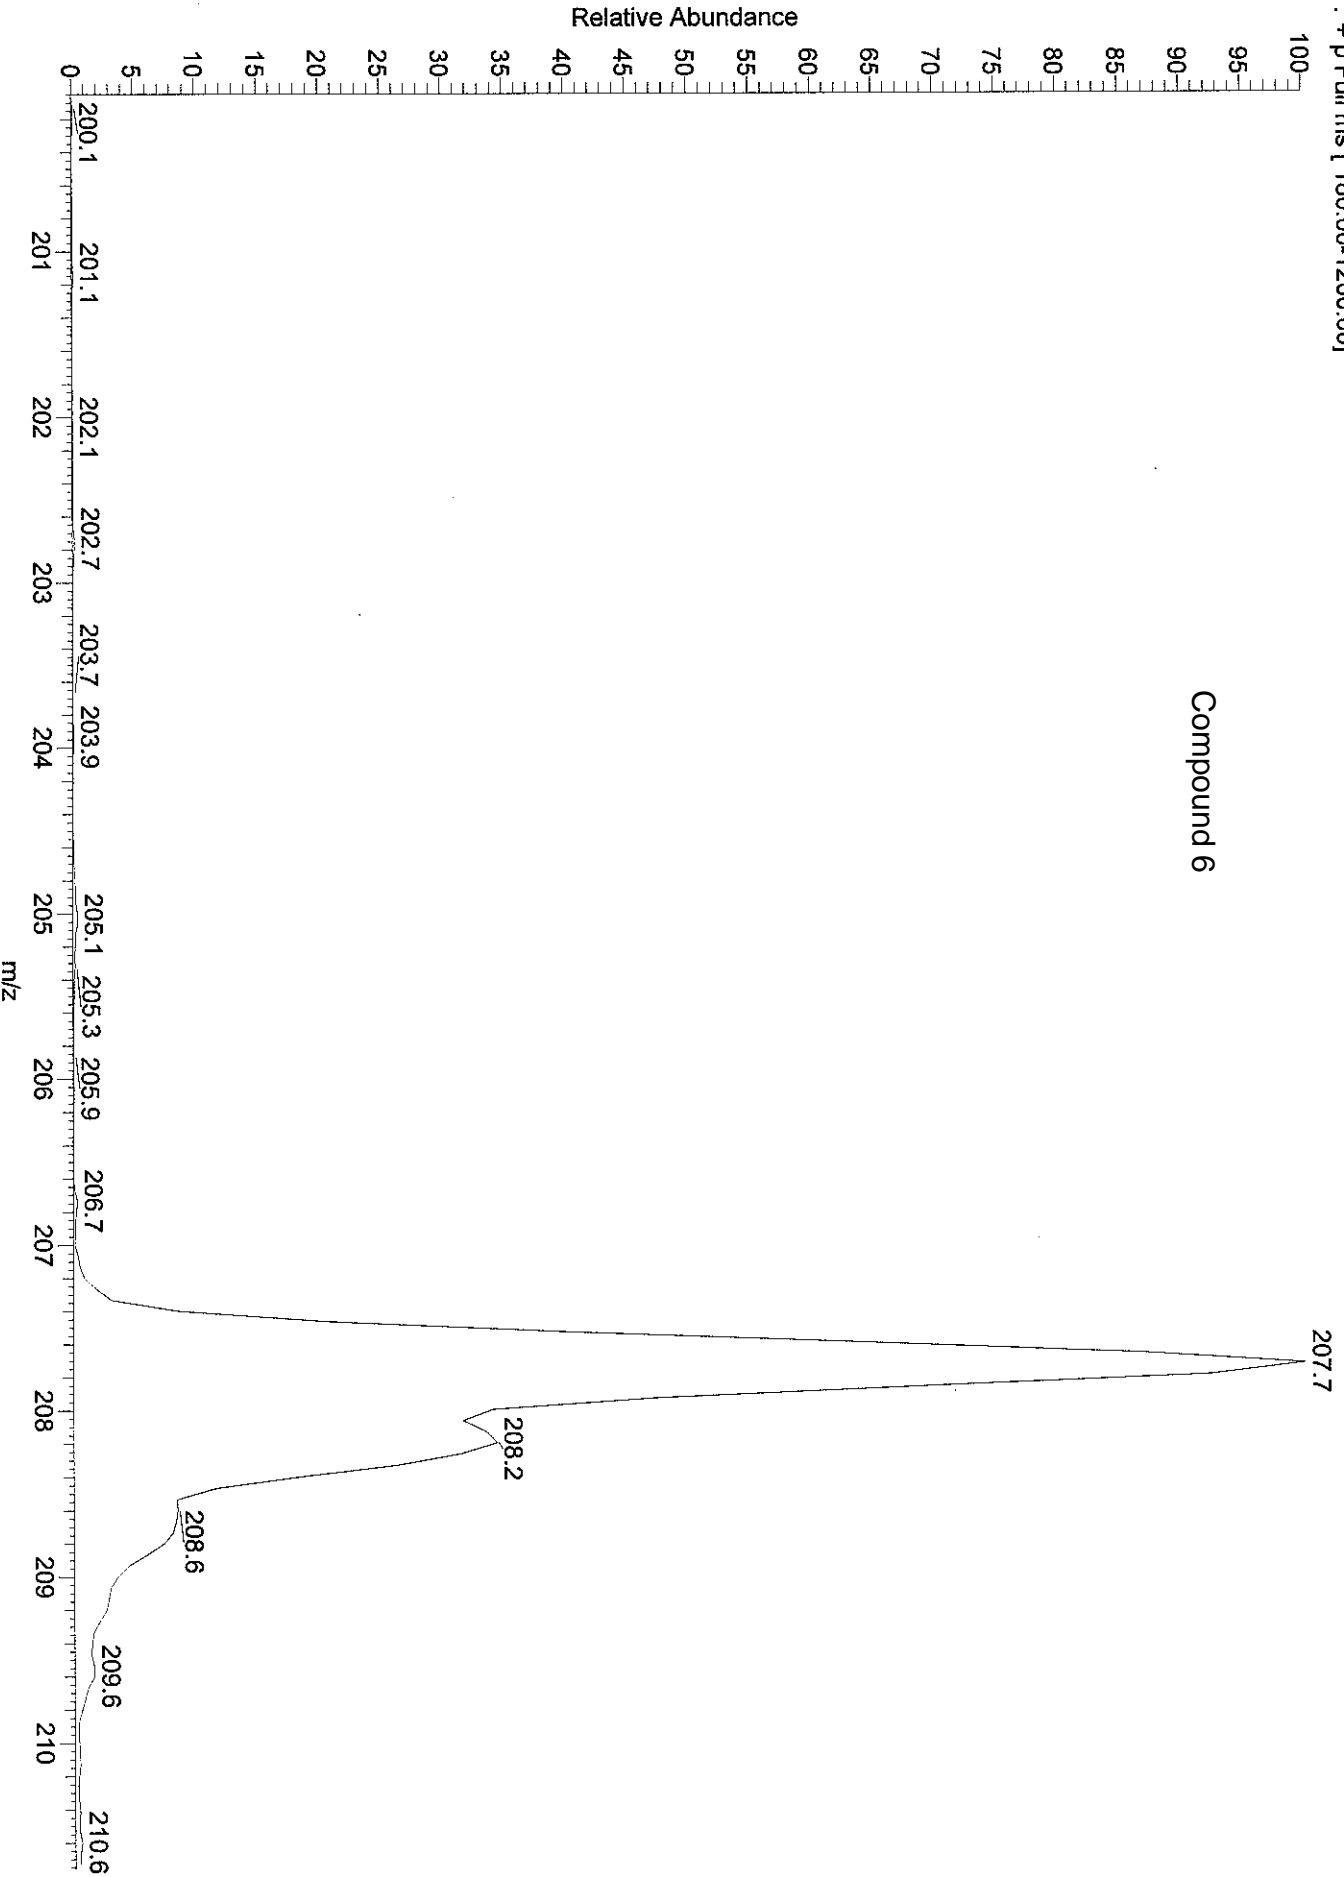

Compound 6

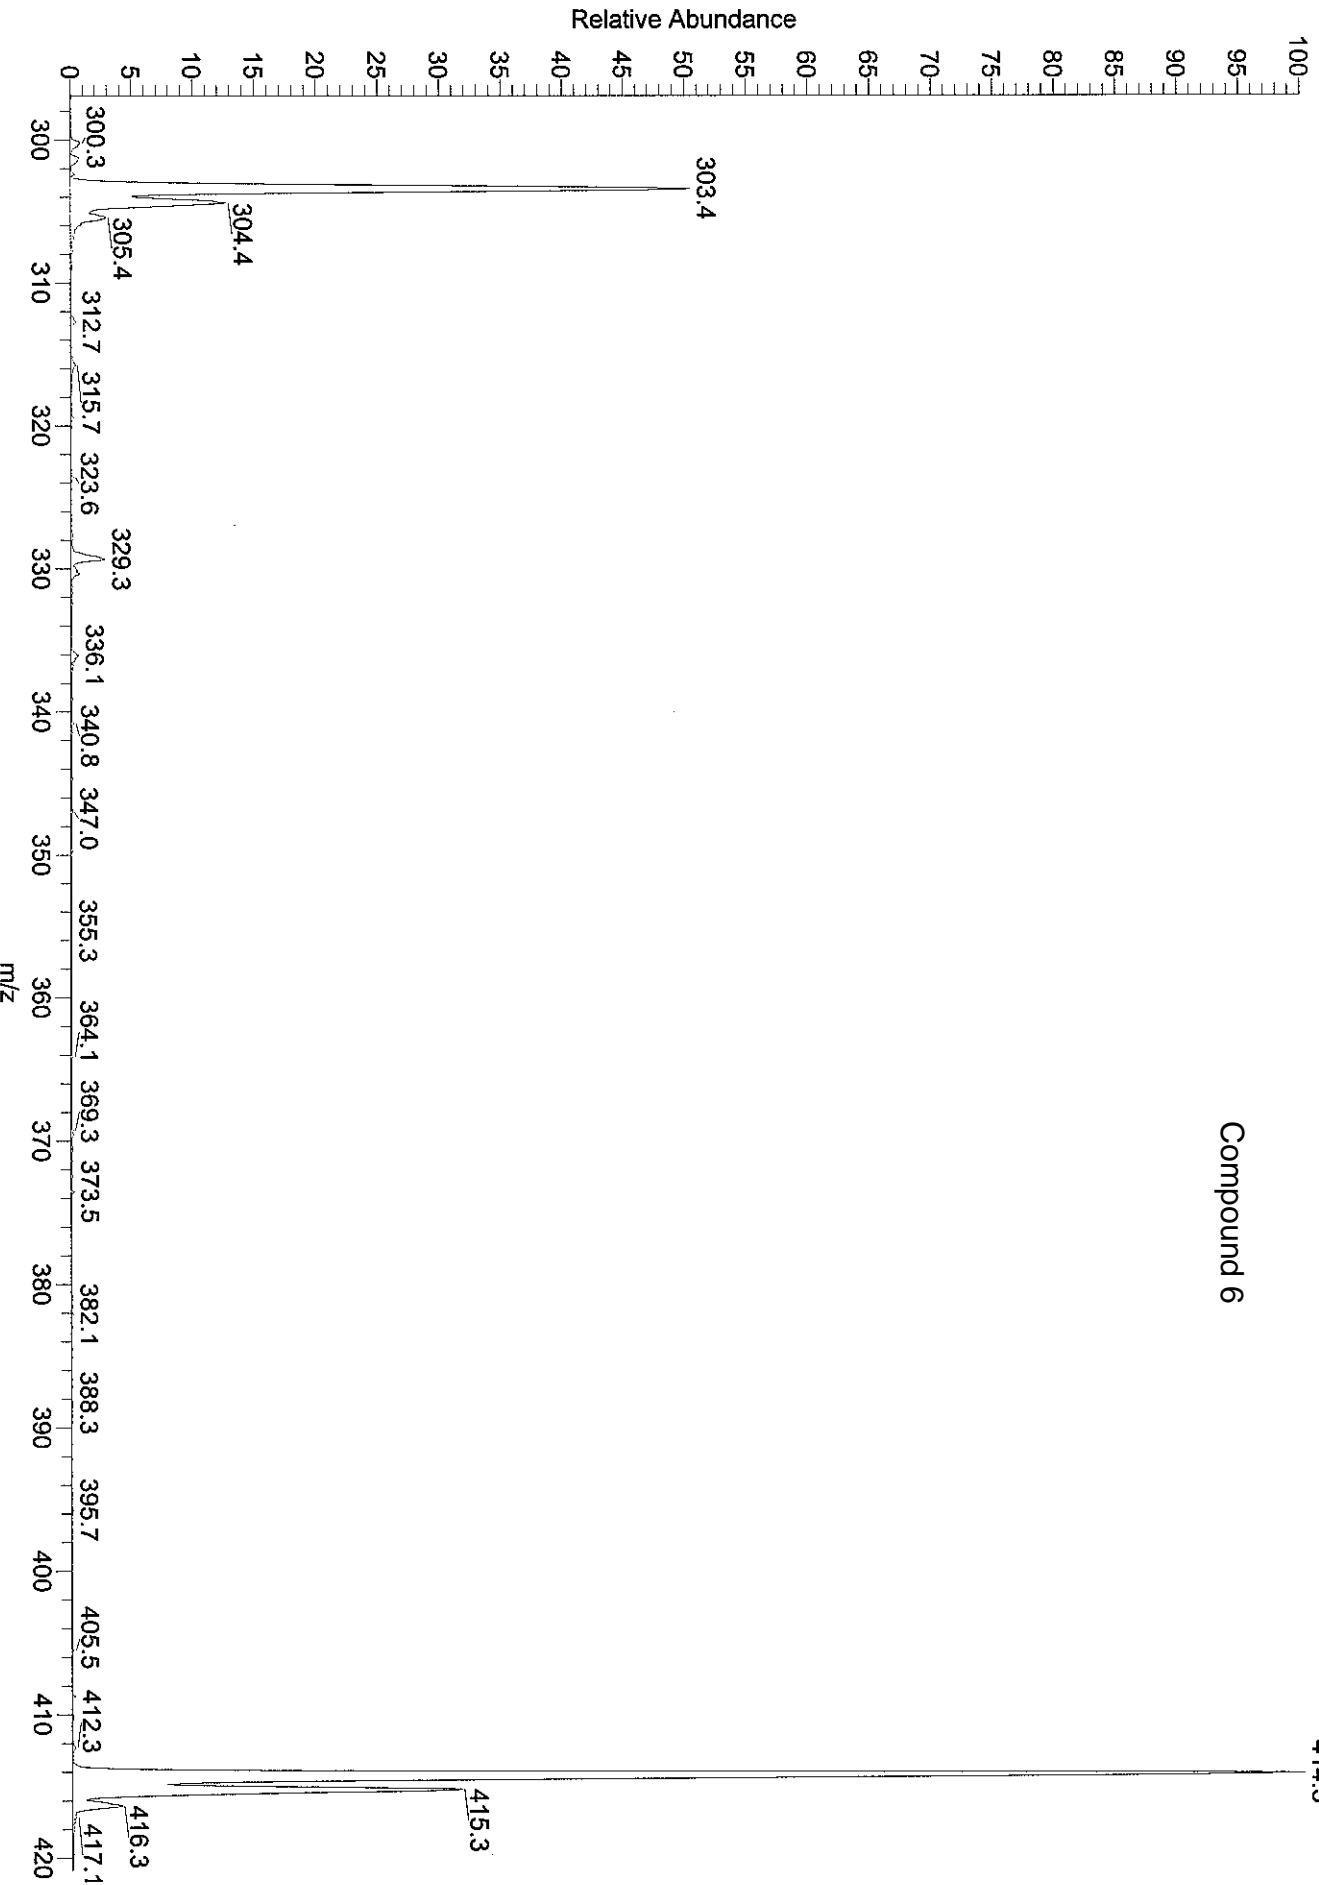

VB\_0270 #29-49 RT: 0.66-1.16 AV: 21 NL: 1.64E6  
T: + p Full ms2 414.30@28.00 [110.00-1200.00]

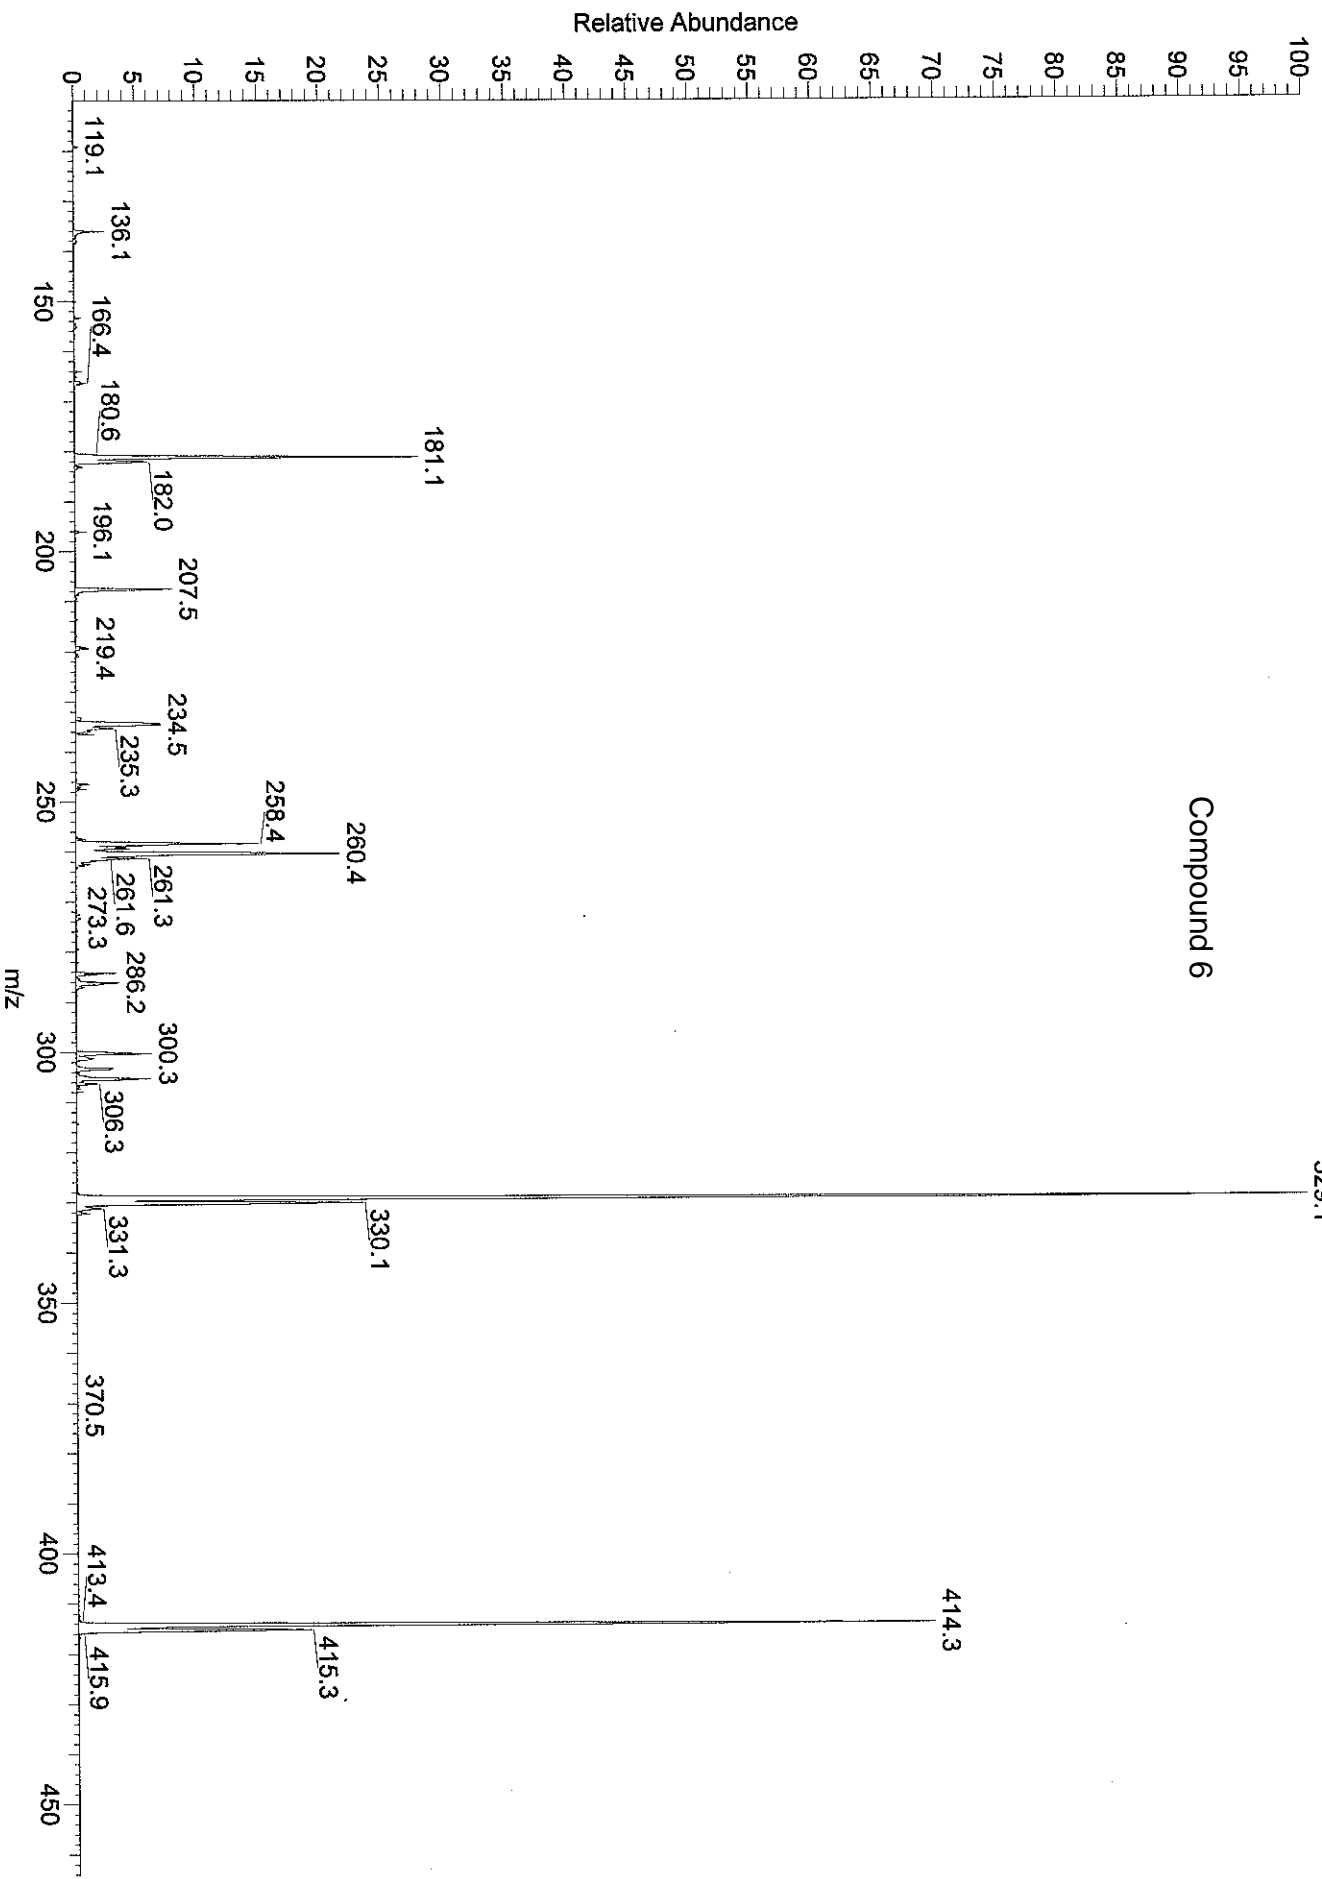



VB\_0270 #75-89 RT: 1.77-2.12 AV: 15 NL: 5.69E6  
T: + p Full ms2 207.70@20.00 [55.00-1200.00]

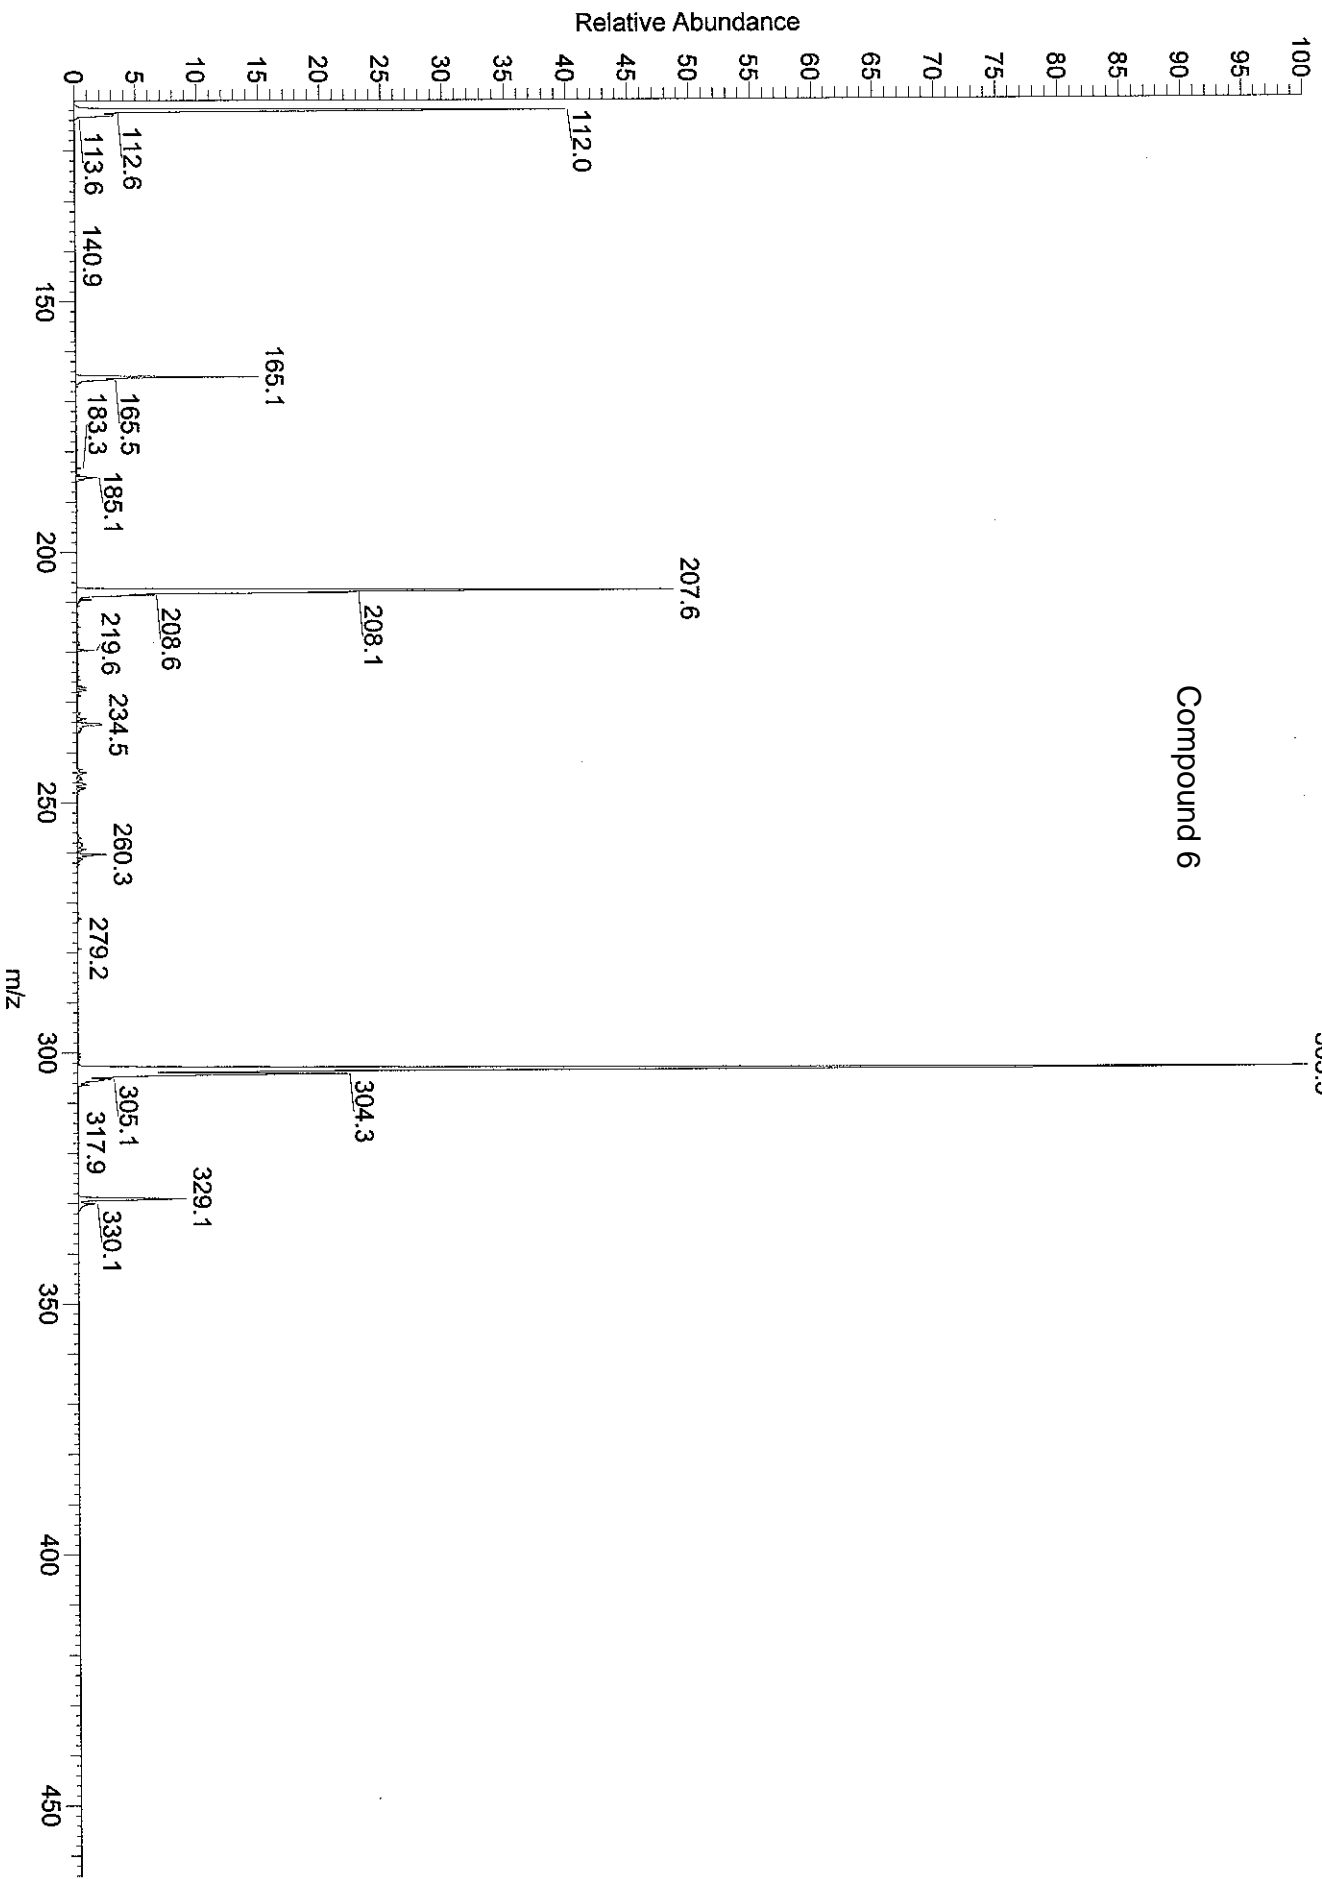

VB\_0270 #116-131 RT: 2.89-3.37 AV: 16 NL: 1.48E5  
T: + p Full ms2 303.40@34.00 [ 80.00-1200.00]

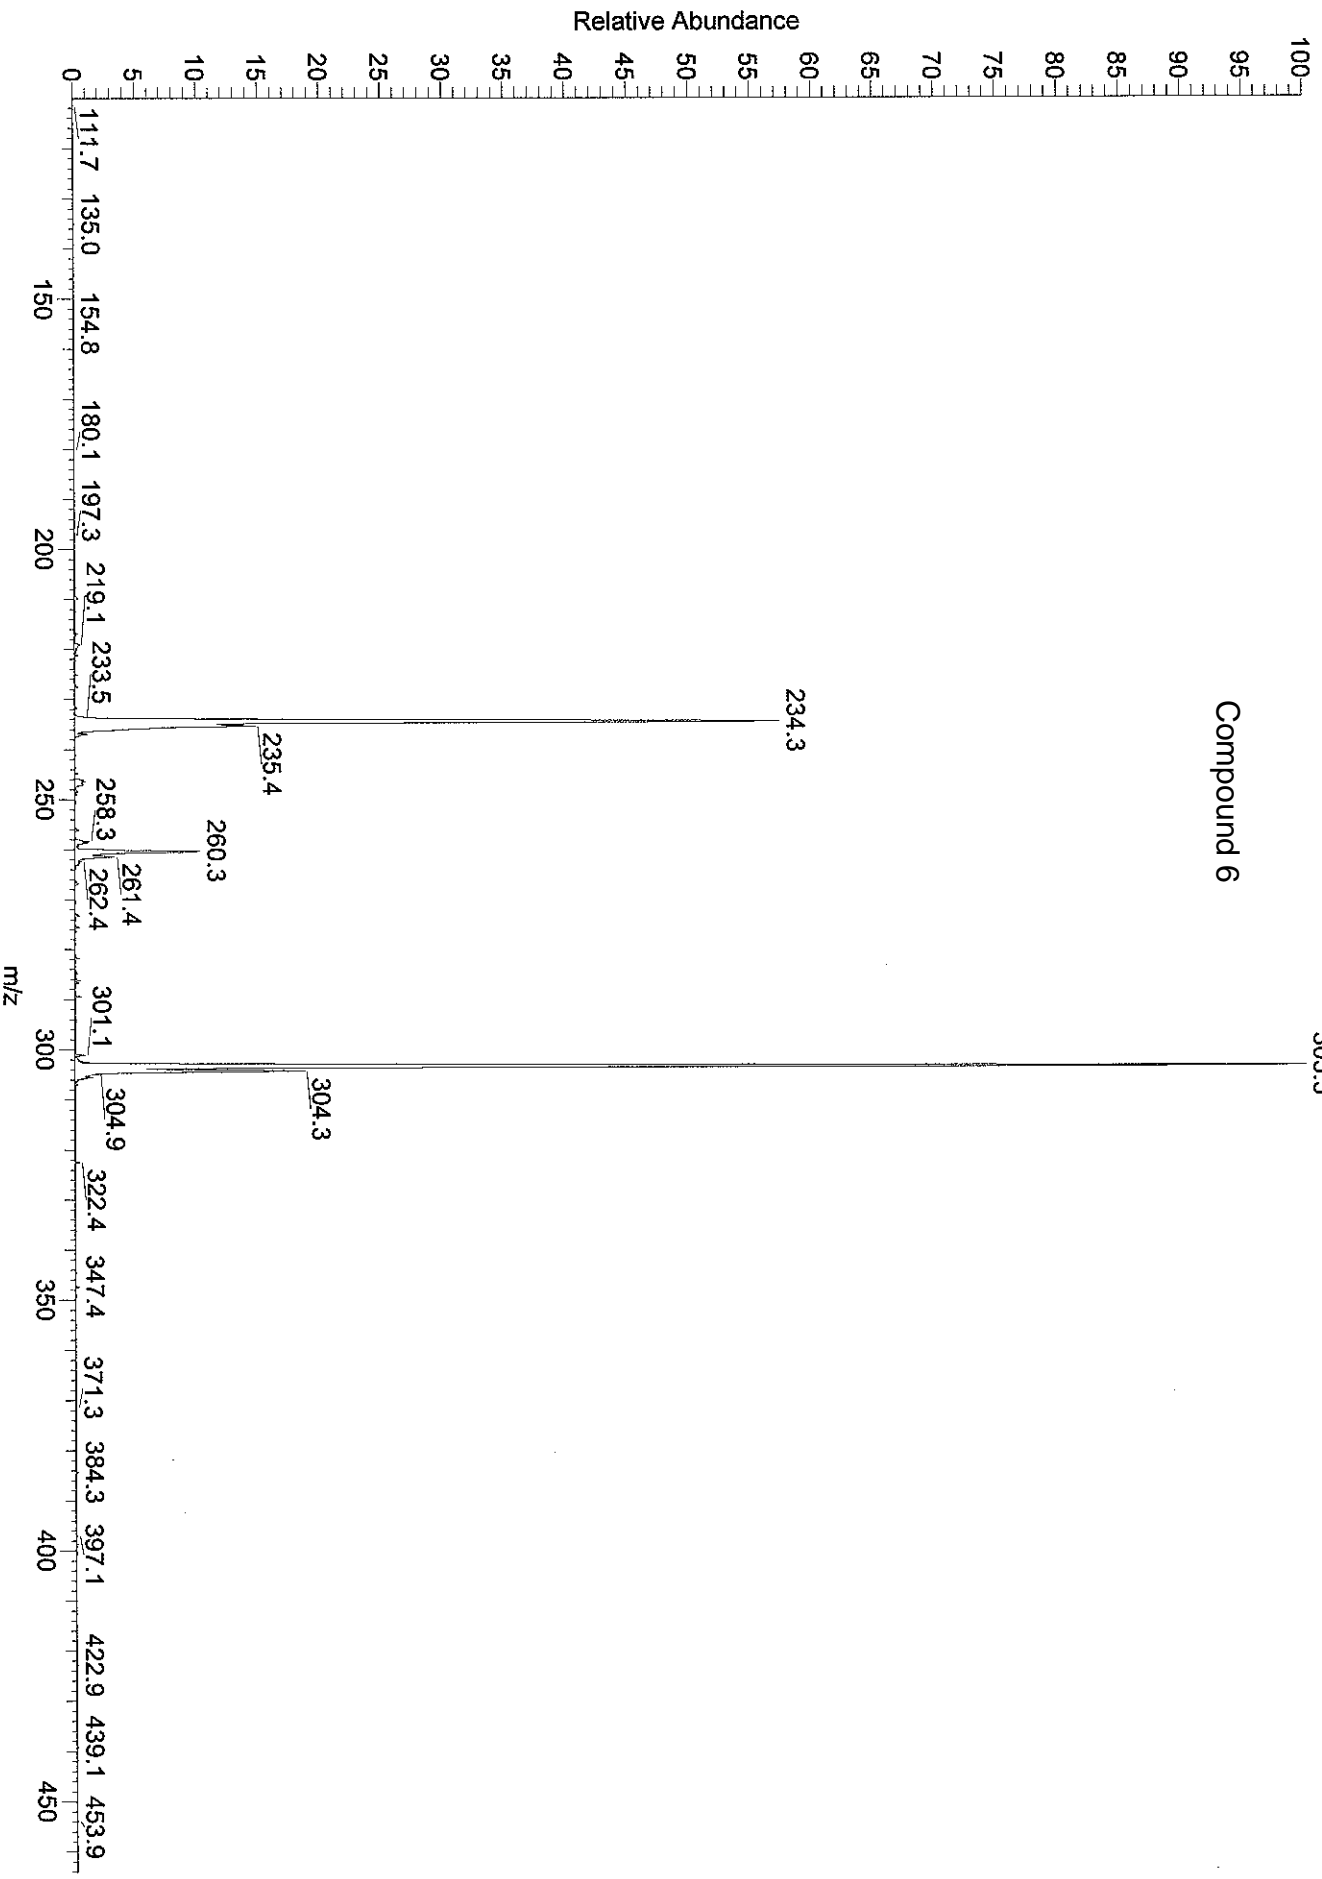

# Generic Display Report

## Analysis Info

Analysis Name D:\DATA\Facility\_Sept\_10\VB-0270\_000002.d  
Method ESL\_101506  
Sample Name VB-0270  
Comment V. Chappeta, positive mode, ACN:H2O 1:1.0.1%FA

Acquisition Date 9/16/2010 2:04:45 PM

Operator  
Instrument apex-Ultra

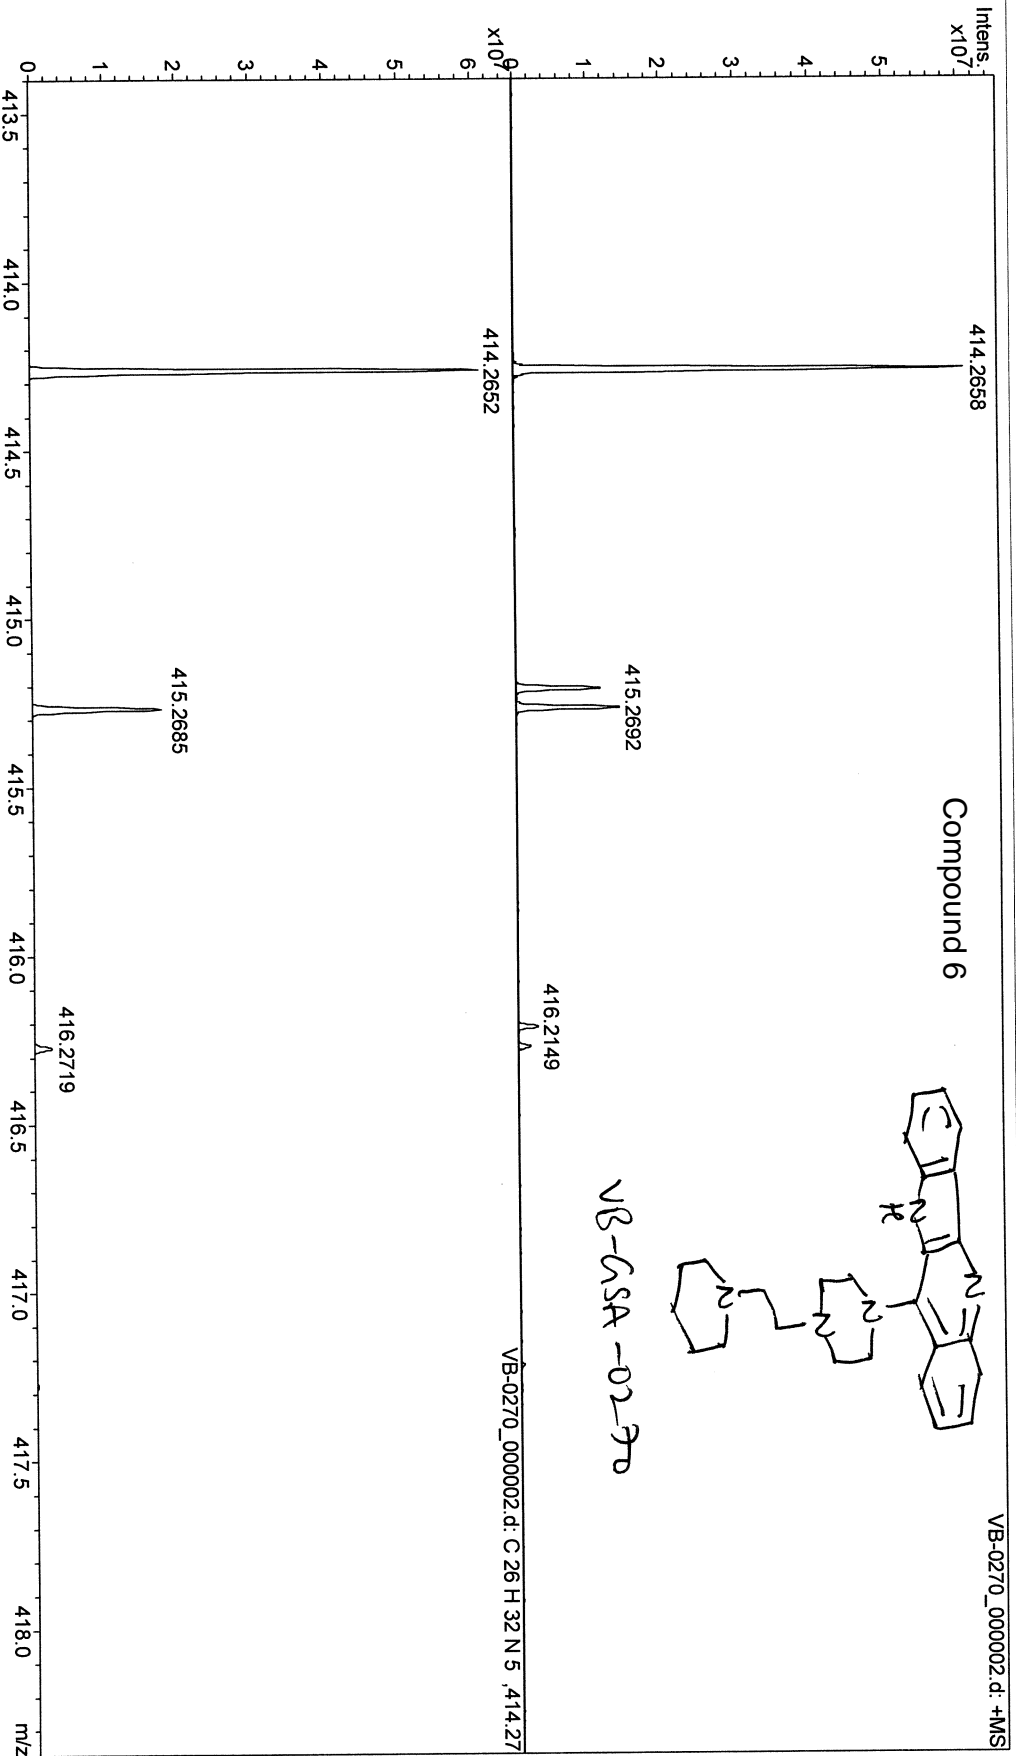

SmartFormula Manually

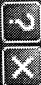

Min  
Max

C<sub>15</sub>

Generate

C<sub>15</sub>-n

Help

Note: for m < 2000 the elements C, H, N, and O are considered implicitly.

Measured m/z 414.2658

Tolerance 2

mDa

Charge 1

| Meas. m/z | # | Formula                                         | Score  | m/z      | err [mDa] | err [ppm] | mSigma | rdB  | e_Conf | N-Rule |
|-----------|---|-------------------------------------------------|--------|----------|-----------|-----------|--------|------|--------|--------|
| 414.2658  | 2 | C <sub>26</sub> H <sub>32</sub> N <sub>5</sub>  | 100.00 | 414.2652 | -0.6      | -1.4      | 41.5   | 13.5 | even   | ok     |
| 1         | 1 | C <sub>25</sub> H <sub>36</sub> NO <sub>4</sub> | 62.36  | 414.2639 | -1.9      | -4.6      | 27.7   | 8.5  | even   | ok     |

Compound 6

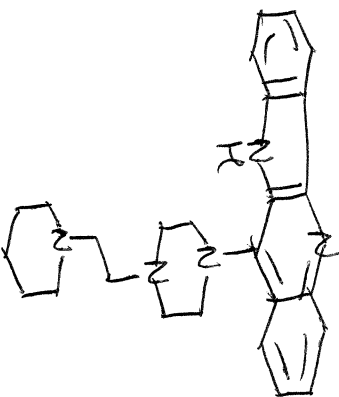

Automatically locate monoisotopic peak

Maximum number of formulas 500

Check rings plus double bonds

Minimum -0.5 Maximum 40

Electron configuration

Filter H/C element ratio

Minimum H/C 0 Maximum H/C 3

Estimate carbon number

Generate immediately

Show Pattern

Current Data Parameters  
 NAME VB-GSA-182  
 EXNO 99  
 PROONO 1

F2 - Acquisition Parameters  
 Date 20091123  
 Time 15:37  
 INSTRUM spect  
 PROBHD 5 mm Dual 13  
 PULPROG zg30  
 TD 16384  
 SOLVENT DMSO  
 NS 16  
 DS 2  
 SWH 6258.772 Hz  
 FIDRES 0.382005 Hz  
 AQ 1.3089329 sec  
 RG 181  
 DW 79.888 usec  
 DE 6.00 usec  
 TE 300.0 K  
 D1 2.00000000 sec

===== CHANNEL f1 =====  
 NUC1 1H  
 P1 13.40 usec  
 PL1 0.00 dB  
 SFO1 499.4828750 MHz

F2 - Processing parameters  
 SI 32768  
 SF 499.480000 MHz  
 WDW EM  
 SSB 0  
 LB 0.20 Hz  
 GB 0  
 PC 1.00

DRX-500

- 8.342
- 8.325
- 8.305
- 8.290
- 8.151
- 8.134
- 7.642
- 7.640
- 7.632
- 7.629
- 7.623
- 7.615
- 7.612
- 7.609
- 7.607
- 7.593
- 7.579
- 7.577
- 7.561
- 7.559
- 7.545
- 7.543
- 7.531
- 7.529
- 7.273
- 7.271
- 7.257
- 7.256
- 7.244
- 7.242

Compound 7

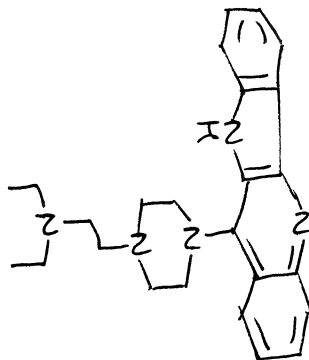

VB-GSA-182  
 (DMSO-d<sub>6</sub>; 500 MHz)

- 3.491
- 2.782
- 2.632
- 2.622
- 2.578
- 2.563
- 2.520
- 2.517
- 2.513
- 2.510

- 1.024
- 1.010
- 0.996
- 0.011
- 0.009

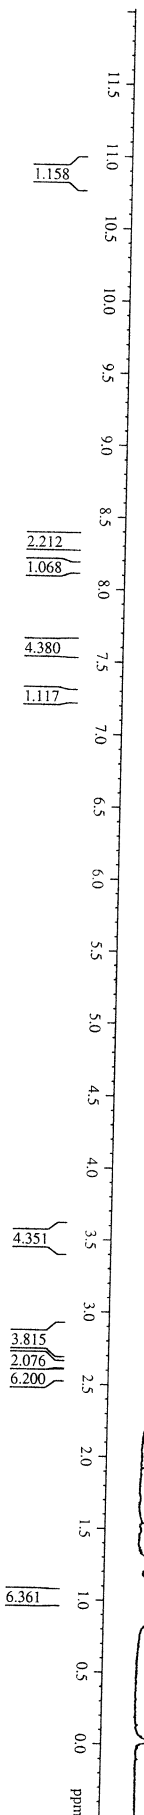

- 148.186
- 145.834
- 144.822
- 136.751
- 130.273
- 129.901
- 127.256
- 126.986
- 125.071
- 124.307
- 124.138
- 122.121
- 121.927
- 120.184
- 112.901

Compound 7

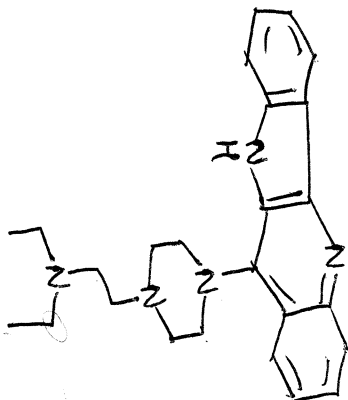

VB-GSA-182

- 57.128
- 54.862
- 51.578
- 50.936
- 47.642
- 41.218
- 40.941
- 40.662
- 40.384
- 40.106
- 39.828
- 39.549
- 39.357
- 12.684
- 0.957

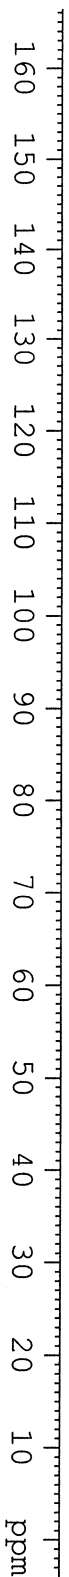

```

Current Data Parameters
NAME          VB-GSA-182-Final
EXPNO         1
PROCNO        1

F2 - Acquisition Parameters
Date_         20091110
Time_         7.45
INSTRUM       spect
PROBHD        5 mm QNP 1H/1
PULPROG       zgpg30
TD             65536
SOLVENT       DMSO-d6
NS            14000
DS            4
SWH           17985.611 Hz
FIDRES        0.274439 Hz
AQ            1.8219508 sec
RG            4096
DW            27.800 usec
DE            6.00 usec
TE            300.0 K
D1            2.00000000 sec
d11           0.03000000 sec
d12           0.00002000 sec

===== CHANNEL f1 =====
NUC1          13C
P1            6.00 usec
PL1           2.00 dB
SFO1         75.4752653 MHz

===== CHANNEL f2 =====
CPDPRG2      waltz16
NUC2          1H
PCPD2        80.00 usec
PL2           0.00 dB
PL12         19.47 dB
PL13         19.00 dB
SFO2         300.1312005 MHz

F2 - Processing parameters
SI            32768
SF            75.4677190 MHz
WDW           EM
SSB           0
LB            1.00 Hz
GB            0
PC            1.40
    
```

Reported by User: Jatinder J. (Jatinder)

Project Name: BIO5\_HPLC1

## SAMPLE INFORMATION

Sample Name: vb-182 prep  
 Sample Type: Unknown  
 Vial: 58  
 Injection #: 1  
 Injection Volume: 10.00 ul  
 Run Time: 45.0 Minutes  
 Sample Set Name Prime\_Run

Acquired By: Jatinder  
 Date Acquired: 9/29/2009 11:57:13 AM  
 Acq. Method Set: 10\_90B\_in  
 Date Processed: 9/29/2009 1:28:21 PM, 9/29/2009  
 Processing Method Peptide\_general  
 Channel Name: 2487Channel 1, 2487Channel 2  
 Proc. Chnl. Descr.: 220nm, 280nm

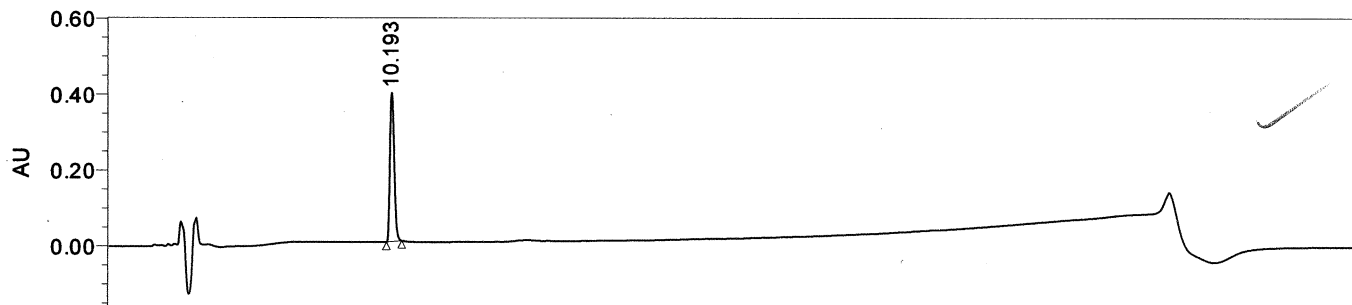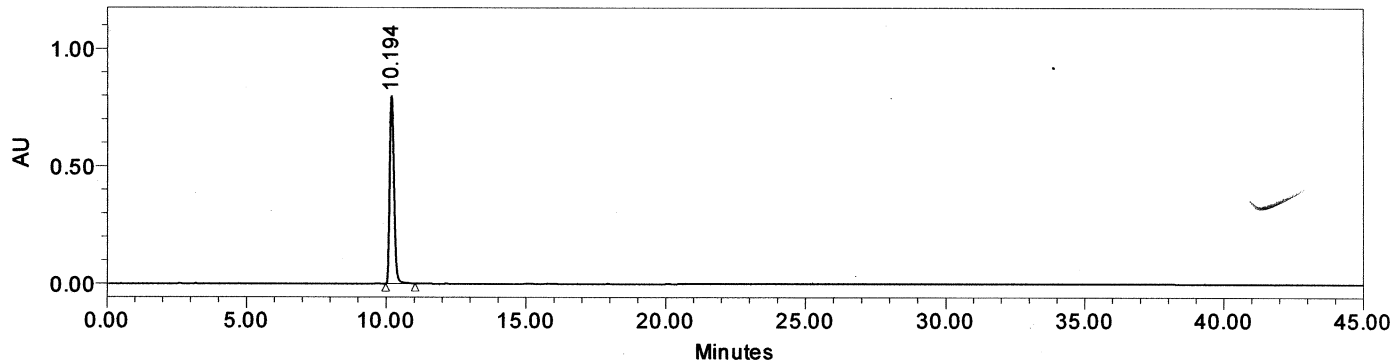

— Sample Name: vb-182 prep; Proc. Chan. Descr. 220nm  
 — Sample Name: vb-182 prep; Proc. Chan. Descr. 280nm

Channel 220 nm  
Channel: 2487Channel 1

| RT       | Area (μV*sec) | % Area | Channel       |
|----------|---------------|--------|---------------|
| 1 10.193 | 4.29e+006     | 100.00 | 2487Channel 1 |

Channel 280 nm  
Channel: 2487Channel 2

| RT       | Area (μV*sec) | % Area | Channel       |
|----------|---------------|--------|---------------|
| 1 10.194 | 8.95e+006     | 100.00 | 2487Channel 2 |

NOTES:

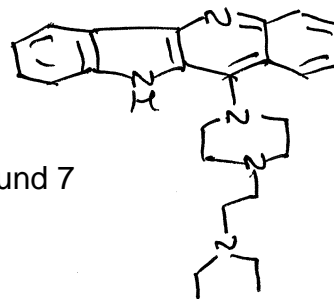

Compound 7

VB-GSA-182

11/11/2009 04:02:57 PM

VB-182

E:\MSLab\_LCQ\VB-182

Venkat Boddupally, MeOH:H2O 1:1

VB-182 #29-30 RT: 0.89-0.92 AV: 2 NL: 2.61E5

T: + p Full ms [100.00-1500.00]  
201.6

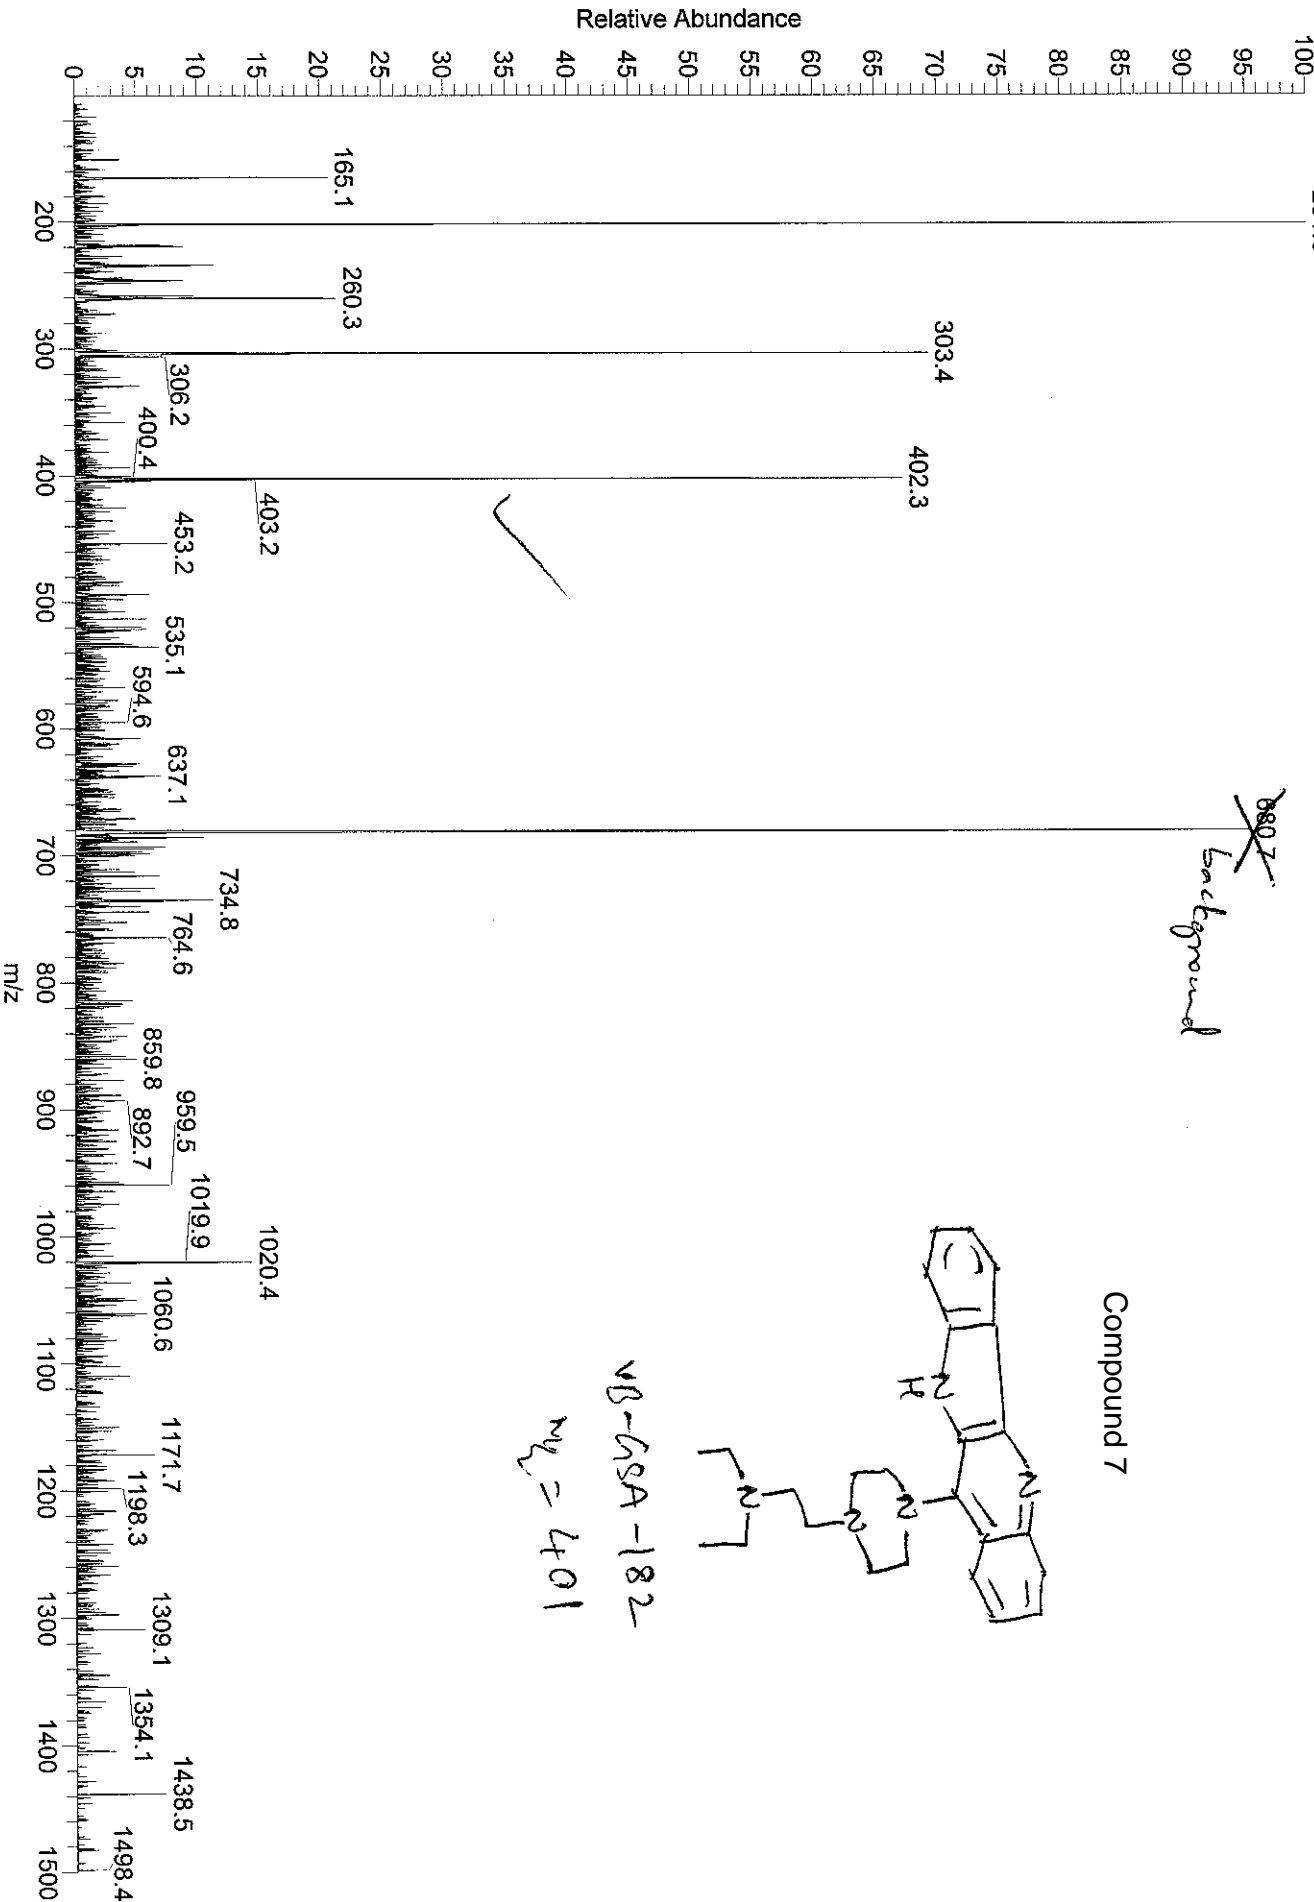



VB-182 #29-30 RT: 0.89-0.92 AV: 2 NL: 2.61E5  
T: + p Full ms [100.00-1500.00]

Compound 7

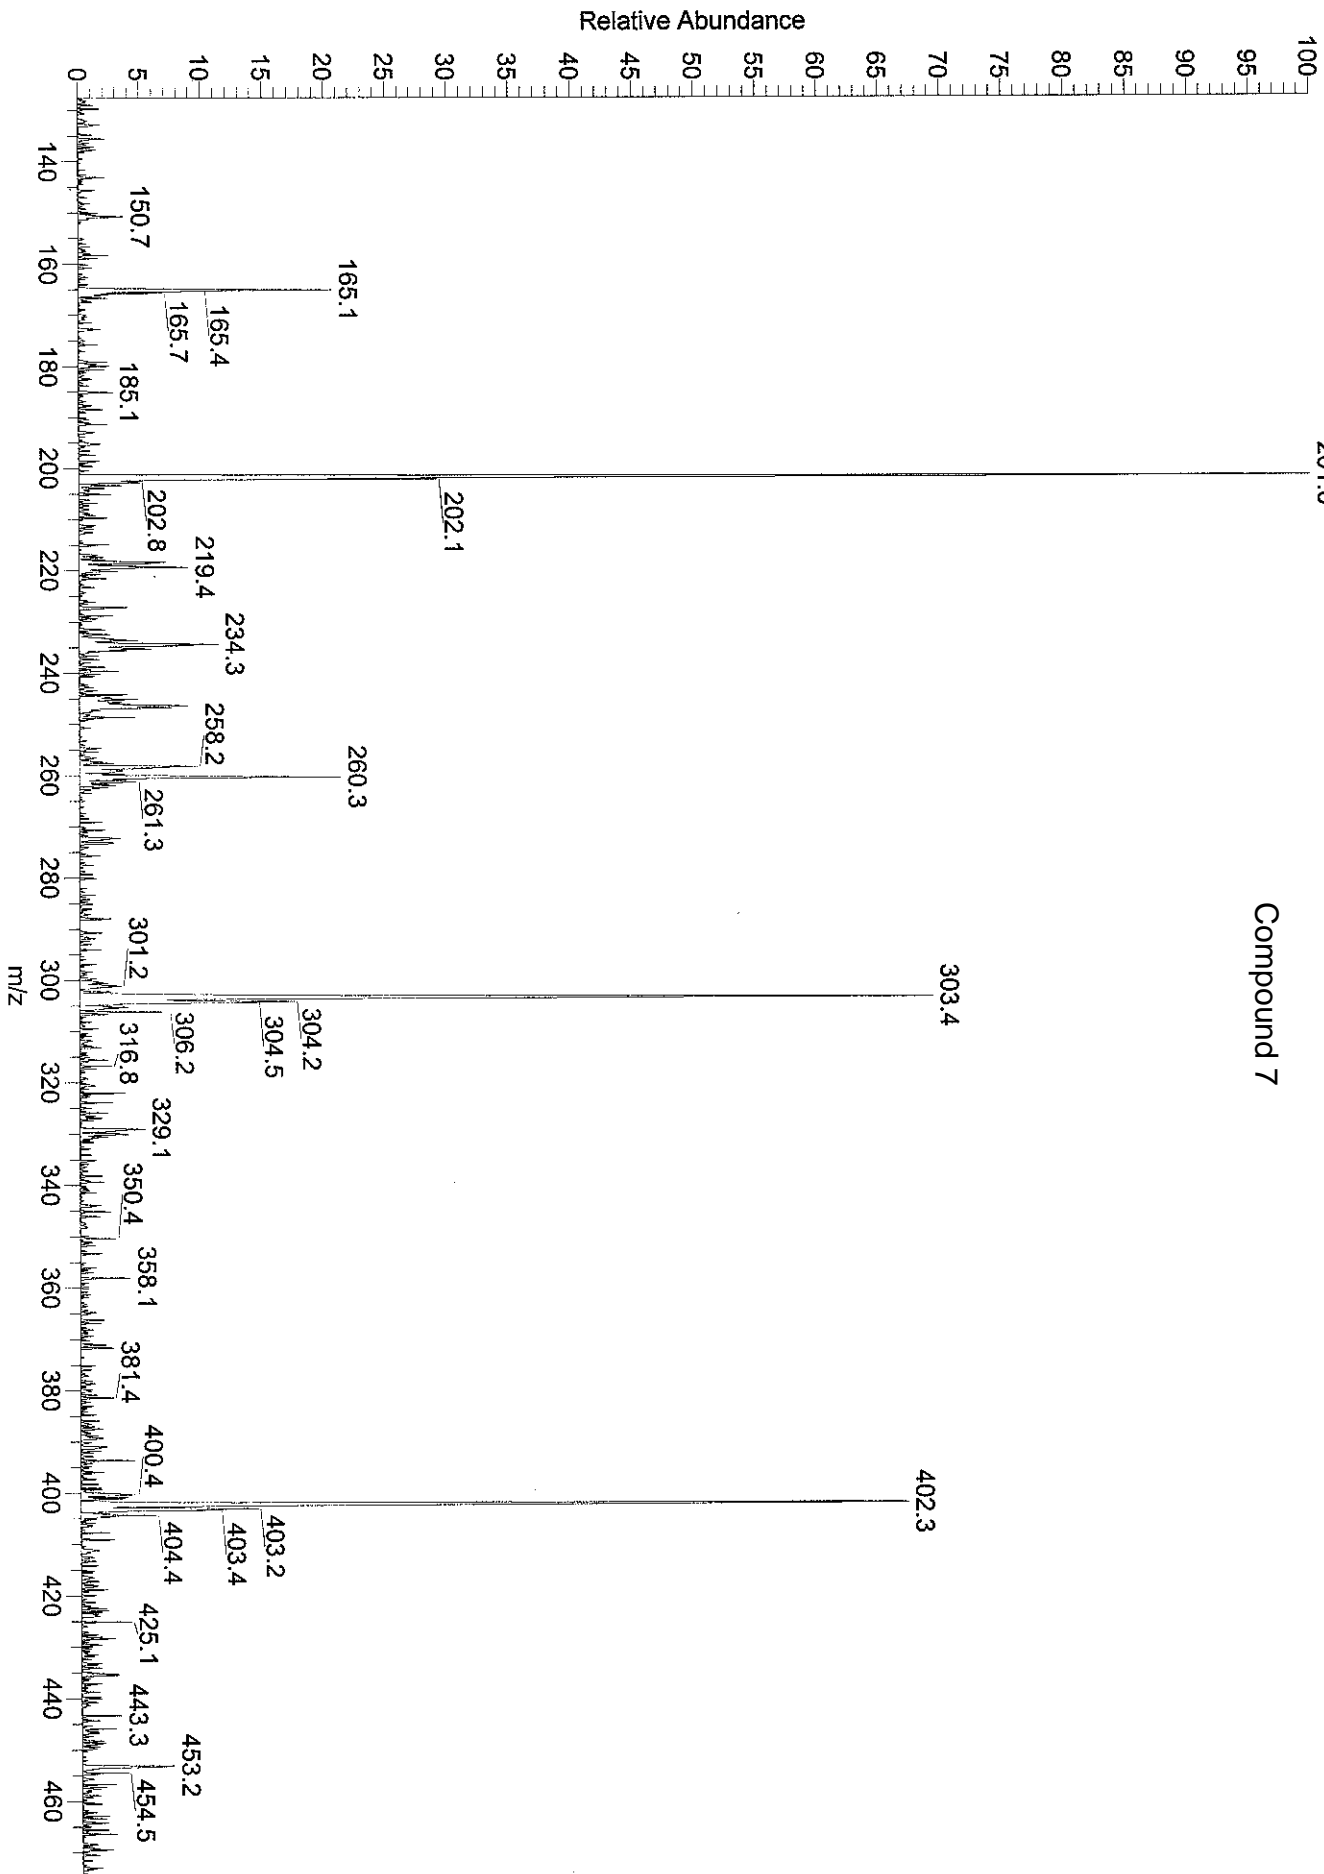

E:\MSLab\_LCQ\VB-182  
Venkat Boddupally, MeOH:H2O 1:1  
VB-182 #24-25 RT: 0.73-0.77 AV: 2 NL: 8.29E4  
89 T: + p Full ms2 303.00@30.00 [110.00-1500.00]

11/12/2009 04:02:57 PM

VB-182

Compound 7

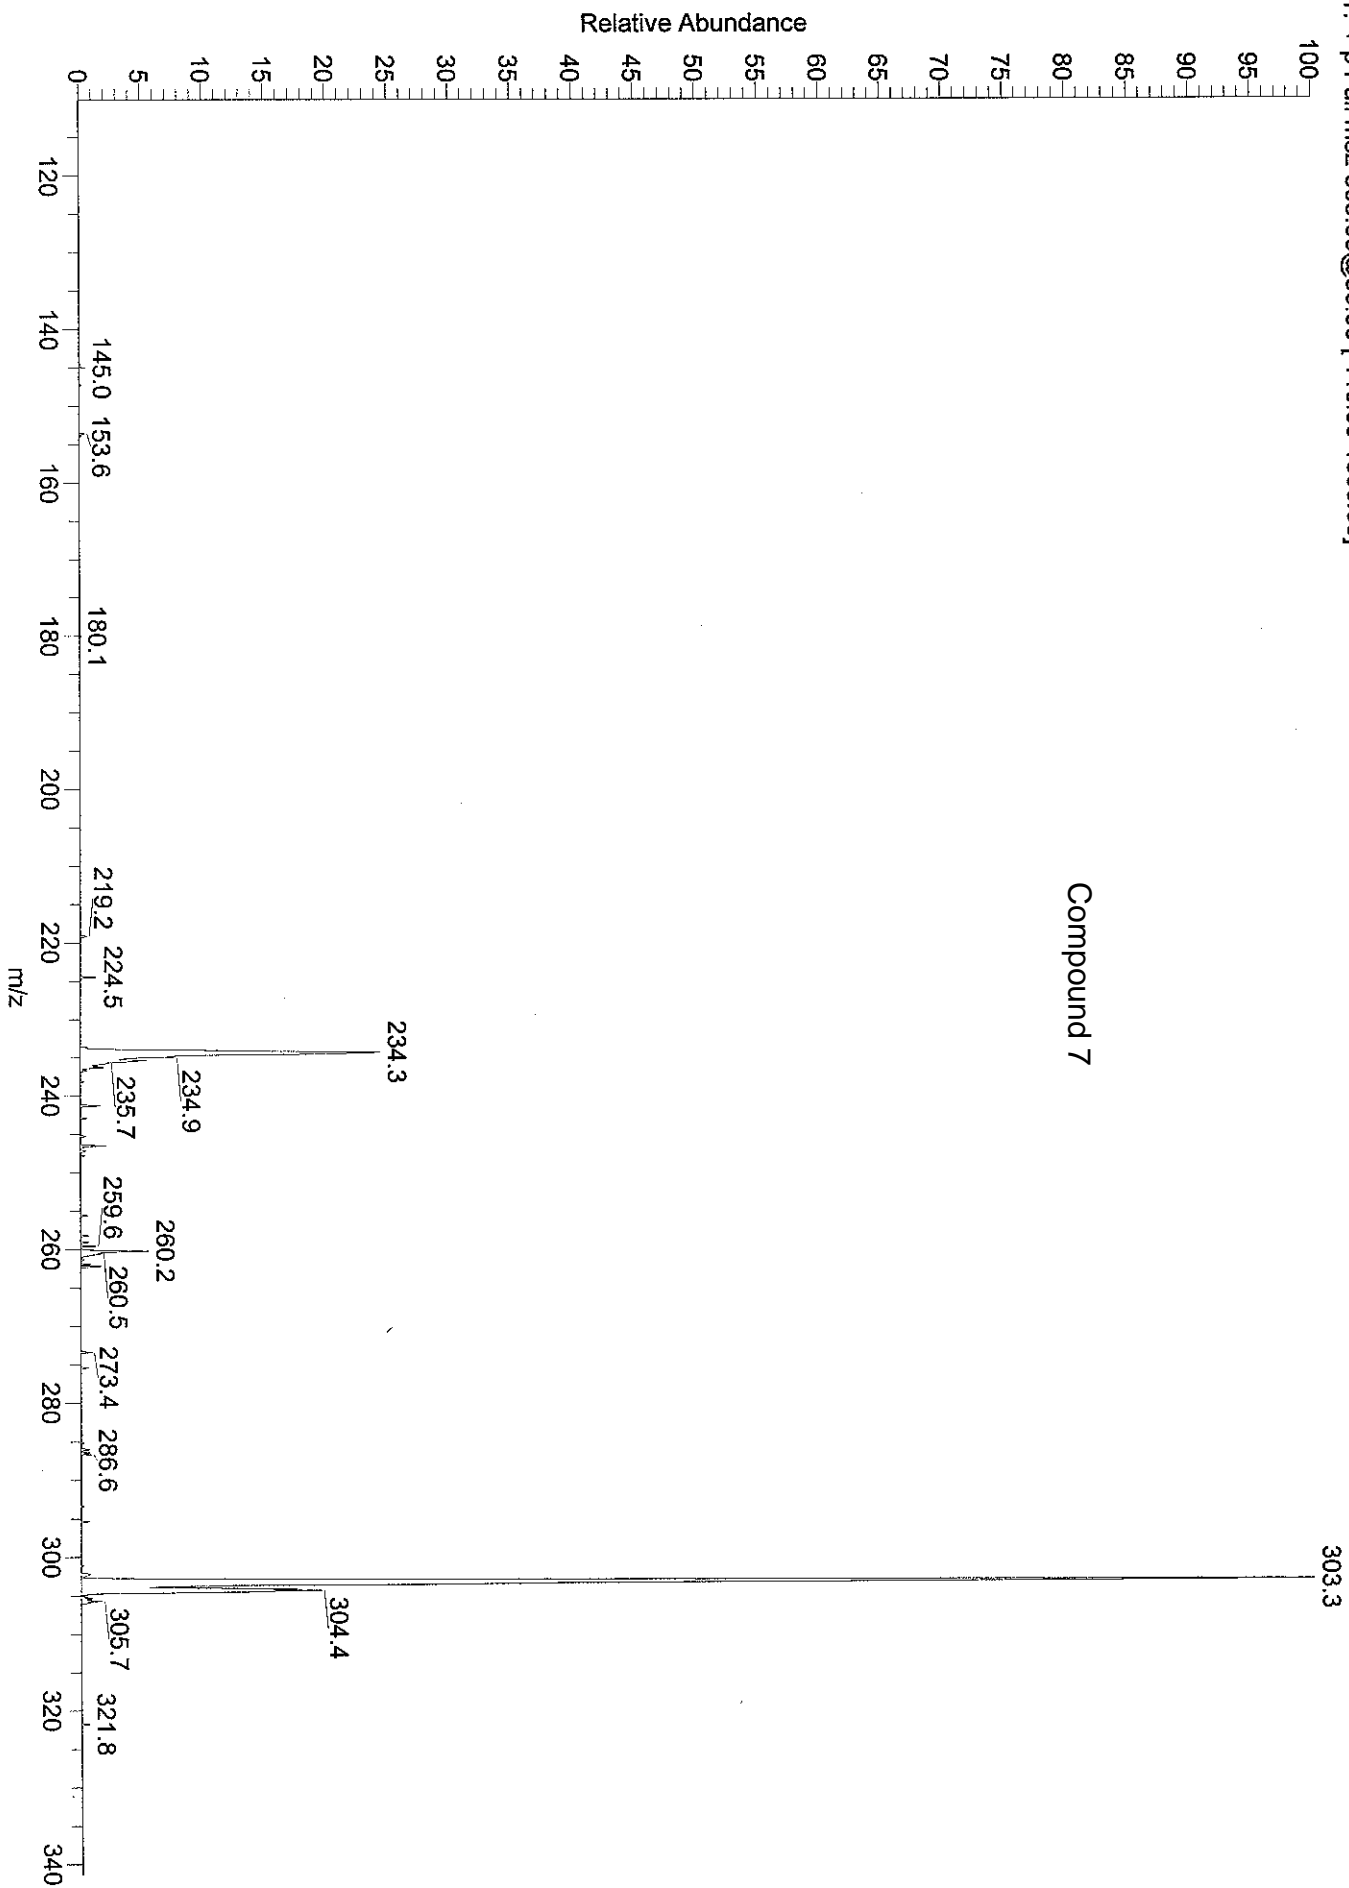

Compound 7

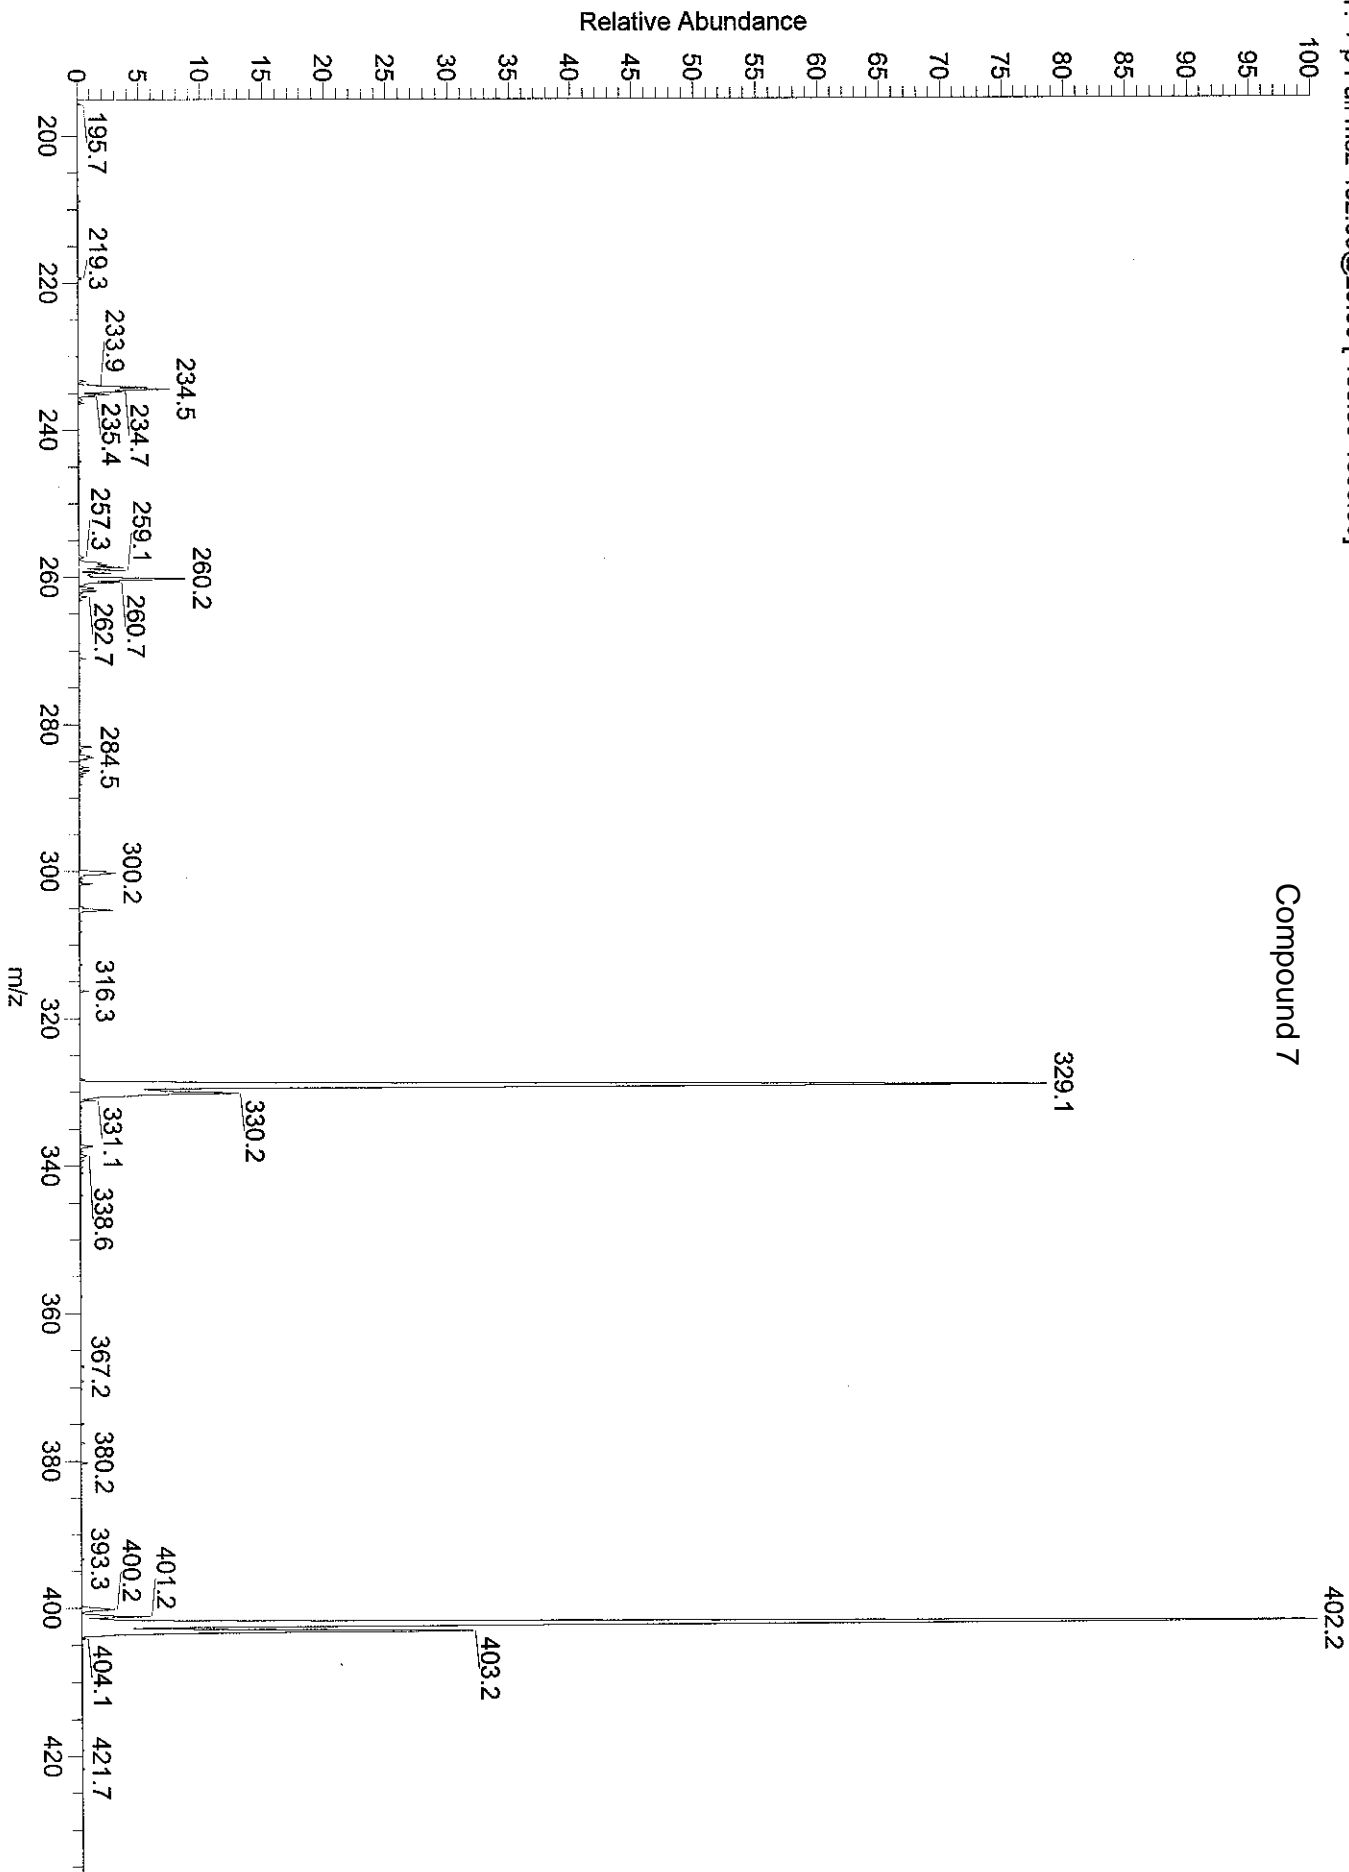

# Generic Display Report

**Analysis Info**  
Analysis Name: D:\DATA\Facility\_Nov\_09\VB-182\_000002.d  
Method: ESI\_101506  
Sample Name: VB-182  
Comment: Venkat B., ACN:H2O 1:1:0.1%FA

Acquisition Date: 11/13/2009 10:17:15 AM  
Operator: apex-Qe  
Instrument: apex-Qe

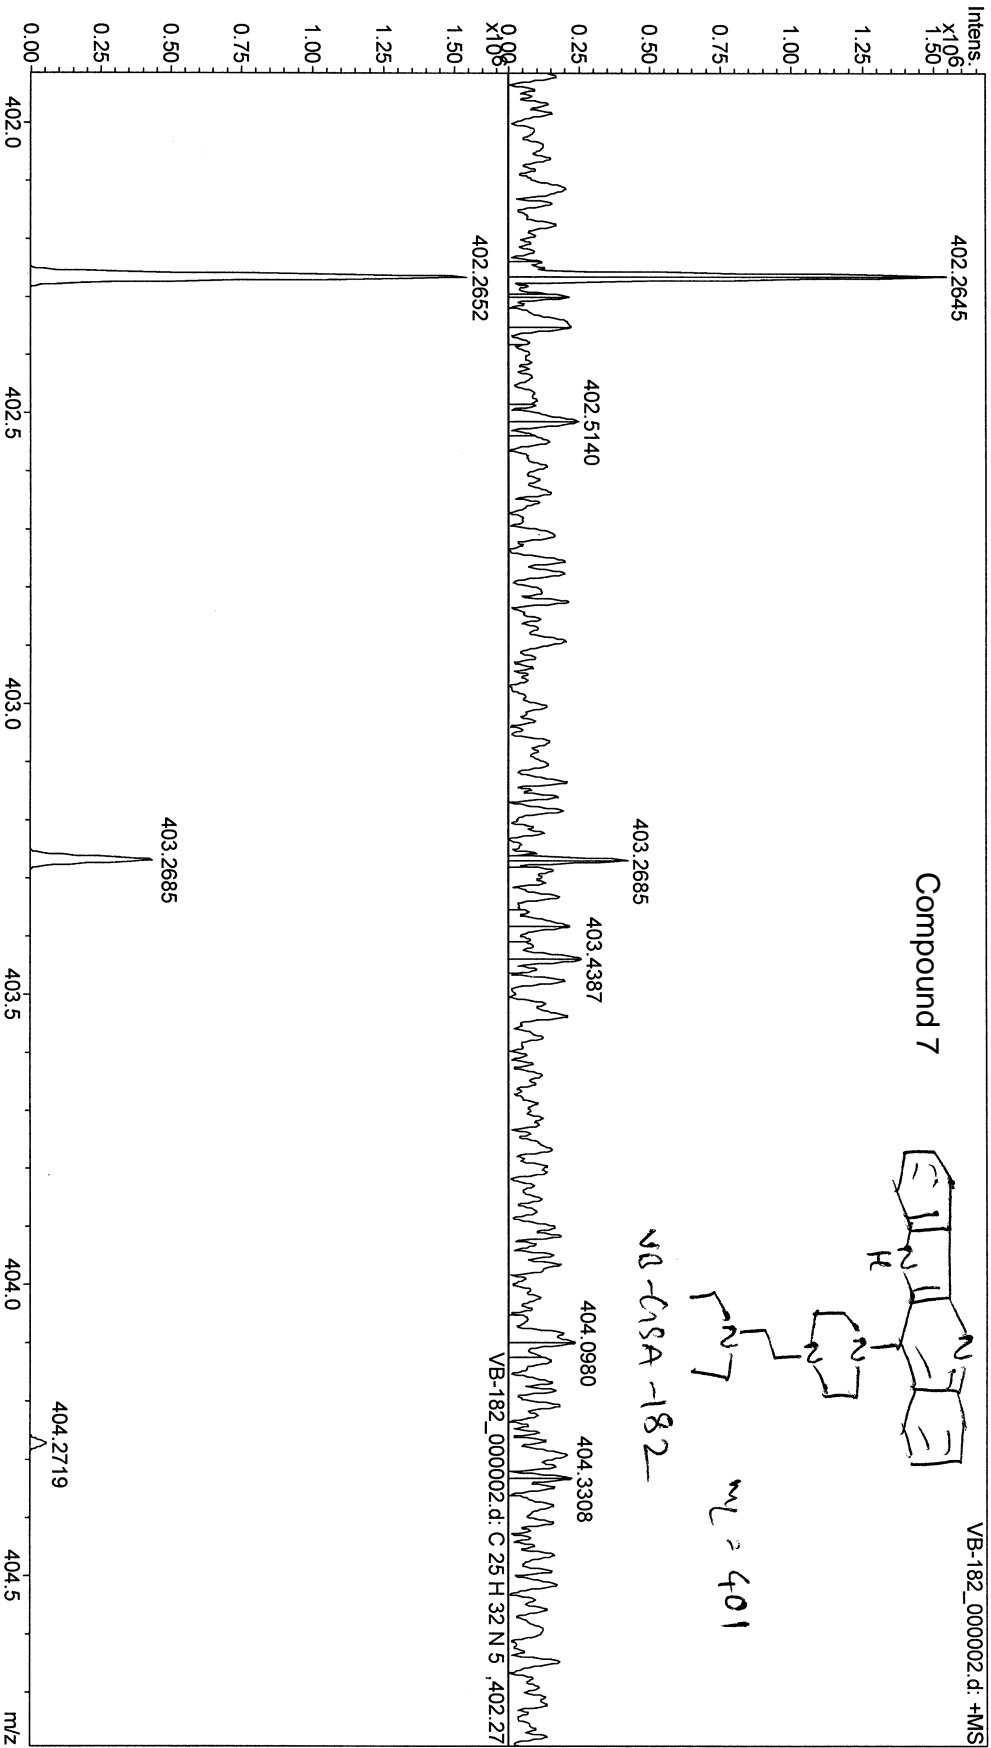

SmartFormula Manually

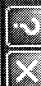

Min C<sub>18</sub>

Generate

Max

C<sub>18</sub>-n

Help

Note: for m < 2000 the elements C, H, N, and O are considered implicitly.

Measured m/z 402.2645 Tolerance 2 mDa Charge 1

| # | Mol. Formula                                                  | m/z      | err [mDa] | lerr [ppm] | err [ppm] | mean err [ppm] | mSigma | Sigma | Rank | rdB | N rule | e <sup>-</sup> |
|---|---------------------------------------------------------------|----------|-----------|------------|-----------|----------------|--------|-------|------|-----|--------|----------------|
| 1 | C <sub>24</sub> H <sub>36</sub> N <sub>2</sub> O <sub>4</sub> | 402.2639 | -0.60     | 1.5        | -1.5      | -1.9           | 24.9   | 1     | 7.5  | 1   | 7.5    | ok even        |
| 2 | C <sub>25</sub> H <sub>32</sub> N <sub>5</sub>                | 402.2652 | 0.73      | 1.8        | 1.8       | 1.4            | 26.0   | 2     | 12.5 | 2   | 12.5   | ok even        |

Compound 7

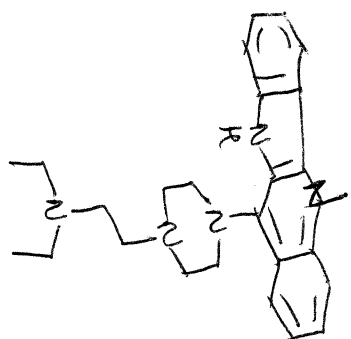

Automatically locate monoisotopic peak Maximum number of formulas 500

Check rings plus double bonds Minimum -0.5 Maximum 40

Filter H/C element ratio Minimum H/C 0 Maximum H/C 3 Electron configuration even

Estimate carbon number  Generate immediately

Show Pattern

Compound 8

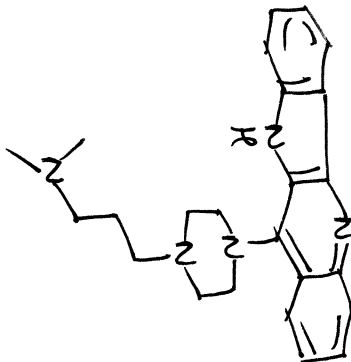

VB-GSA-0259

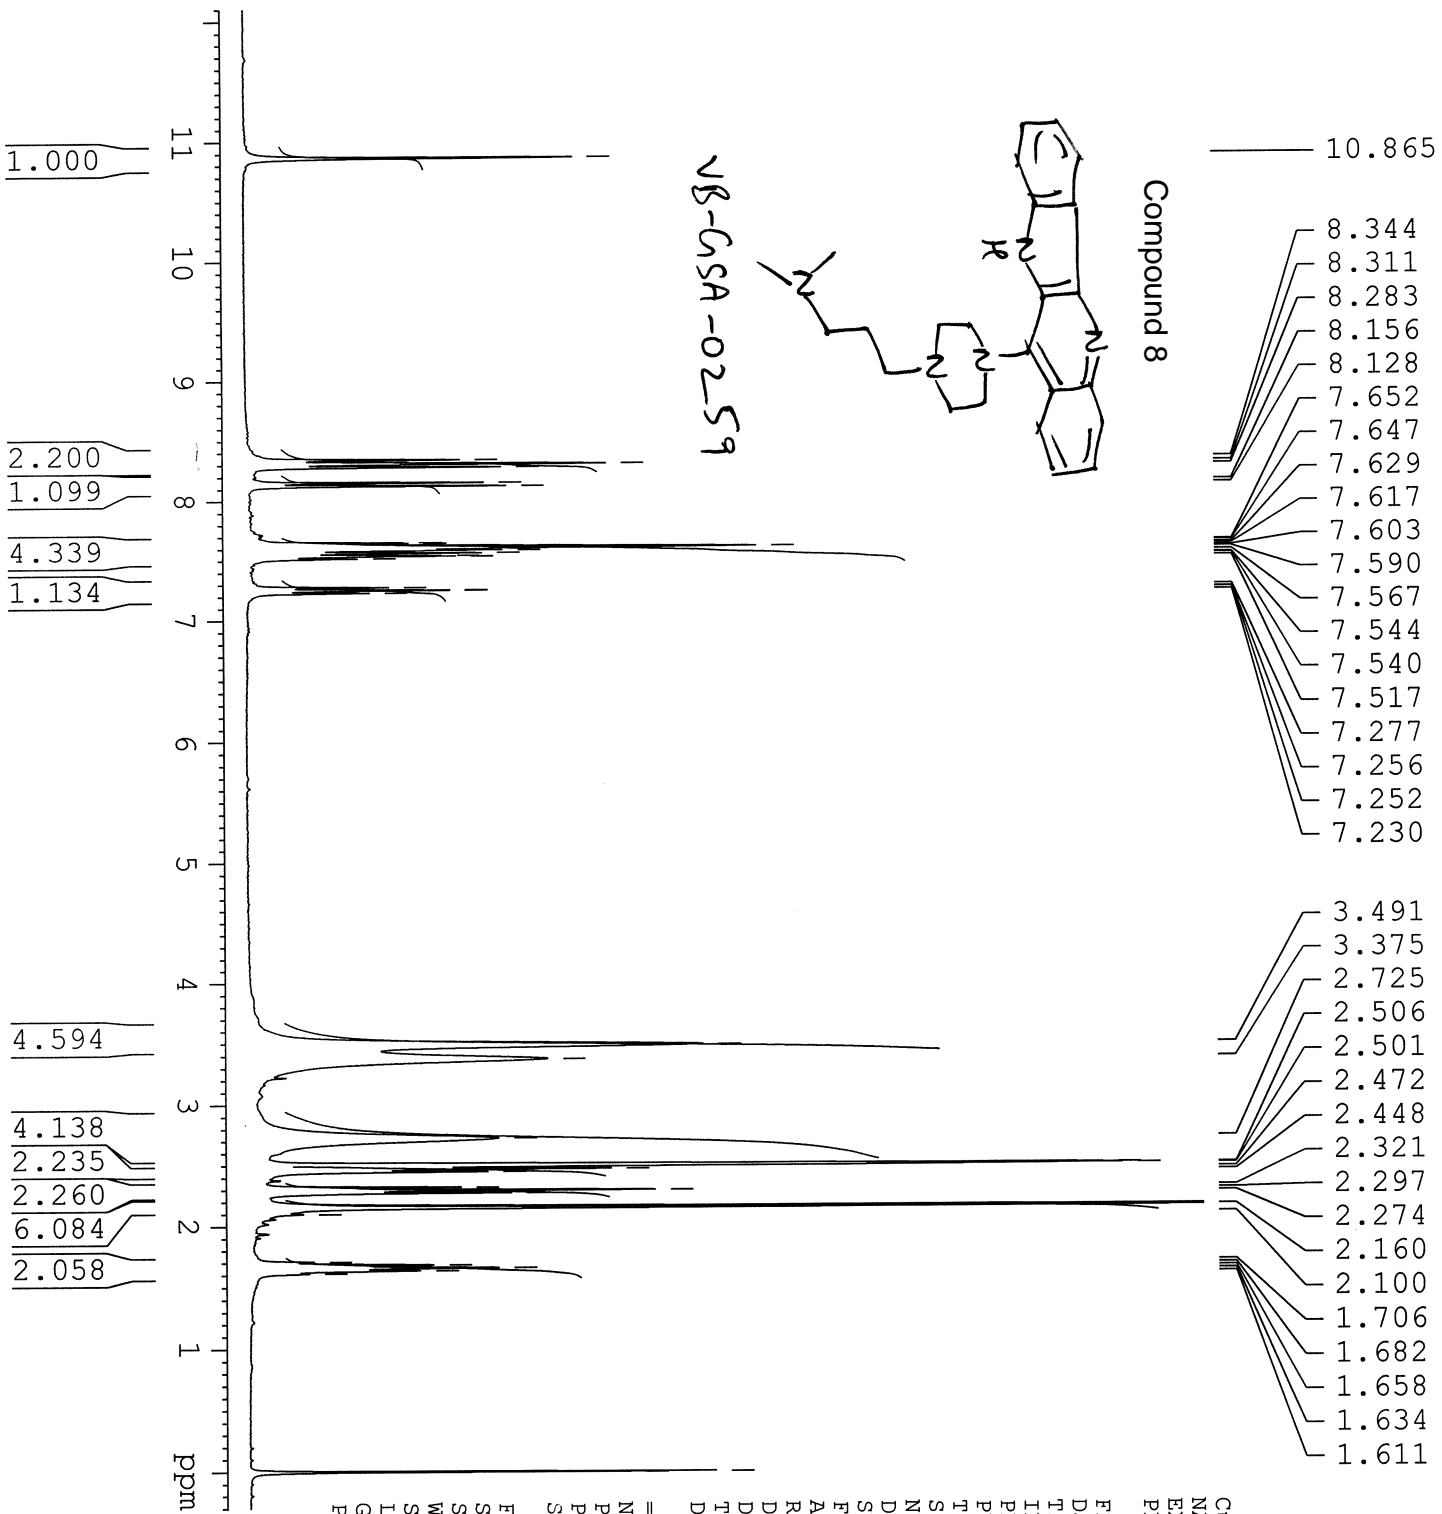

Current Data Parameters  
 NAME VB-GSA-0259  
 EXPNO 4  
 PROCNO 1

F2 - Acquisition Parameters

Date\_ 20100802  
 Time 10.26  
 INSTRUM spect  
 PROBHD 5 mm QNP  
 PULPROG zg30  
 TD 65536  
 SOLVENT DMSO  
 NS 64  
 DS 2  
 SWH 6172.839 Hz  
 FIDRES 0.094190 Hz  
 AQ 5.3084660 sec  
 RG 362  
 DW 81.000 usec  
 DE 6.00 usec  
 TE 300.0 K  
 D1 1.00000000 sec

==== CHANNEL f1 =====

NUC1 1H  
 P1 8.50 usec  
 PL1 0.00 dB  
 SF01 300.1318534 MHz  
 F2 - Processing parameters  
 SI 32768  
 SF 300.1300000 MHz  
 WDW EM  
 SSB 0  
 LB 0.30 Hz  
 GB 0  
 PC 1.40

Current Data Parameters  
 NAME VB-GSA-0259  
 EXPNO 1019  
 PROCNO 1

F2 - Acquisition Parameters

Date\_ 20100810  
 Time\_ 10.03  
 INSTRUM spect  
 PROBHD 5 mm QNP 1H/1  
 PULPROG zgpg30  
 TD 65536  
 SOLVENT DMSO  
 NS 16000  
 DS 4  
 SWH 17985.611 Hz  
 FIDRES 0.274439 Hz  
 AQ 1.8219508 sec  
 RG 1024  
 DM 27.800 usec  
 DE 6.00 usec  
 TE 300.0 K  
 D1 2.0000000 sec  
 d11 0.0300000 sec  
 d12 0.0000200 sec

==== CHANNEL F1 =====  
 NUC1 13C  
 P1 6.00 usec  
 PL1 2.00 dB  
 SFO1 75.4752653 MHz

==== CHANNEL F2 =====  
 CPDPRG2 waltz16  
 NUC2 1H  
 PCPD2 80.00 usec  
 PL2 0.00 dB  
 PL12 19.47 dB  
 PL13 19.00 dB  
 SFO2 300.1312005 MHz

F2 - Processing parameters  
 SI 32768  
 SF 75.4677190 MHz  
 WDW EM  
 SSB 0  
 LB 1.00 Hz  
 GB 0  
 PC 1.40

- 148.183
- 145.829
- 144.822
- 136.768
- 130.285
- 129.900
- 127.241
- 127.000
- 125.083
- 124.292
- 124.140
- 122.112
- 121.931
- 120.193
- 112.903

Compound 8

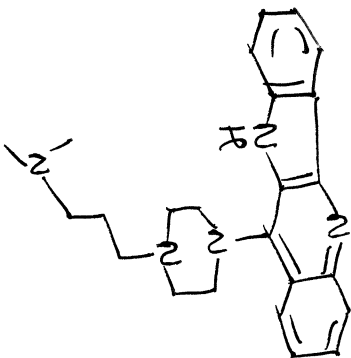

VB-GSA-0259

- 58.209
- 57.118
- 54.515
- 51.595
- 46.095
- 41.214
- 40.935
- 40.657
- 40.379
- 40.102
- 39.824
- 39.545
- 25.410

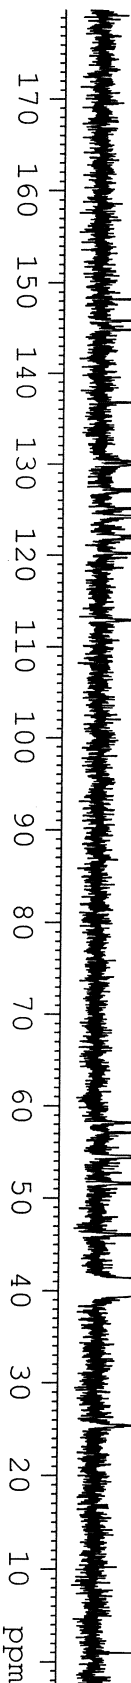

=====  
Injection Date : 8/9/2010 1:40:08 PM  
Sample Name : VB-GSA-0259 Location : Vial 1  
Acq. Operator : Karen Inj : 1  
Acq. Instrument : Instrument 1 Inj Volume : 0.1 µl  
Method : C:\HPCHEM\1\METHODS\LC\_MS.M  
Last changed : 8/9/2010 1:39:00 PM by Karen  
Zorbax SB C18, 150 x 4.6, 3.5µ, 25:75:0.25, MeOH/H2O/formic, POS, 150-500; frag 100; 25C, cap  
volt 1500, gas temp 325; drying gas 10  
=====

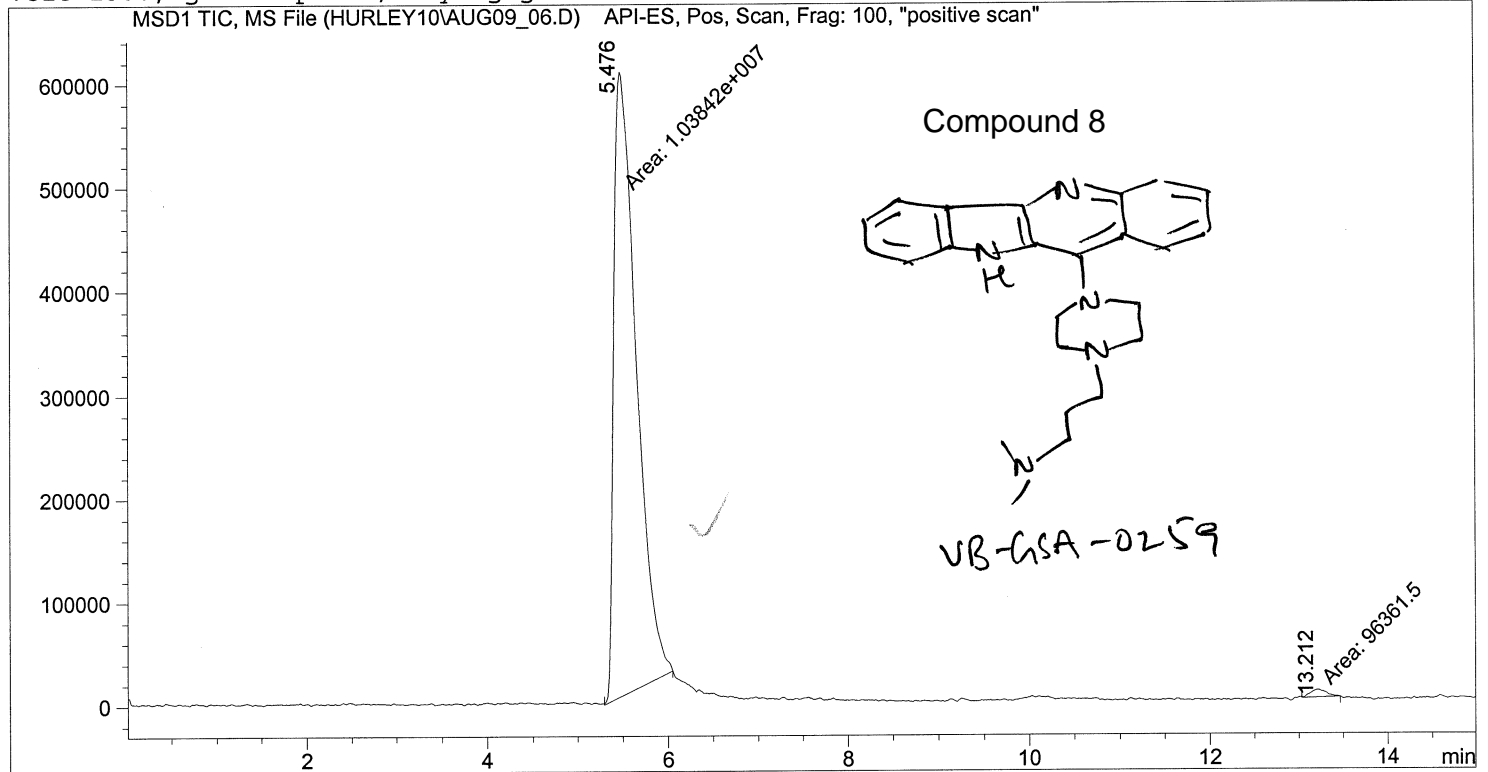

=====  
Area Percent Report  
=====

Sorted By : Signal  
Multiplier : 1.0000  
Dilution : 1.0000  
Use Multiplier & Dilution Factor with ISTDs

Signal 1: MSD1 TIC, MS File

| Peak # | RetTime [min] | Type | Width [min] | Area      | Height     | Area %  |
|--------|---------------|------|-------------|-----------|------------|---------|
| 1      | 5.476         | MM   | 0.2862      | 1.03842e7 | 6.04644e5  | 99.0806 |
| 2      | 13.212        | MM   | 0.2124      | 9.63615e4 | 7560.06982 | 0.9194  |

Totals : 1.04806e7 6.12204e5

=====  
\*\*\* End of Report \*\*\*



=====  
 Injection Date : 8/9/2010 1:40:08 PM  
 Sample Name : VB-GSA-0259 Location : Vial 1  
 Acq. Operator : Karen Inj : 1  
 Acq. Instrument : Instrument 1 Inj Volume : 0.1 µl  
 Method : C:\HPCHEM\1\METHODS\LC\_MS.M  
 Last changed : 8/9/2010 1:39:00 PM by Karen  
 Zorbax SB C18, 150 x 4.6, 3.5µ, 25:75:0.25, MeOH/H2O/formic, POS, 150-500; frag 100; 25C,  
 cap volt 1500, gas temp 325; drying gas 10

Current Chromatogram(s)

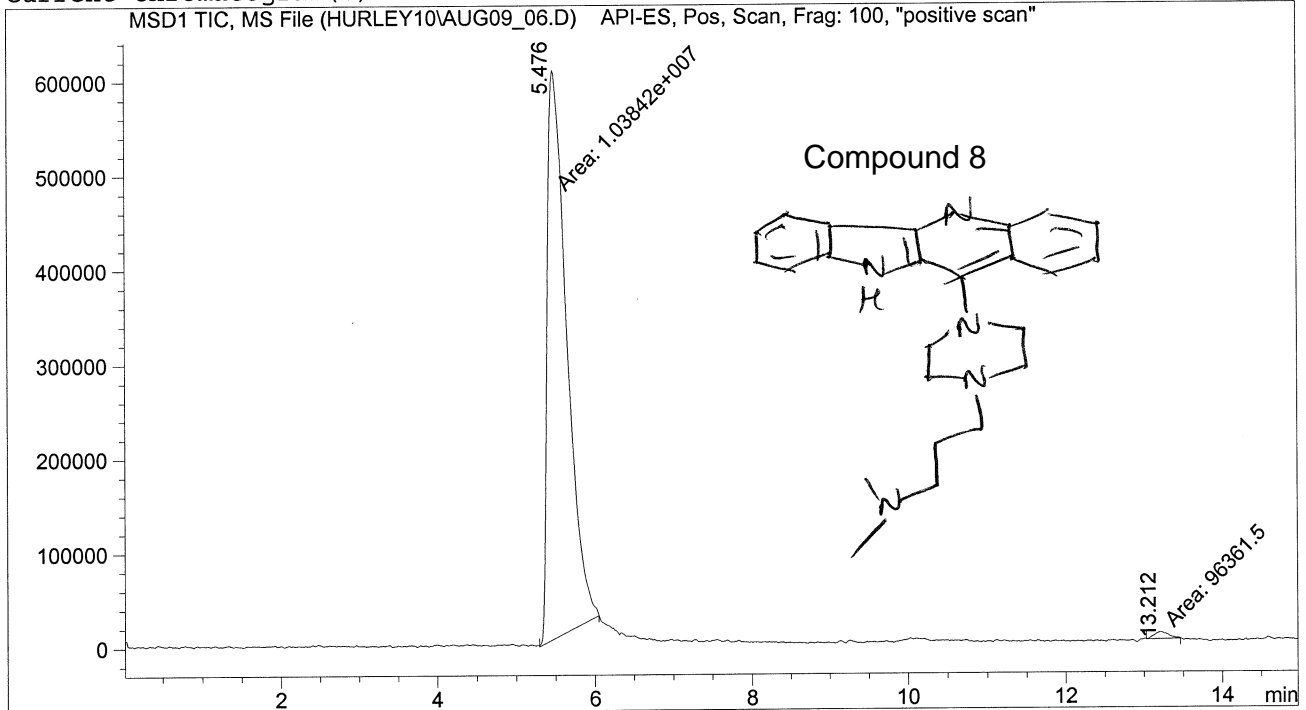

MS Spectrum

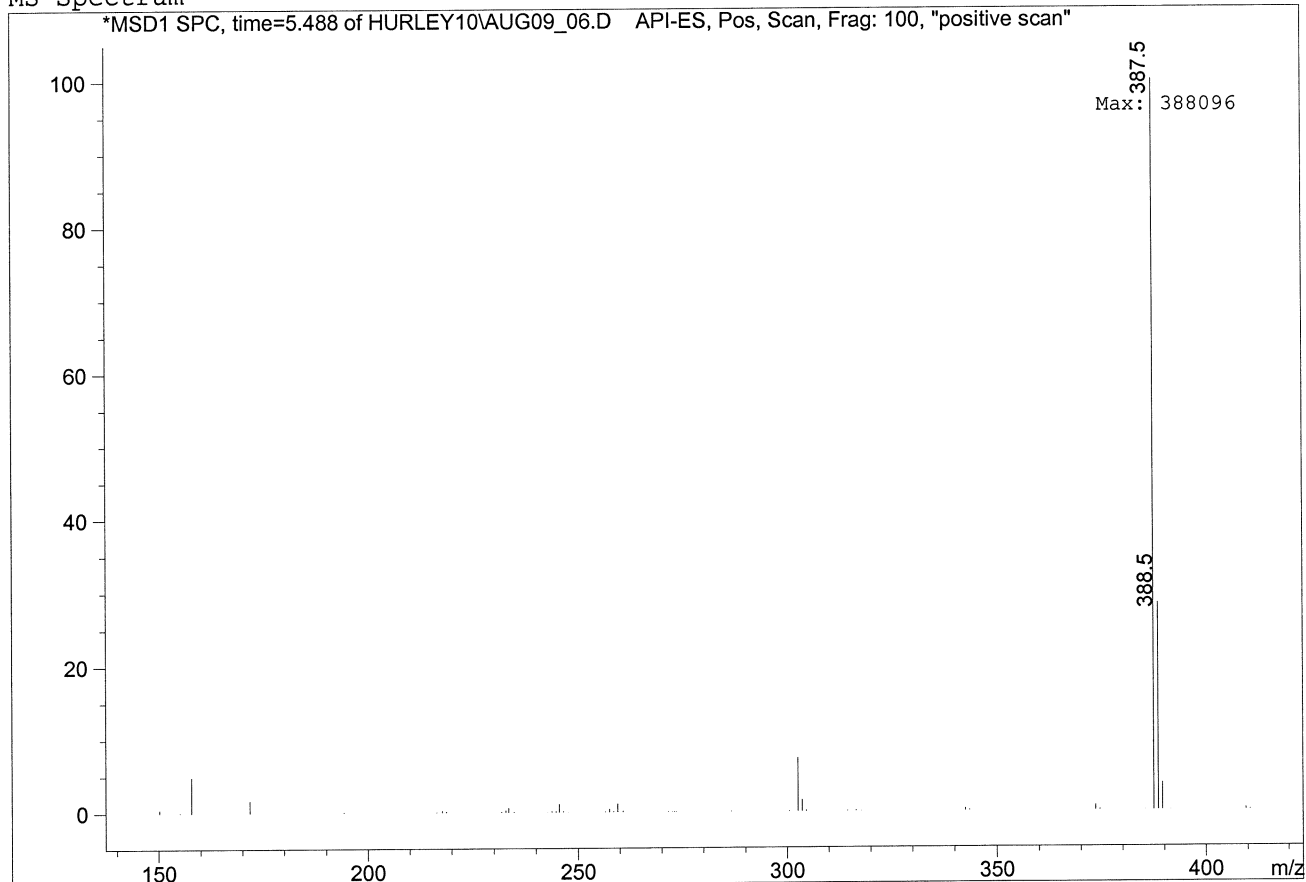

VB-0259 #39-41 RT: 1.19-1.25 AV: 3 NL: 4.56E6  
T: + p Full ms [50.00-1500.00]  
99 194.7

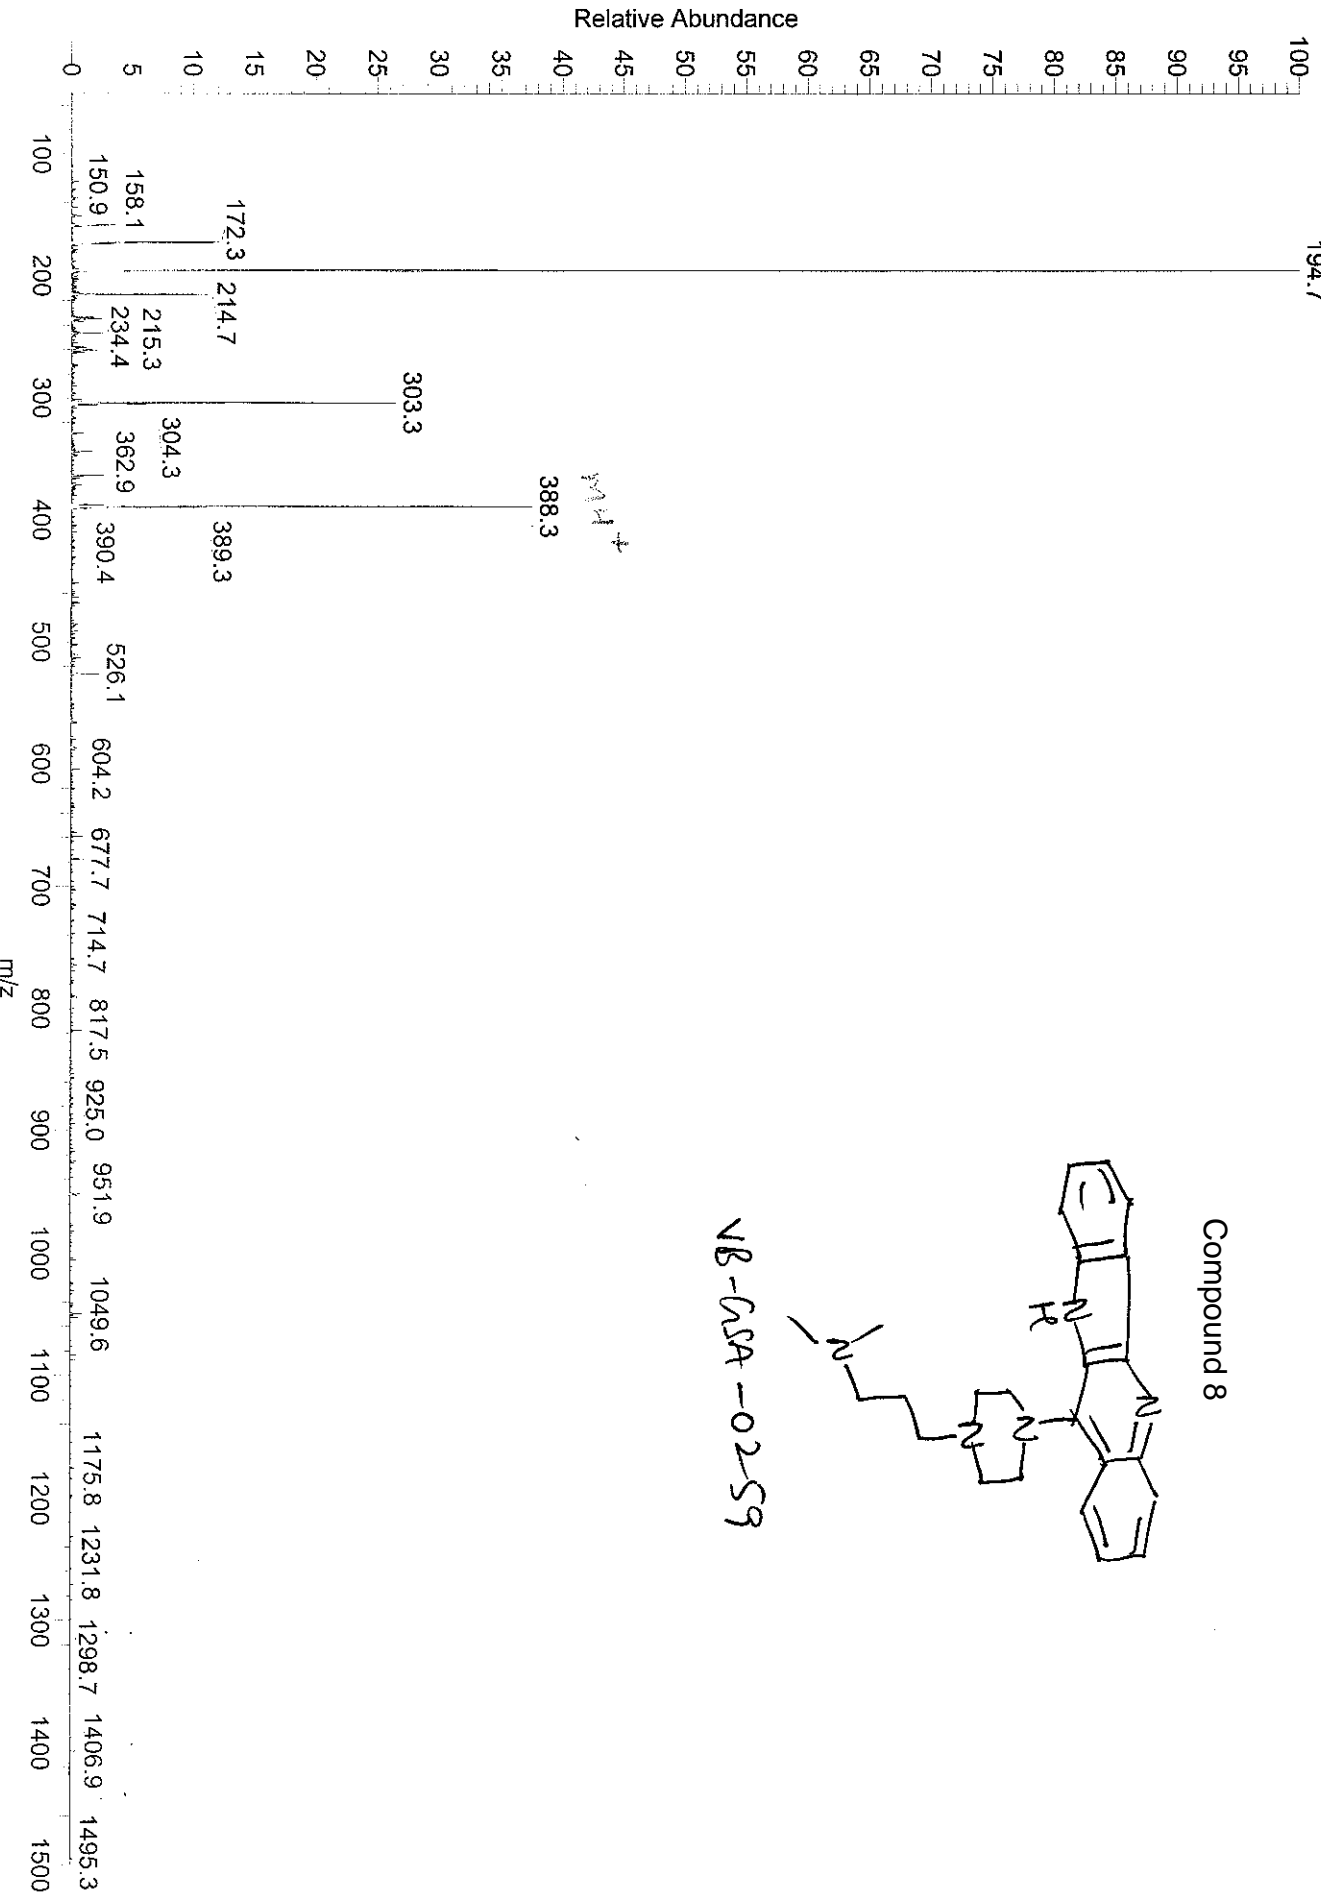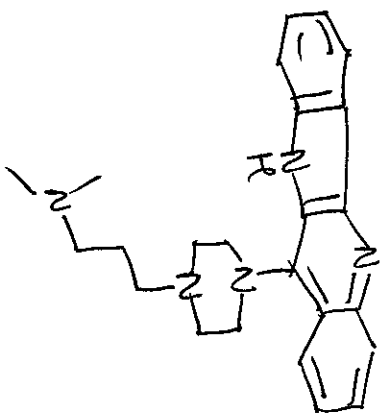

VB-GSA-0259

VB-0259 #39-41 RT: 1.19-1.25 AV: 3 NL: 4.56E6  
T: + p Full ms [50.00-1500.00]

Compound 8

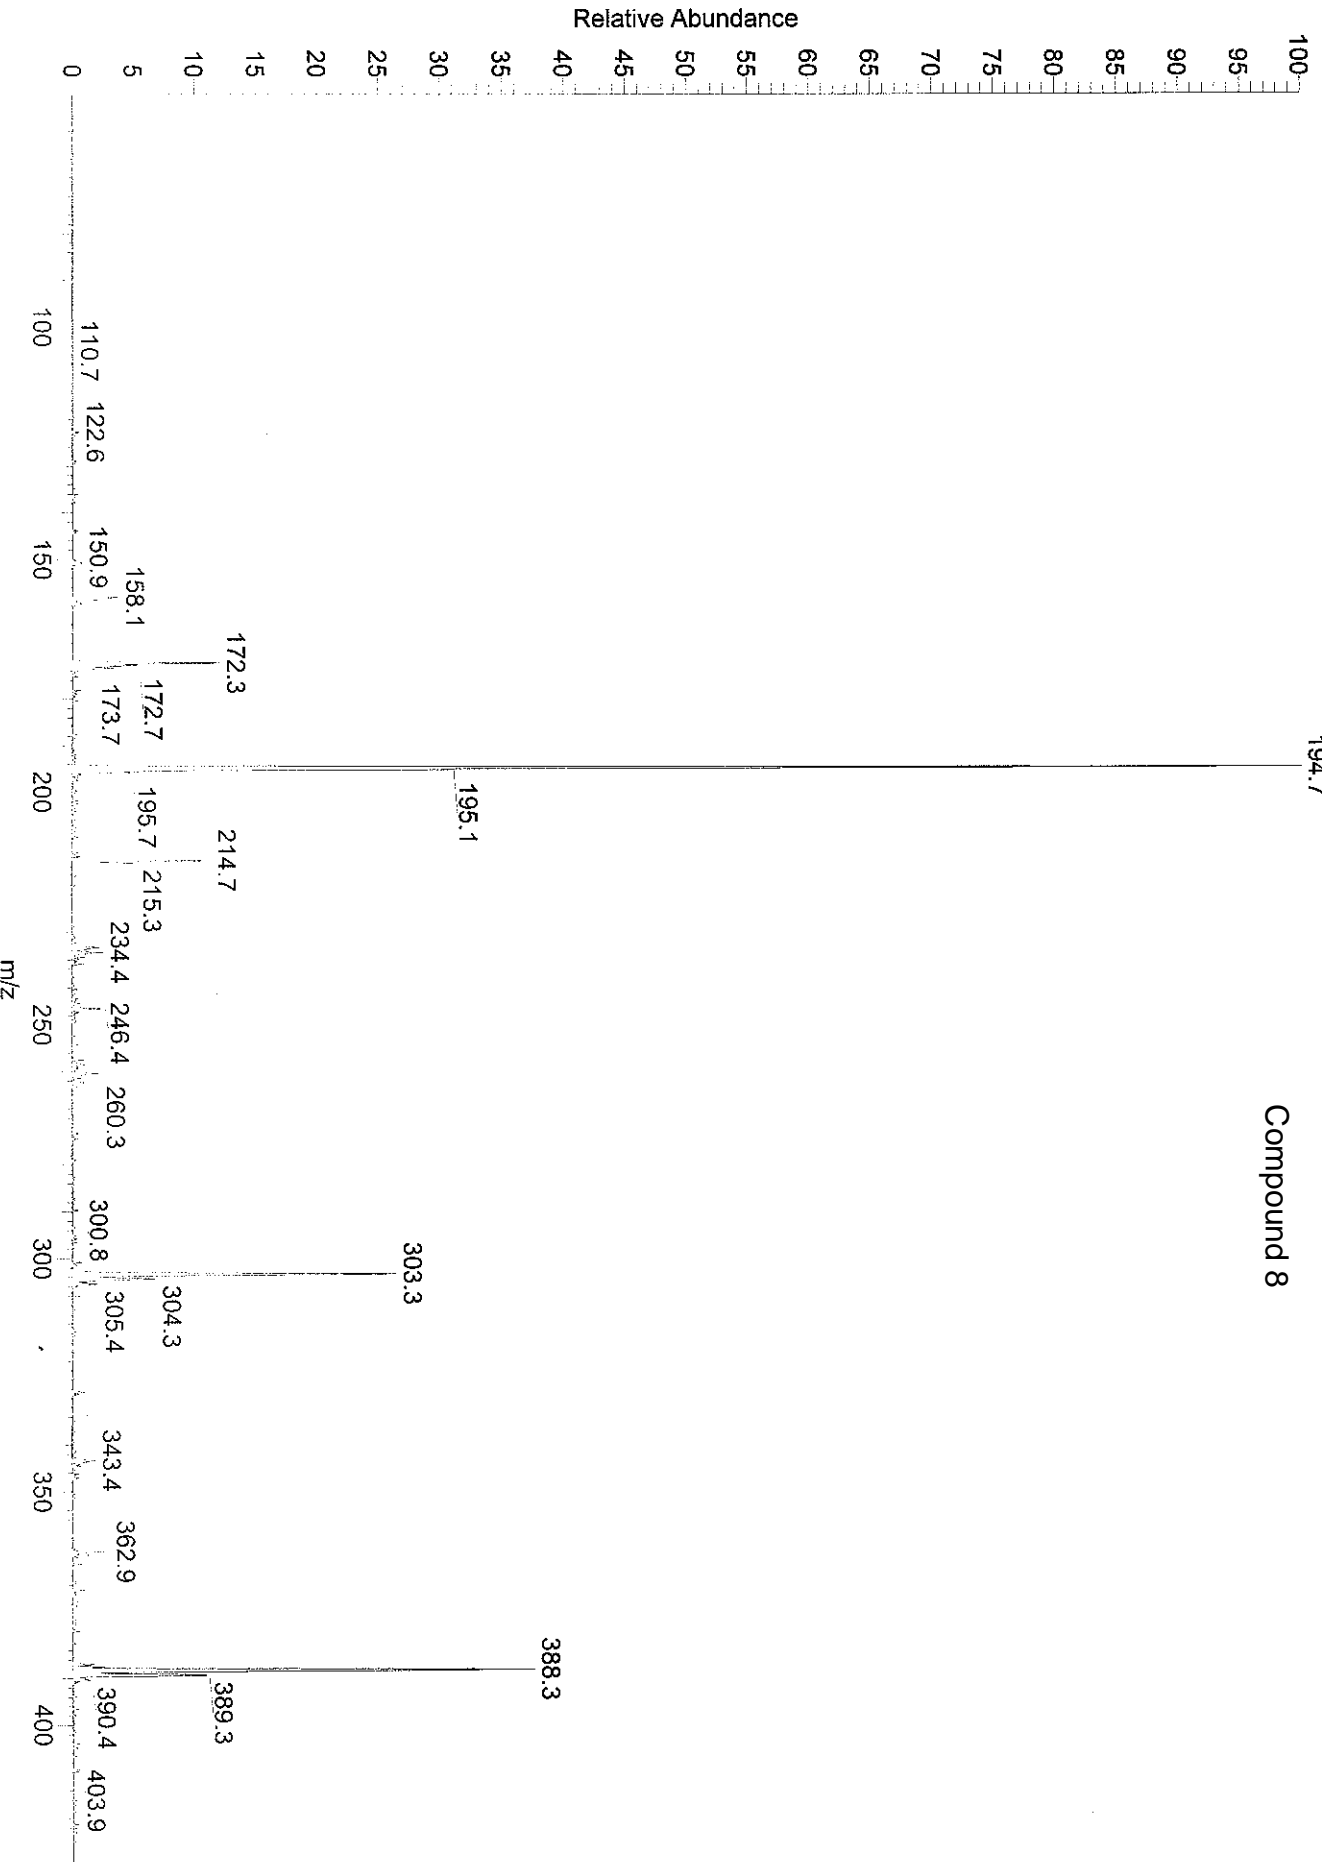

VB-0259 #8-9 RT: 0.24-0.27 AV: 2 NL: 6.21E4  
T: + p Full ms2 388.40@30.00 [95.00-1500.00]

Compound 8

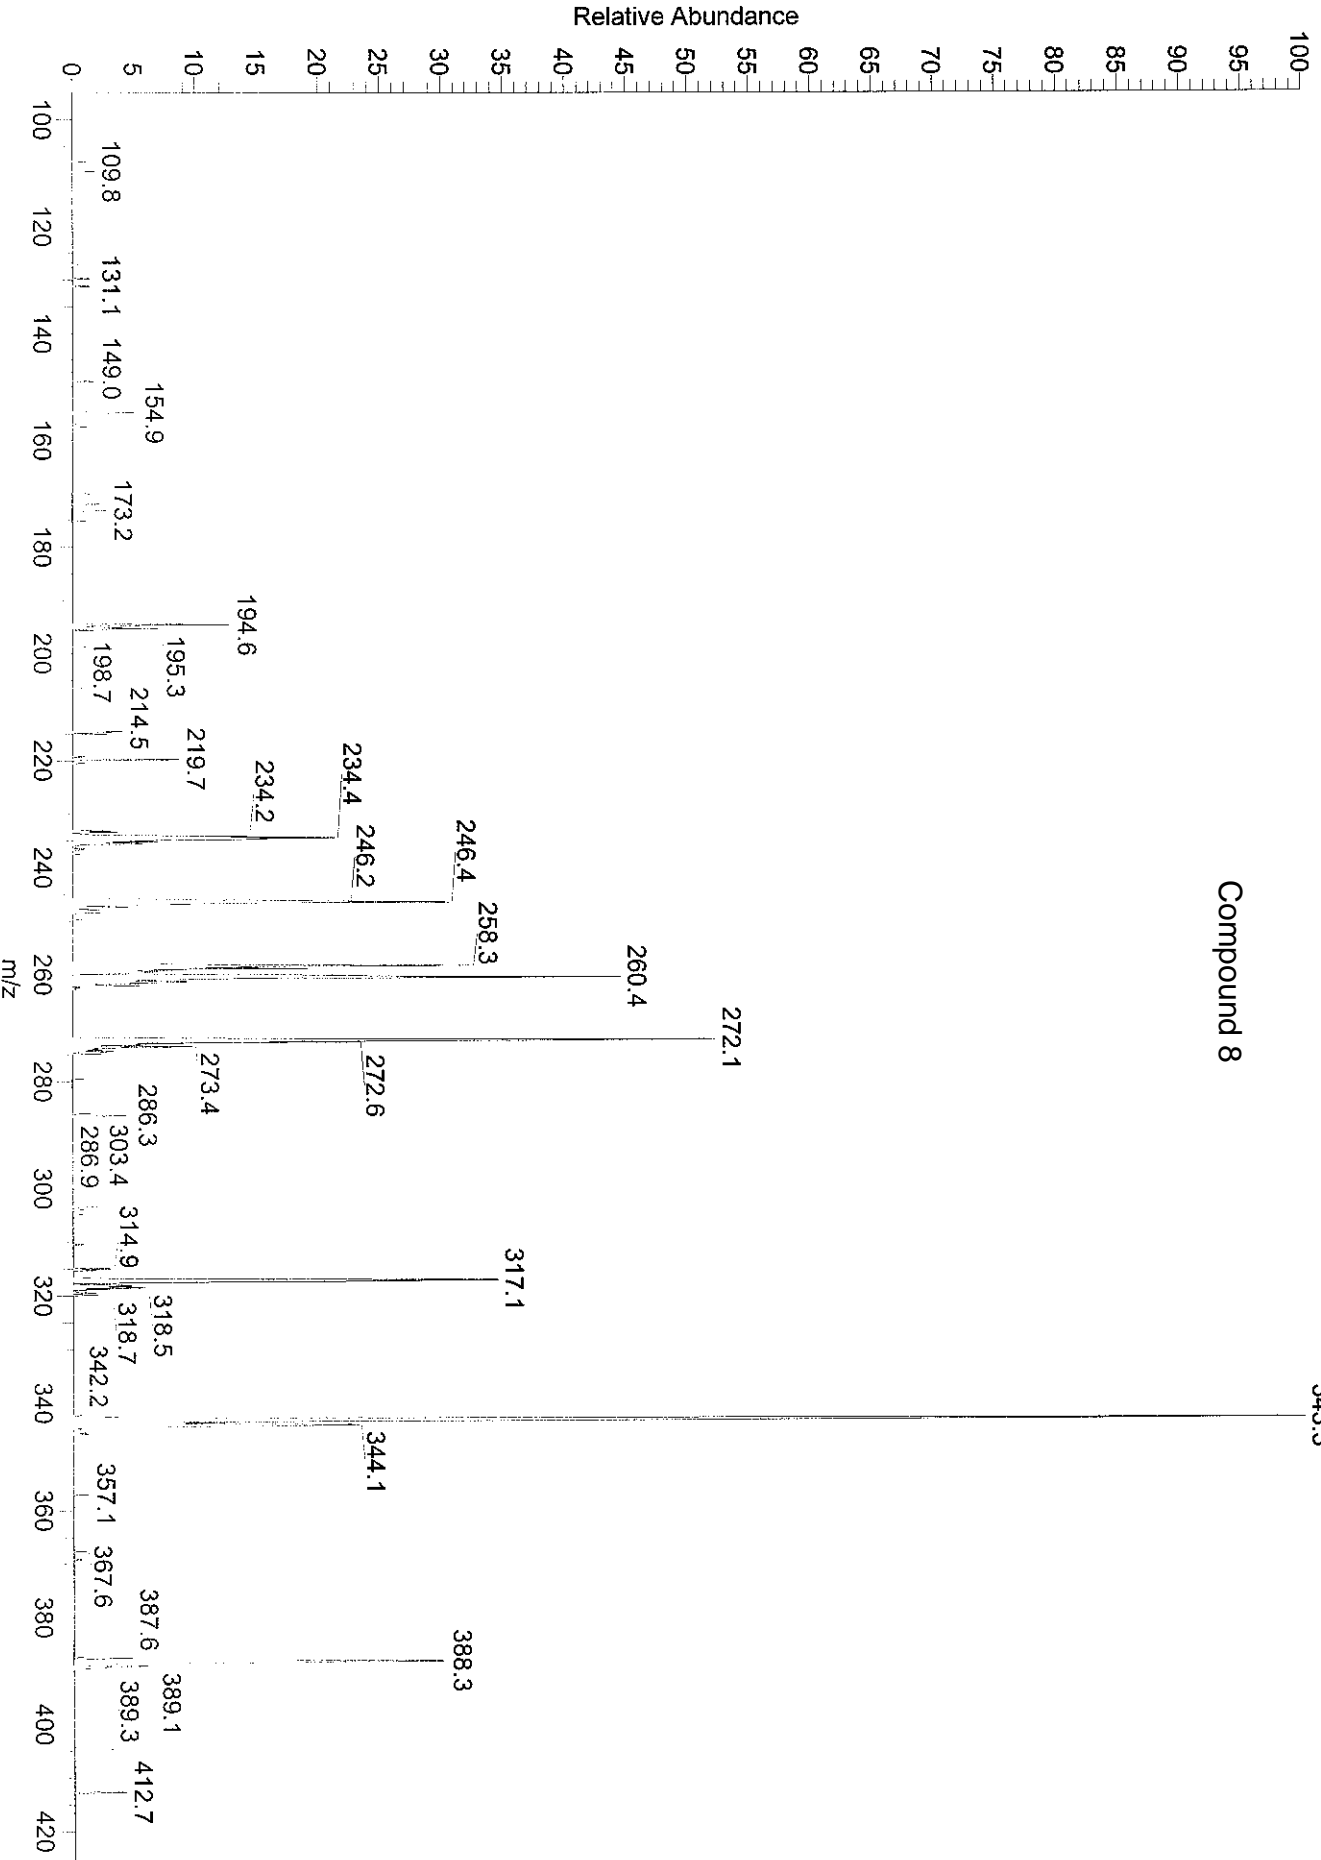

E:\MSLab\_LCQ\VB-0259  
Verkat B, ACN:MeOH 1:1  
VB-0259 #28-33 RT: 0.85-1.00 AV: 6 NL: 4.91E3  
T: - p Full ms [50.00-1500.00]

08/11/2010 09:44:40 AM

VB-0259

*ms*  
386.4

### Compound 8

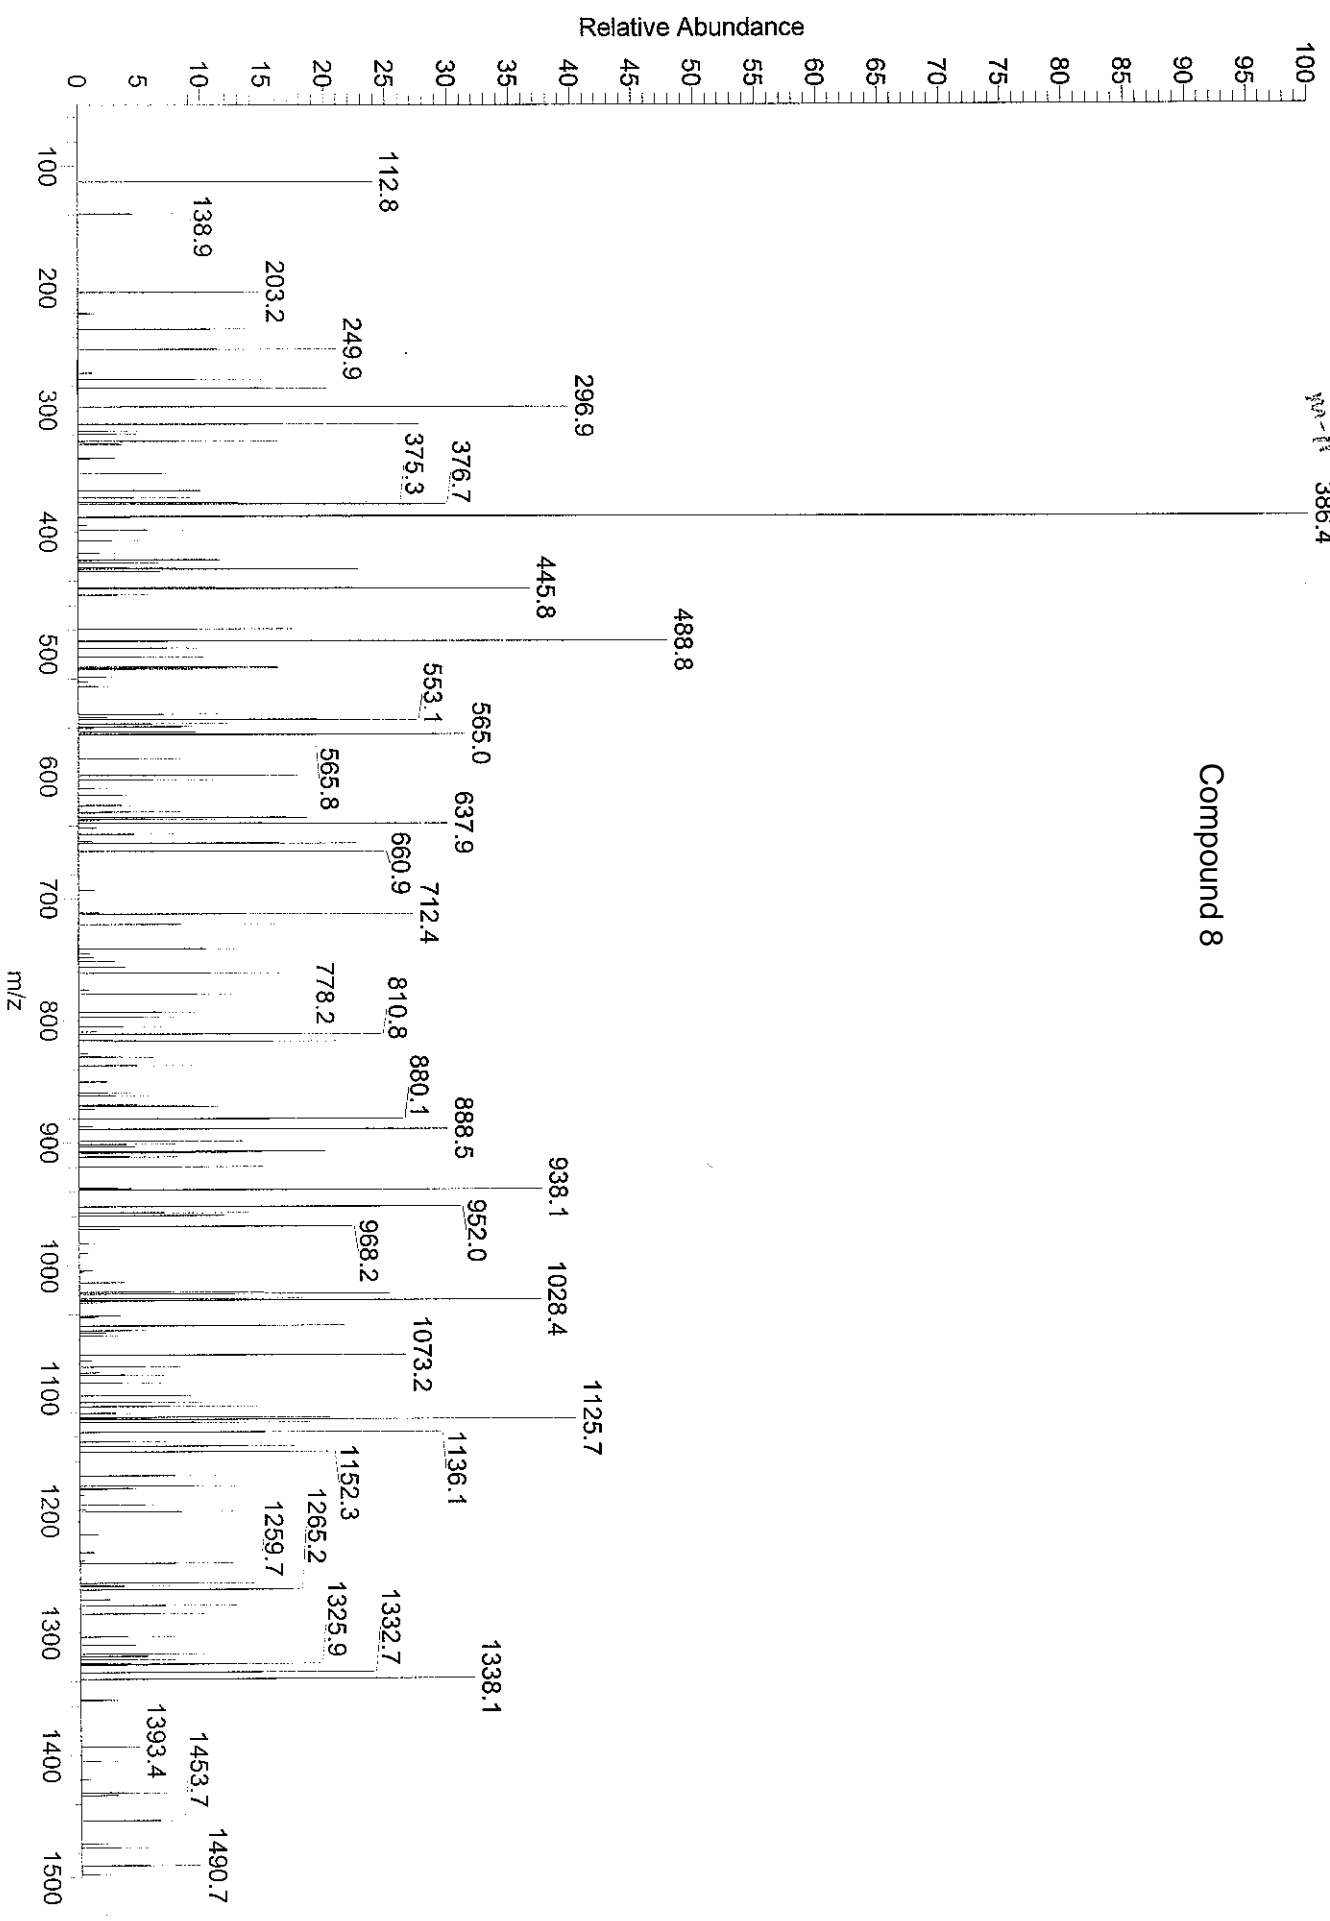

# Generic Display Report

**Analysis Info**  
Analysis Name: D:\DATA\Facility\_Aug\_10\VB-0259\_000002.d  
Method: ESI\_101506  
Sample Name: VB-0259  
Comment: Venkat B., positive mode, ACN:H2O 1:1.0:1%FA

Acquisition Date: 8/11/2010 11:07:25 AM  
Operator:  
Instrument: apex-Ultra

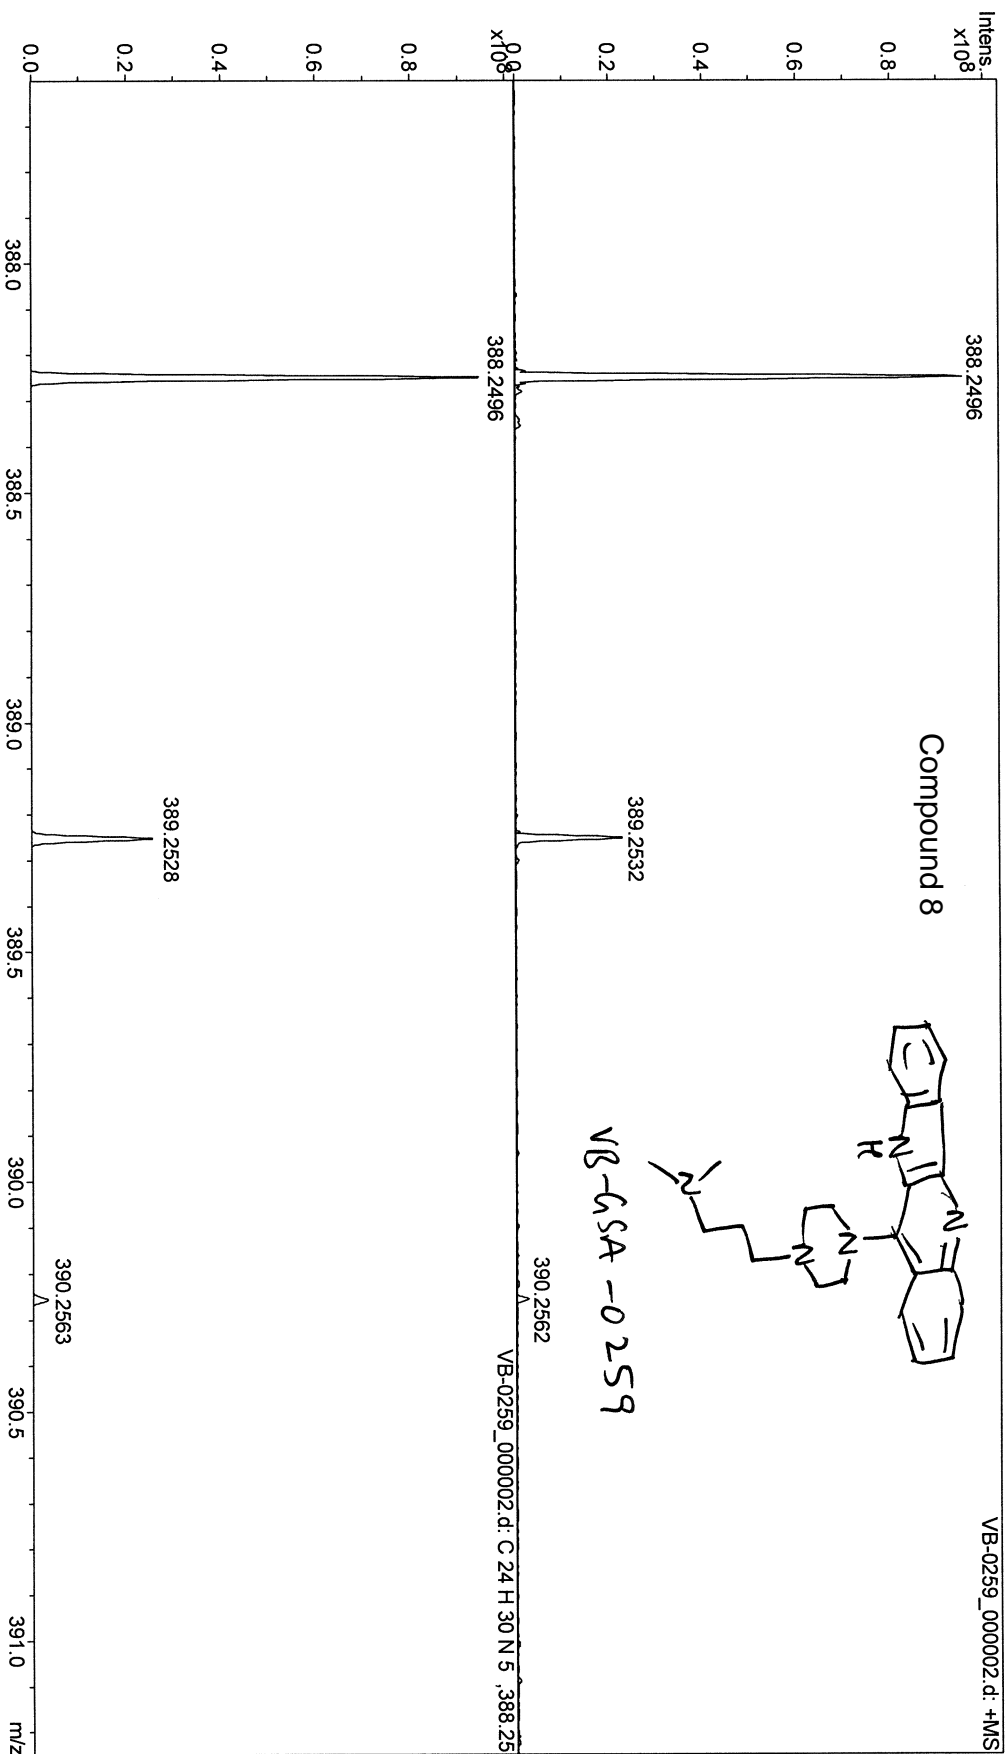

## SmartFormula Manually

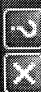

Min

C<sub>16</sub>

Generate

Max

C<sub>16</sub>-n

Help

Note: for m &lt; 2000 the elements C, H, N, and O are considered implicitly.

Measured m/z

388.2496

Tolerance

2

mDa

Charge

1

| Meas. m/z | #                                                             | Formula                                        | Score    | m/z      | err [mDa] | err [ppm] | mSigma | rdb  | e <sup>-</sup> Conf | N-Rule |
|-----------|---------------------------------------------------------------|------------------------------------------------|----------|----------|-----------|-----------|--------|------|---------------------|--------|
| 388.2496  | 2                                                             | C <sub>24</sub> H <sub>30</sub> N <sub>5</sub> | 100.00   | 388.2496 | -0.0      | -0.1      | 22.1   | 12.5 | even                | ok     |
| 1         | C <sub>23</sub> H <sub>34</sub> N <sub>4</sub> O <sub>4</sub> | 62.33                                          | 388.2482 | -1.4     | -3.6      | 11.2      | 7.5    | even | ok                  |        |

Compound 8

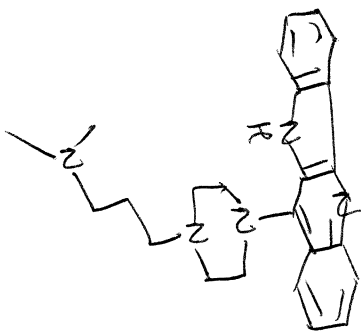 Automatically locate monoisotopic peak

Maximum number of formulas

500

 Check rings plus double bonds

Minimum

-0.5

Maximum

40

Electron configuration

even

 Filter H/C element ratio

Minimum H/C

0

Maximum H/C

3

 Estimate carbon number Generate immediately

Show Pattern

Standard 1D 1H Spectrum  
DRX-500 5mm BBO Probe

- 10.87
- 8.348
- 8.331
- 8.309
- 8.294
- 8.157
- 8.140
- 7.650
- 7.647
- 7.644
- 7.637
- 7.634
- 7.628
- 7.620
- 7.618
- 7.613
- 7.599
- 7.598
- 7.583
- 7.567
- 7.565
- 7.551
- 7.537
- 7.535
- 7.277
- 7.261
- 7.247
- 3.502
- 3.449
- 3.436
- 3.423
- 3.340
- 2.740
- 2.530
- 2.515
- 2.510
- 2.507
- 2.502
- 1.808
- 1.795
- 1.781
- 1.767
- 1.753

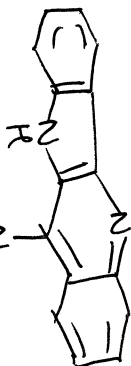

Compound 9

VB-GSA-0217  
MeO

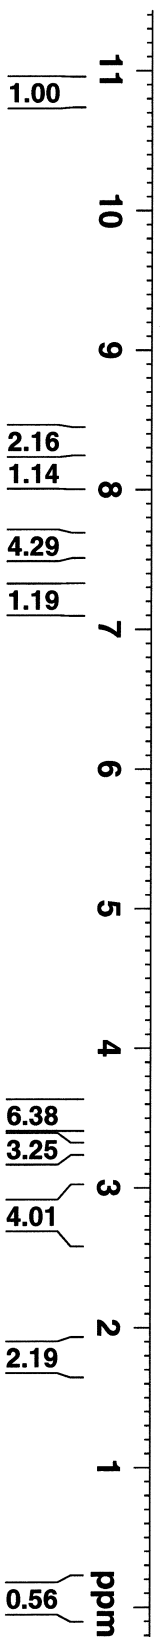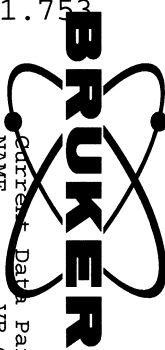

Current Data Parameters  
 NAME VB-GSA-0217  
 EXPNO 100  
 PROCNO 1

F2 - Acquisition Parameters  
 Date\_ 20091223  
 Time 11.45  
 INSTRUM spect  
 PROBHD 5 mm BBO BB-1H  
 PULPROG zg30  
 TD 32768  
 SOLVENT DMSO  
 NS 16  
 DS 4  
 SMH 6250.000 F  
 FIDRES 0.190735 F  
 AQ 2.6215701 s  
 RG 203.2  
 DW 80.000 u  
 DE 6.00 u  
 TE 298.0 K  
 D1 0.00000000 s  
 TD0 1

==== CHANNEL f1 =====  
 NUC1 1H  
 P1 12.50 u  
 PL1 -2.00 C  
 SFO1 499.4829469 N  
 F2 - Processing parameter  
 SI 32768  
 SF 499.4800000 N  
 WDW EM  
 SSB 0  
 LB 0.20 F  
 GB 0  
 PC 1.00



- 147.81
- 145.44
- 144.44
- 136.36
- 129.90
- 129.52
- 126.87
- 126.62
- 124.71
- 123.92
- 123.75
- 121.73
- 121.54
- 119.81
- 112.52

Compound 9

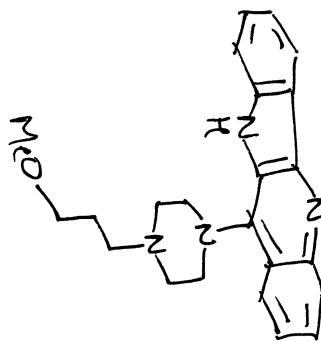

VB-GSA-0217

70.78

27.11

- 58.39
- 55.57
- 54.11
- 51.20

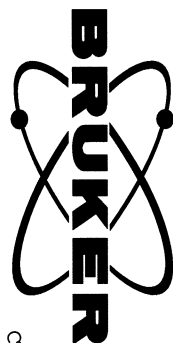

DRX-500

Current Data Parameters  
 NAME VB-GSA-0217  
 EXPNO 101  
 PROCNO 1

F2 - Acquisition Parameter  
 Date\_ 20091223  
 Time 14.16  
 INSTRUM spect  
 PROBHD 5 mm BBO BB-1H  
 PULPROG zgpg30  
 TD 65536  
 SOLVENT DMSO  
 NS 1520  
 DS 4  
 SWH 30030.029 Hz  
 FIDRES 0.458222 Hz  
 AQ 1.0912410 se  
 RG 2896.3  
 DW 16.650 us  
 DE 6.00 us  
 TE 298.3 K  
 D1 0.69999999 se  
 d11 0.03000000 se  
 DELTA 0.59999996 se  
 TD0 1

==== CHANNEL F1 =====  
 NUC1 13C  
 P1 5.00 us  
 PL1 0.00 dB  
 SFO1 125.6069050 MH

==== CHANNEL F2 =====  
 CPDPRG2 waltz16  
 NUC2 1H  
 PCPD2 80.00 us  
 PL2 -2.00 dB  
 PL12 18.00 dB  
 PL13 18.00 dB  
 SFO2 499.4819980 MH

F2 - Processing parameters  
 SI 32768  
 SF 125.5943460 MH  
 WDW EM  
 SSB 0  
 LB 1.00 Hz  
 GB 0  
 PC 1.40

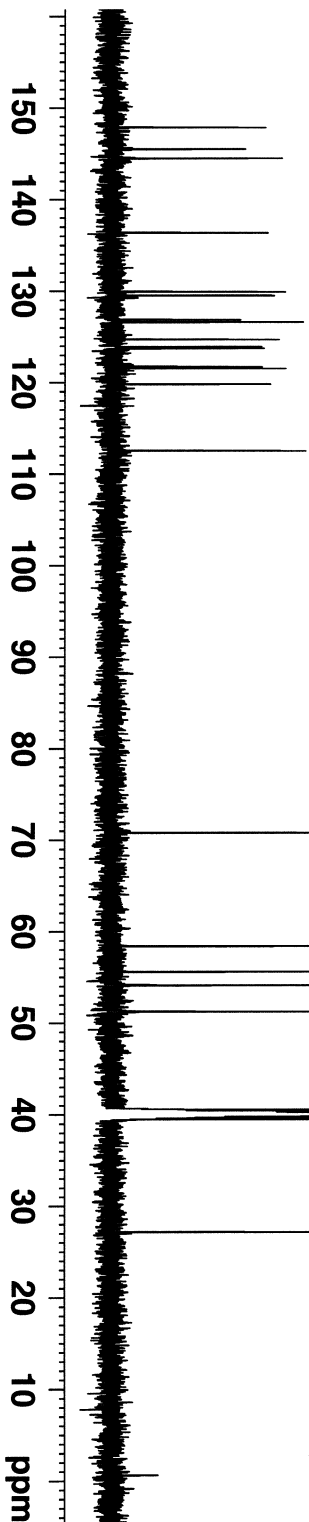

run w/acid

S74

=====  
 Injection Date : 12/17/2009 3:37:55 PM  
 Sample Name : VB-GSA-0217 Location : Vial 2  
 Acq. Operator : Karen Inj : 1  
 Acq. Instrument : Instrument 1 Inj Volume : 0.1 µl  
 Method : C:\HPCHEM\1\METHODS\LC\_MS.M  
 Last changed : 12/17/2009 3:36:54 PM by Karen  
 Zorbax SB ODS,35:65:0.25; MeOH/water/formicA, POS, 300-500; frag 70; 25C, cap volt 2500, gas temp 350; drying gas 10

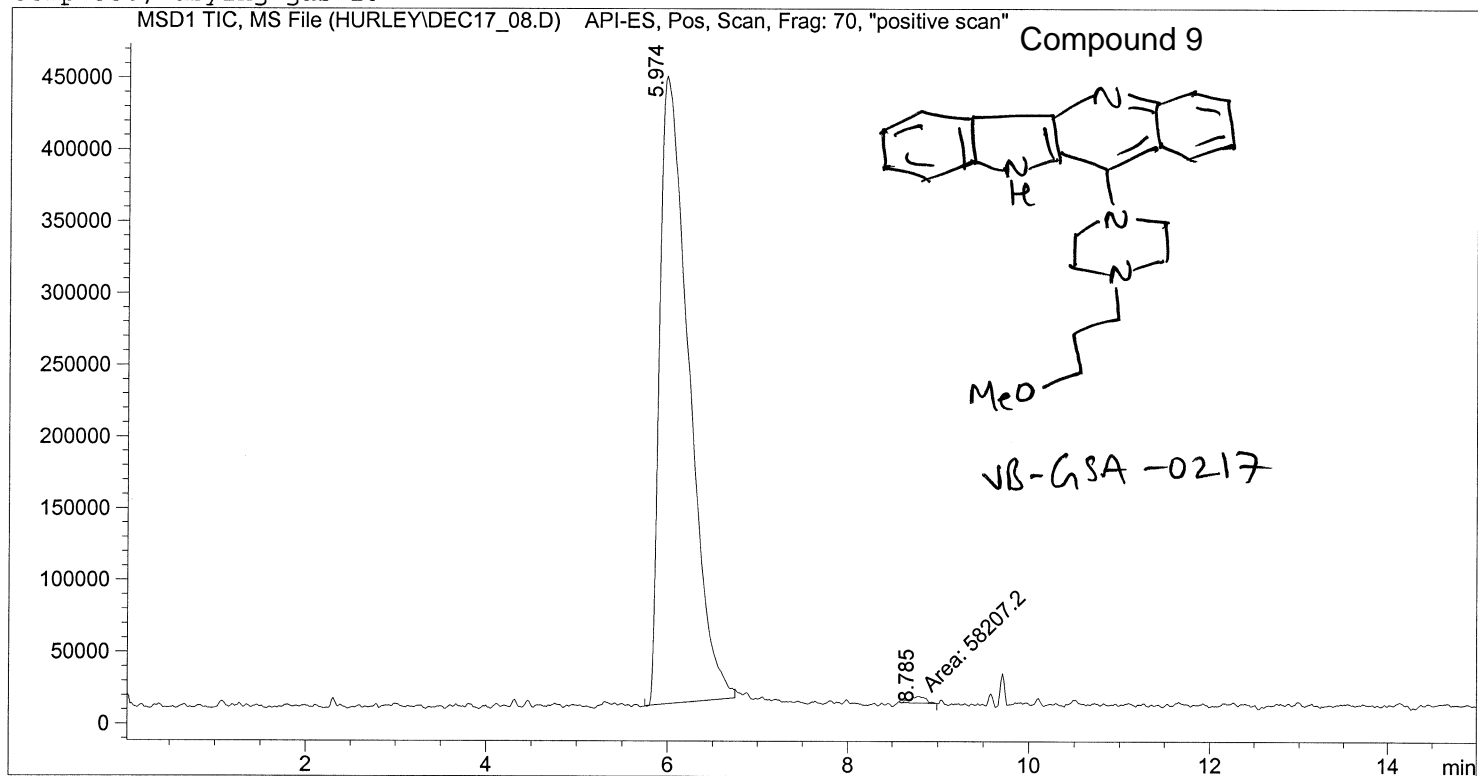

=====  
 Area Percent Report  
 =====

Sorted By : Signal  
 Multiplier : 1.0000  
 Dilution : 1.0000  
 Use Multiplier & Dilution Factor with ISTDs

Signal 1: MSD1 TIC, MS File

| Peak # | RetTime [min] | Type | Width [min] | Area      | Height     | Area %  |
|--------|---------------|------|-------------|-----------|------------|---------|
| 1      | 5.974         | PB   | 0.3145      | 9.65067e6 | 4.37089e5  | 99.4005 |
| 2      | 8.785         | MM   | 0.2062      | 5.82072e4 | 4705.27588 | 0.5995  |

Totals : 9.70888e6 4.41795e5

=====  
 \*\*\* End of Report \*\*\*

=====  
Injection Date : 12/17/2009 3:37:55 PM  
Sample Name : VB-GSA-0217 Location : Vial 2  
Acq. Operator : Karen Inj : 1  
Acq. Instrument : Instrument 1 Inj Volume : 0.1 µl  
Method : C:\HPCHEM\1\METHODS\LC\_MS.M  
Last changed : 12/17/2009 3:36:54 PM by Karen  
Zorbax SB ODS, 35:65:0.25; MeOH/water/formicA, POS, 300-500; frag 70; 25C, cap volt 2500, gas  
temp 350; drying gas 10

Current Chromatogram(s)

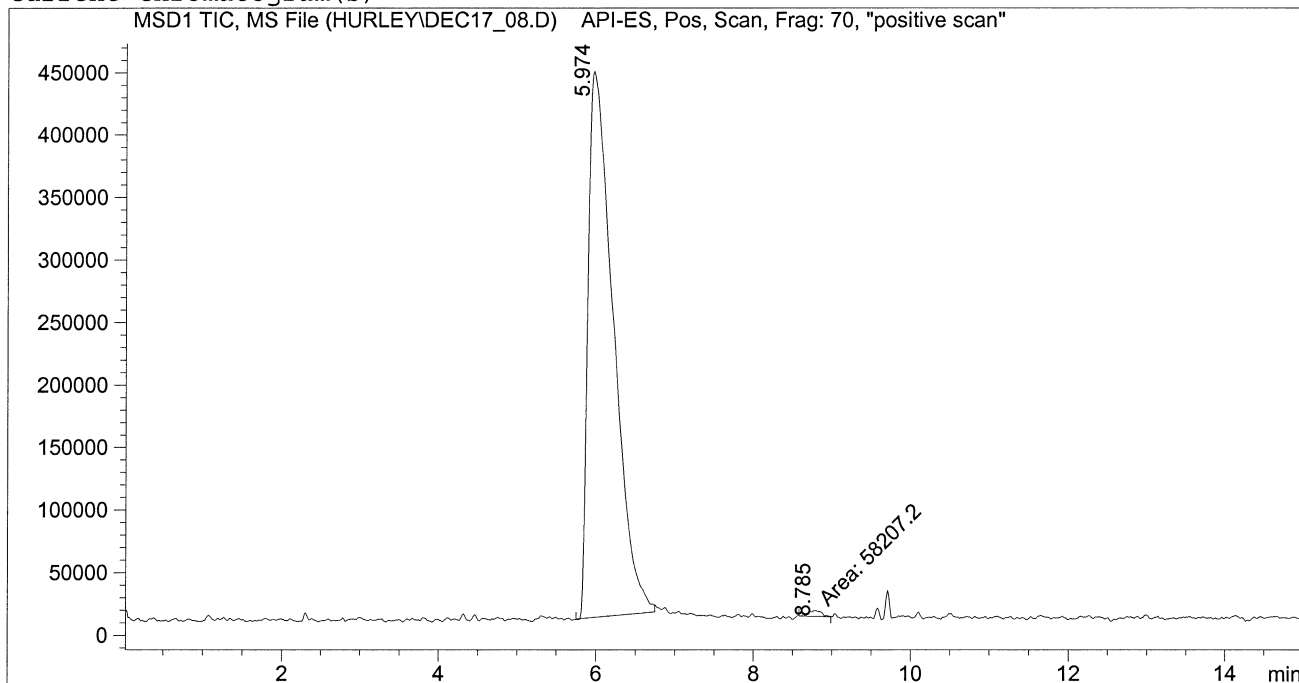

Apex Mass Spectrum of Peak 5.974 of DEC17\_08.D

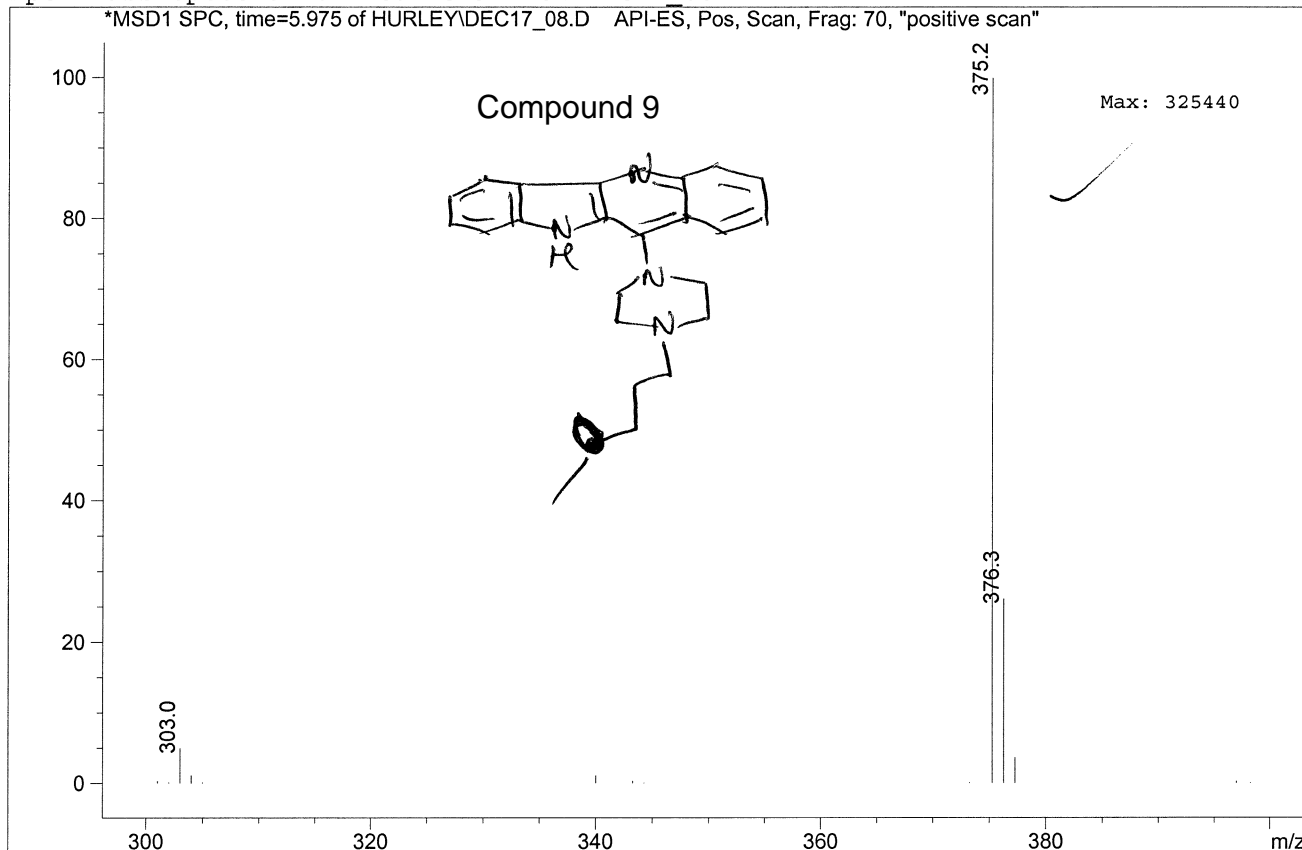

VB-GSA-0217 #60-63 RT: 1.60-1.68 AV: 4 NL: 7.24E6  
T: + p Full ms [100.00-1500.00]  
188.1  
[M+H]<sup>+</sup>

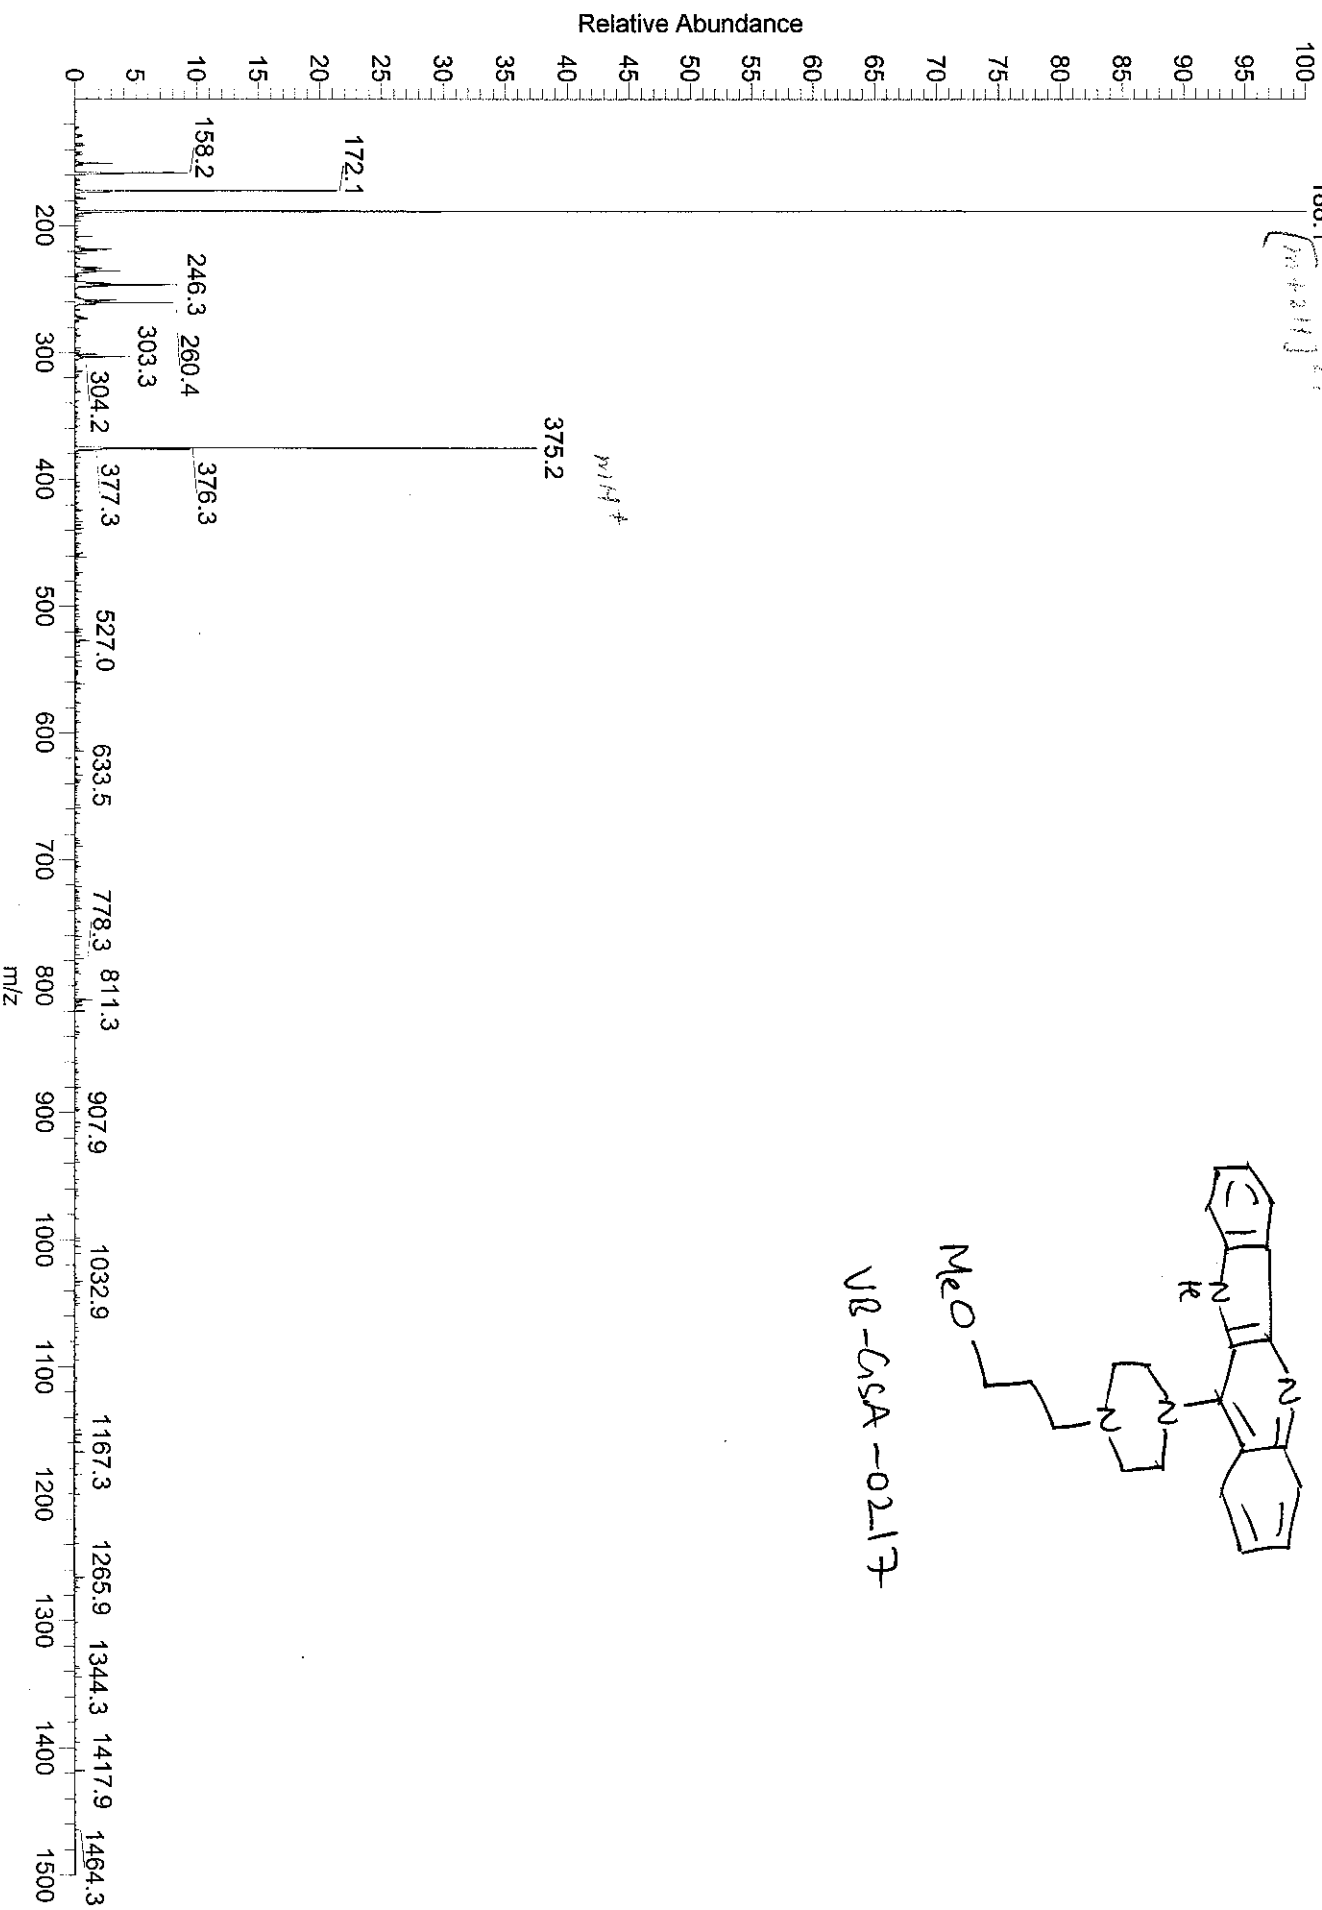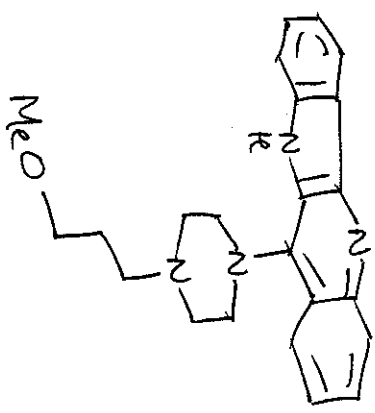

VB-GSA-0217

S77  
VB-GSA-0217 #60-63 RT: 1.60-1.68 AV: 4 NL: 7.24E6  
T: + p Full ms [100.00-1500.00]

Compound 9

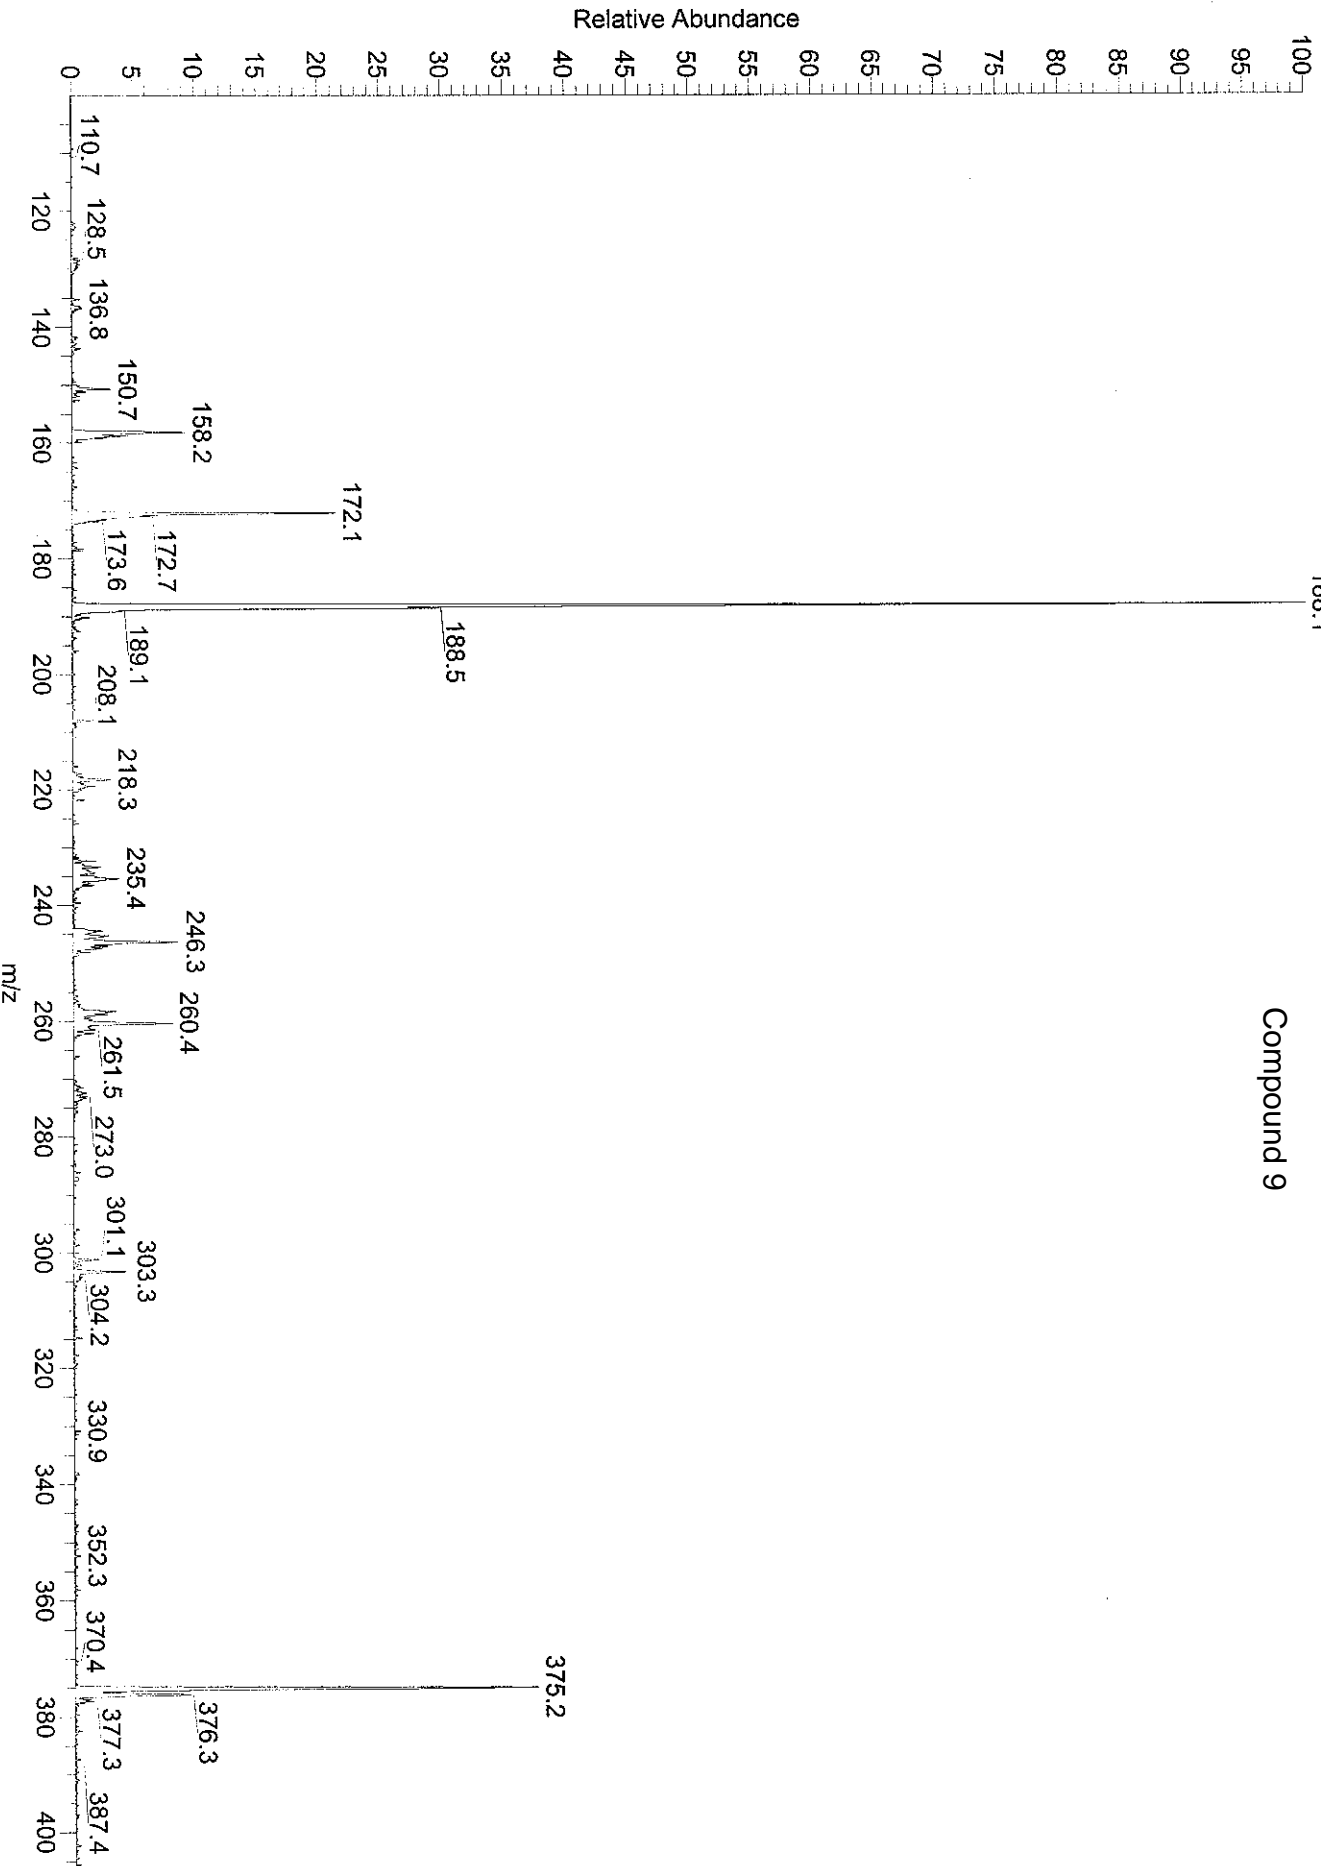

VB-GSA-0217 #10-12 RT: 0.27-0.33 AV: 3 NL: 5.30E5  
T: + p Full ms2 375.00@30.00 [100.00-1500.00]

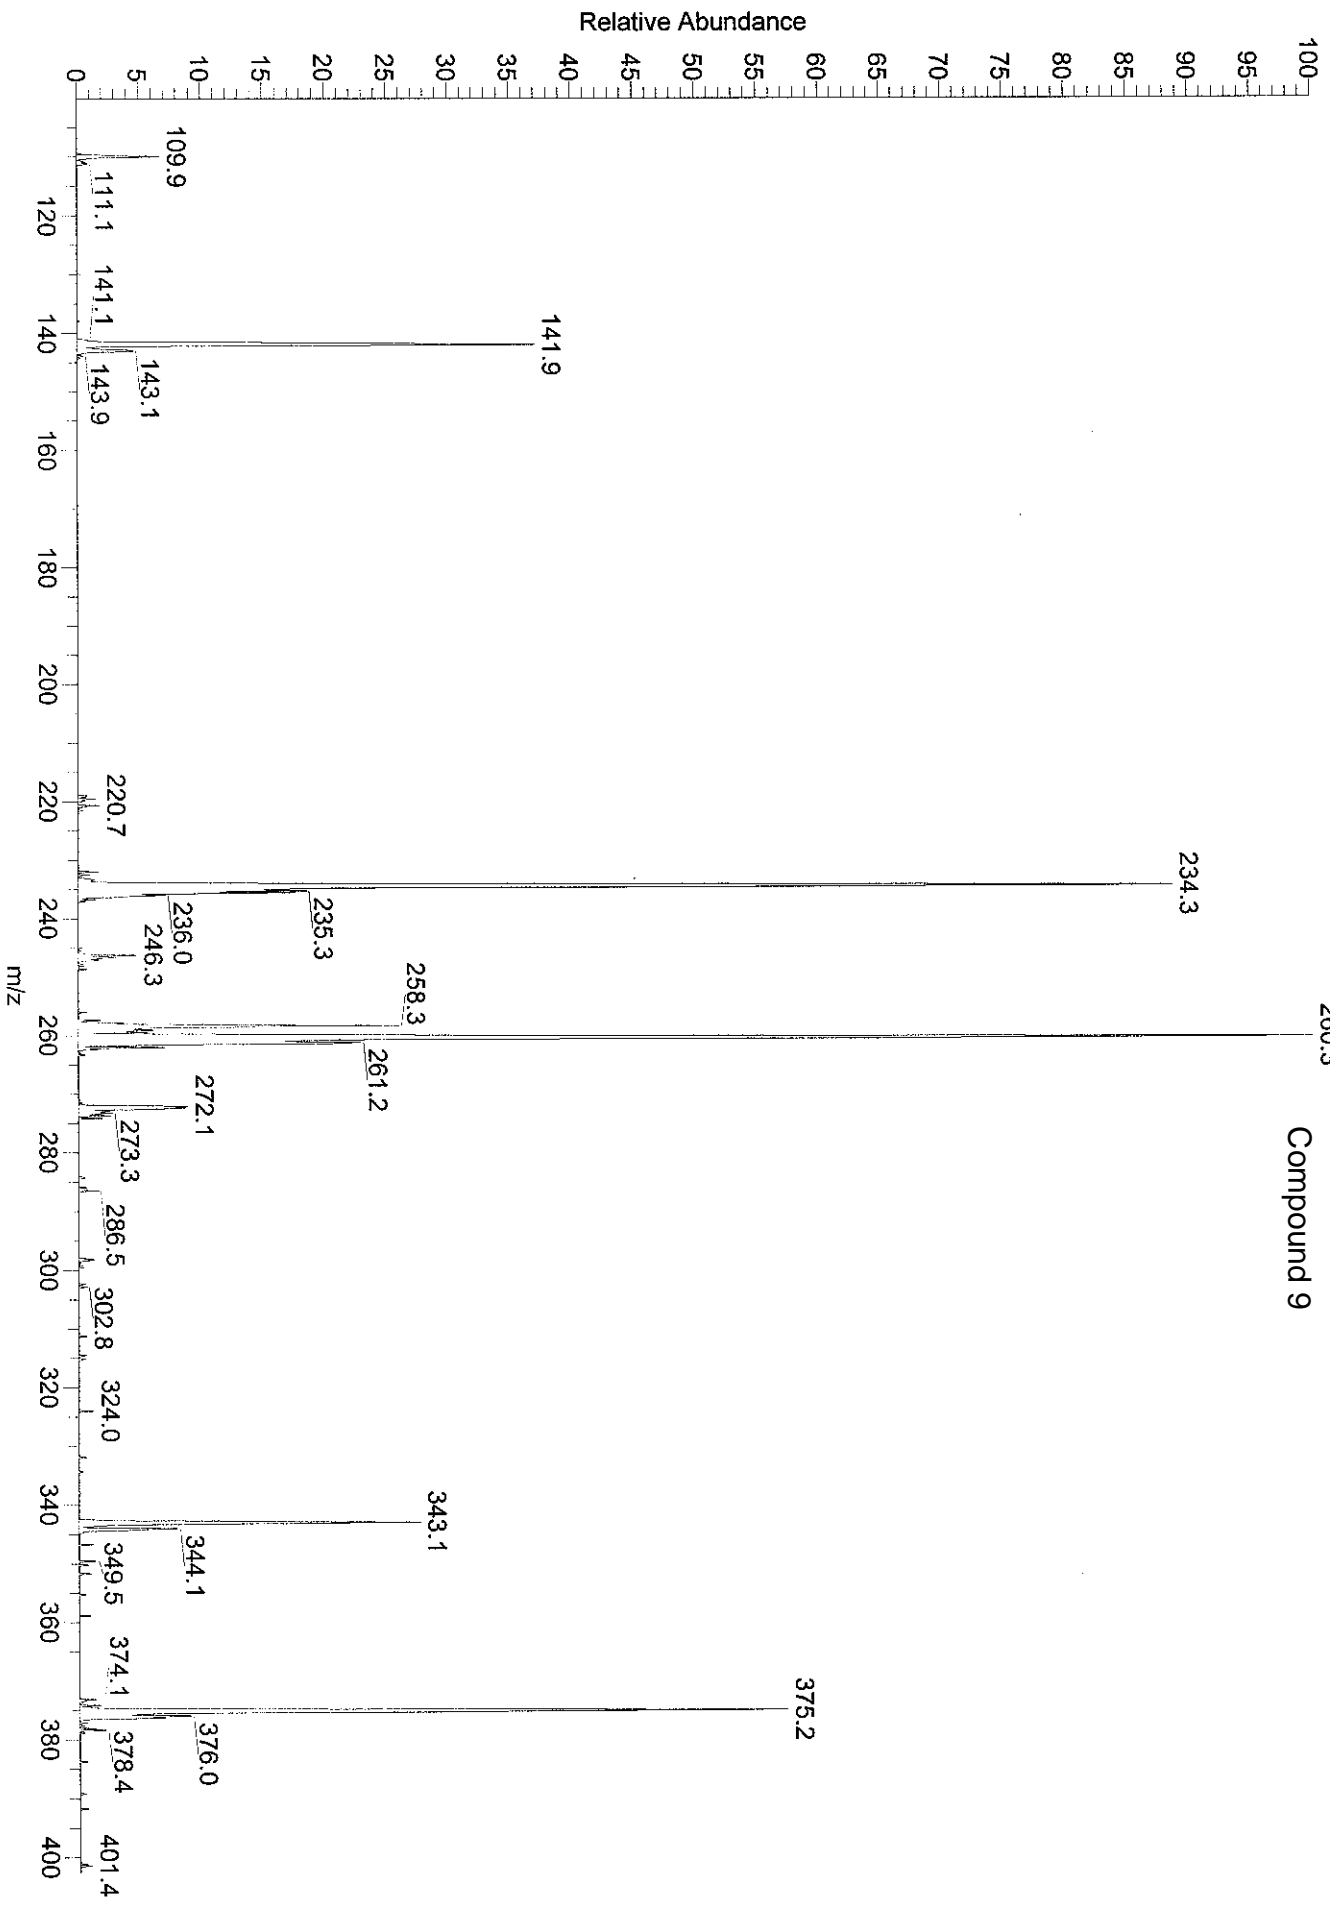

# Generic Display Report

**Analysis Info**  
Analysis Name D:\DATA\Facility\_Dec\_09\VB-GSA-0217\_rep\_000002.d  
Method ESI\_101506  
Sample Name VB-GSA-0217  
Comment Venkat B., ACN:H2O 1:1.0.1%FA

Acquisition Date 12/22/2009 10:29:39 AM  
Operator  
Instrument apex-Qe

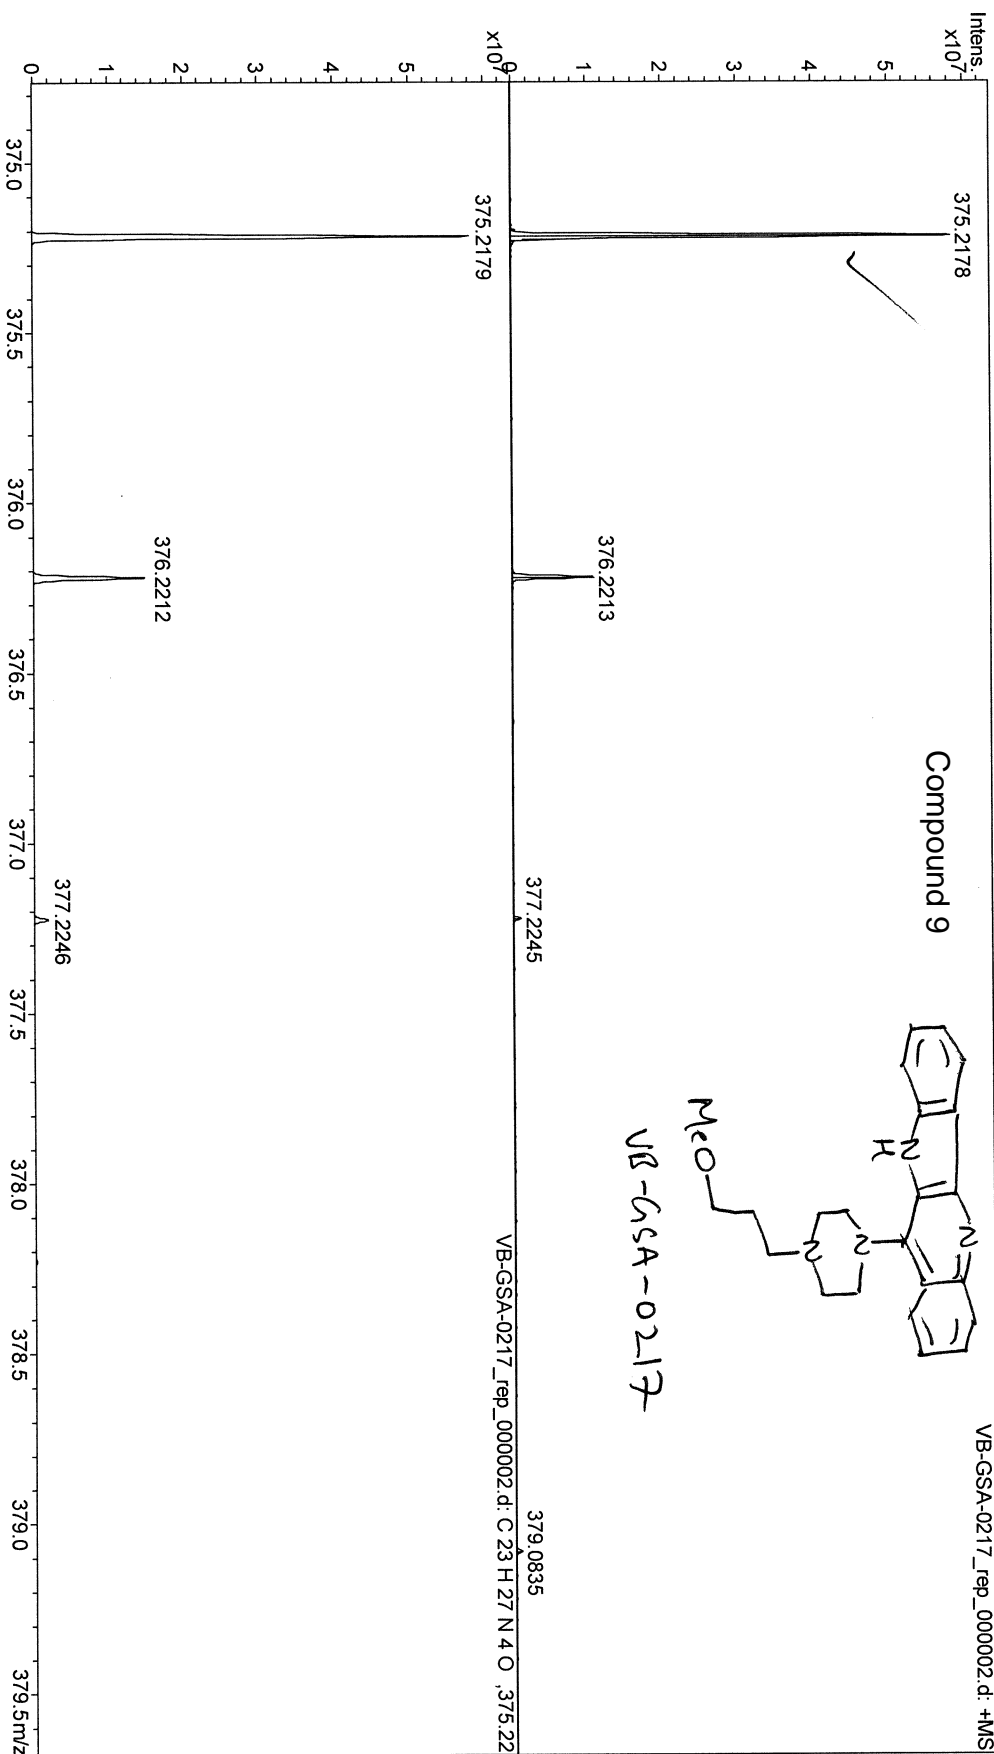

## SmartFormula Manually

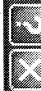

Min

C<sub>11</sub>

Generate

Max

C<sub>11</sub>-n

Help

Note: for m &lt; 2000 the elements C, H, N, and O are considered implicitly.

Measured m/z

375.2178

Tolerance

2

mDa

Charge

1

| # | Mol. Formula                                     | m/z      | err [mDa] | lerr [ppm] | err [ppm] | mean err [ppm] | mSigma | Sigma Rank | rdb  | N rule | e <sup>-</sup> |
|---|--------------------------------------------------|----------|-----------|------------|-----------|----------------|--------|------------|------|--------|----------------|
| 1 | C <sub>22</sub> H <sub>31</sub> O <sub>5</sub>   | 375.2166 | -1.22     | 3.3        | -3.3      | -3.3           | 32.6   | 1          | 7.5  | ok     | even           |
| 2 | C <sub>23</sub> H <sub>27</sub> N <sub>4</sub> O | 375.2179 | 0.12      | 0.3        | 0.3       | 0.2            | 44.2   | 2          | 12.5 | ok     | even           |

Compound 9

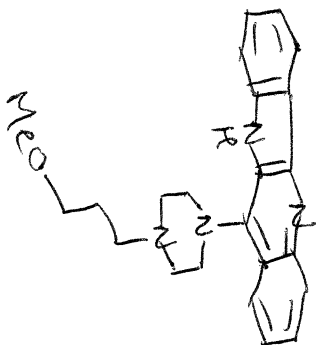 Automatically locate monoisotopic peak

Maximum number of formulas

500

 Check rings plus double bonds

Minimum

-0.5

Maximum

40

Electron configuration

even

 Filter H/C element ratio

Minimum H/C

0

Maximum H/C

3

 Estimate carbon number Generate immediately

Show Pattern



Compound 10

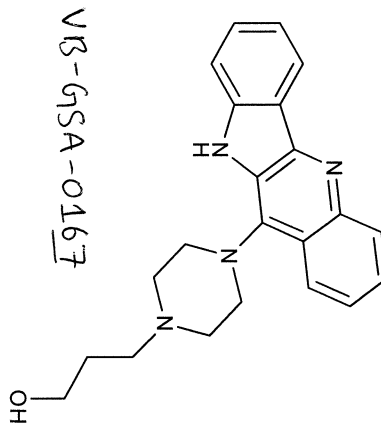

- 10.884
- 8.342
- 8.310
- 8.279
- 8.152
- 8.125
- 7.612
- 7.590
- 7.565
- 7.541
- 7.518
- 7.272
- 7.251
- 7.229
- 5.761
- 4.704
- 4.689
- 3.716
- 3.699
- 3.551
- 3.531
- 3.510
- 3.350
- 3.175
- 2.954
- 2.746
- 2.534
- 2.503
- 2.411
- 1.909
- 1.722
- 1.700
- 1.677
- 1.218

Final ✓

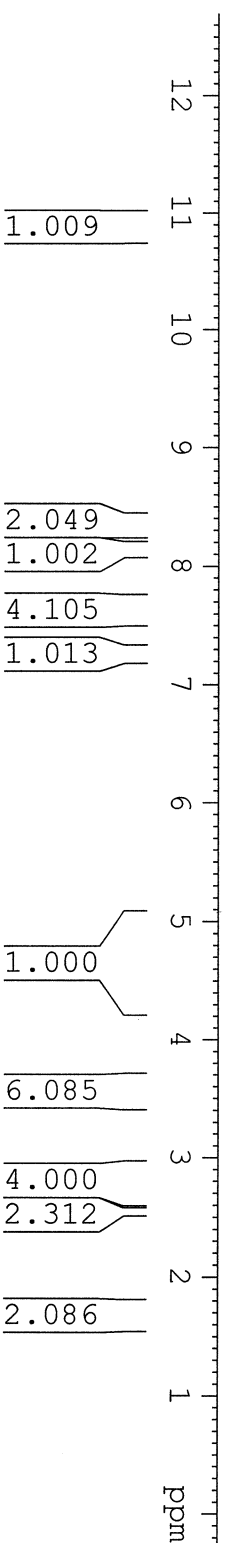

Current Data Parameters  
 NAME VB-GSA-0167  
 EXPNO 3  
 PROCNO 1

F2 - Acquisition Parameters  
 Date\_ 20080722  
 Time 11.46  
 INSTRUM spect  
 PROBHD 5 mm QNP 1H/1  
 PULPROG zg30  
 TD 2930  
 FIDRES 0.094190 Hz  
 AQ 5.3084660 sec  
 RG 512  
 DW 81.000 usec  
 DE 6.00 usec  
 TE 300.0 K  
 D1 1.00000000 sec

==== CHANNEL f1 =====  
 NUC1 1H  
 P1 9.25 usec  
 PL1 0.00 dB  
 SFO1 300.1318534 MHz

F2 - Processing parameters  
 SI 32768  
 SF 300.1300000 MHz  
 WDW EM  
 SSB 0  
 LB 0.30 Hz  
 GB 0  
 PC 1.00

Compound 10

VB-GSA-0167

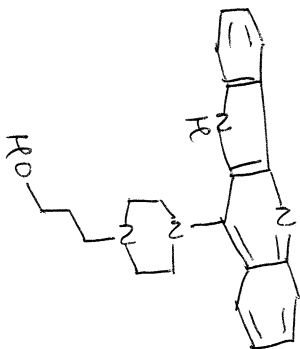

- 148.173
- 145.807
- 144.812
- 136.736
- 130.306
- 129.896
- 127.233
- 127.020
- 125.108
- 124.277
- 124.142
- 122.091
- 121.945
- 120.204
- 112.898

- 60.295
- 56.255
- 55.787\*
- 54.538
- 51.556
- 41.183
- 40.905
- 40.627
- 40.349
- 40.071
- 39.792
- 39.514
- 30.541

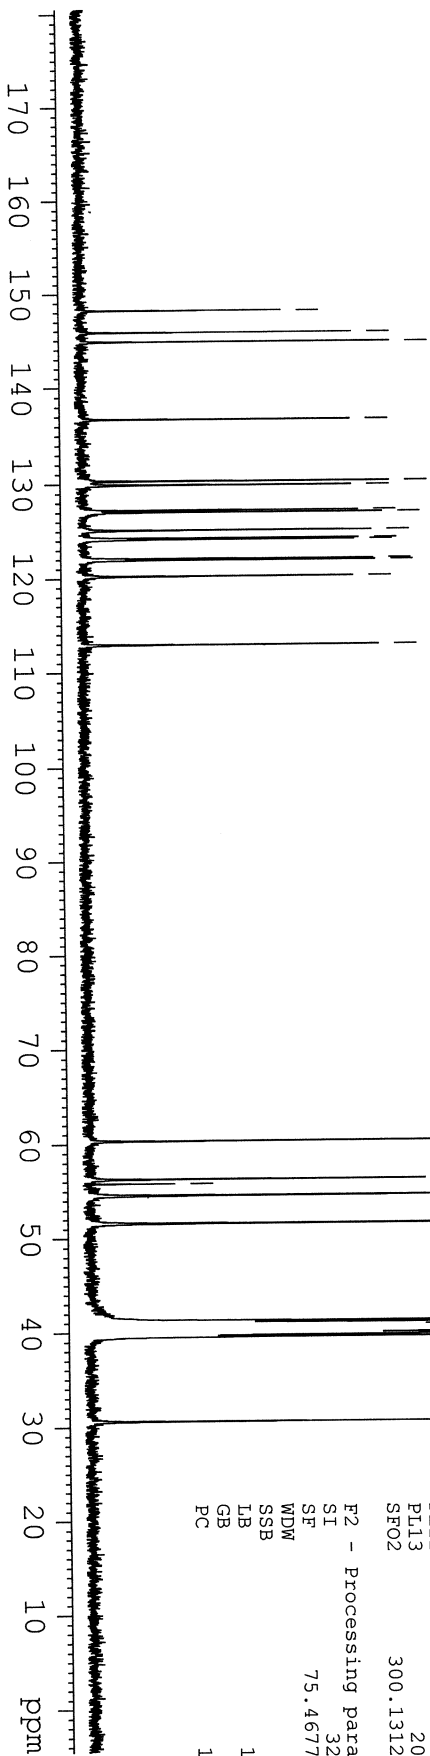

Current Data Parameters  
 NAME VB-GSA-0167-13C-Final  
 EXPNO 2  
 PROCNO 1

F2 - Acquisition Parameters  
 Date\_ 20080728  
 Time 8.04

INSTRUM spect  
 PROBHD 5 mm QNP 1H/1  
 PULPROG zgpg30  
 TD 65536  
 SOLVENT DMSO  
 NS 16000  
 DS 4

SWH 17985.611 Hz  
 FIDRES 0.274439 Hz  
 AO 1.8219508 sec  
 RG 724.1  
 DW 27.800 usec  
 DE 6.00 usec  
 TE 300.0 K  
 D1 2.00000000 sec  
 d11 0.03000000 sec  
 d12 0.00002000 sec

CHANNEL f1 =====  
 NUC1 13C

P1 6.00 usec  
 PL1 2.00 dB  
 SFO1 75.4752653 MHz

CHANNEL f2 =====  
 CPDPRG2 waltz16

NUC2 1H  
 PCPD2 90.00 usec  
 PL2 0.00 dB  
 PL12 20.00 dB  
 PL13 20.00 dB  
 SFO2 300.1312005 MHz

F2 - Processing parameters  
 SI 32768  
 SF 75.4677190 MHz  
 WDW EM  
 SSB 0  
 LB 1.00 Hz  
 GB 0  
 PC 1.00

5

=====  
Injection Date : 8/6/08 4:43:49 PM  
Sample Name : VB-GSA-0167 Vial : 11  
Acq. Operator : Karen Inj : 1  
Inj Volume : 0.1 µl

Method : D:\HPCHEM\1\METHODS\SCOTT\_C.M  
Last changed : 8/6/08 4:25:49 PM by Karen  
(modified after loading)

Zorbax C18 SB column, 3.5µ, 4.6 x 150mm, mp=30/70/0.25, MeOH:HOH:HAc; scan 100-500; flow 0.5mL/min; vcap 2500, frag 100; col temp 45

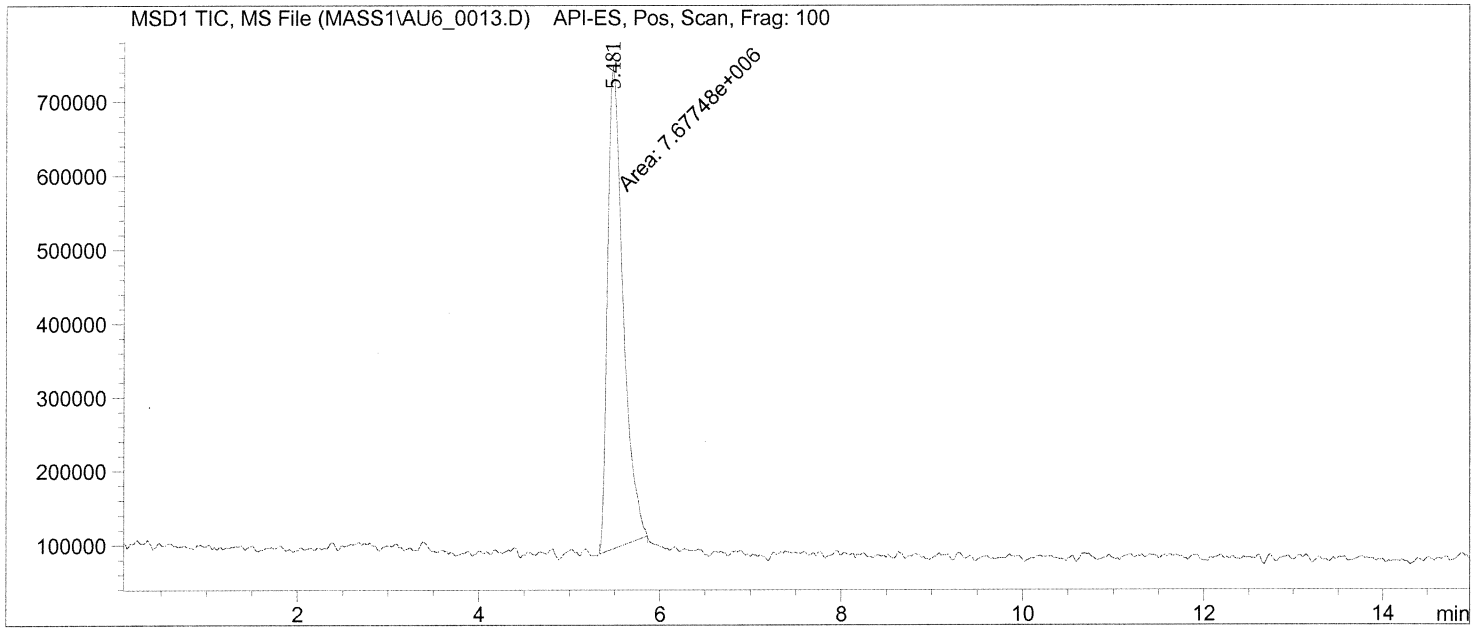

=====  
Area Percent Report  
=====

Sorted By : Retention Time  
Multiplier : 1.0000  
Dilution : 1.0000

Signal 1: MSD1 TIC, MS File

| Peak # | RetTime [min] | Sig | Type | Area      | Height    | Area %     |
|--------|---------------|-----|------|-----------|-----------|------------|
| 1      | 5.481         | 1   | MM   | 7.67748e6 | 6.57356e5 | 100.0000 ✓ |

Totals : 7.67748e6 6.57356e5

Compound 10

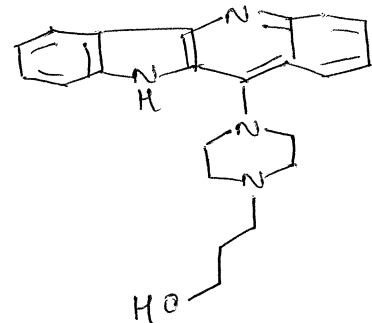

=====  
\*\*\* End of Report \*\*\*

=====  
Injection Date : 8/6/08 4:43:49 PM  
Sample Name : VB-GSA-0167  
Acq. Operator : Karen  
Vial : 11  
Inj : 1  
Inj Volume : 0.1  $\mu$ l  
Method : D:\HPCHEM\1\METHODS\SCOTT\_C.M  
Last changed : 8/6/08 4:25:49 PM by Karen  
(modified after loading)  
Zorbax C18 SB column, 3.5 $\mu$ , 4.6 x 150mm, mp=30/70/0.25, MeOH:HOH:HAc; scan 100-500; flow  
0.5mL/min; vcap 2500, frag 100; col temp 45

Current Chromatogram(s)

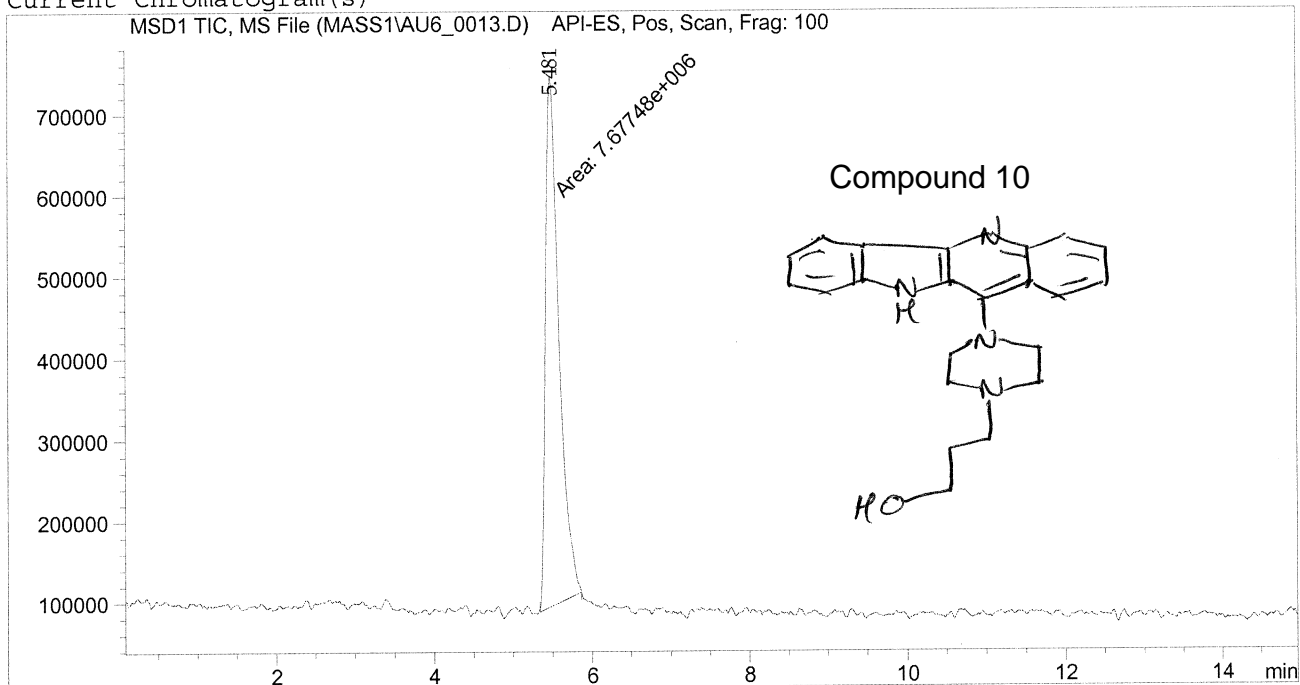

Apex Mass Spectrum of Peak 5.481 of AU6\_0013.D

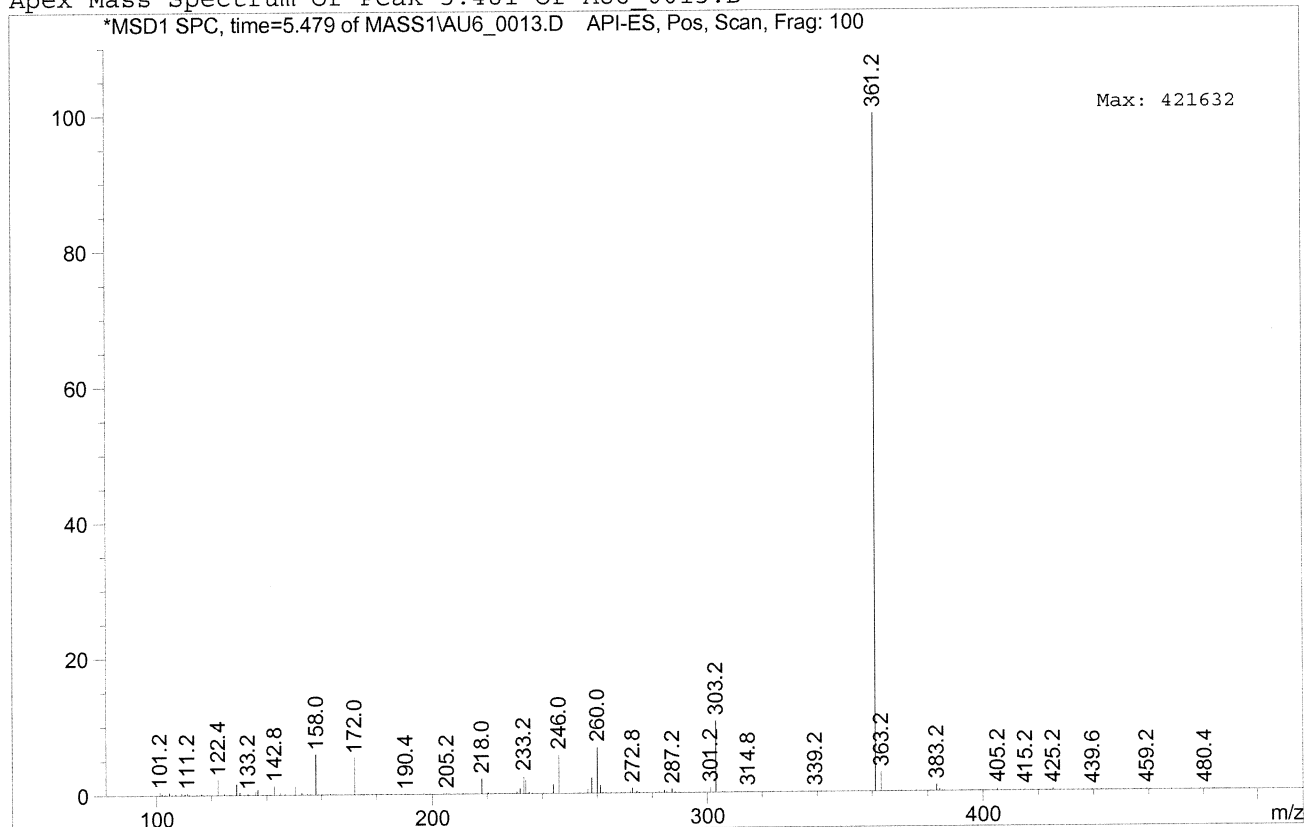

VB-0167 #28-32 RT: 0.94-1.08 AV: 5 NL: 5.66E5  
S T: + p Full ms [150.00-2000.00]  
S 361.3 MH<sup>+</sup>

Compound 10

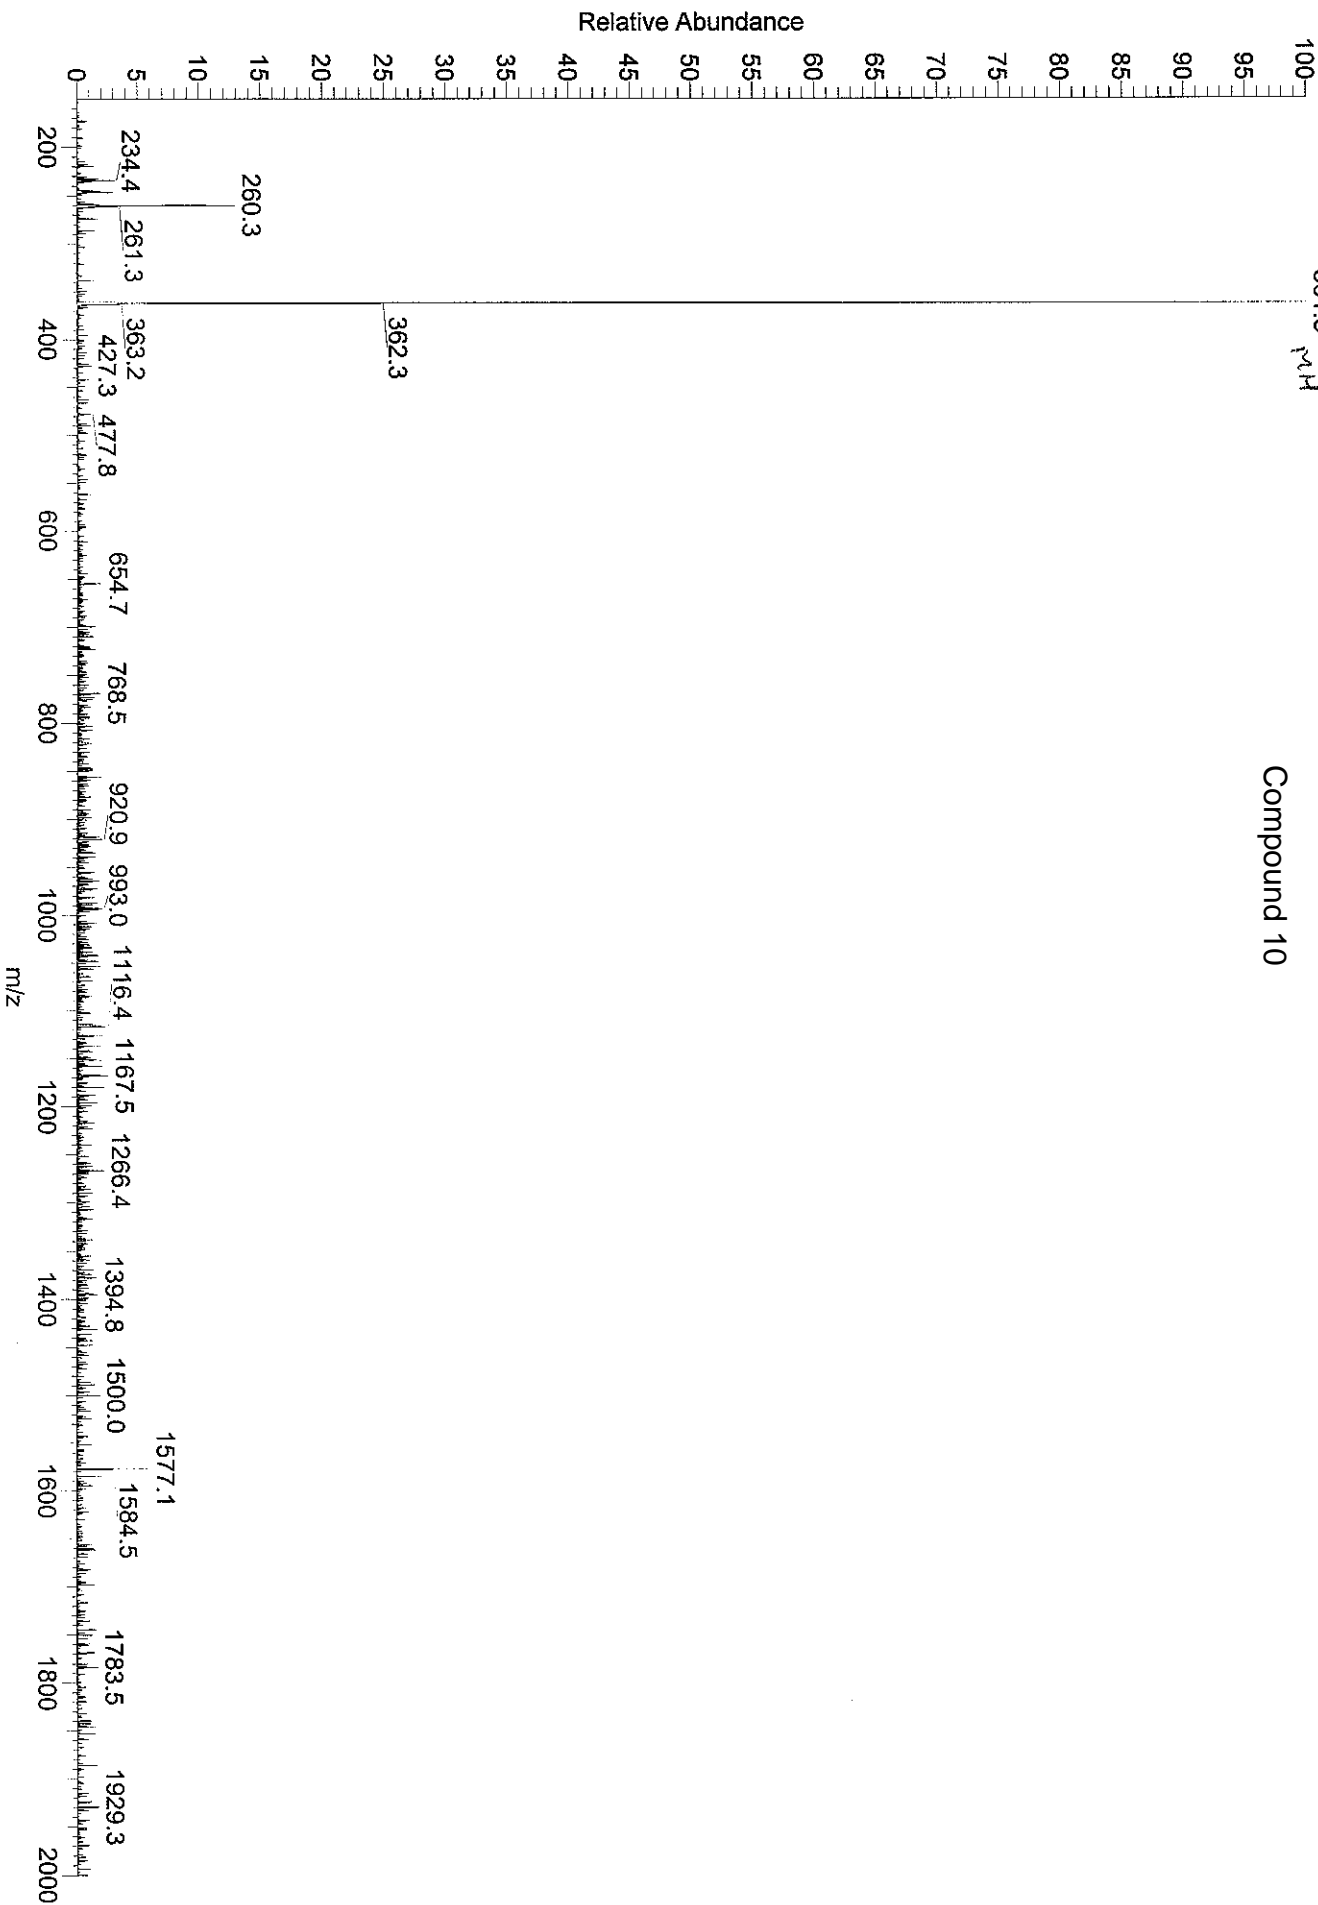

VB-0167 #28-32 RT: 0.94-1.08 AV: 5 NL: 5.66E5  
%T: + p Full ms [150.00-2000.00]

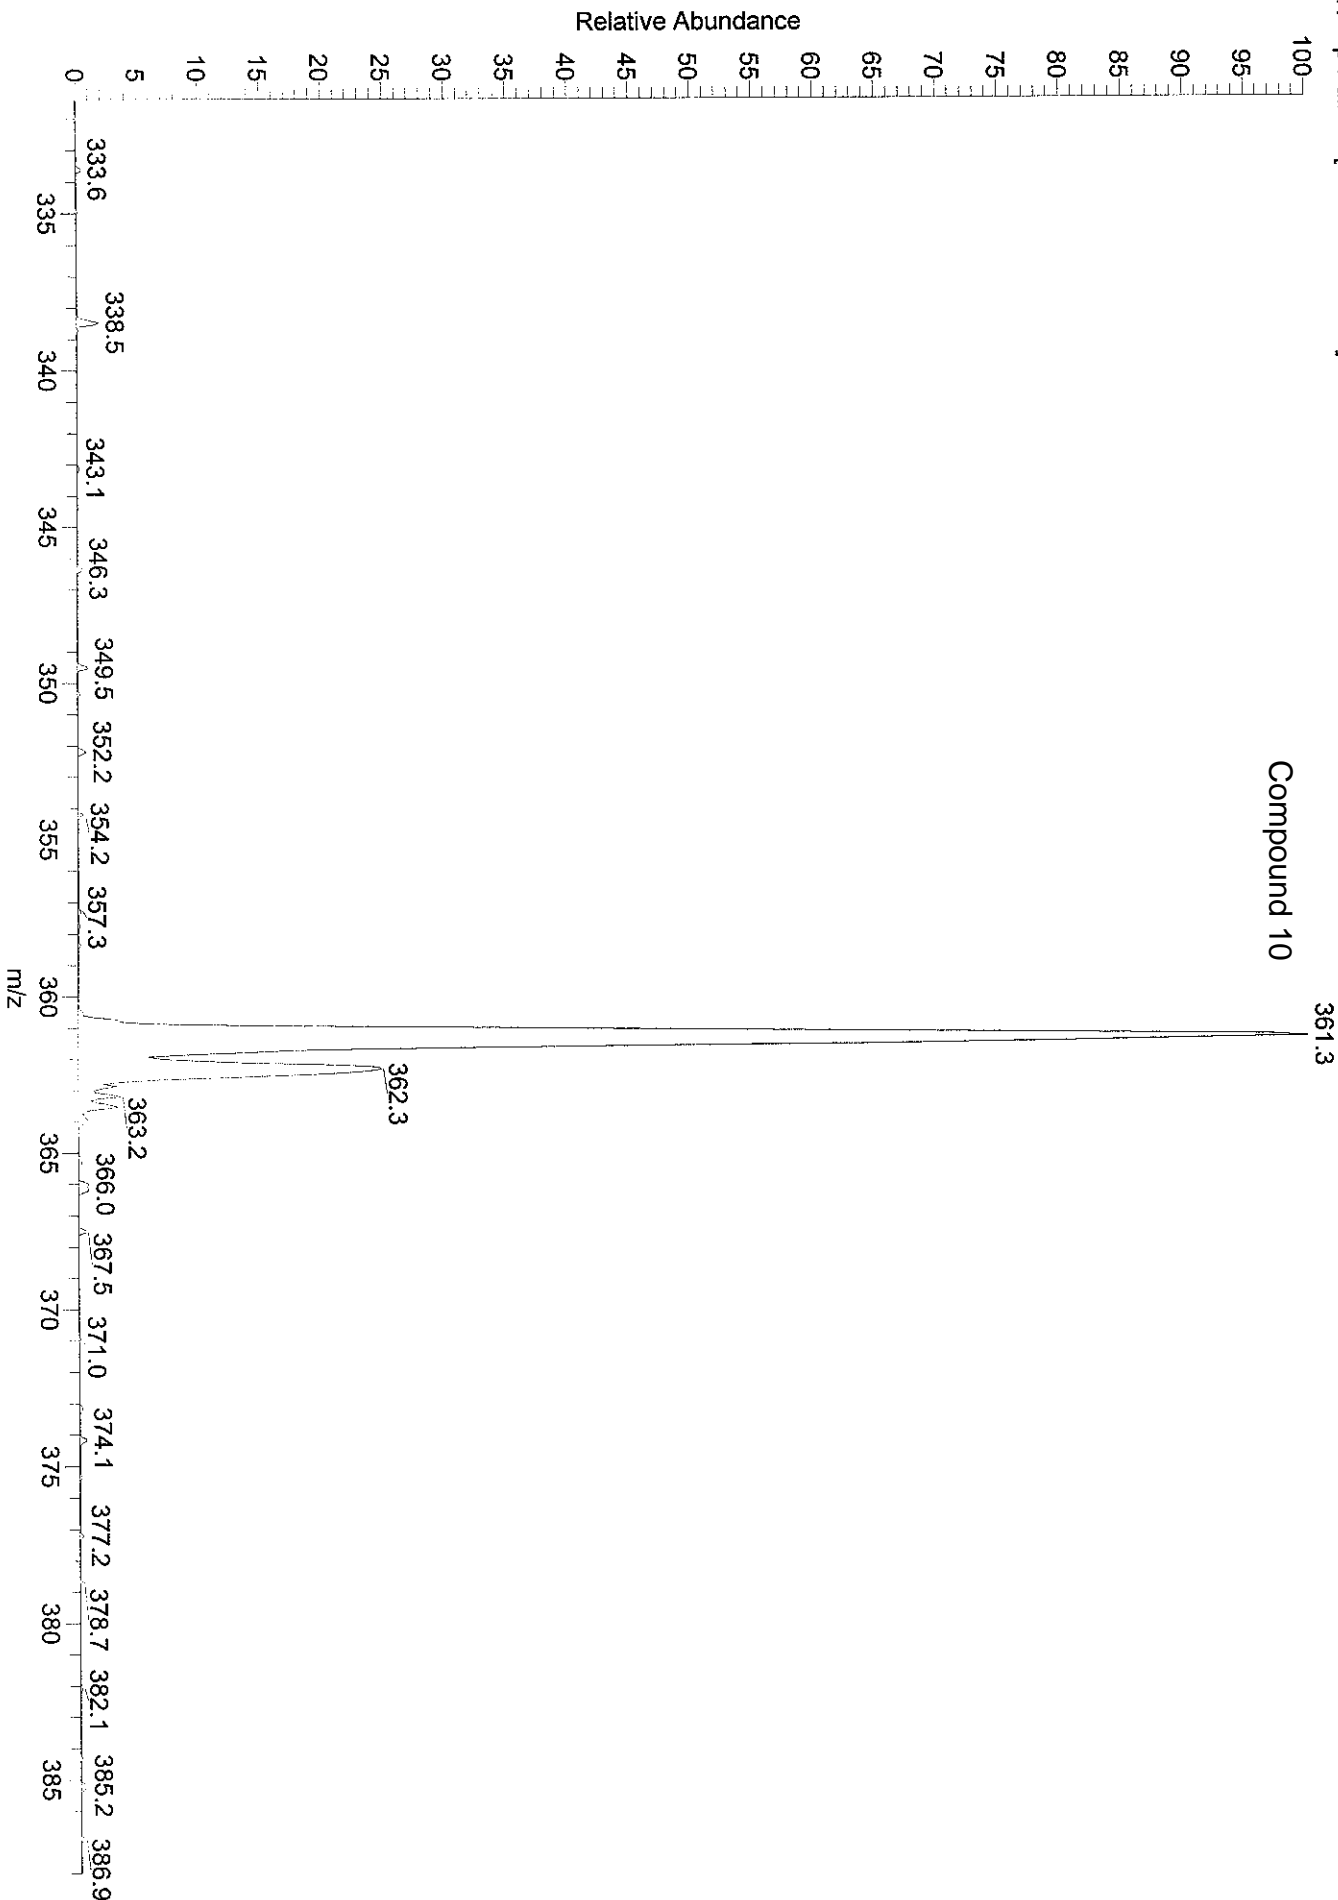

VB-0167 #17-18 RT: 0.56-0.60 AV: 2 NL: 8.97E5  
S T: + p Full ms2 361.30@30.00 [150.00-2000.00]

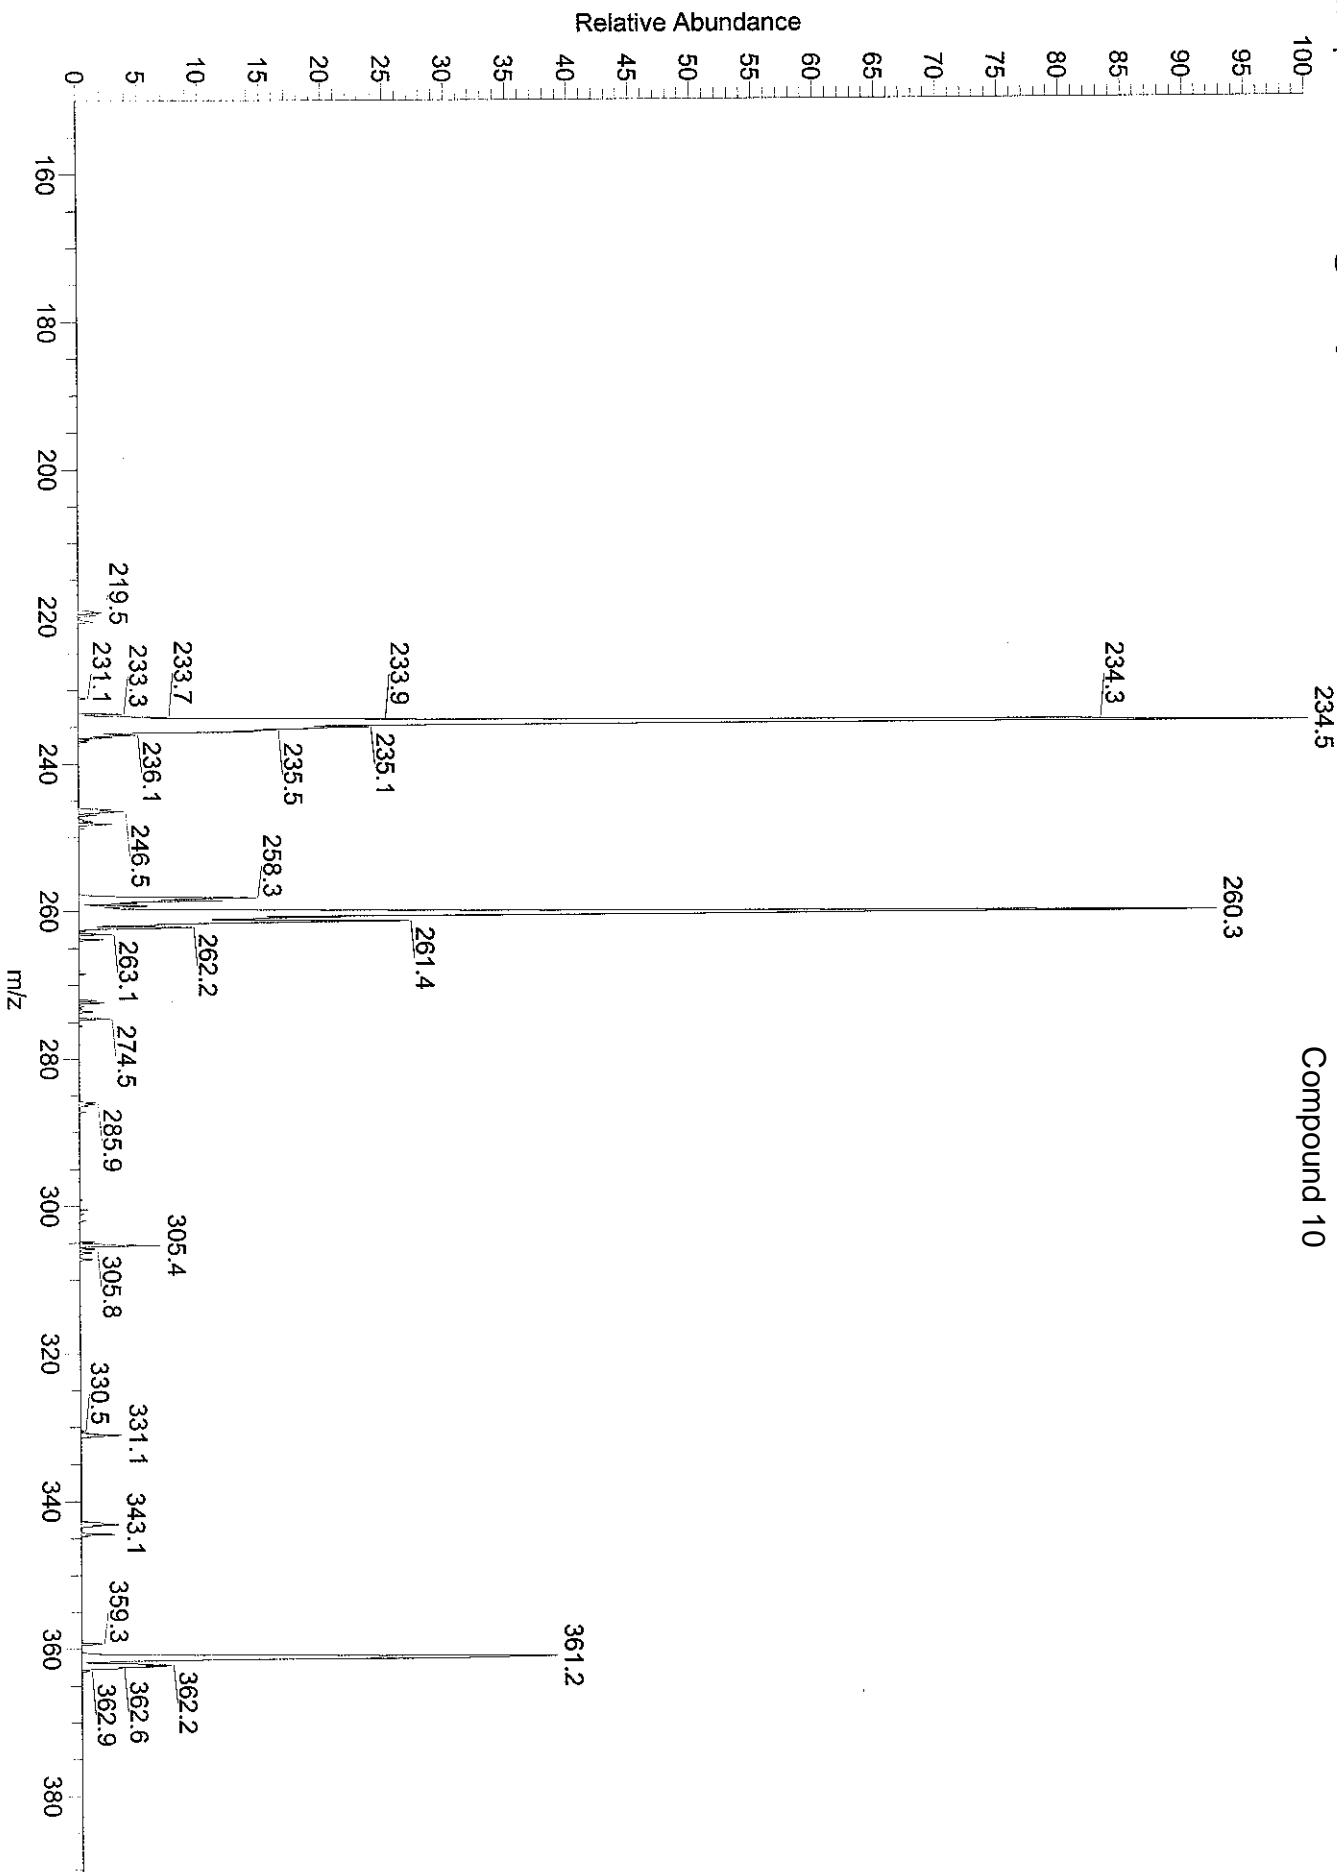

# Generic Display Report

**Analysis Info**  
Analysis Name: D:\DATA\Facility\_July\_08\VB-0167\_000002.d  
Method: ESI\_101506  
Sample Name: VB-0167  
Comment: Venkat B., MeOH:ACN

Acquisition Date: 7/28/2008 10:56:53 AM  
Operator: Administrator  
Instrument: apex-Qe

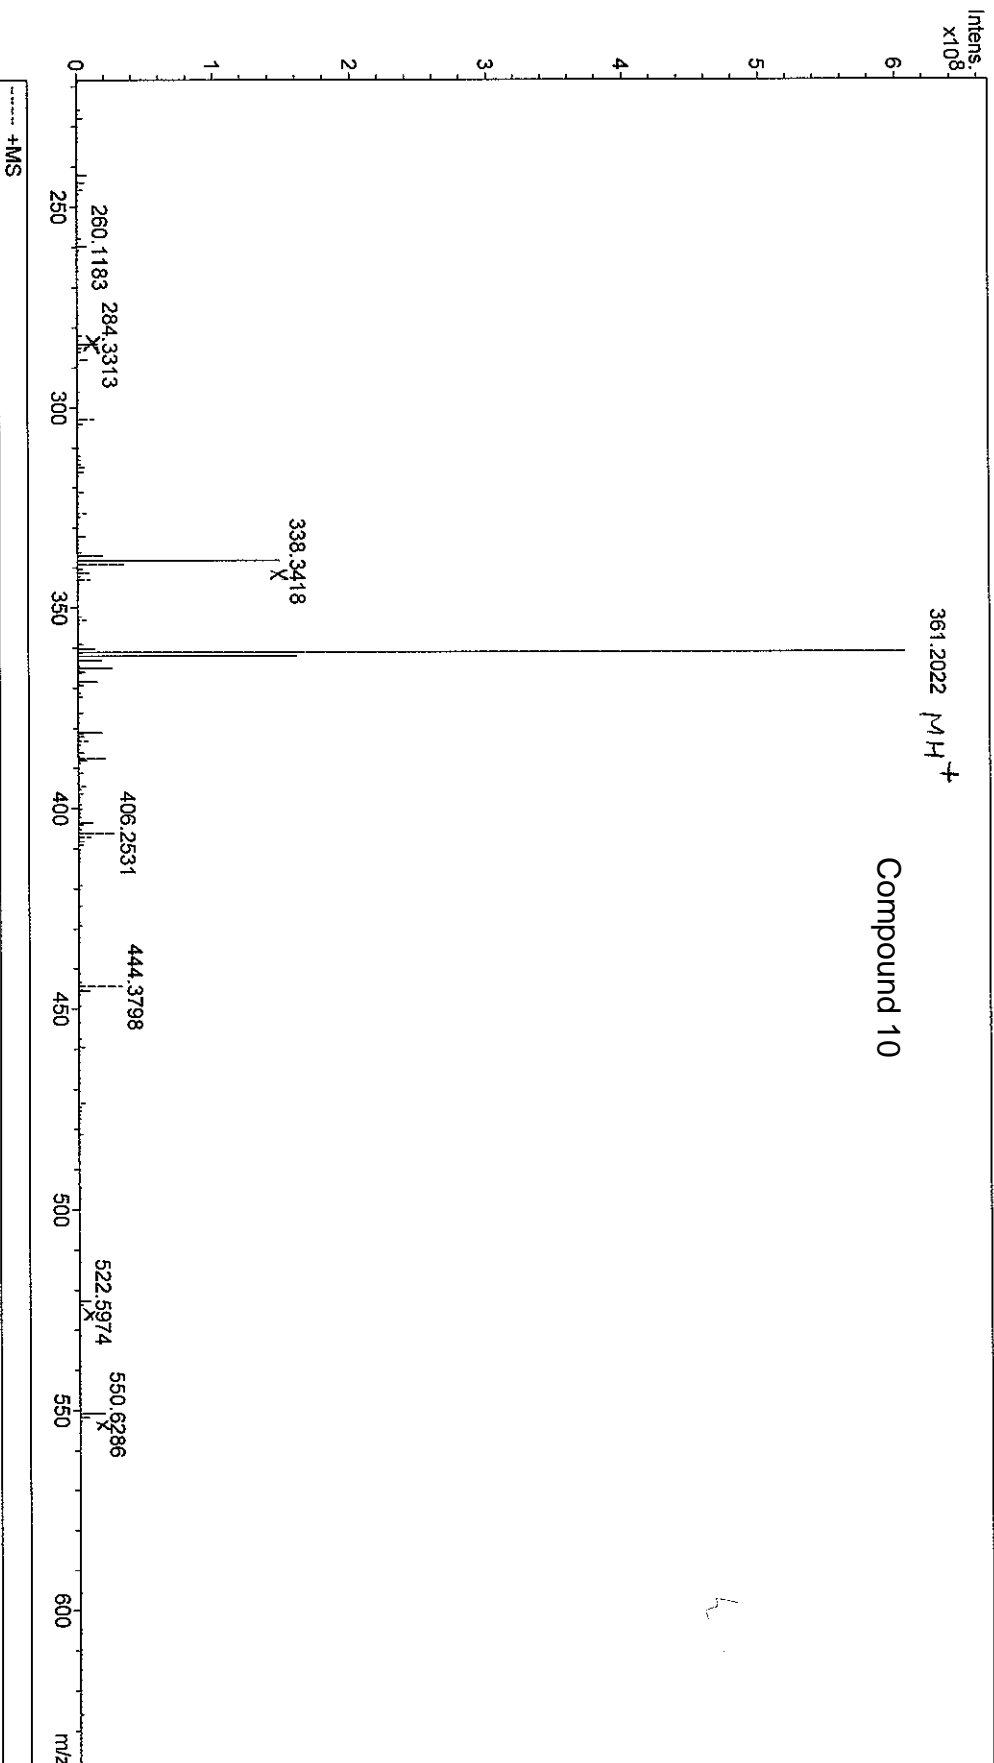

X in background



# Generic Display Report

## Analysis Info

Analysis Name D:\DATA\Facility\_July\_08\VB-0167\_000002.d  
Method ESL\_101506  
Sample Name VB-0167  
Comment Venkat B., MeOH:ACN

Acquisition Date 7/28/2008 10:56:53 AM

Operator Administrator  
Instrument apex-Qe

Intens. x10<sup>5</sup> 361.2022 Compound 10 VB-0167\_000002.d: +MS

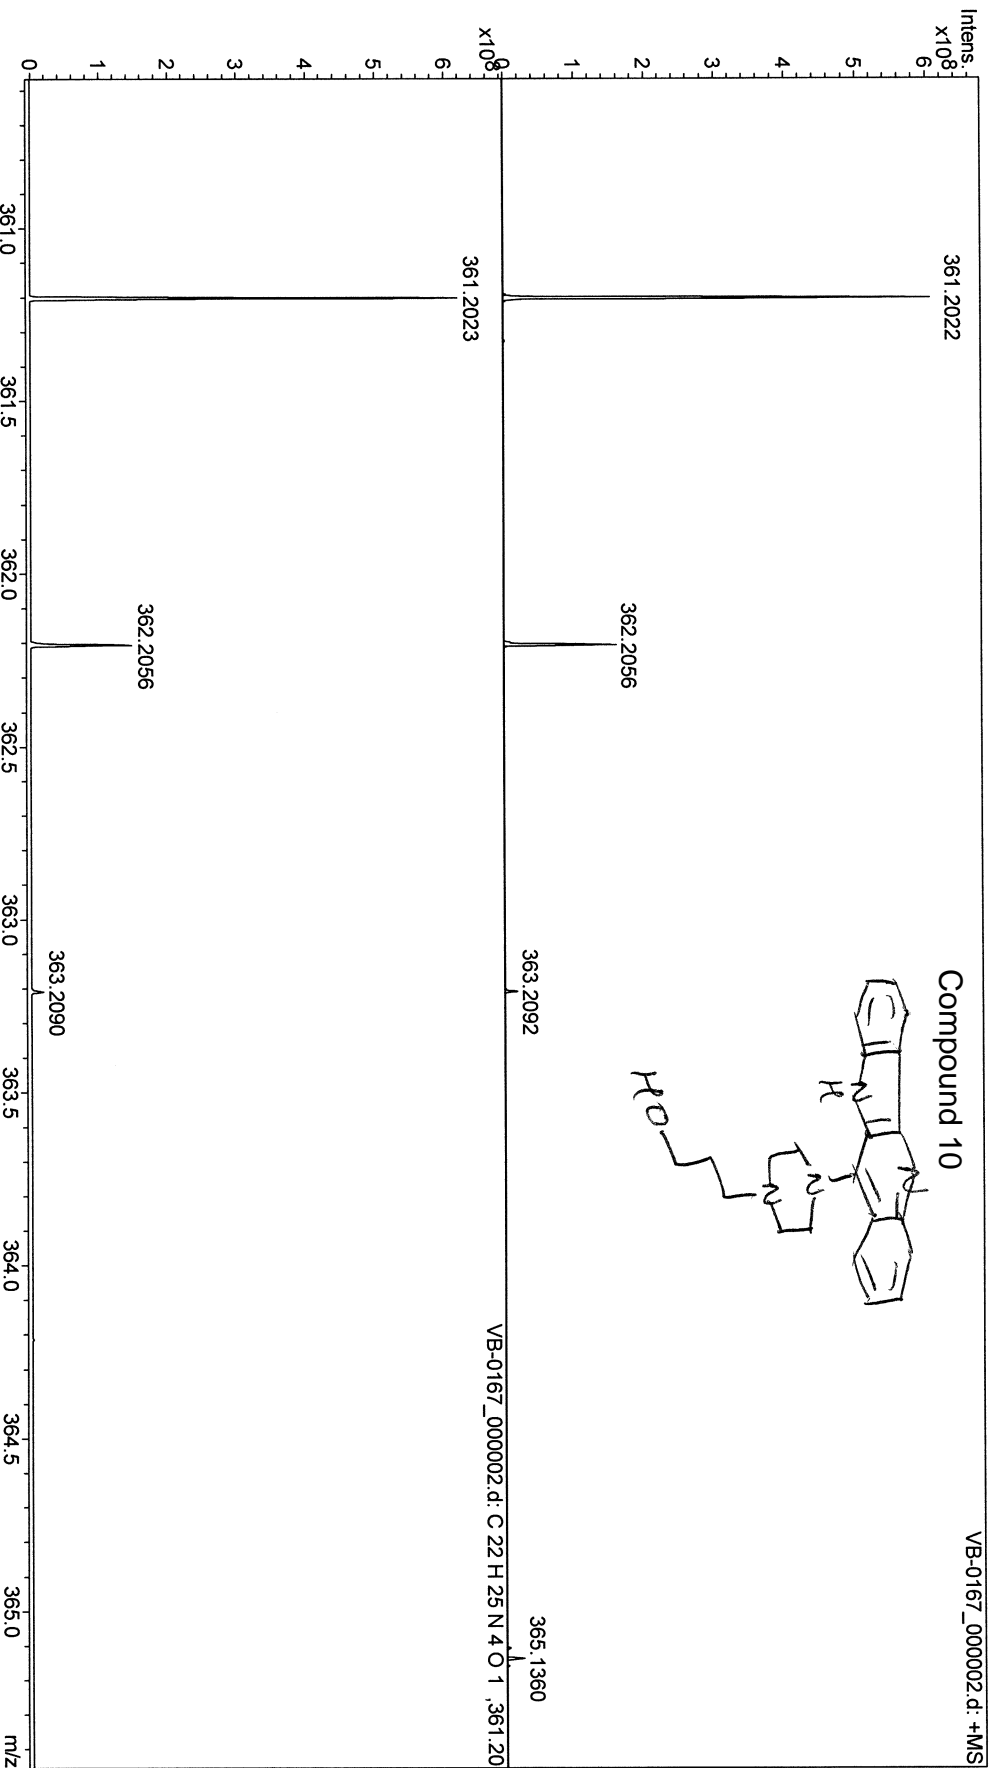

Generate Molecular Formula

Min    
 Max

Note: for m < 2000 the elements C, H, N, and O are considered implicitly.

Measured m/z  Tolerance  mDa  Charge

| # | Mol. Formula                                                  | m/z      | err [mDa] | err [ppm] | err [ppm] | mean err [ppm] | Sigma  |
|---|---------------------------------------------------------------|----------|-----------|-----------|-----------|----------------|--------|
| 1 | C <sub>22</sub> H <sub>25</sub> N <sub>4</sub> O <sub>1</sub> | 361.2022 | 0.08      | 0.2       | 0.2       | -0.1           | 0.0030 |
| 2 | C <sub>21</sub> H <sub>29</sub> O <sub>5</sub>                | 361.2010 | -1.25     | 3.5       | -3.5      | -3.5           | 0.0158 |

Automatically locate monoisotopic peak    Maximum number of formulas   
 Check rings plus double bonds    Minimum     Maximum   
 Apply nitrogen rule    Election configuration   
 Filter H/C element ratio    Minimum H/C     Maximum H/C   
 Estimate carbon number     Generate immediately

Compound 10

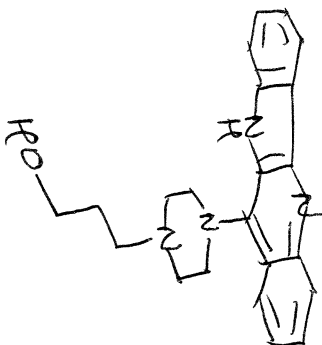

Current Data Parameters  
 NAME VB-Code-6  
 EXPNO 7  
 PROCNO 1

F2 - Acquisition Parameters  
 Date\_ 20080602  
 Time 15.16  
 INSTRUM spect  
 PROBHD 5 mm QNP 1H/1  
 PULPROG zg30  
 TD 65536  
 SOLVENT DMSO  
 NS 16  
 DS 2  
 SMH 6172.839 Hz  
 FIDRES 0.094190 Hz  
 AQ 5.3084660 sec  
 RG 512  
 DW 81.000 use  
 DE 6.00 use  
 TE 300.0 K  
 D1 1.00000000 sec

==== CHANNEL F1 =====  
 NUC1 1H  
 P1 9.25 use  
 PL1 0.00 dB  
 SFO1 300.1318534 MHz

F2 - Processing parameters  
 SI 32768  
 SF 300.1300000 MHz  
 WDW EM  
 SSB 0  
 LB 0.30 Hz  
 GB 0  
 PC 1.00

Compound 11

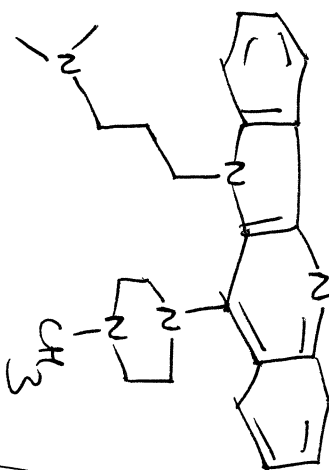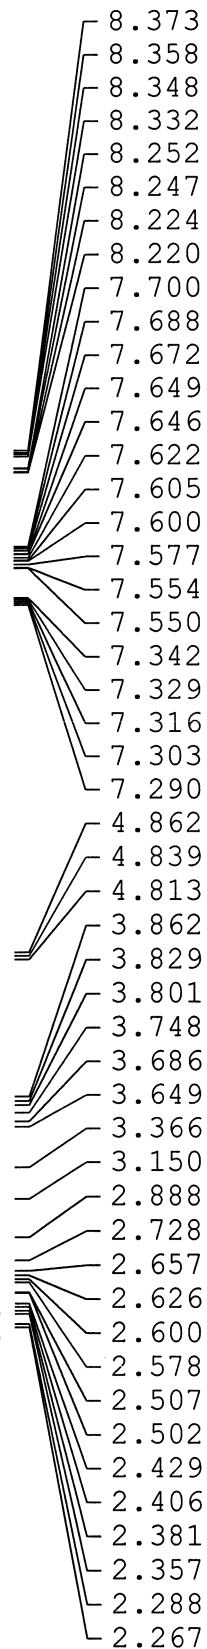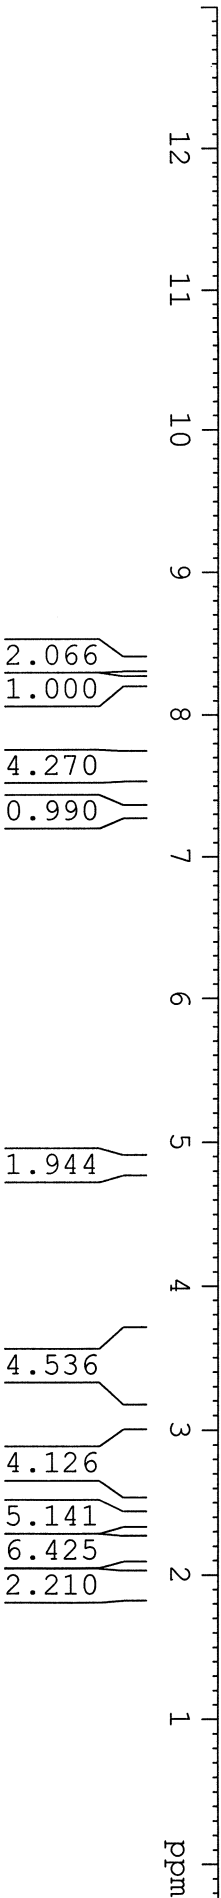

Current Data Parameters  
 NAME VB-Code-6  
 EXPNO 8  
 PROCNO 1

## F2 - Acquisition Parameters

Date\_ 20080529  
 Time\_ 10.15  
 INSTRUM spect  
 PROBD 5 mm QNP 1H/1  
 PULPROG zgpg30  
 TD 65536  
 SOLVENT DMSO  
 NS 14000  
 DS 4  
 SWH 17985.611 Hz  
 FIDRES 0.274439 Hz  
 AQ 1.8219508 sec  
 RG 2048  
 DW 27.800 usec  
 DE 6.00 usec  
 TE 300.0 K  
 D1 2.00000000 sec  
 d11 0.03000000 sec  
 d12 0.00002000 sec

==== CHANNEL f1 =====  
 NUC1 13C  
 P1 6.00 usec  
 PL1 2.00 dB  
 SFO1 75.4752653 MHz

==== CHANNEL f2 =====  
 CPDPRG2 waltz16  
 NUC2 1H  
 PCPD2 90.00 usec  
 PL2 0.00 dB  
 PL12 20.00 dB  
 PL13 20.00 dB  
 SFO2 300.1312005 MHz

F2 - Processing parameters  
 SI 32768  
 SF 75.4677190 MHz  
 WDW EM  
 SSB 0  
 LB 1.00 Hz  
 GB 0  
 PC 1.40

148.270  
 145.924  
 145.593  
 136.493  
 130.909  
 130.831  
 129.940  
 127.563  
 126.648  
 125.224  
 124.790  
 122.004  
 121.916  
 120.610  
 110.515

57.111  
 55.906  
 51.369  
 47.221  
 46.030  
 42.959  
 41.180  
 40.902  
 40.624  
 40.346  
 40.068  
 39.790  
 39.512  
 28.166

Compound 11

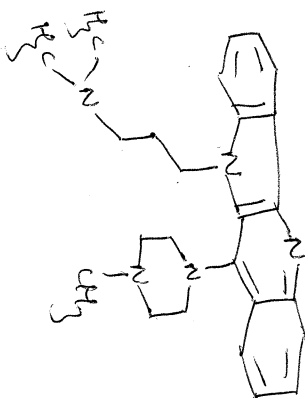

200  
 180  
 160  
 140  
 120  
 100  
 80  
 60  
 40  
 20  
 0  
 ppm

=====  
Injection Date : 5/29/08 3:32:48 PM  
Sample Name : VB-2-arms Vial : 13  
Acq. Operator : Karen Inj : 1  
Inj Volume : 0.1 µl  
Acq. Method : D:\HPCHEM\1\METHODS\SCOTT\_C.M  
Last changed : 5/29/08 3:12:04 PM by Karen  
(modified after loading)  
Analysis Method : D:\HPCHEM\1\METHODS\SCOTT\_C.M  
Last changed : 5/29/08 3:49:22 PM by Karen  
(modified after loading)  
Zorbax C18 SB column, 3.5µ, 4.6 x 150mm, mp=30/70/0.175, MeOH:water:HAc; scan 150-500; flow  
0.5mL/min; vcap 2500, frag 70; col temp 35  
=====

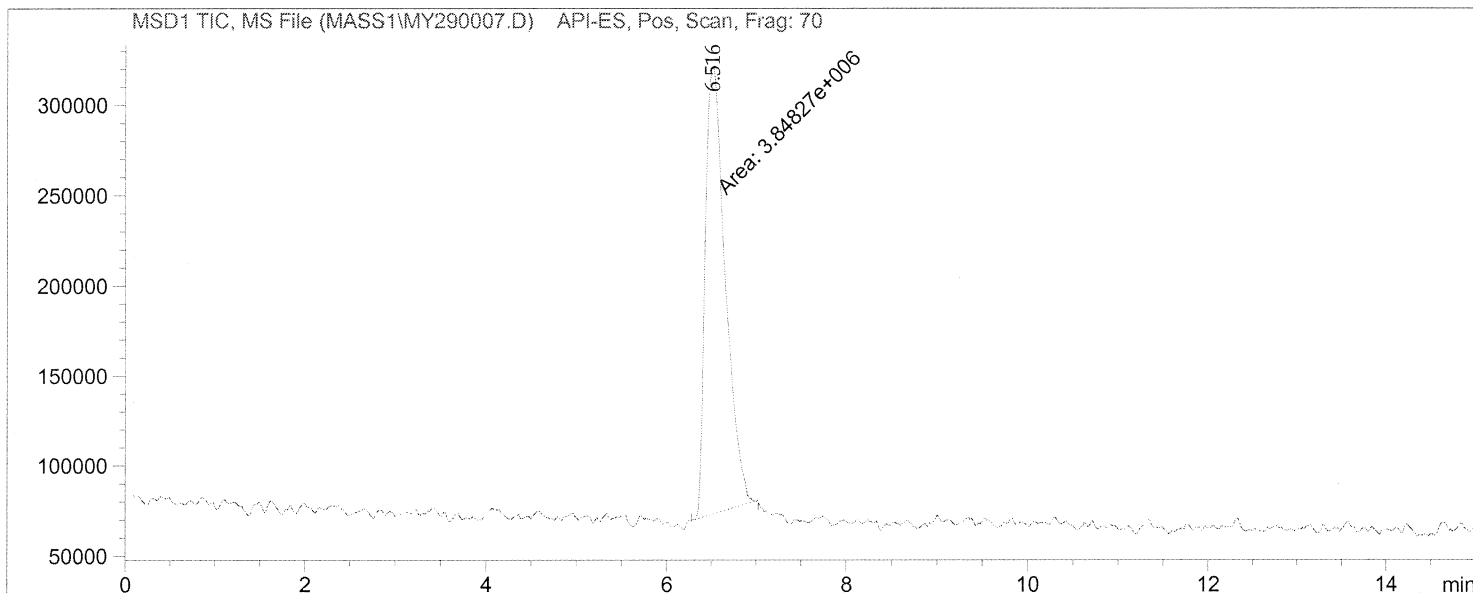

=====  
Area Percent Report  
=====

Sorted By : Retention Time  
Calib. Data Modified : Tuesday, November 27, 2007 2:17:56 PM  
Multiplier : 1.0000  
Dilution : 1.0000

Signal 1: MSD1 TIC, MS File

| Peak # | RetTime [min] | Sig | Type | Area      | Area %   | Name |
|--------|---------------|-----|------|-----------|----------|------|
| 1      | 6.516         | 1   | MM   | 3.84827e6 | 100.0000 | ✓    |

Totals : 3.84827e6

1 Warnings or Errors :

Warning : Calibration warnings (see calibration table listing)

=====  
\*\*\* End of Report \*\*\*  
=====

Compound 11

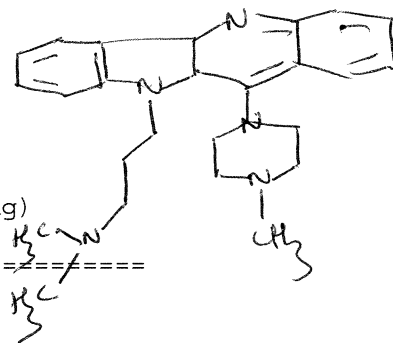

=====  
Injection Date : 5/29/08 3:32:48 PM  
Sample Name : VB-2-arms  
Acq. Operator : Karen  
Vial : 13  
Inj : 1  
Inj Volume : 0.1 µl  
Acq. Method : D:\HPCHEM\1\METHODS\SCOTT\_C.M  
Last changed : 5/29/08 3:12:04 PM by Karen  
(modified after loading)  
Analysis Method : D:\HPCHEM\1\METHODS\SCOTT\_C.M  
Last changed : 5/29/08 3:49:22 PM by Karen  
(modified after loading)  
Zorbax C18 SB column, 3.5µ, 4.6 x 150mm, mp=30/70/0.175, MeOH:water:HAc; scan 150-500; flow 0.5mL/min; vcap 2500, frag 70; col temp 35

Current Chromatogram(s)

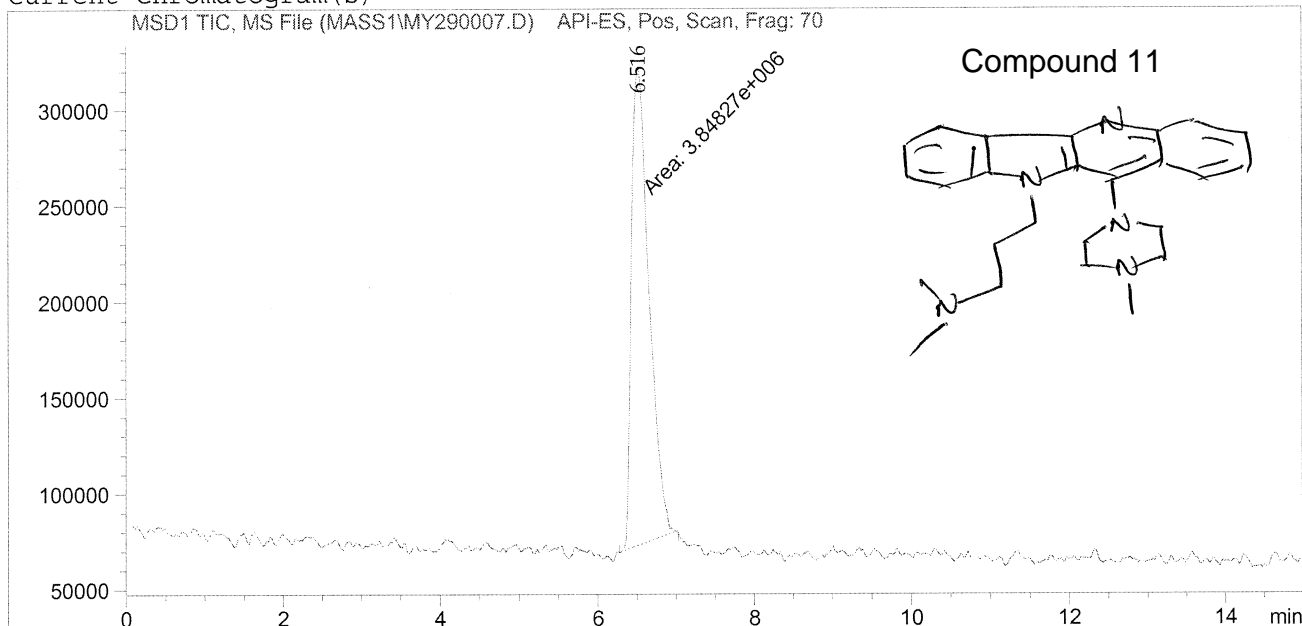

MS Spectrum

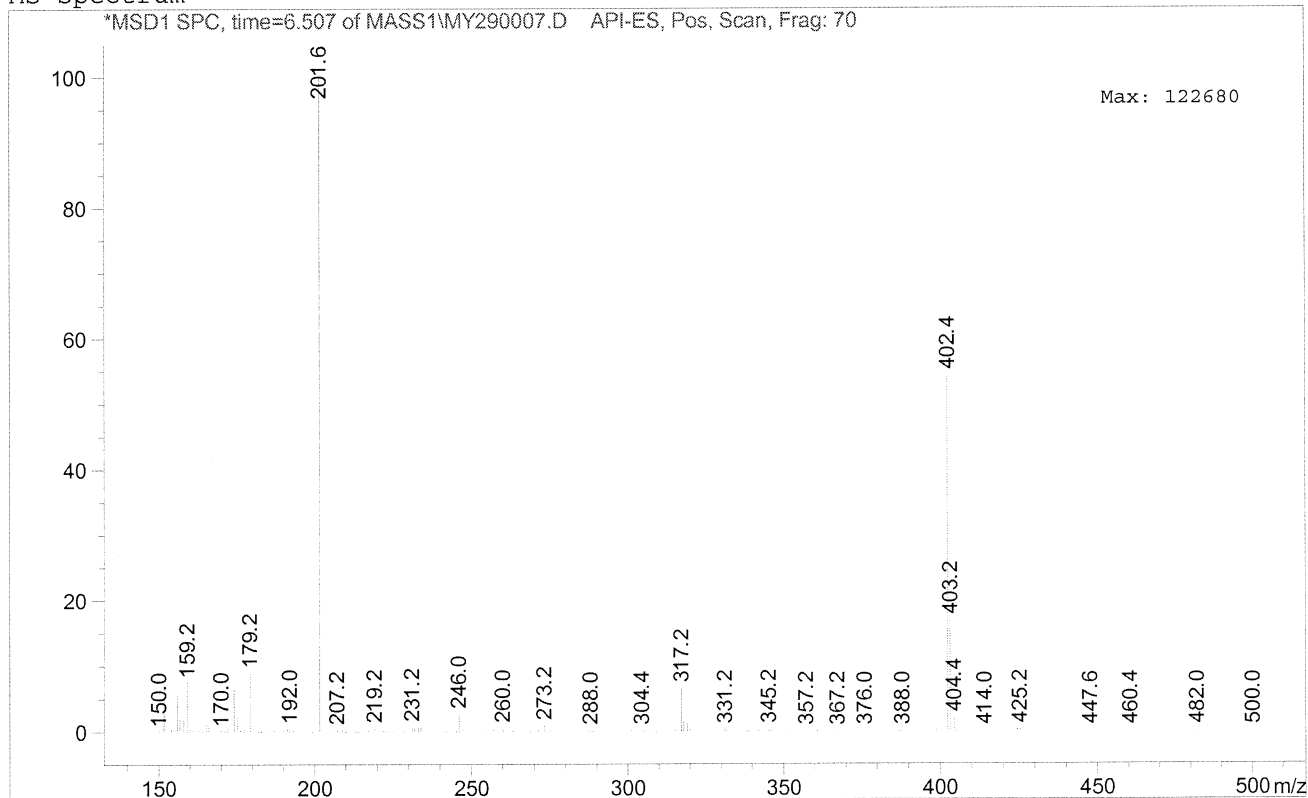

95  
100  
201.2  
[M+2H]<sup>2+</sup>

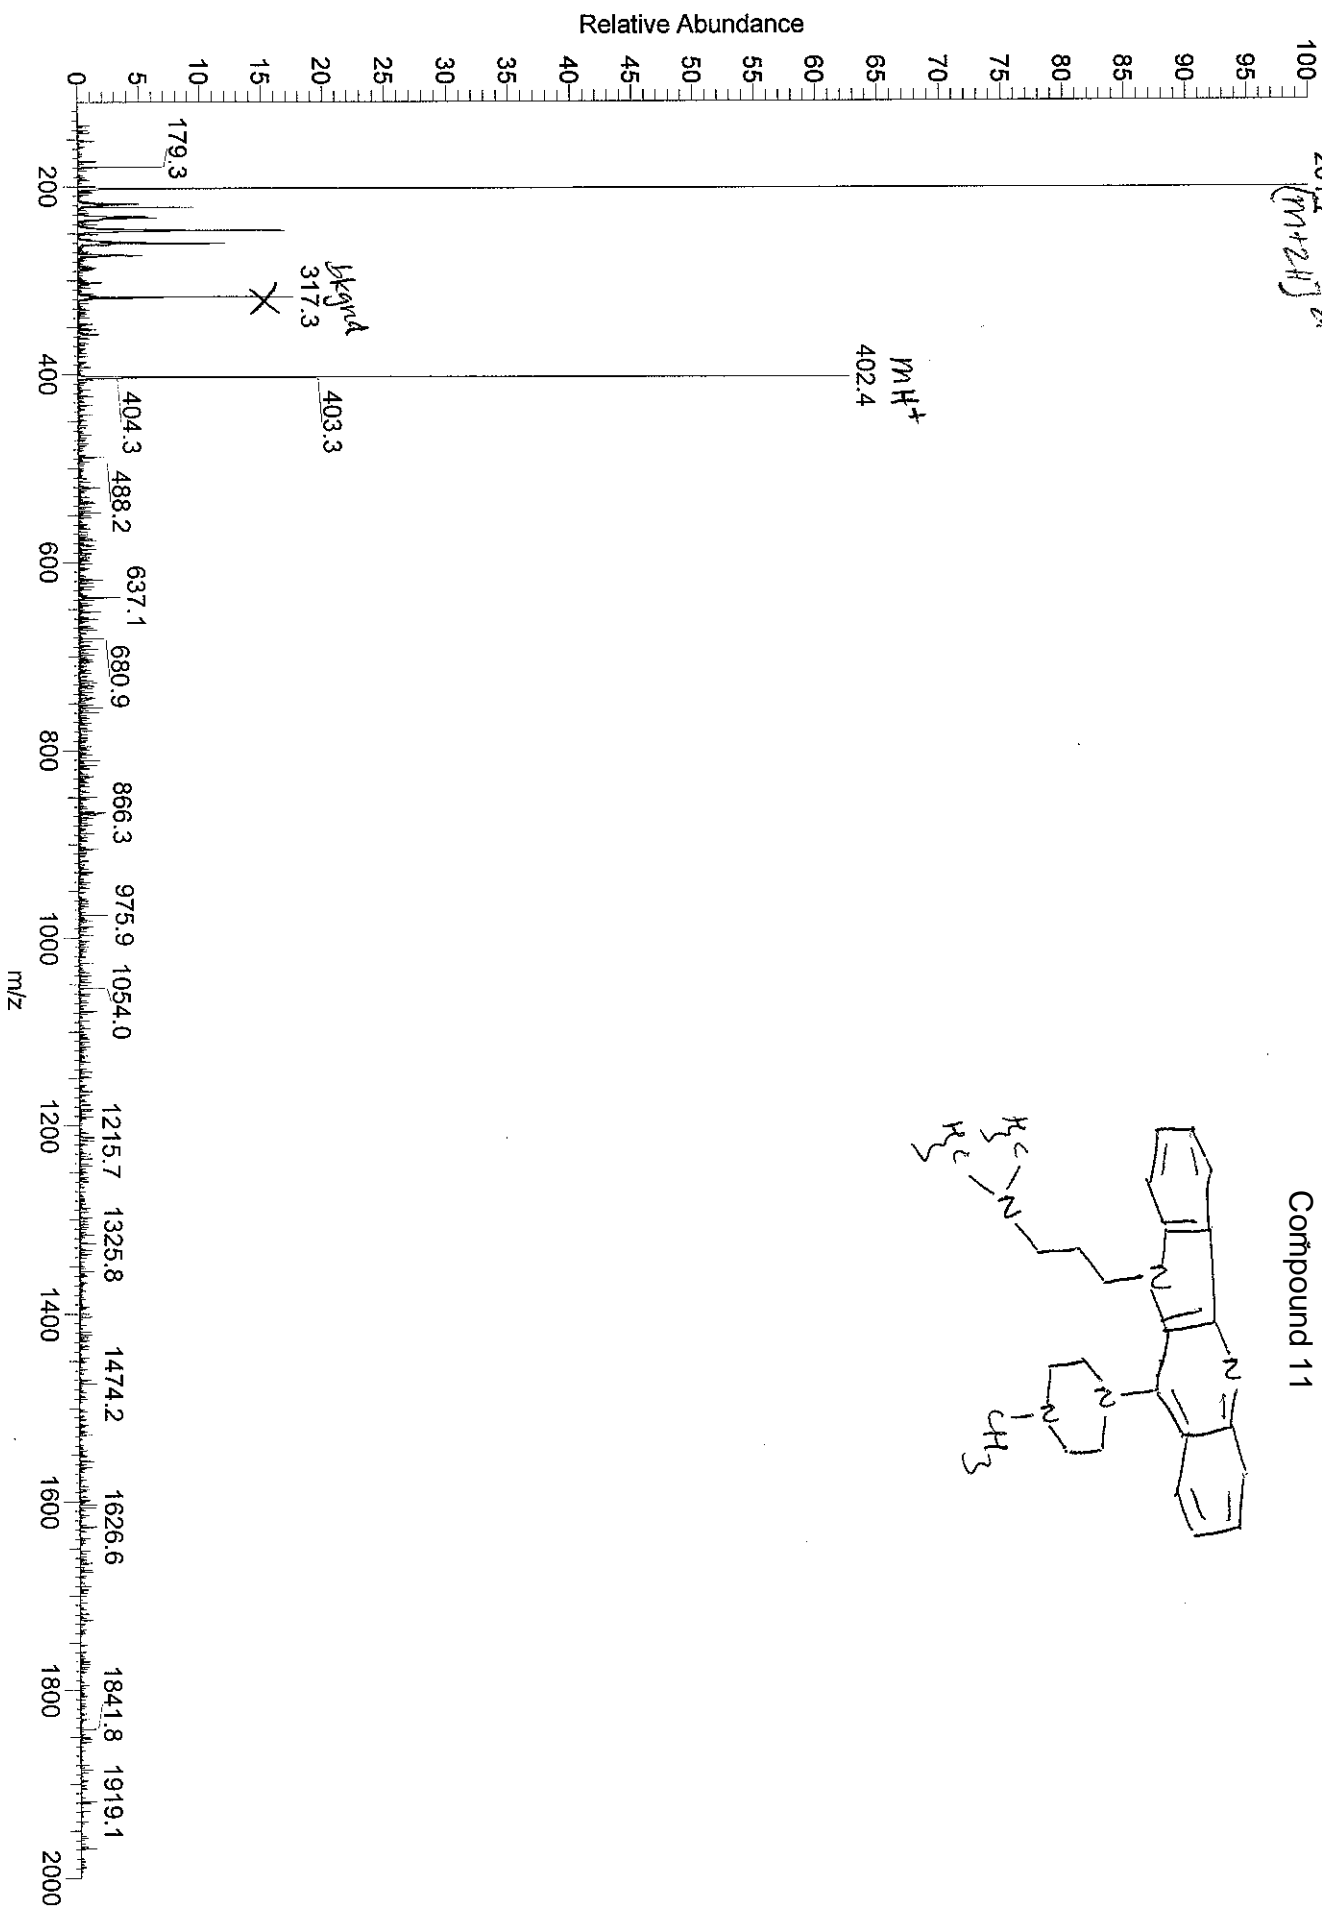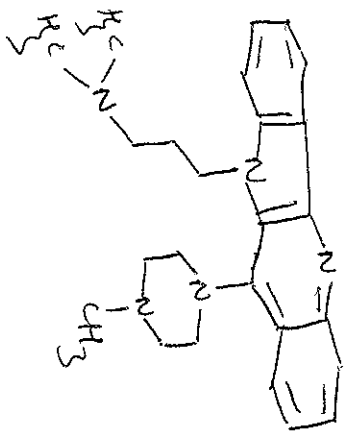

VB\_46 #44-49 RT: 1.22-1.38 AV: 6 NL: 3.48E6  
9 T: + p Full ms [110.00-2000.00]

Compound 11

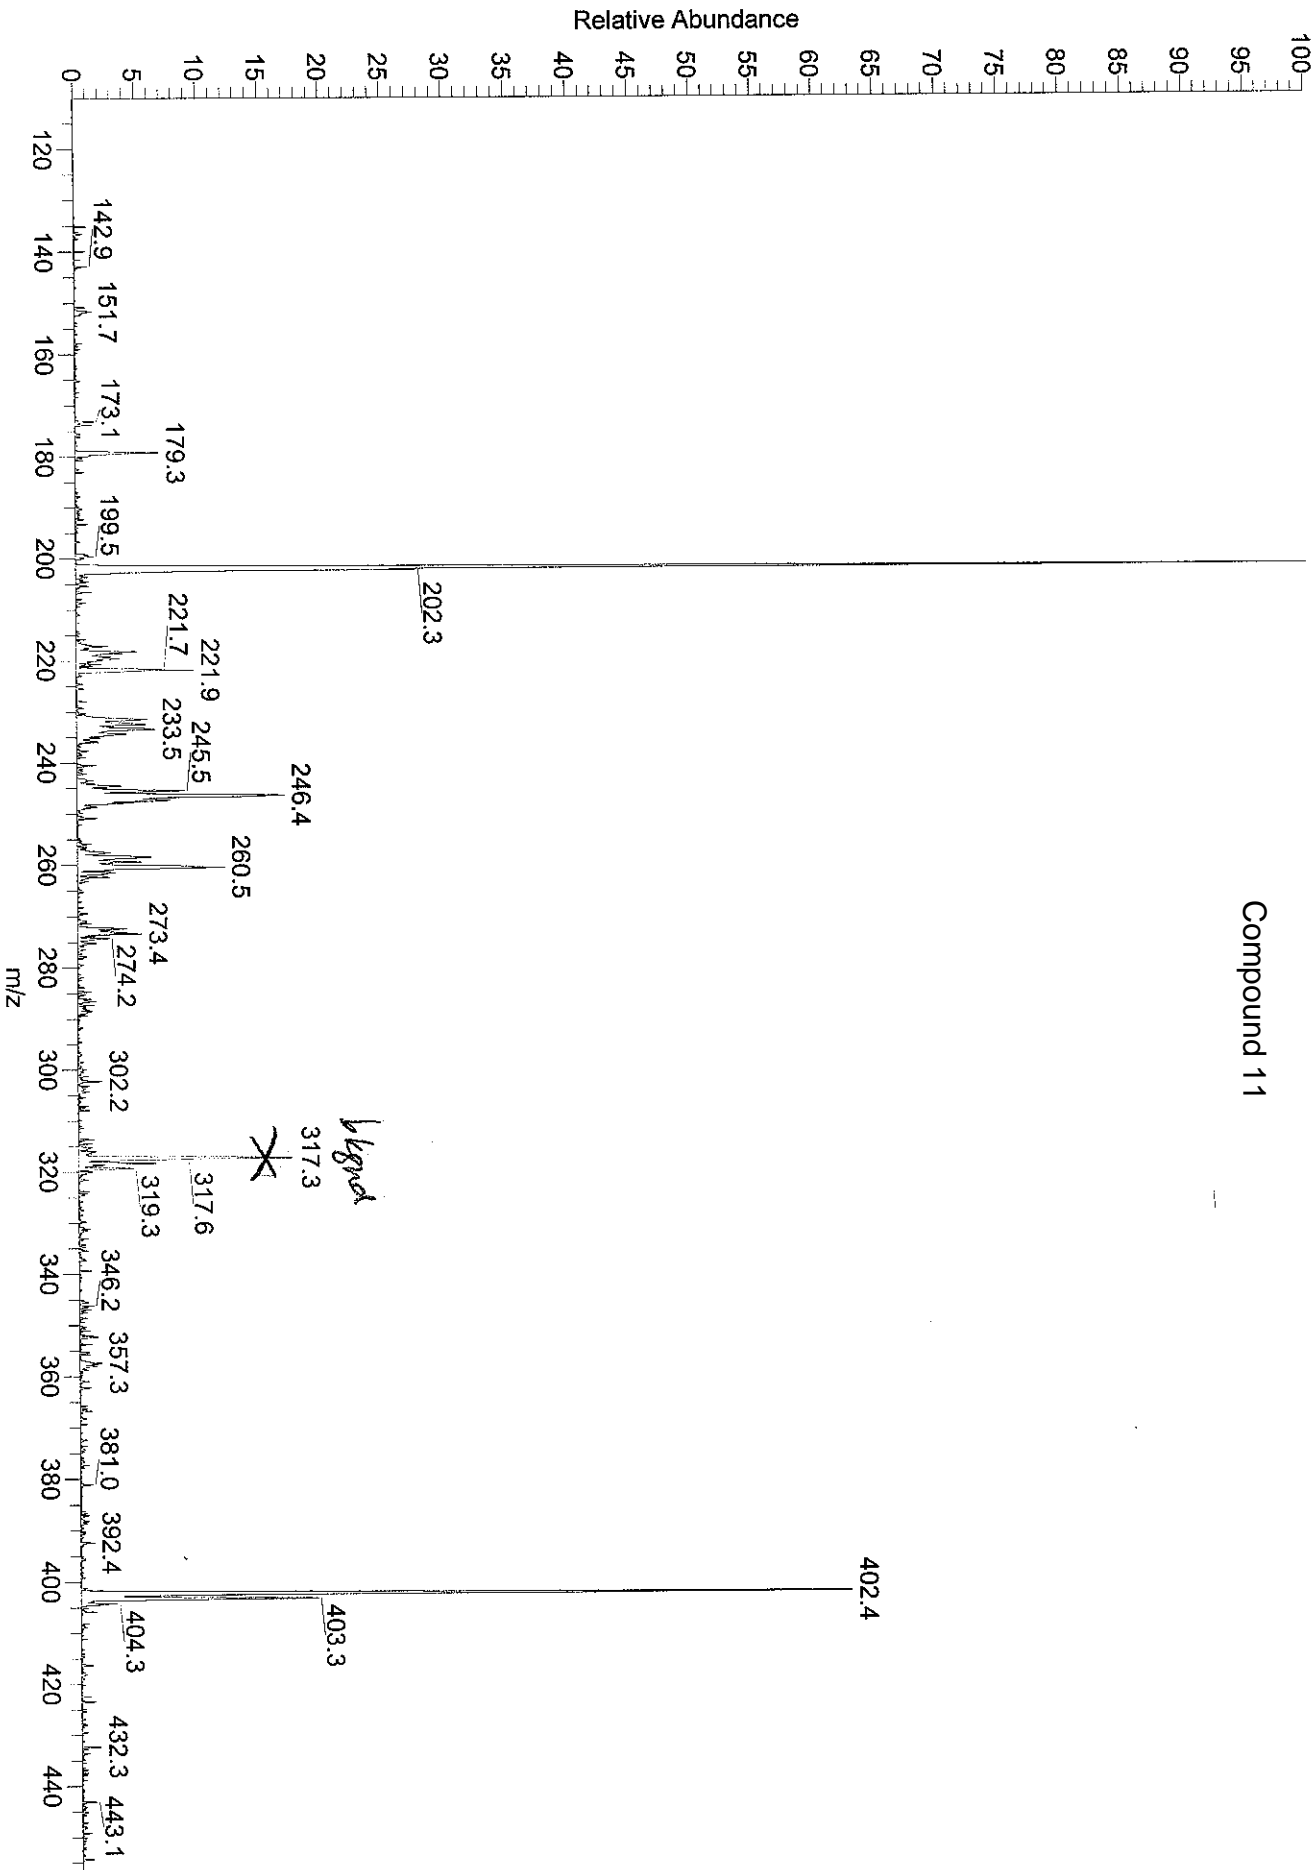



VB\_46 #8-14 RT: 0.21-0.31 AV: 7 NL: 1.13E6  
T: + Z ms [397.00-407.00]

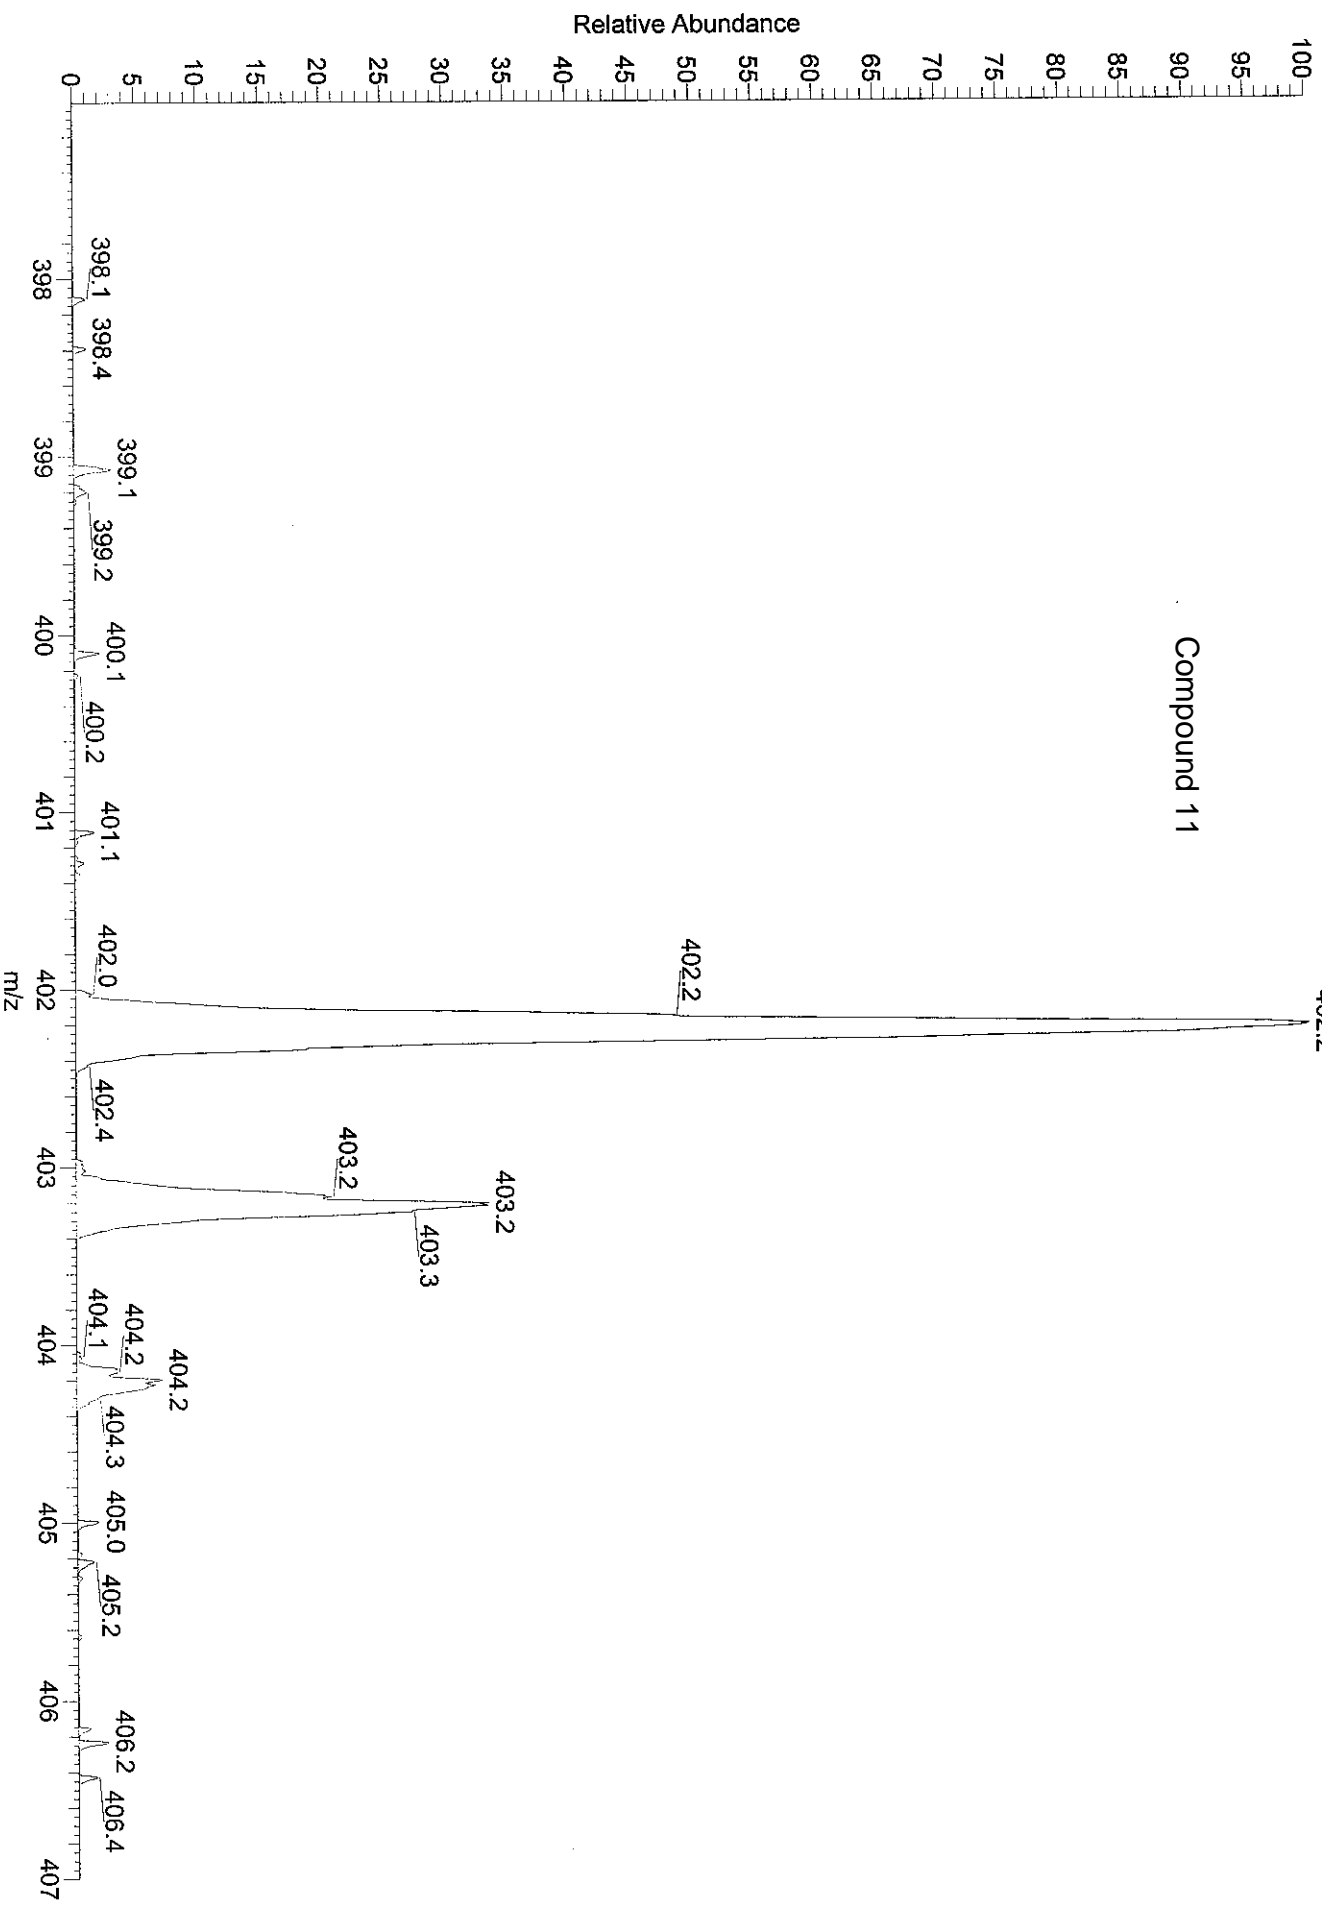

VB\_46 #30-33 RT: 0.86-0.97 AV: 4 NL: 3.56E5  
T: + p Full ms2 402.90@27.00 [110.00-2000.00]

Compound 11

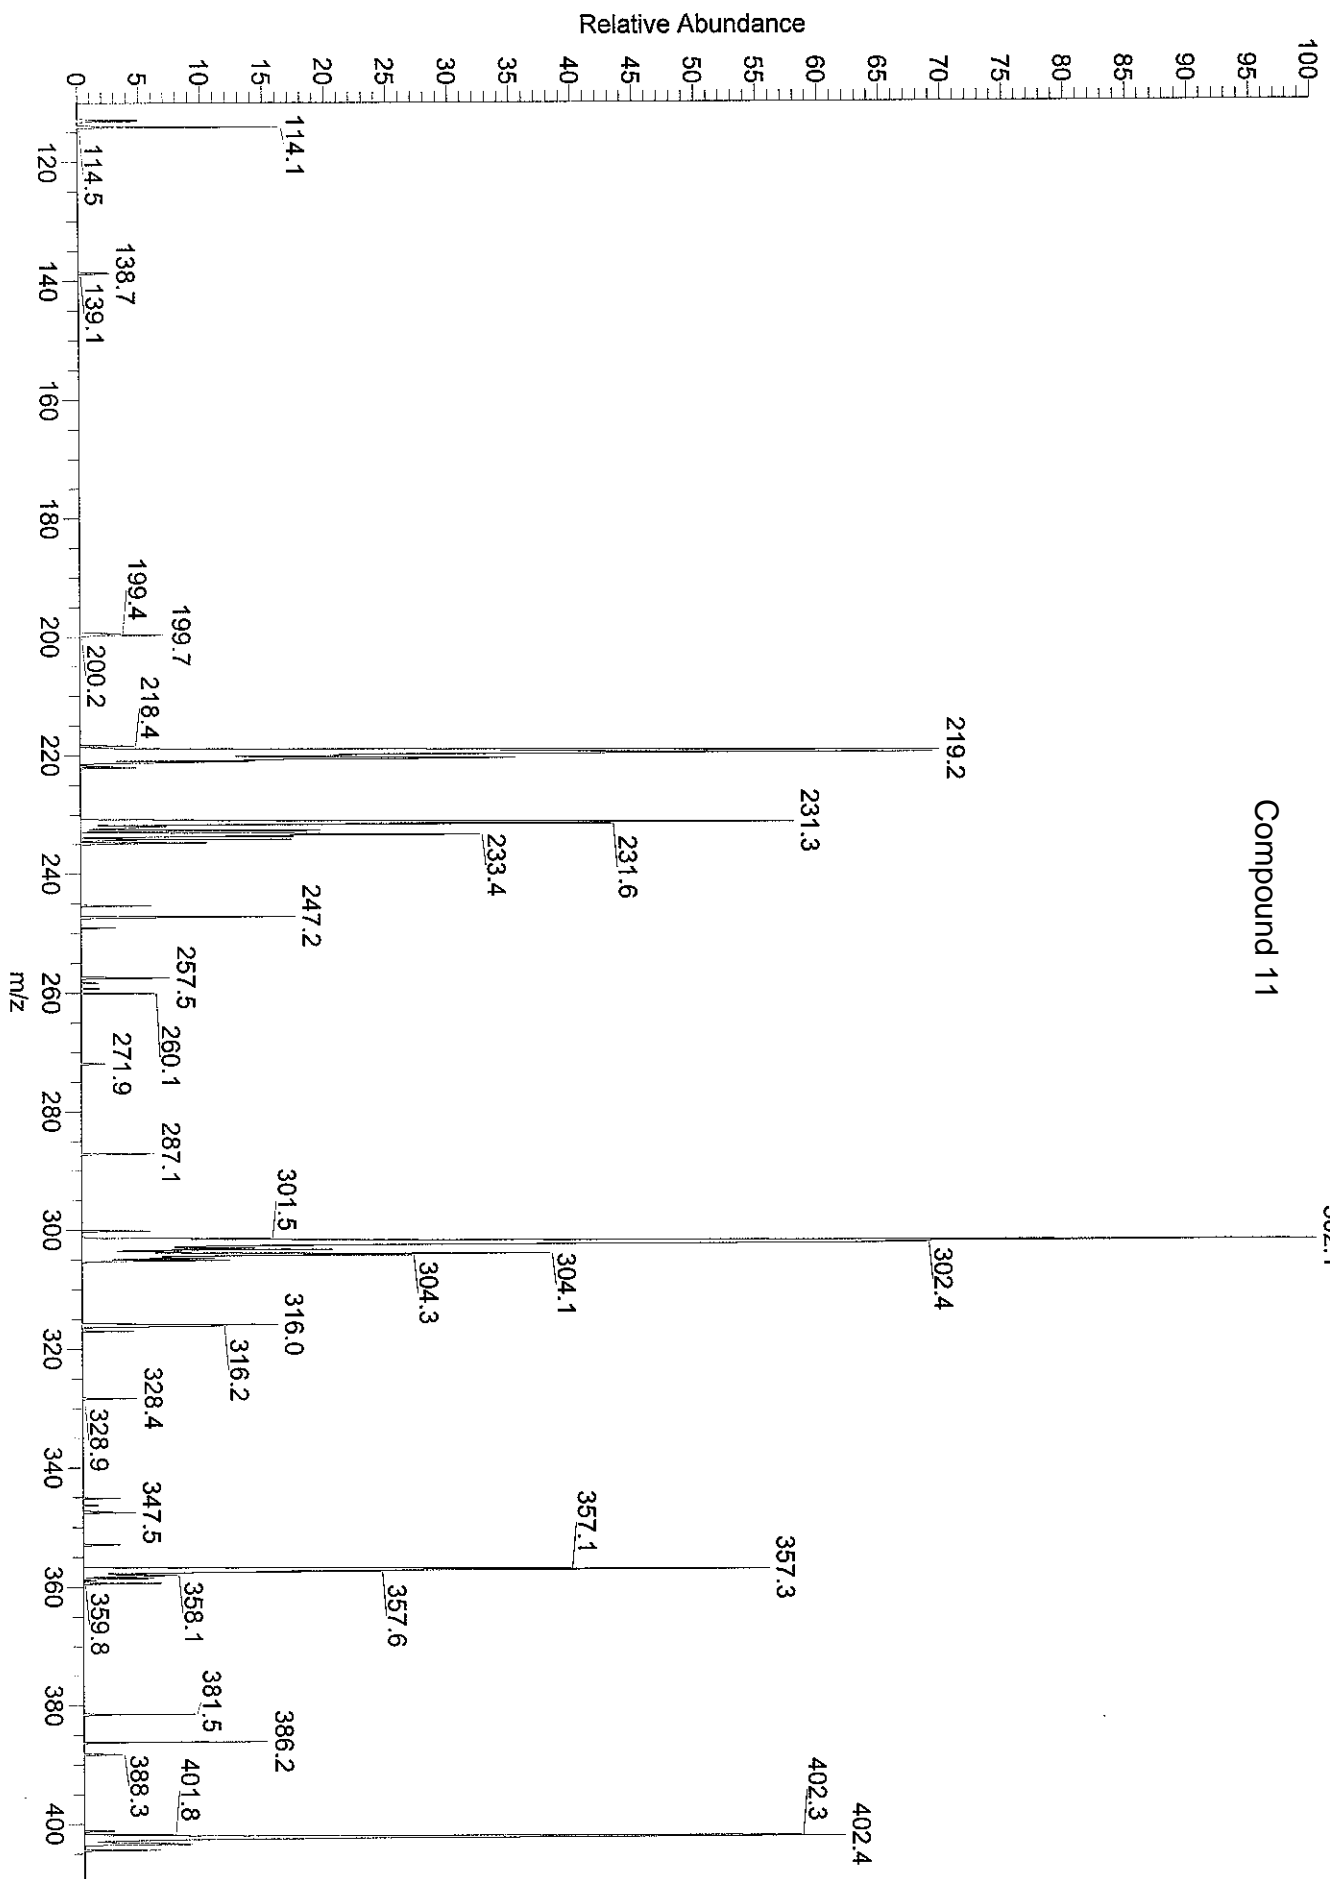

VB\_46 #38-42 RT: 1.12-1.19 AV: 5 NL: 2.24E6  
T: + Z ms [196.00-206.00]

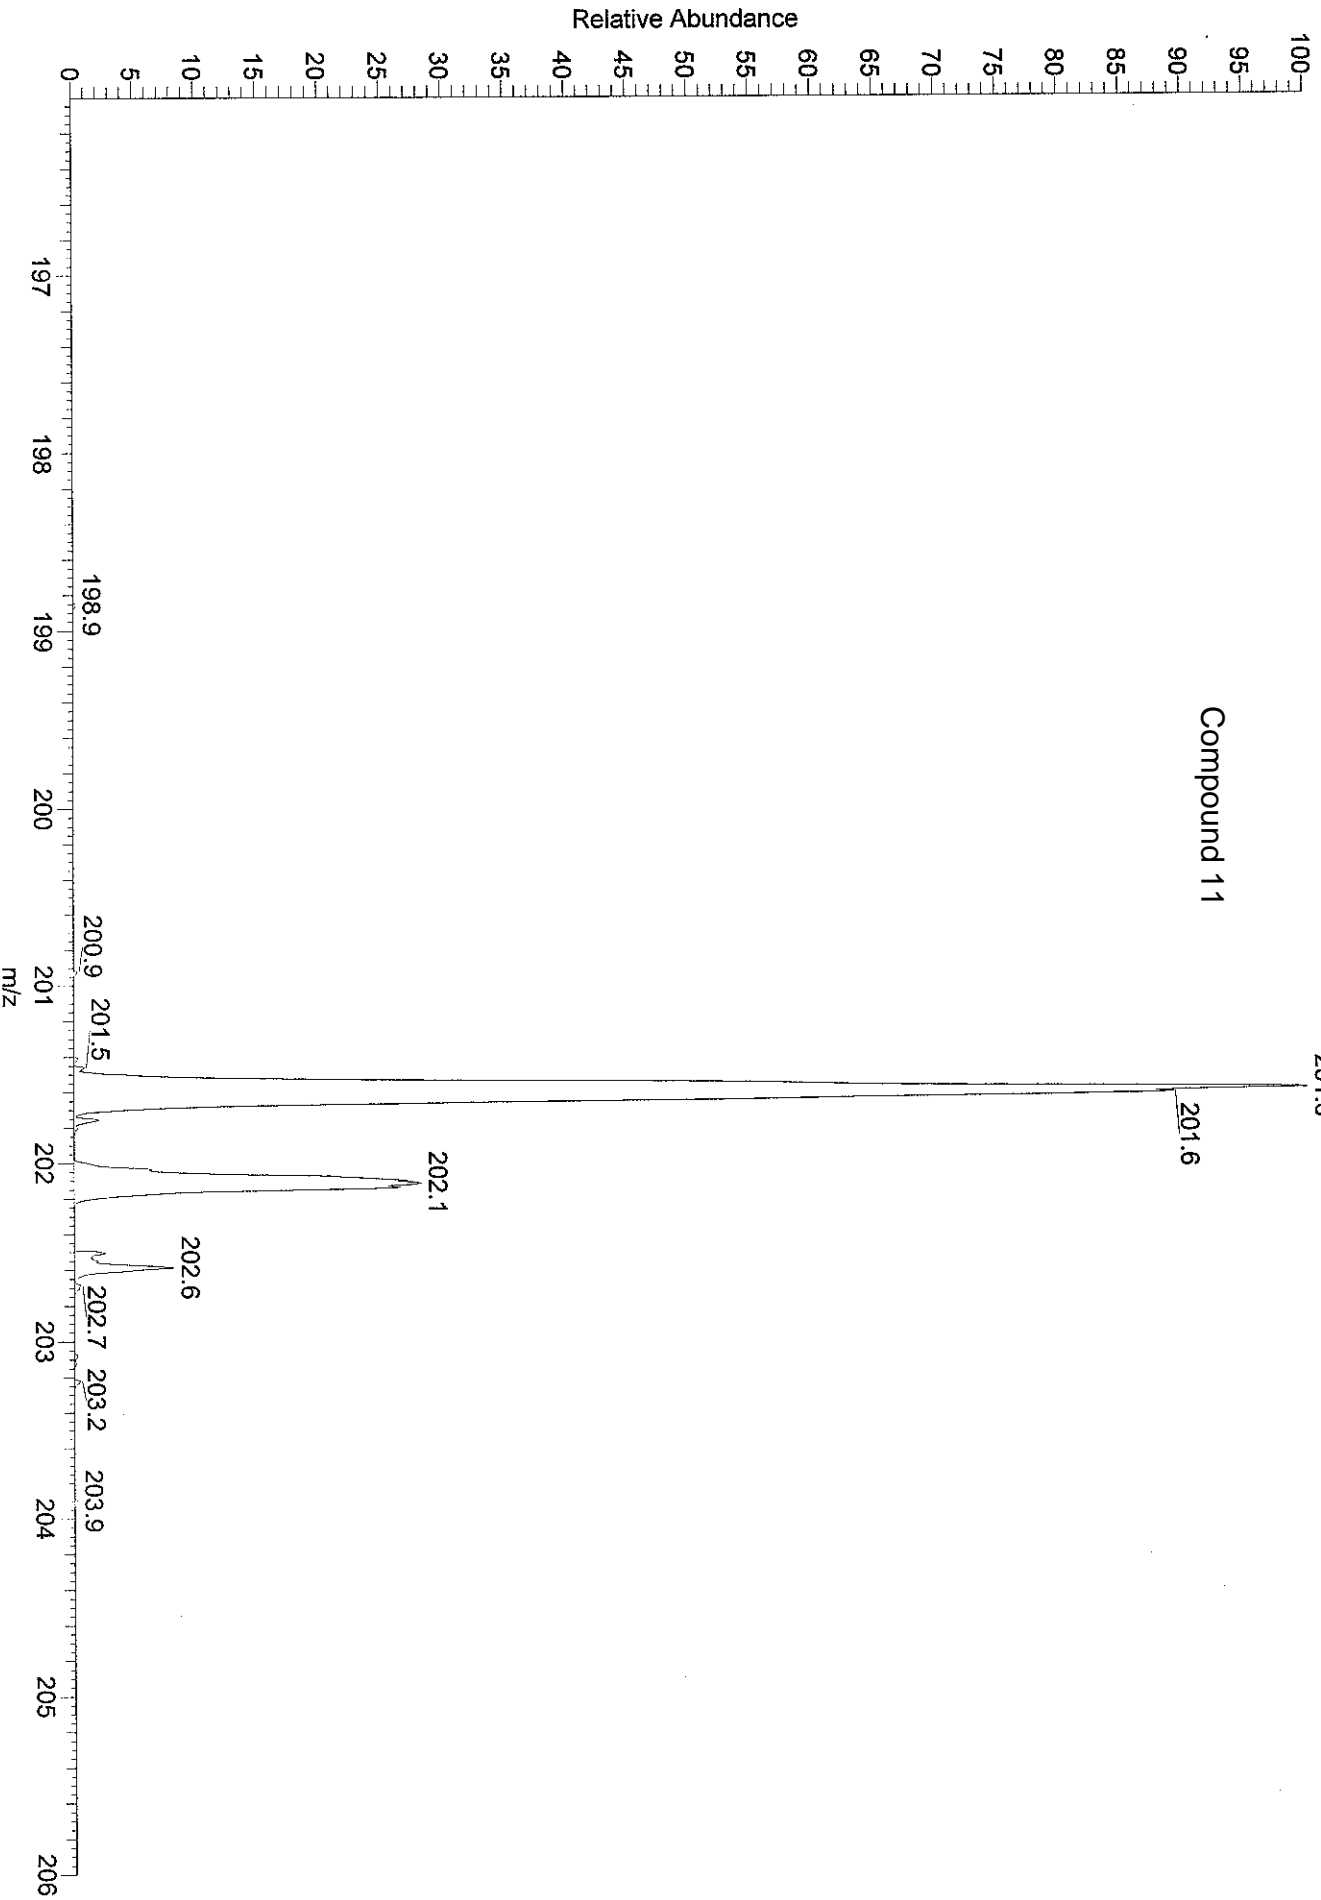

## Generic Display Report

## Analysis Info

Analysis Name D:\DATA\Facility\_May\_5\VB\_46\_000001.d  
Method ESI\_101506  
Sample Name VB-46  
Comment Venkat B., MeOH:H2O:AcOH

Acquisition Date 5/27/2008 1:14:23 PM

Operator Administrator  
Instrument apex-Qe

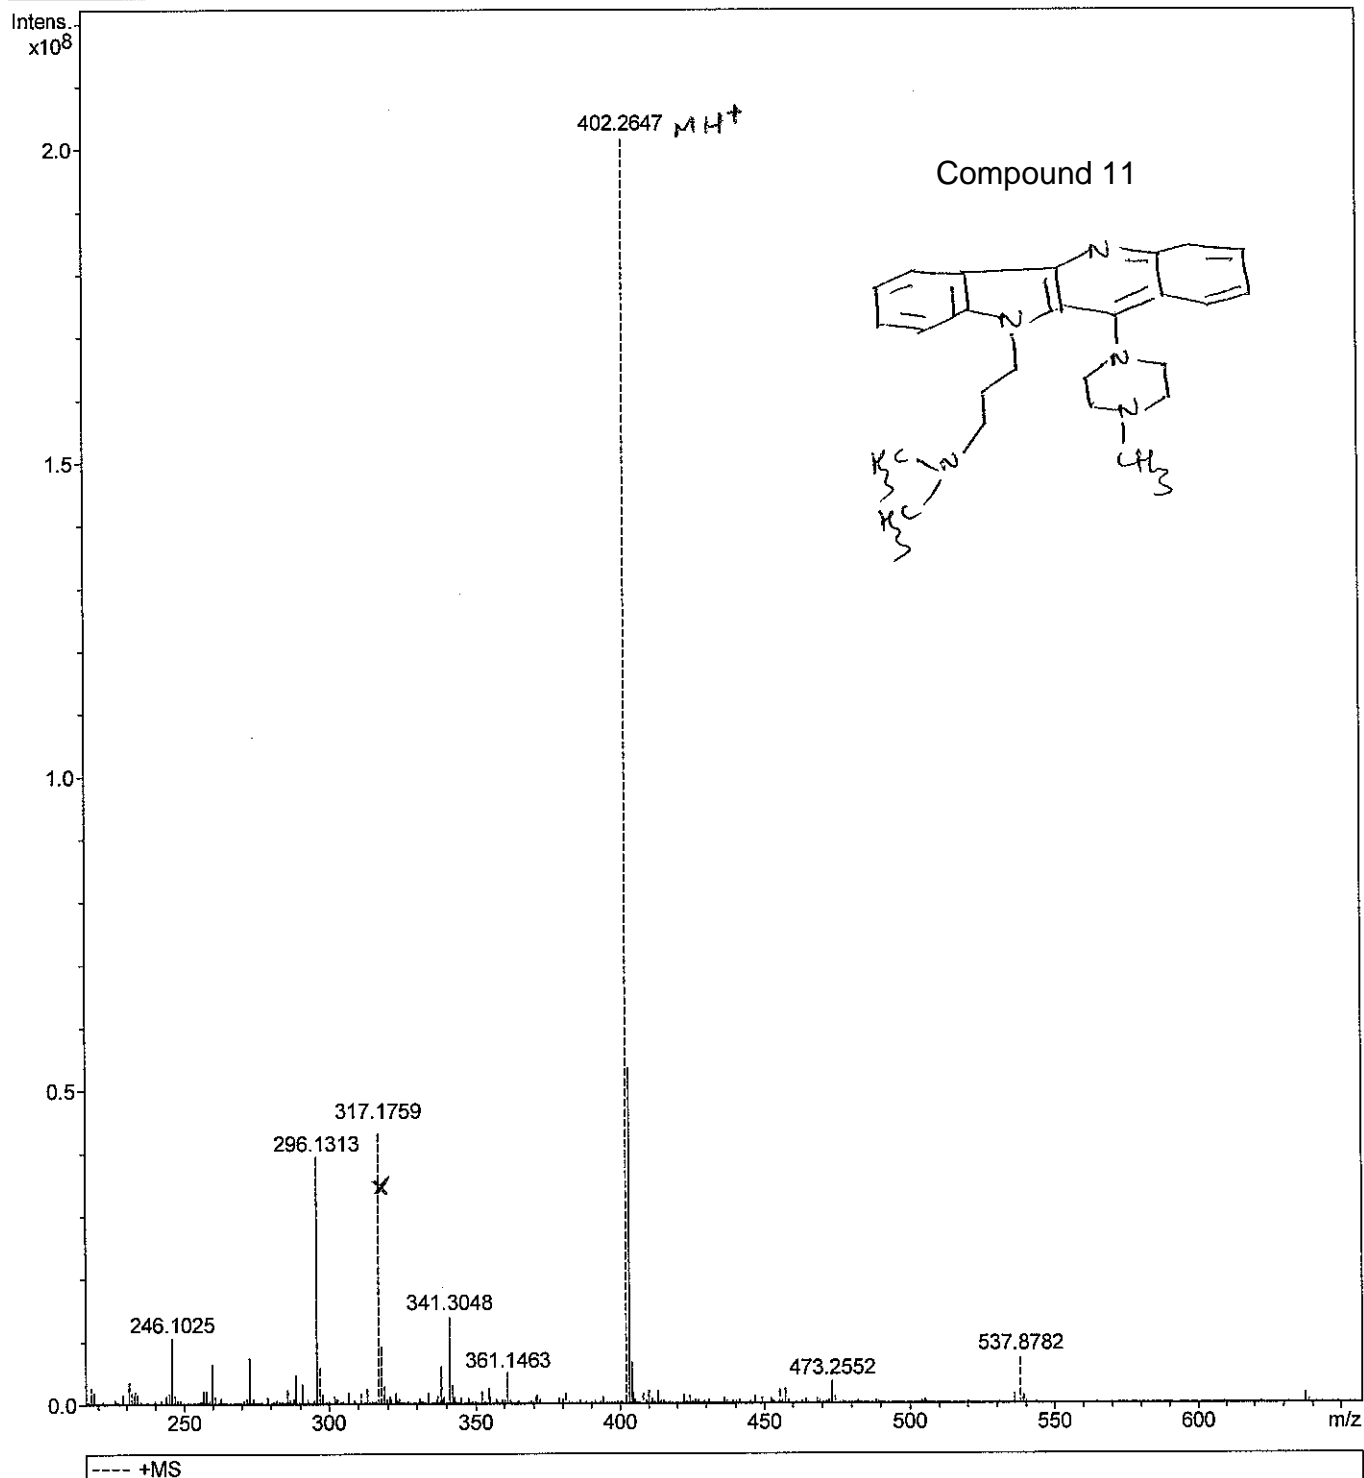

## Generic Display Report

## Analysis Info

Analysis Name D:\DATA\Facility\_May\_5\VB\_46\_000001.d  
Method ESI\_101506  
Sample Name VB-46  
Comment Venkat B., MeOH:H2O:AcOH

Acquisition Date 5/27/2008 1:14:23 PM

Operator Administrator  
Instrument apex-Qe

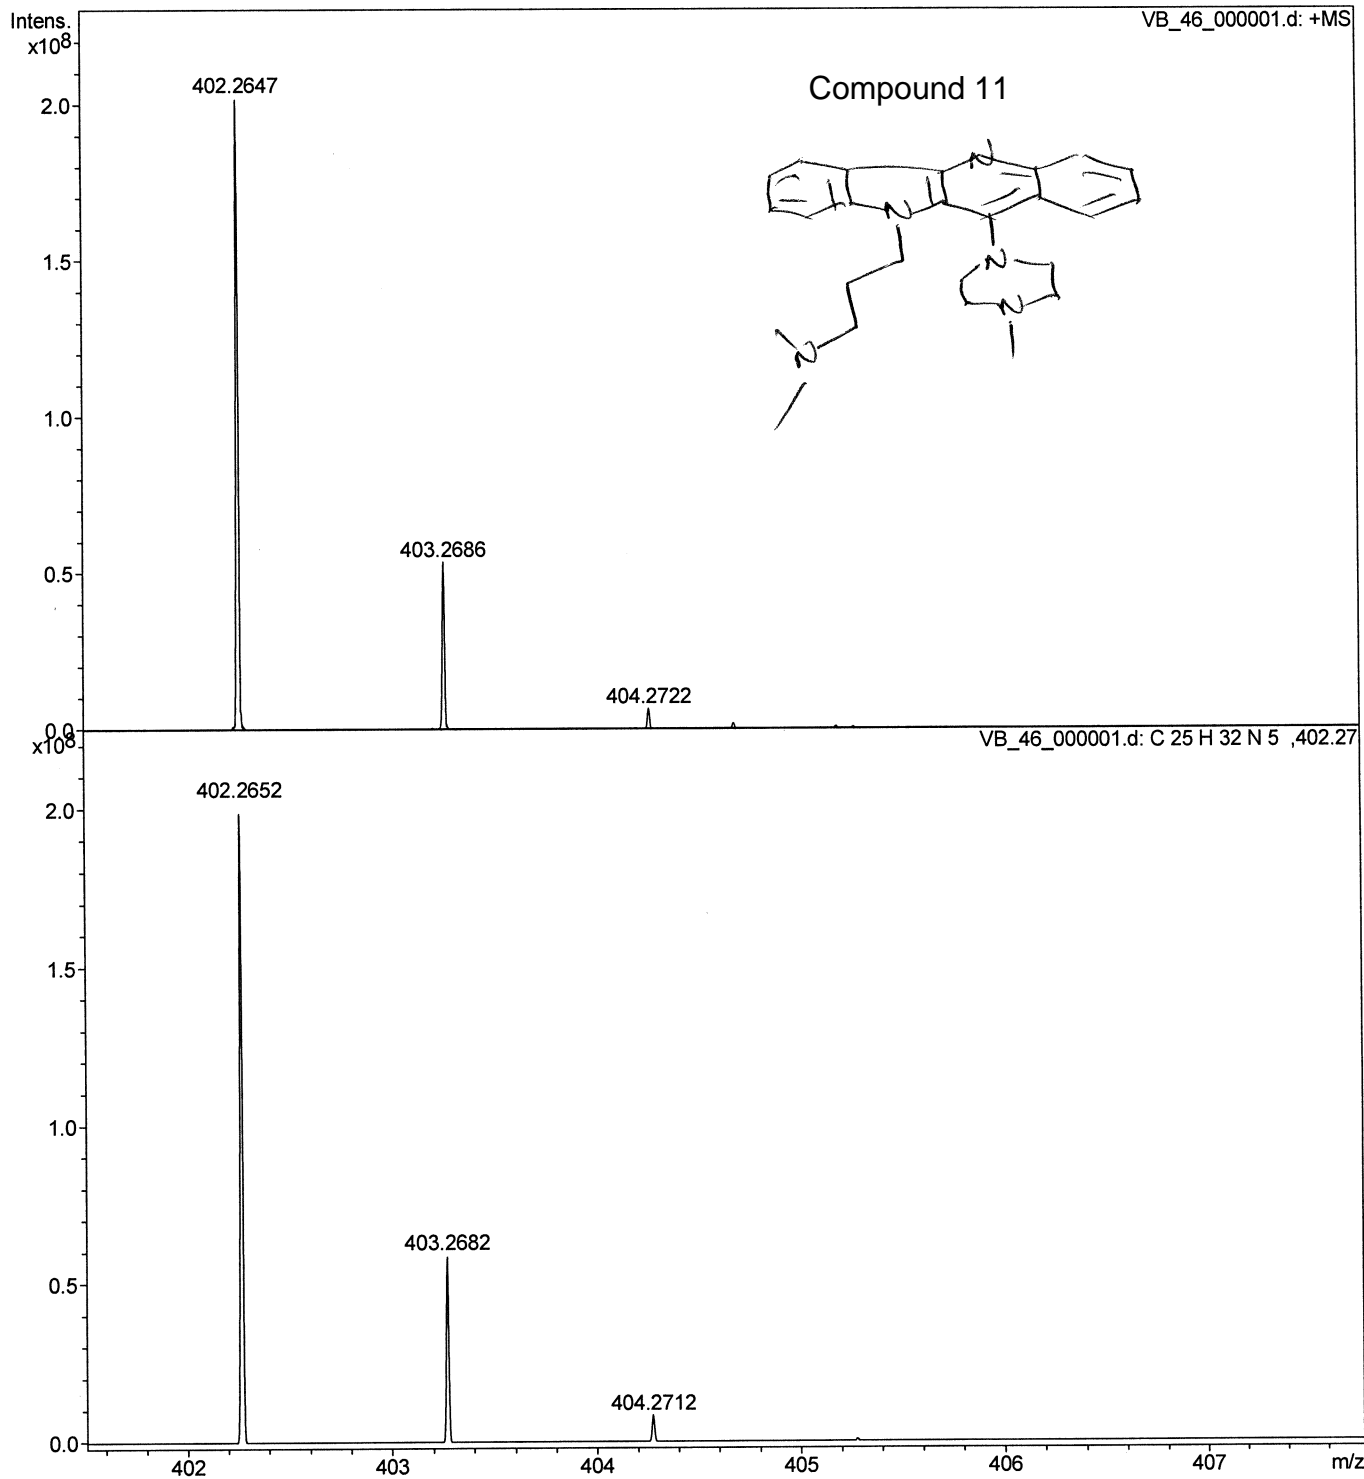

**Generate Molecular Formula** ? X

Min

Max

Note: for m < 2000 the elements C, H, N, and O are considered implicitly.

Measured m/z  Tolerance  mDa  Charge

| # | Mol. Formula      | m/z      | err [mDa] | len [ppm] | err [ppm] | mean err [ppm] |
|---|-------------------|----------|-----------|-----------|-----------|----------------|
| 1 | C 24 H 36 N 1 O 4 | 402.2639 | -0.83     | 2.1       | -2.1      | -2.5           |
| 2 | C 25 H 32 N 5     | 402.2652 | 0.51      | 1.3       | 1.3       | 0.6            |
| 3 | C 27 H 34 N 2 O 1 | 402.2666 | 1.85      | 4.6       | 4.6       | 4.1            |

Automatically locate monoisotopic peak    Maximum number of formulas

Check rings plus double bonds    Minimum     Maximum

Apply nitrogen rule    Electron configuration

Filter H/C element ratio    Minimum H/C     Maximum H/C

Estimate carbon number     Generate immediately

VB-GSA-118

Compound 12

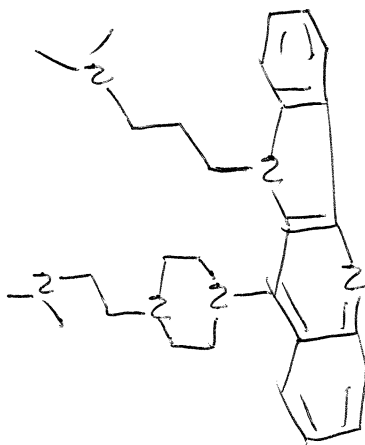

- 8.511
- 8.485
- 8.391
- 8.362
- 8.342
- 8.314
- 7.603
- 7.589
- 7.487
- 7.461
- 7.434
- 7.316
- 7.291
- 7.275
- 7.267
- 4.847
- 4.826
- 4.803
- 4.008
- 3.588
- 3.540
- 3.471
- 3.361
- 3.198
- 3.131
- 2.895
- 2.672
- 2.652
- 2.609
- 2.591
- 2.480
- 2.461
- 2.410
- 2.388
- 2.357
- 2.352
- 2.248
- 2.243
- 2.148
- 2.137
- 2.008
- 1.986
- 1.964
- 1.247

Current Data Parameters  
 NAME VB-GSA-01-118  
 EXPNO 9  
 PROCNO 1

F2 - Acquisition Parameters  
 Date\_ 20081106  
 Time\_ 15.16  
 INSTRUM spect  
 PROBHD 5 mm QNP 1H/1  
 PULPROG zg30  
 TD 65536  
 SOLVENT CDCl3  
 NS 16  
 DS 2  
 SWH 6172.839 Hz  
 FIDRES 0.094190 Hz  
 AQ 5.3084660 sec  
 RG 71.8  
 DW 81.000 usec  
 DE 6.00 usec  
 TE 300.0 K  
 D1 1.00000000 sec

==== CHANNEL f1 =====  
 NUC1 1H  
 P1 9.25 usec  
 PL1 0.00 dB  
 SFO1 300.1318534 MHz

F2 - Processing Parameters  
 SI 32768  
 SF 300.1300000 MHz  
 WDM EM  
 SSB 0  
 LB 0.30 Hz  
 GB 0  
 PC 1.00

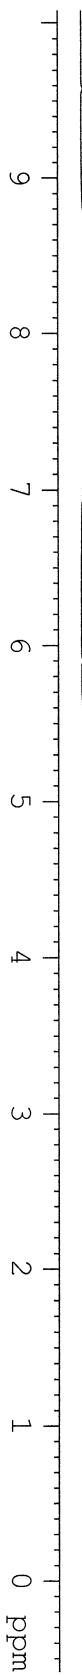

- 1.136
- 2.152
- 2.214
- 2.220
- 1.120
- 0.472
- 2.022
- 2.168
- 4.215
- 2.001
- 2.173
- 10.045
- 6.017
- 2.091

*BR*

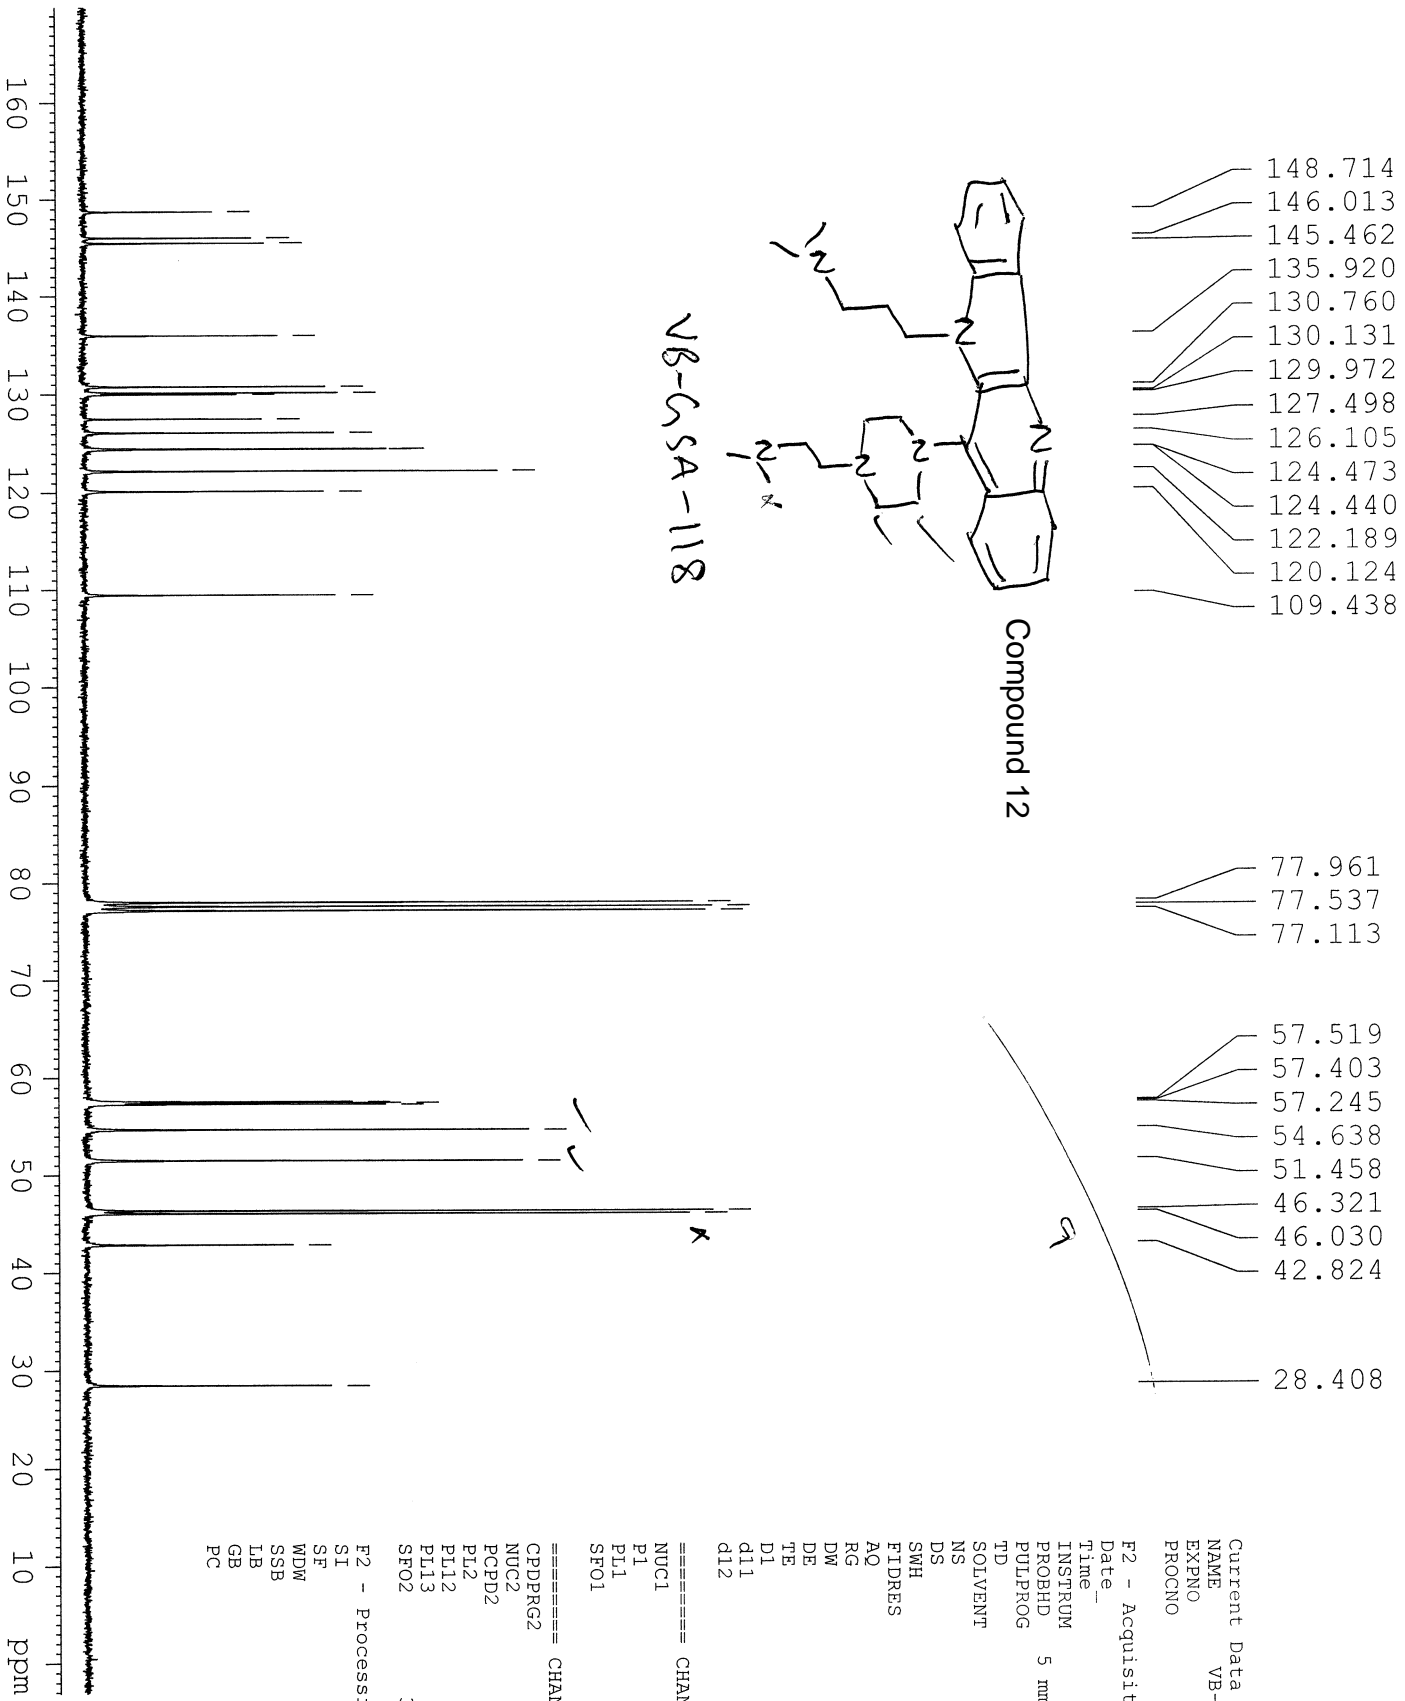

Current Data Parameters  
 NAME VB-GSA-01-118  
 EXPNO 20  
 PROCNO 1

F2 - Acquisition Parameters  
 Date\_ 20081106  
 Time 17.09

INSTRUM 5 mm QNP  
 PROBHD 1H/1  
 PULPROG zgpg30  
 TD 65536  
 SOLVENT CDCl3  
 NS 1407  
 DS 4

SWH 17985.611 Hz  
 FIDRES 0.274439 Hz  
 AQ 1.8219508 sec  
 RG 11585.2  
 DW 27.800 usec  
 DE 6.00 usec  
 TE 300.0 K  
 D1 2.0000000 sec  
 d11 0.0300000 sec  
 d12 0.0000200 sec

==== CHANNEL f1 =====  
 NUC1 13C  
 P1 6.00 usec  
 PL1 2.00 dB  
 SFO1 75.4752653 MHz

==== CHANNEL f2 =====  
 CPDPRG2 waltz16  
 NUC2 1H  
 PCPD2 90.00 usec  
 PL2 0.00 dB  
 PL12 20.00 dB  
 PL13 20.00 dB  
 SFO2 300.1312005 MHz

F2 - Processing parameters  
 SI 32768  
 SF 75.4677190 MHz  
 WDW EM  
 SSB 0  
 LB 1.00 Hz  
 GB 0  
 PC 1.00

160 150 140 130 120 110 100 90 80 70 60 50 40 30 20 10 ppm



=====  
 Injection Date : 11/6/2008 11:25:42 AM  
 Sample Name : VB-GSA-118  
 Acq. Operator : Karen  
 Vial : 1  
 Inj : 1  
 Inj Volume : 0.1 ul  
 Method : D:\HPCHEM\1\METHODS\SCOTT\_C.M  
 Last changed : 11/6/2008 11:01:55 AM by Karen  
 (modified after loading)  
 Zorbax C18 SB column, 3.5u, 4.6 x 150mm, mp=20/80/0.25, MeCN:HOH:HAc (pH2.8); scan 150-550; flow 0.5mL/min; vcap 2500; frag 100; col temp 45  
 =====

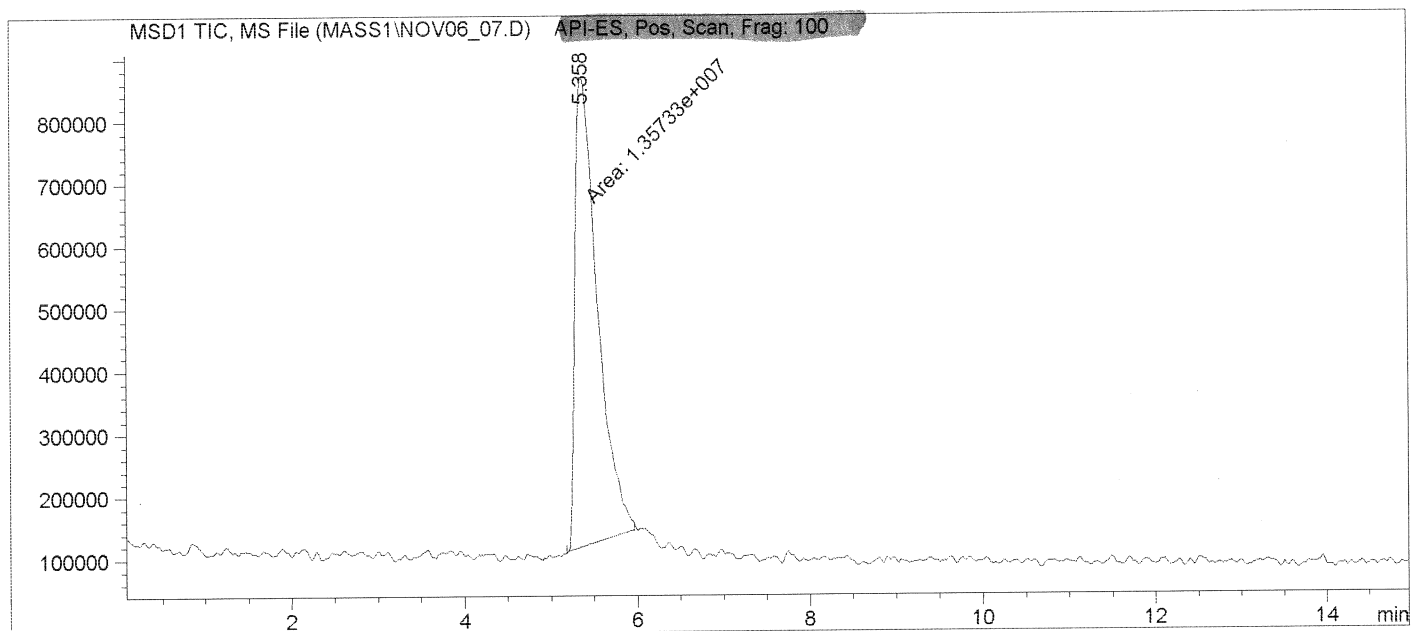

=====  
 Area Percent Report  
 =====

Sorted By : Retention Time  
 Multiplier : 1.0000  
 Dilution : 1.0000

Signal 1: MSD1 TIC, MS File

| Peak # | RetTime [min] | Sig | Type | Area      | Height    | Area %   |
|--------|---------------|-----|------|-----------|-----------|----------|
| 1      | 5.358         | 1   | MM   | 1.35733e7 | 7.55419e5 | 100.0000 |

Totals : 1.35733e7 7.55419e5

Compound 12

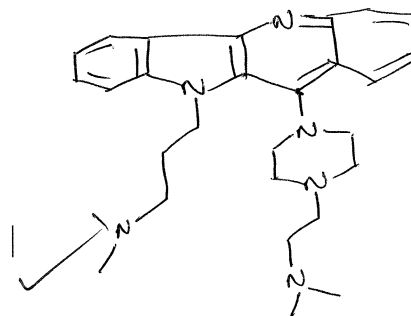

VB-GSA-118

=====  
 \*\*\* End of Report \*\*\*  
 =====

Injection Date : 11/6/2008 11:25:42 AM  
Sample Name : VB-GSA-118  
Acq. Operator : Karen

Vial : 1  
Inj : 1  
Inj Volume : 0.1 ul

Method : D:\HPCHEM\1\METHODS\SCOTT\_C.M  
Last changed : 11/6/2008 11:01:55 AM by Karen  
(modified after loading)

Zorbax C18 SB column, 3.5u, 4.6 x 150mm, mp=20/80/0.25, MeCN:HOH:HAc (pH2.8); scan 150-550; flow 0.5mL/min; vcap 2500; frag 100; col temp 45

Current Chromatogram(s)

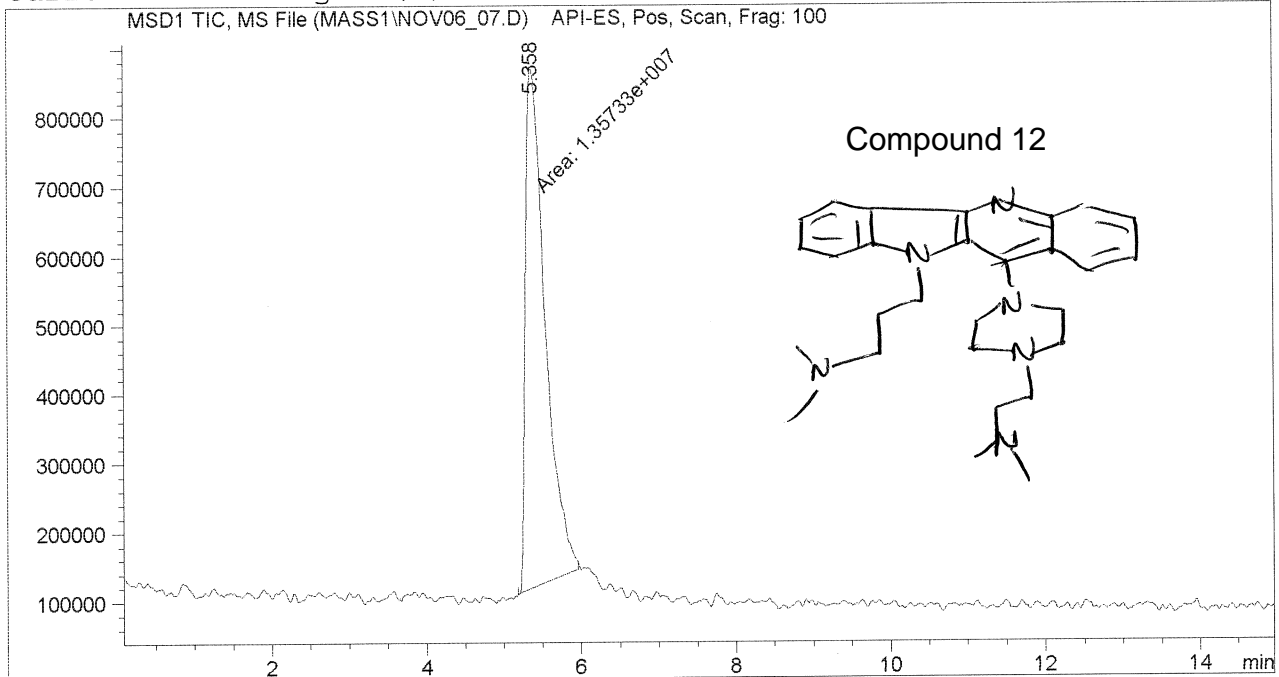

MS Spectrum

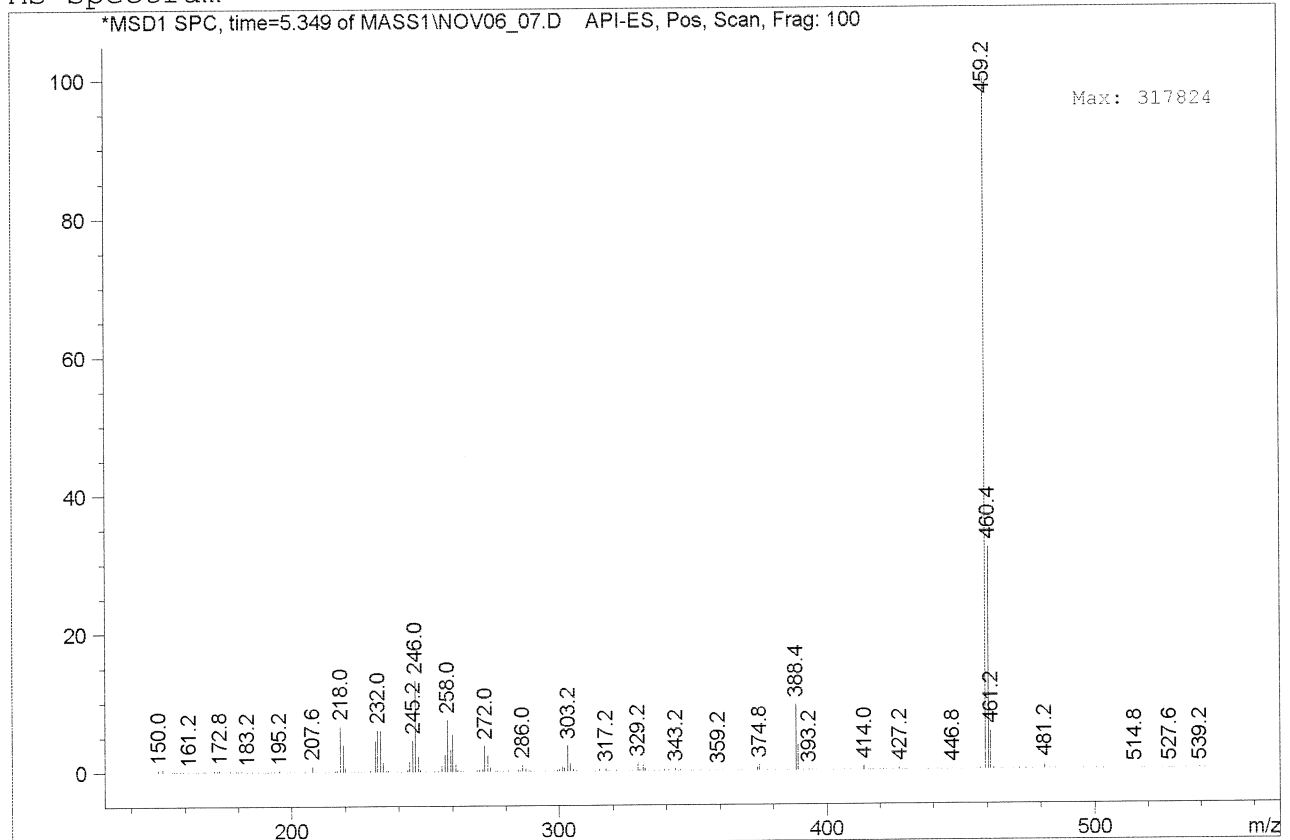

# Generic Display Report

**Analysis Info**  
 Analysis Name  
 Method  
 Sample Name  
 Comment

D:\DATA\Facility\_Dec-08\VB-GSA-118\_000004.d  
 ESI\_101506  
 VB-GSA-118  
 Venkat B., MeOH:ACN 1:1

Acquisition Date 12/19/2008 11:43:44 AM  
 Operator  
 Instrument apex-Qe

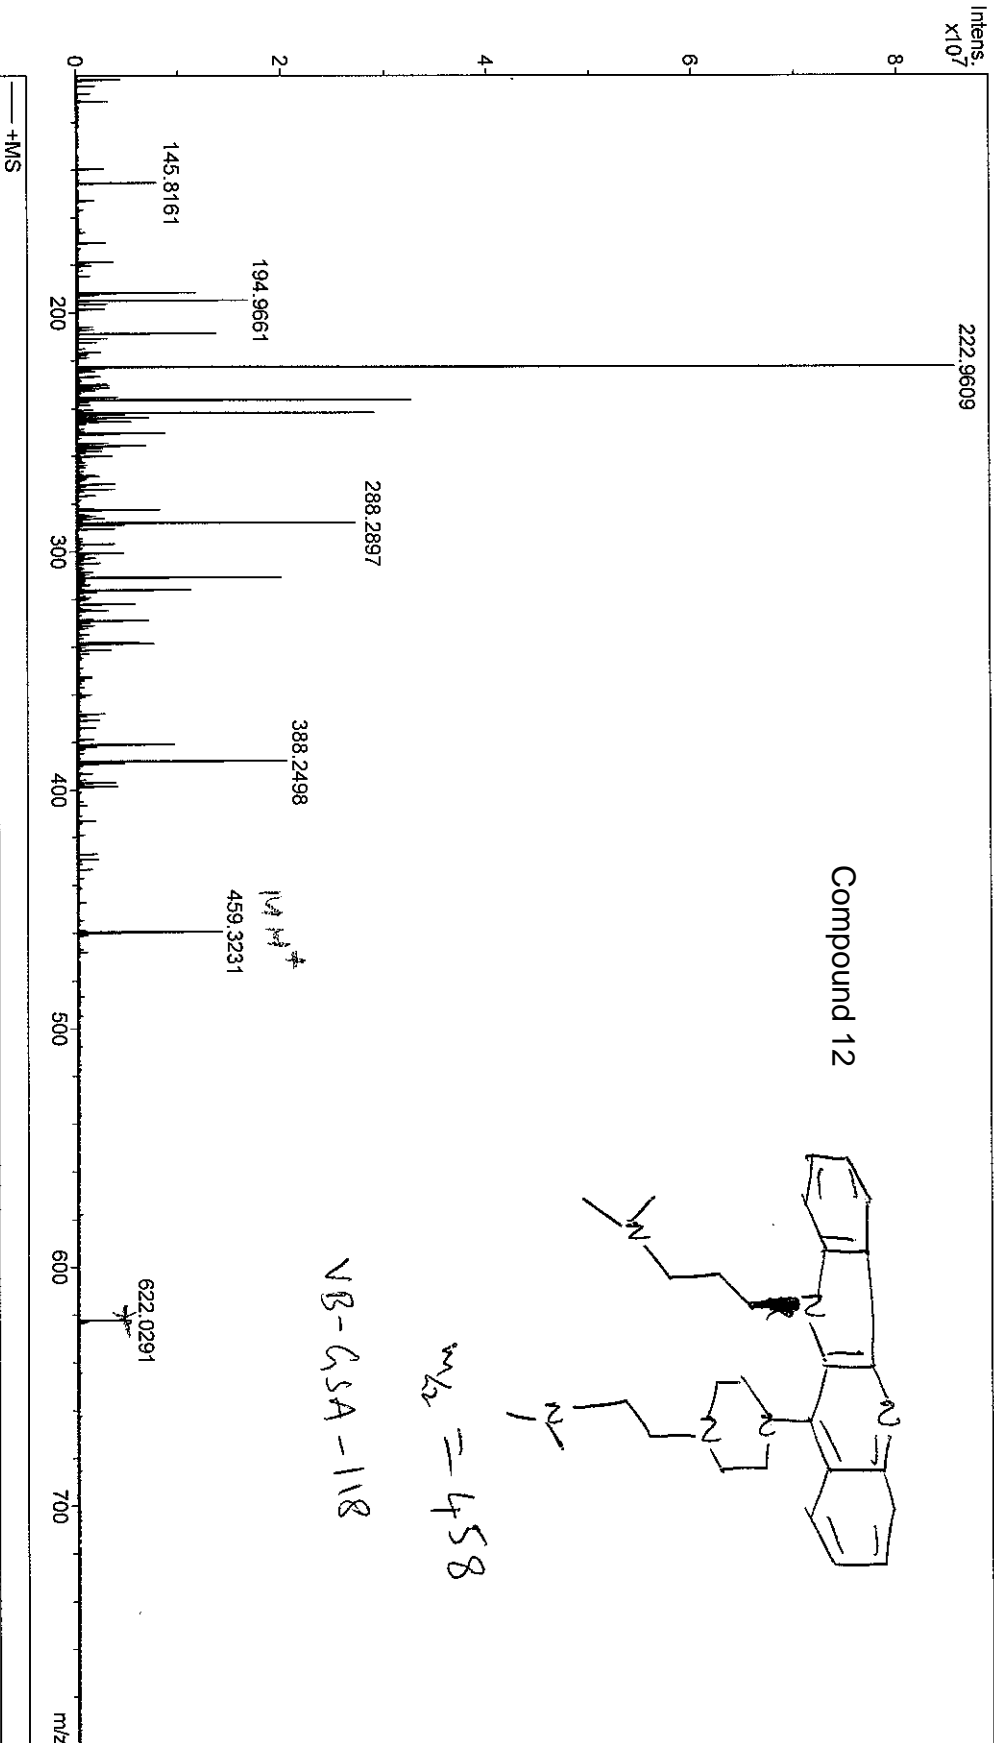

\* std

# Generic Display Report

**Analysis Info**  
Analysis Name  
Method  
Sample Name  
Comment

D:\DATA\Facility\_Dec-08\VB-GSA-118-QCID\_000001.d  
ESI\_101506  
VB-GSA-118  
Venkat B., MeOH:ACN 1:1

Acquisition Date 12/19/2008 11:20:30 AM  
Operator  
Instrument apex-Qe

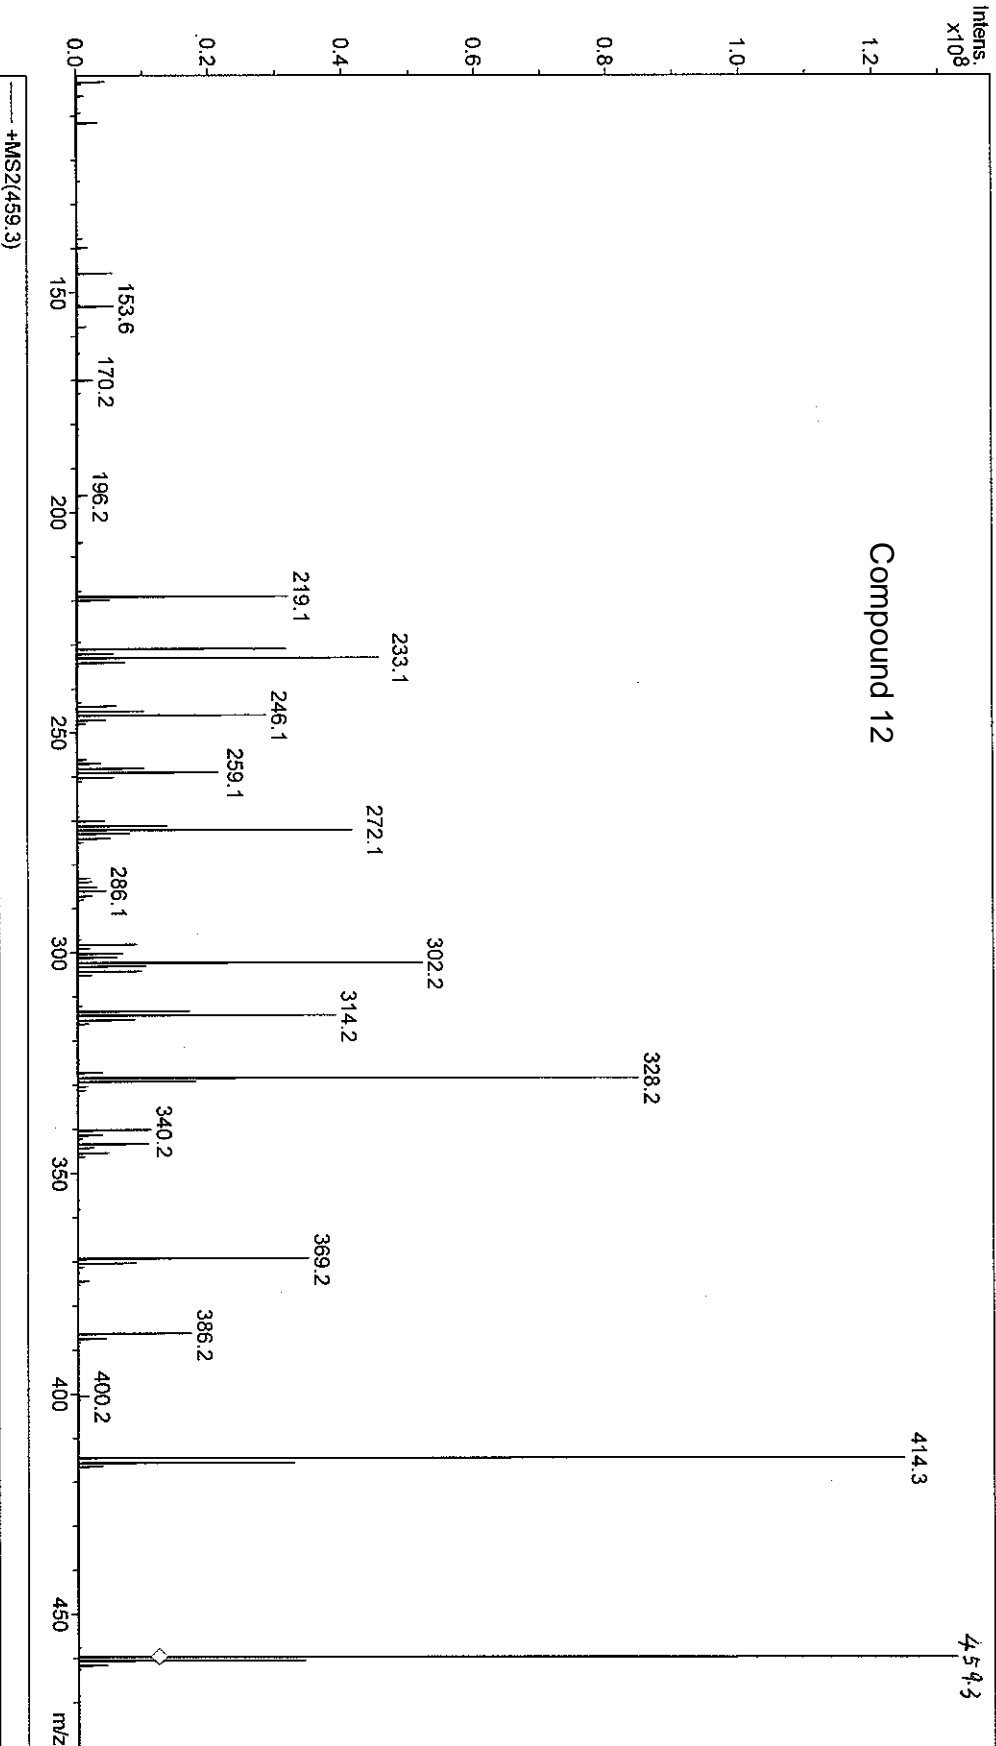

# Generic Display Report

**Analysis Info**  
Analysis Name: D:\DATA\Facility\_Dec-08\VB-GSA-118\_000004.d  
Method: ESL\_101506  
Sample Name: VB-GSA-118  
Comment: Venkat B., MeOH:ACN 1:1

Acquisition Date: 12/19/2008 11:43:44 AM  
Operator:  
Instrument: apex-Qe

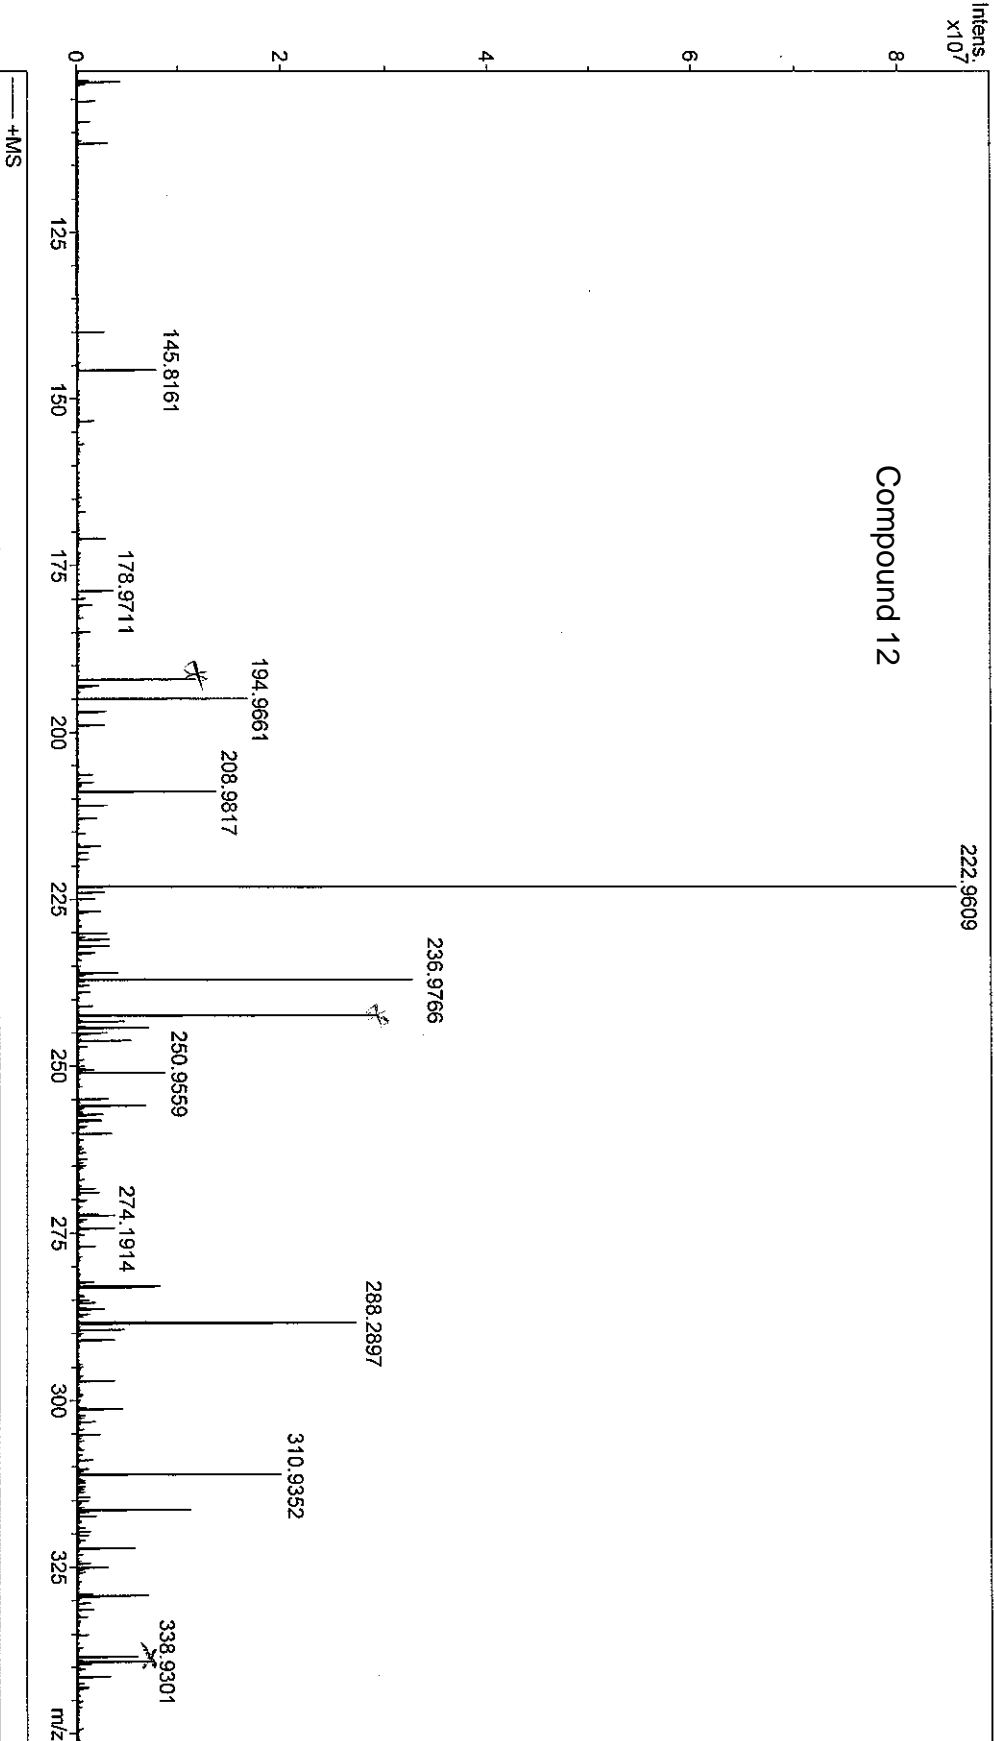

X in background

# Generic Display Report

## Analysis Info

Analysis Name D:\DATA\Facility\_Dec-08\VB-GSA-118\_000004.d  
Method ESL\_101506  
Sample Name VB-GSA-118  
Comment Venkat B., MeOH:ACN 1:1

## Acquisition Date

12/19/2008 11:43:44 AM

## Operator

Instrument

apex-Qe

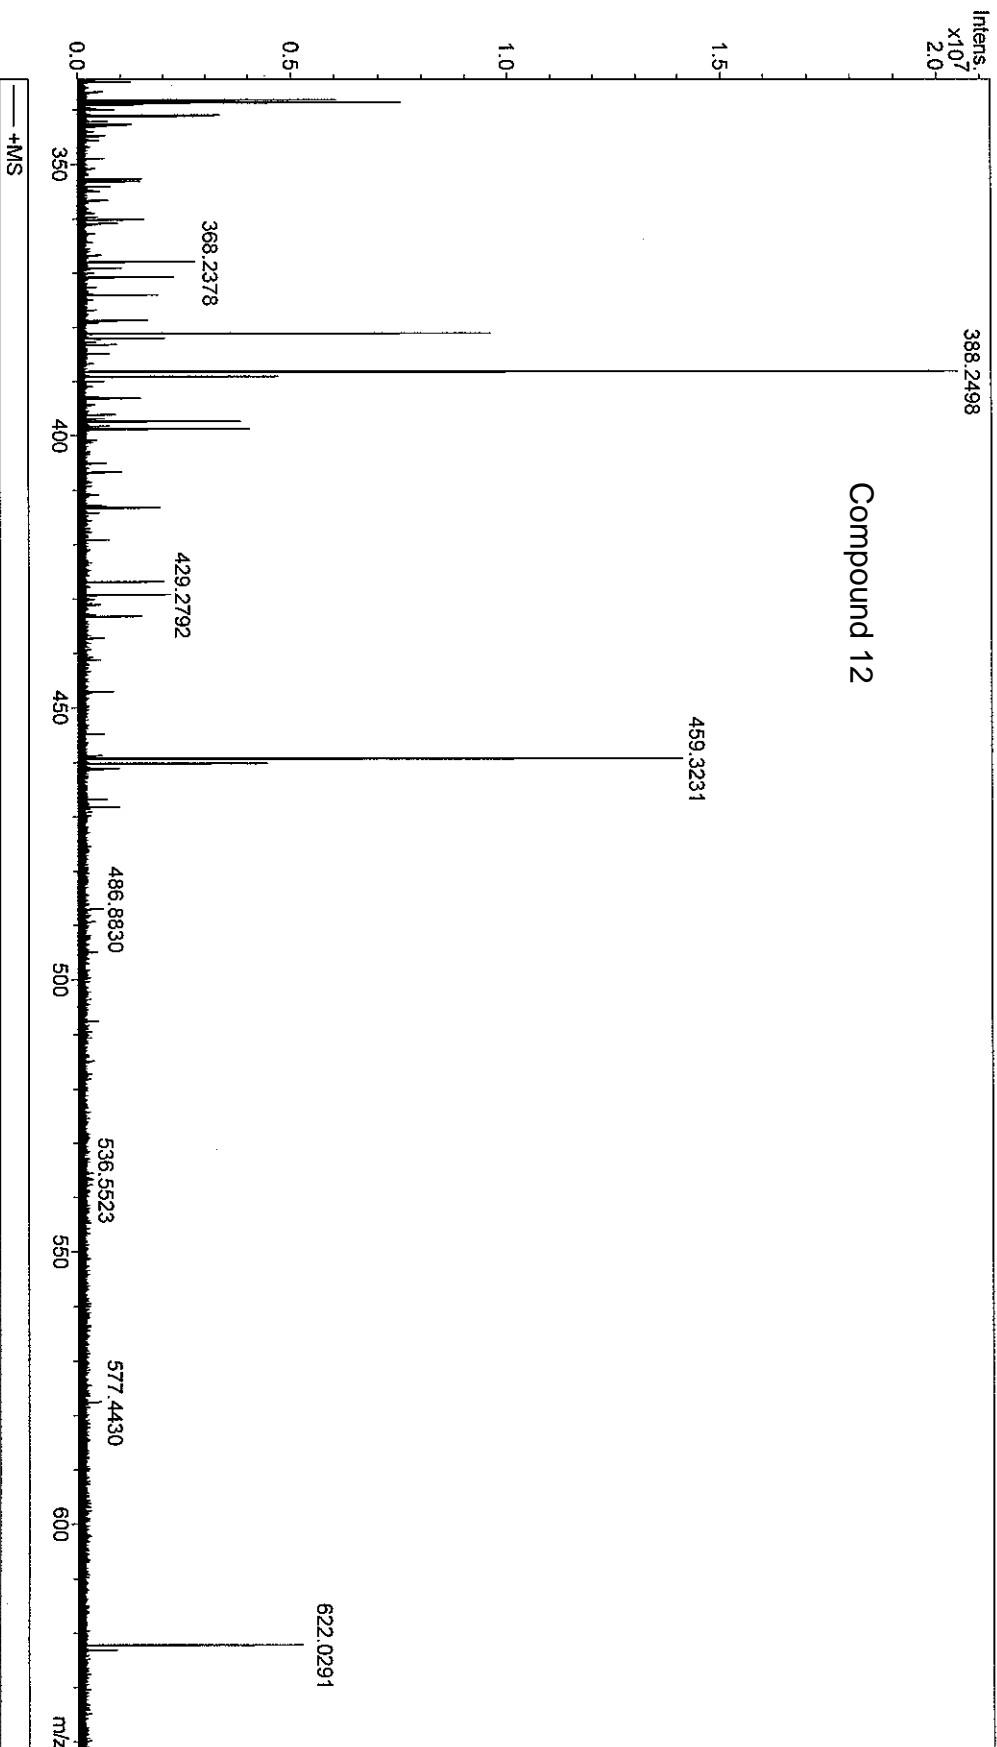

# Generic Display Report

**Analysis Info**  
Analysis Name D:\DATA\Facility\_Dec-08\VB-GSA-118\_000004.d  
Method ESL\_101506  
Sample Name VB-GSA-118  
Comment Venkat B., MeOH:ACN 1:1

Acquisition Date 12/19/2008 11:43:44 AM  
Operator  
Instrument apex-Qe

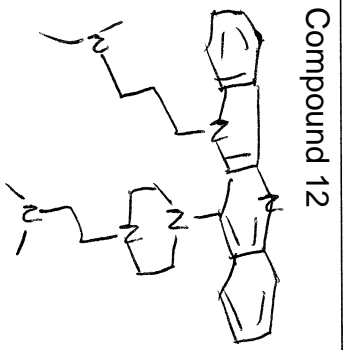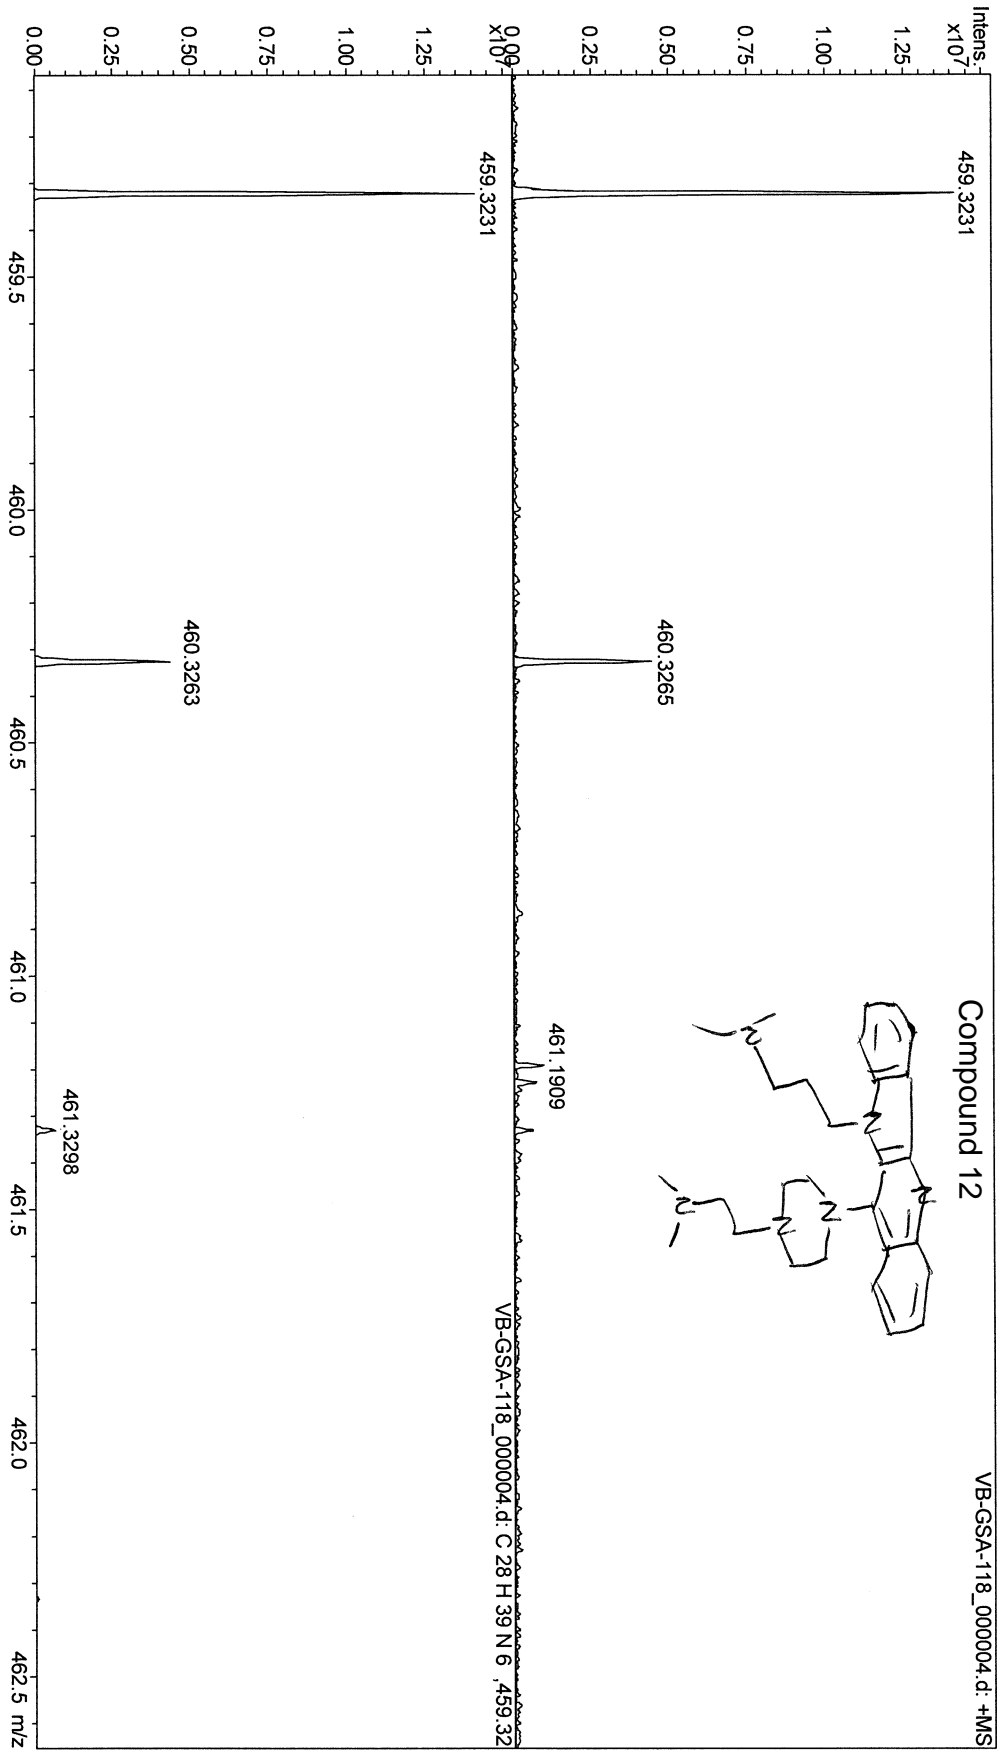

SmartFormula Manually

Min

Max

Note: for m < 2000 the elements C, H, N, and O are considered implicitly.

Measured m/z  Tolerance  mDa  Charge

| # | Mol. Formula | m/z      | err [mDa] | err  [ppm] | err [ppm] | mean err [ppm] |
|---|--------------|----------|-----------|------------|-----------|----------------|
| 1 | C28H39N4     | 459.3231 | -0.06     | 0.1        | -0.1      | -0.2           |
| 2 | C27H43N2O4   | 459.3217 | -1.40     | 3.1        | -3.1      | -3.1           |

Automatically locate monoisotopic peak    Maximum number of formulas

Check rings plus double bonds    Minimum  Maximum

Electron configuration

Filter H/C element ratio    Minimum H/C  Maximum H/C

Estimate carbon number     Generate immediately

Compound 12

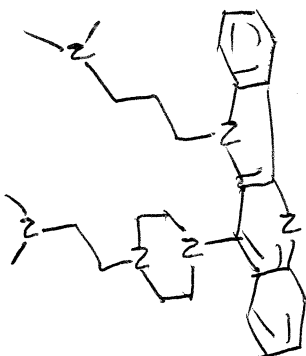



Compound 13

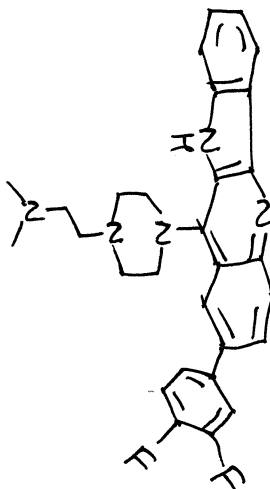

VB-GSA-197 (DMSO-d<sub>6</sub>)

- 8.517
- 8.510
- 8.316
- 8.291
- 8.235
- 8.206
- 7.965
- 7.958
- 7.935
- 7.928
- 7.901
- 7.894
- 7.886
- 7.879
- 7.861
- 7.669
- 7.662
- 7.645
- 7.637
- 7.629
- 7.608
- 7.605
- 7.582
- 7.578
- 7.296
- 7.292
- 7.270
- 7.247
- 7.243
- 3.560
- 3.220
- 2.830
- 2.789
- 2.765
- 2.710
- 2.693
- 2.509
- 2.504
- 2.498
- 2.440
- 0.009
- 0.002
- 0.013

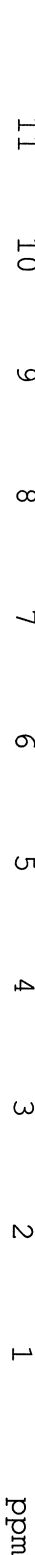

- 1.132
- 1.192
- 1.284
- 1.179
- 2.379
- 4.383
- 1.175
- 4.531
- 8.087
- 6.000

Current Data Parameters  
 NAME VB-GSA-197  
 EXPNO 2  
 PROCNO 1

F2 - Acquisition Parameters  
 Date\_ 20090812  
 Time\_ 15.28  
 INSTRUM spect  
 PROBHD 5 mm QNP  
 PULPROG 1H/1  
 TD 2930  
 FIDRES 65536  
 SOLVENT DMSO  
 NS 64  
 DS 2  
 SWH 6172.839 Hz  
 FIDRES 0.094190 Hz  
 AQ 5.3084660 sec  
 RG 362  
 DW 81.000 usec  
 DE 6.00 usec  
 TE 300.0 K  
 D1 1.00000000 sec

==== CHANNEL f1 =====  
 NUC1 1H  
 P1 9.25 usec  
 PL1 0.00 dB  
 SFO1 300.1318534 MHz  
 F2 - Processing parameters  
 SI 32768  
 SF 300.1300000 MHz  
 WDM EM  
 SSB 0  
 LB 0.30 Hz  
 GB 0  
 PC 1.00

212

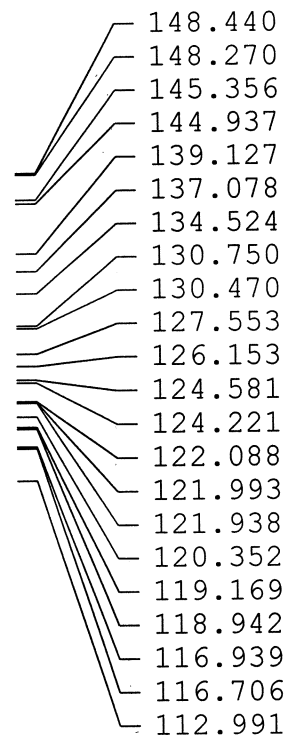

Compound 13

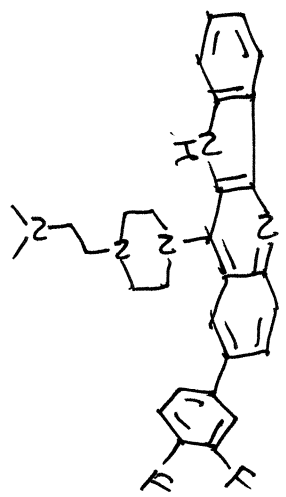

VB-GSA-197

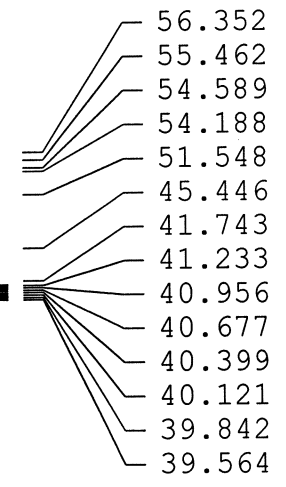

0.962

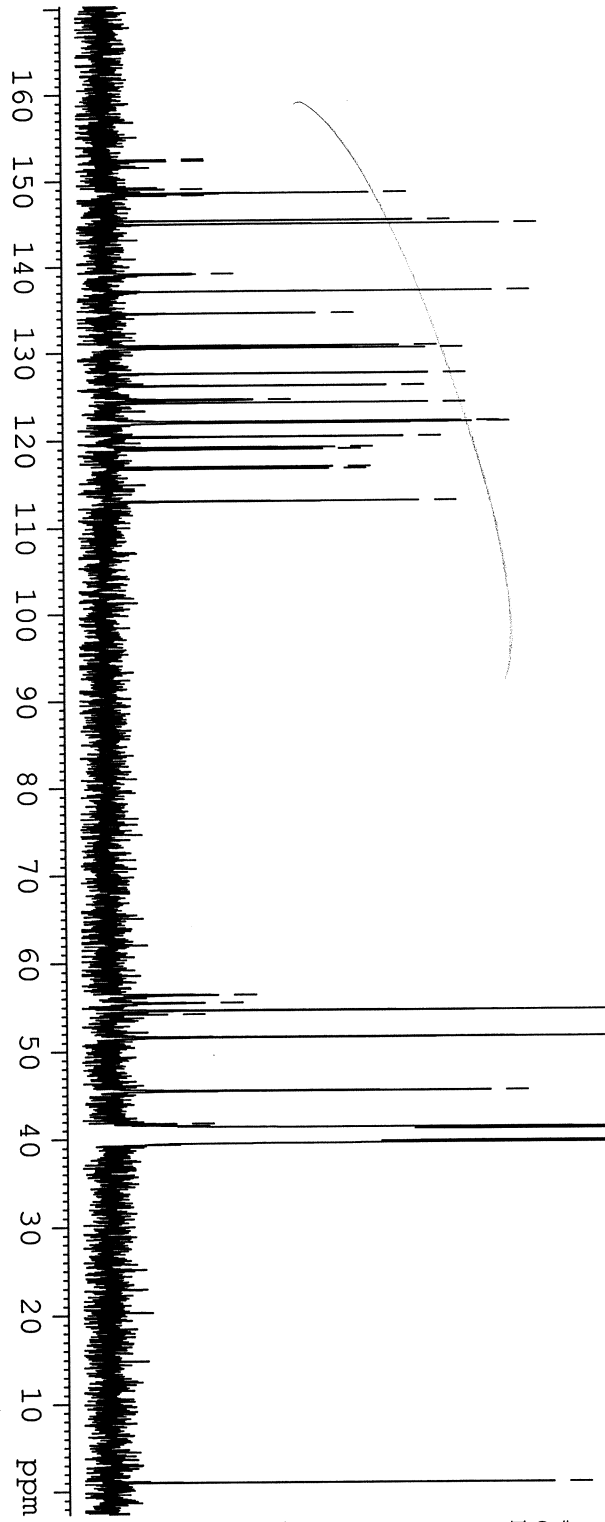

Current Data Parameters  
 NAME VB-GSA-197  
 EXPNO 10  
 PROCNO 1

F2 - Acquisition Parameters  
 Date\_ 20090813  
 Time\_ 8.57

INSTRUM spect  
 PROBHD 5 mm QNP 1H/1  
 PULPROG zgpg30  
 TD 65536  
 SOLVENT DMSO  
 NS 15000  
 DS 4

SWH 17985.611 Hz  
 FIDRES 0.274439 Hz  
 AQ 1.8219508 sec  
 RG 1448.2  
 DW 27.800 usec  
 DE 6.00 usec  
 TE 300.0 K  
 D1 2.00000000 sec  
 d11 0.03000000 sec  
 d12 0.00002000 sec

==== CHANNEL f1 =====  
 NUC1 13C  
 P1 6.00 usec  
 PL1 2.00 dB  
 SFO1 75.4752653 MHz

==== CHANNEL f2 =====  
 CPDPRG2 waltz16  
 NUC2 1H  
 PCPD2 90.00 usec  
 PL2 0.00 dB  
 PL12 20.00 dB  
 PL13 20.00 dB  
 SFO2 300.1312005 MHz

F2 - Processing parameters  
 SI 32768  
 SF 75.4677190 MHz  
 WDW EM  
 SSB 0  
 LB 1.00 Hz  
 GB 0  
 PC 1.40

=====  
Injection Date : 8/13/2009 6:21:56 PM  
Sample Name : VB-GSA-197 Location : Vial 5  
Acq. Operator : Karen Inj : 1  
Acq. Instrument : Instrument 1 Inj Volume : 0.1 µl  
Method : C:\HPCHEM\1\METHODS\LC\_MS.M  
Last changed : 8/13/2009 6:37:01 PM by Karen  
(modified after loading)

Zorbax SB ODS, 60:40:0.25; MeOH/water/formicA, POS, 300-550; frag 50; 30C, cap volt 3000, gas temp 350

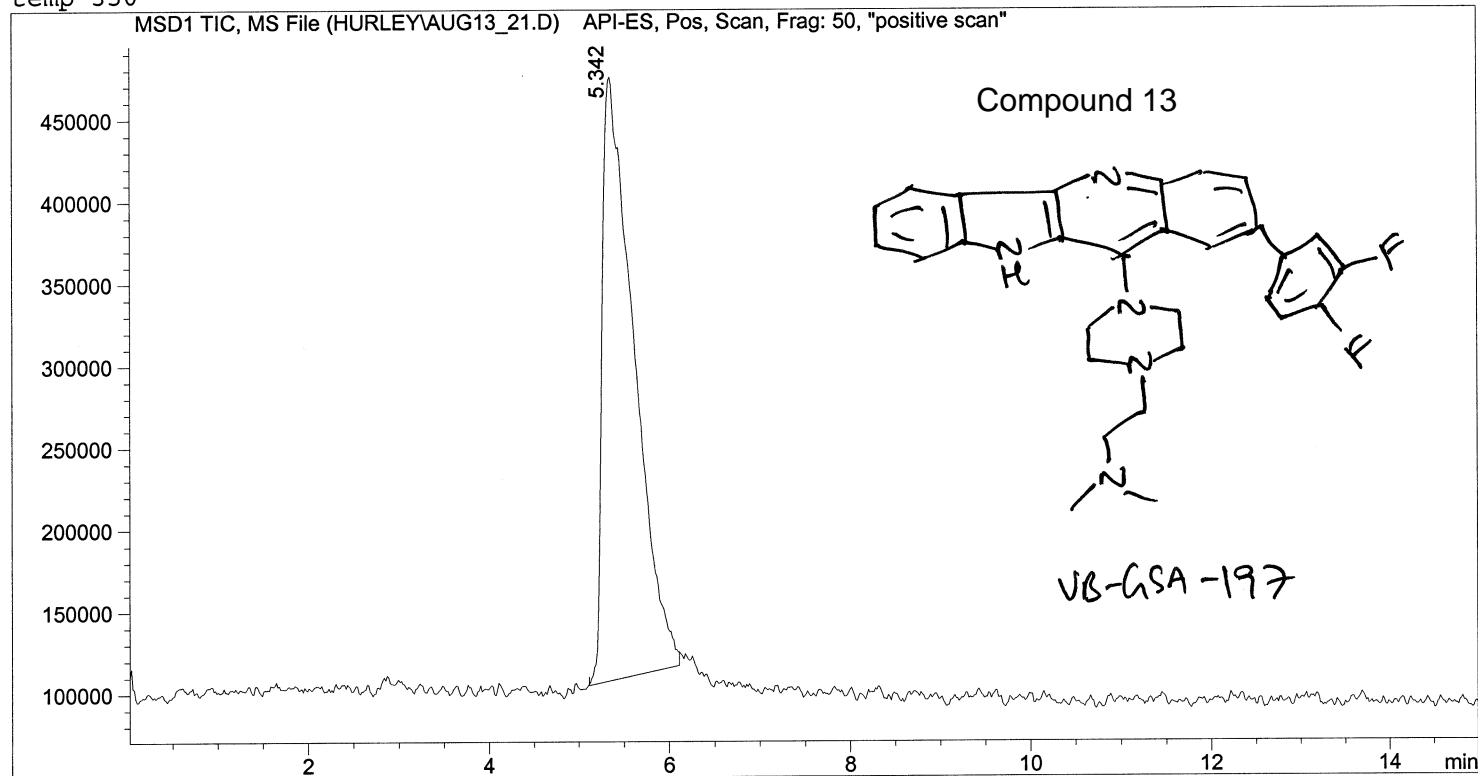

=====  
Area Percent Report  
=====

Sorted By : Signal  
Multiplier : 1.0000  
Dilution : 1.0000  
Use Multiplier & Dilution Factor with ISTDs

Signal 1: MSD1 TIC, MS File

| Peak # | RetTime [min] | Type | Width [min] | Area      | Height    | Area %   |
|--------|---------------|------|-------------|-----------|-----------|----------|
| 1      | 5.342         | BB   | 0.3207      | 8.93619e6 | 3.68294e5 | 100.0000 |

Totals : 8.93619e6 3.68294e5

=====  
\*\*\* End of Report \*\*\*

Injection Date : 8/13/2009 6:21:56 PM  
Sample Name : VB-GSA-197 Location : Vial 5  
Acq. Operator : Karen Inj : 1  
Acq. Instrument : Instrument 1 Inj Volume : 0.1 µl  
Method : C:\HPCHEM\1\METHODS\LC\_MS.M  
Last changed : 8/13/2009 6:37:01 PM by Karen  
(modified after loading)

Zorbax SB ODS, 60:40:0.25; MeOH/water/formicA, POS, 300-550; frag 50; 30C, cap volt 3000, gas temp 350

Current Chromatogram(s)

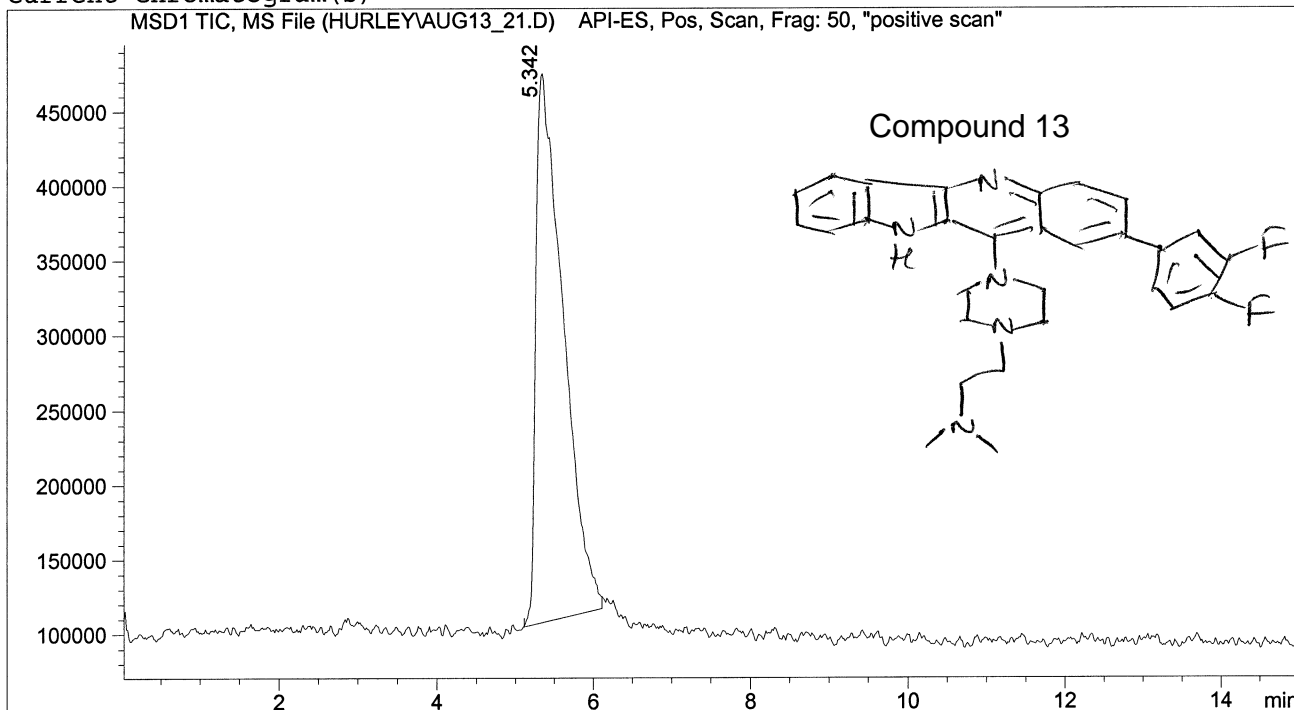

Apex Mass Spectrum of Peak 5.342 of AUG13 21.D

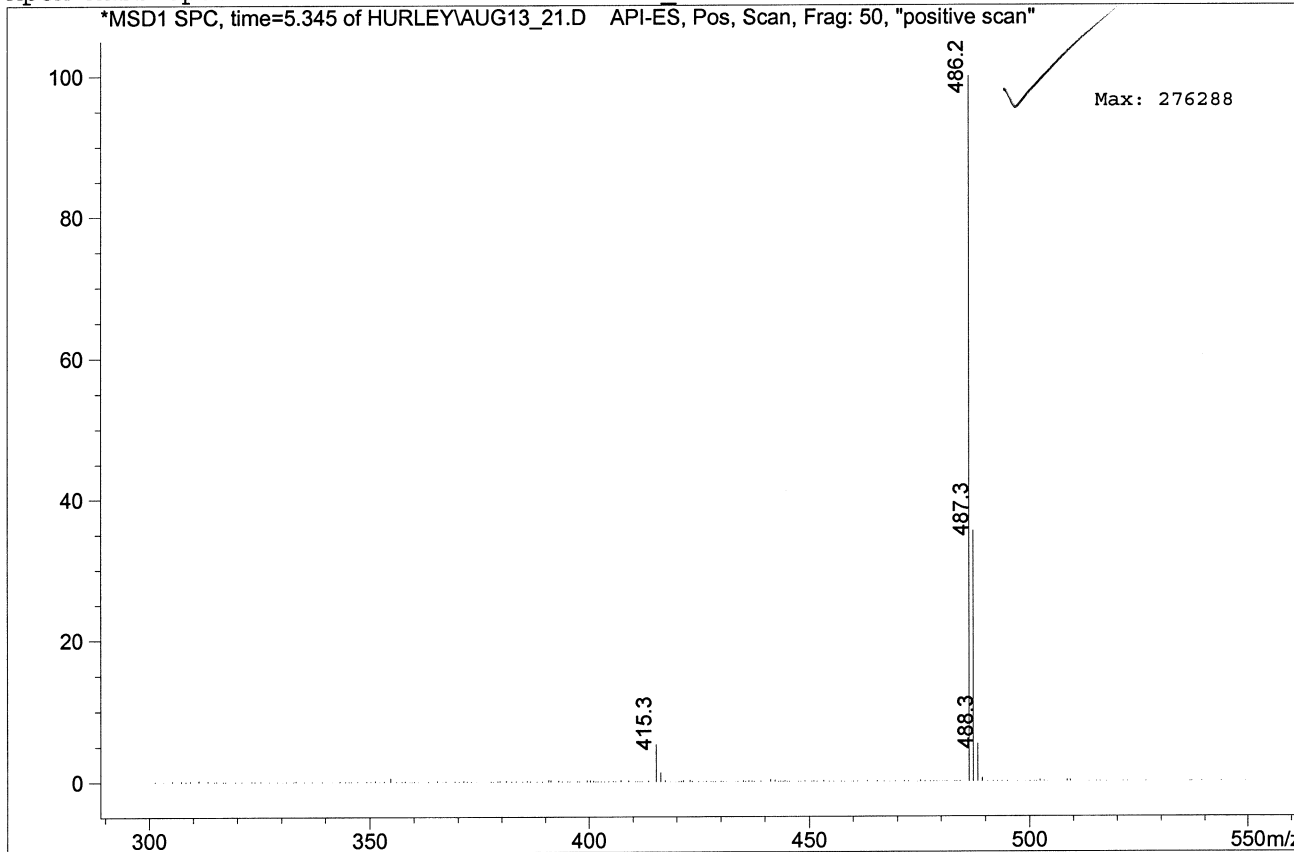

486.3  
MH+

Compound 13

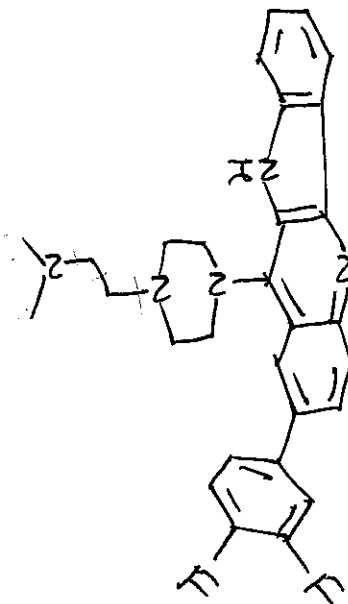

VB-GSA-197

$M_n = 485$

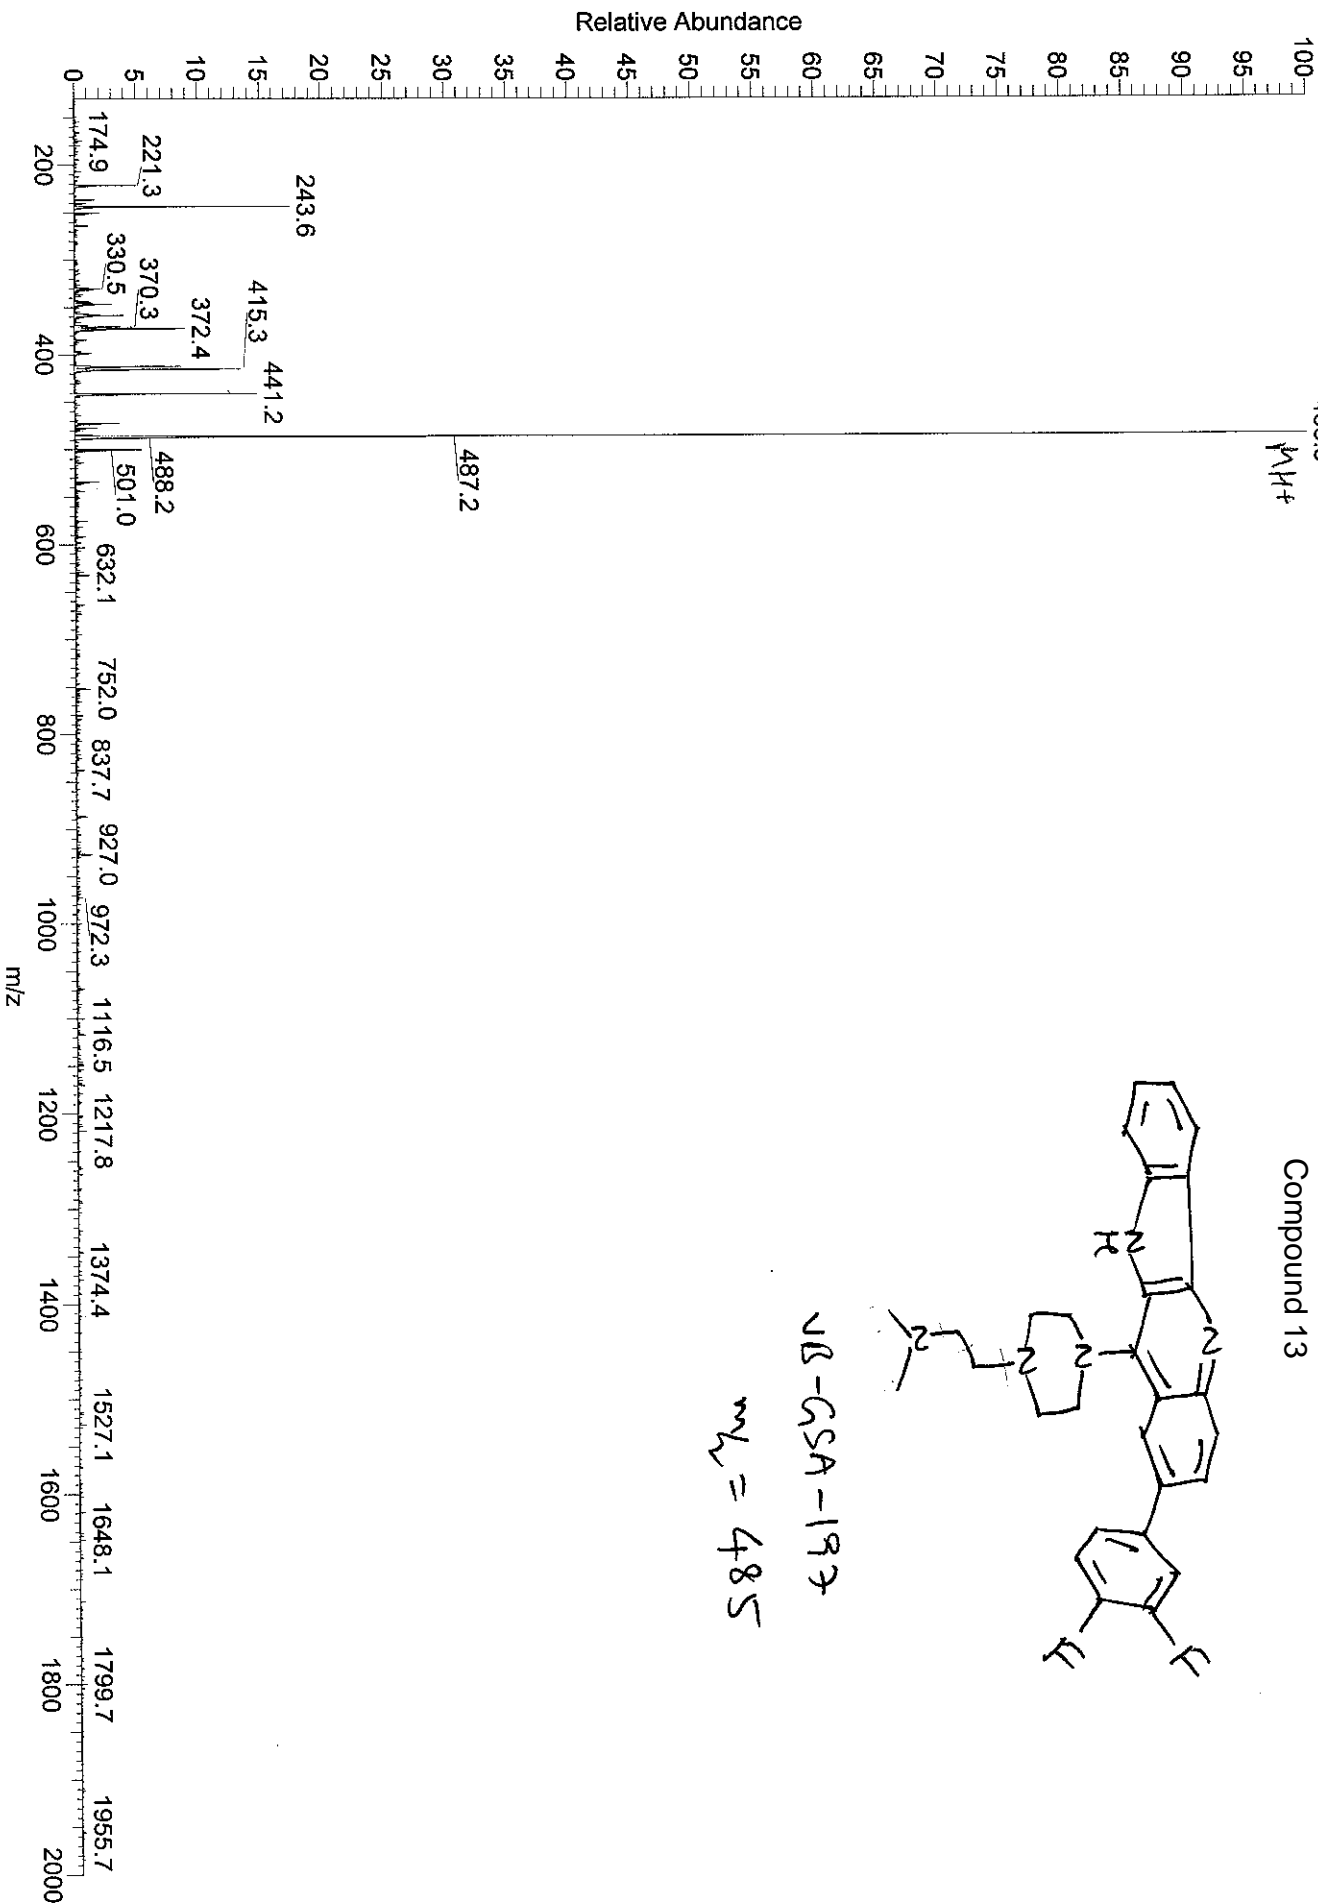

VB\_GSA\_197 #31-35 RT: 1.03-1.15 AV: 5 NL: 1.72E7  
T: + p Full ms [130.00-2000.00]

Compound 13

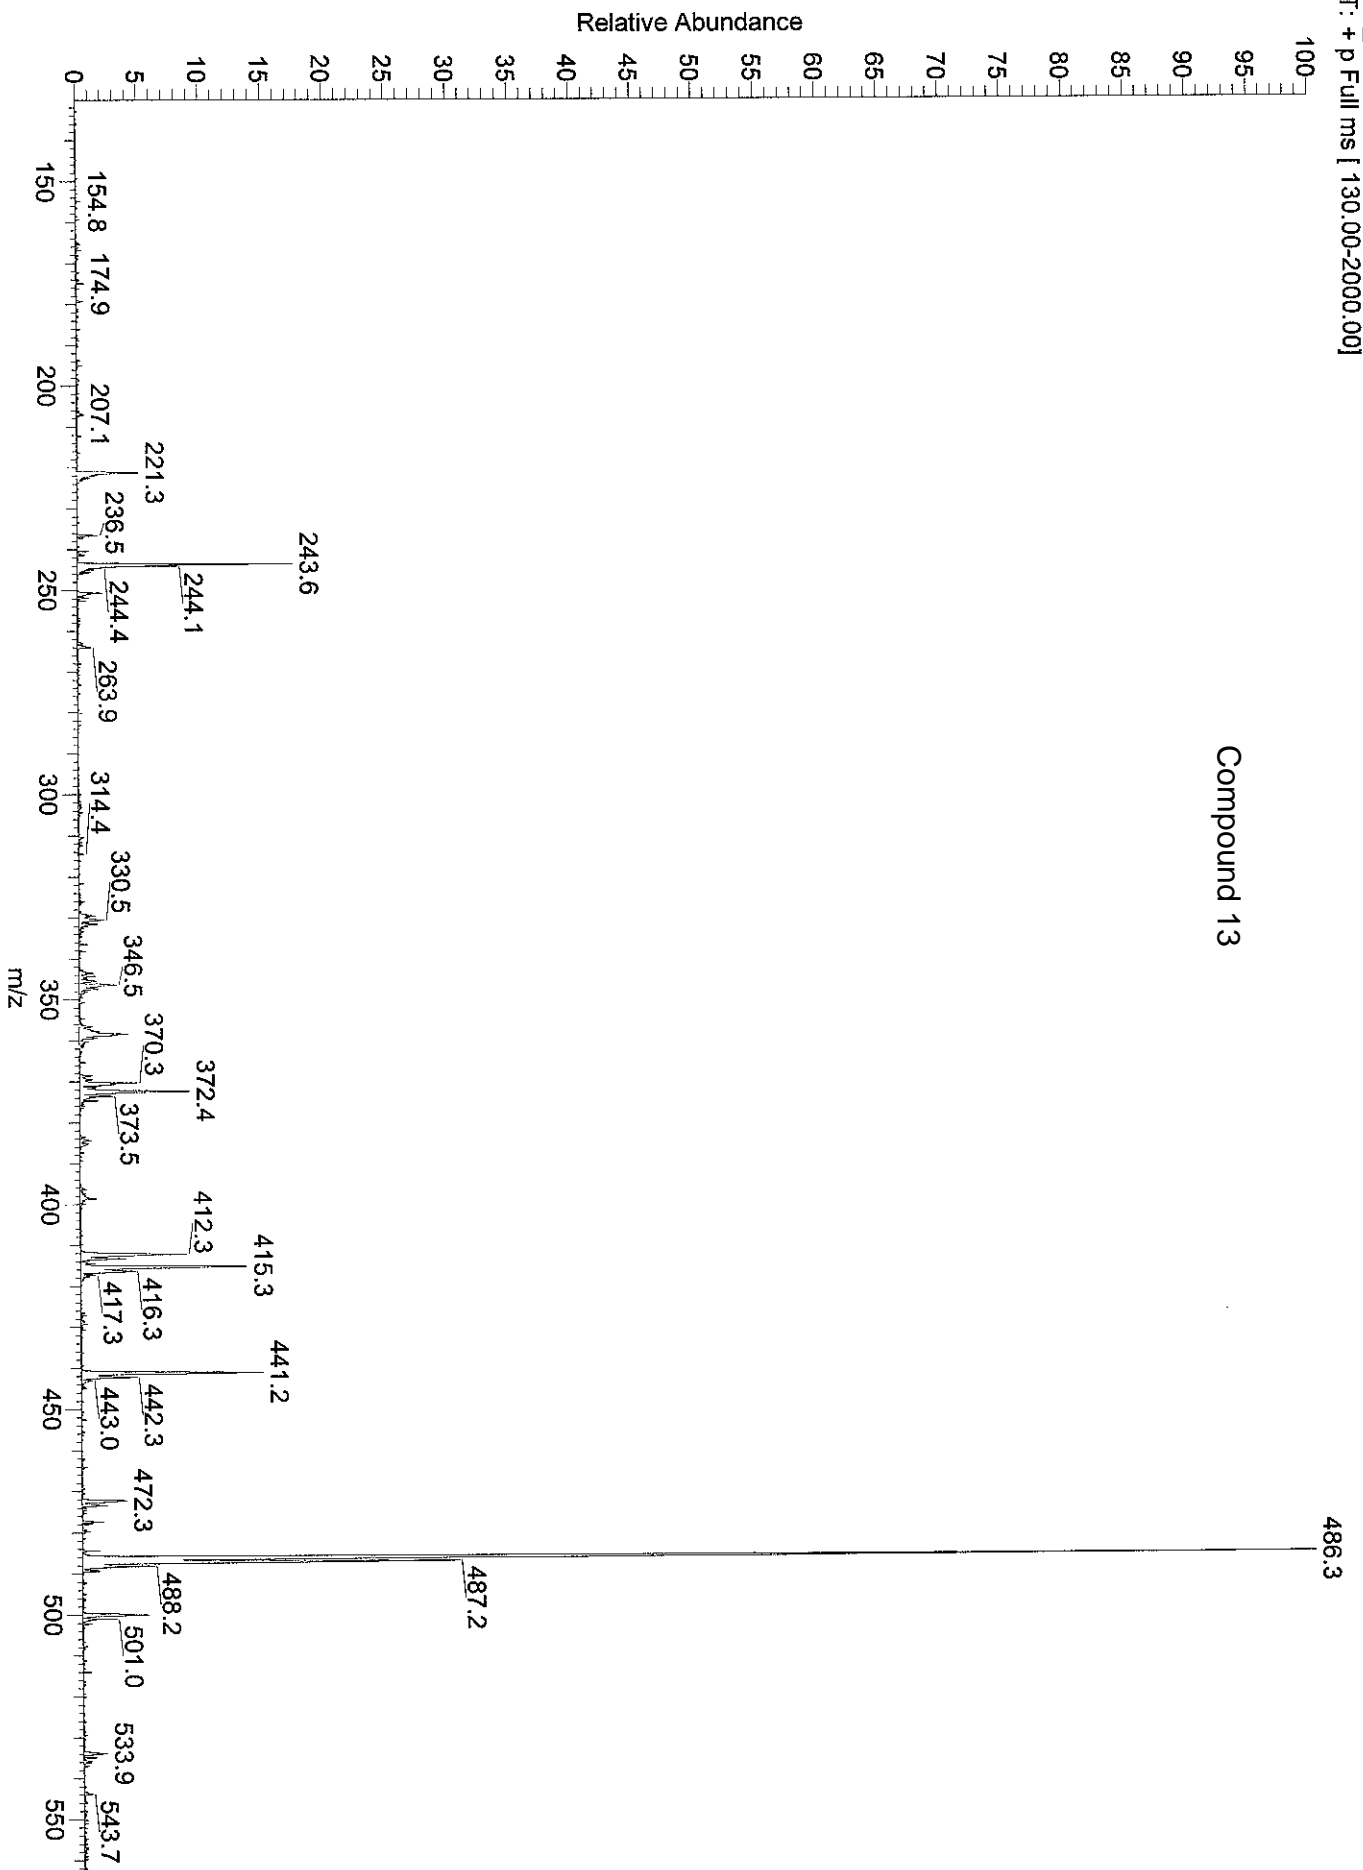

E:\MSLab LC\VB\_GSA\_197  
V. Boddupally, MeOH:ACN 1:1  
VB\_GSA\_197 #25-29 RT: 0.82-0.96 AV: 5 NL: 9.06E6  
T: + p Full ms2 486.30@30.00 [130.00-2000.00]

08/17/2009 03:36:05 PM

VB\_GSA\_197

Compound 13

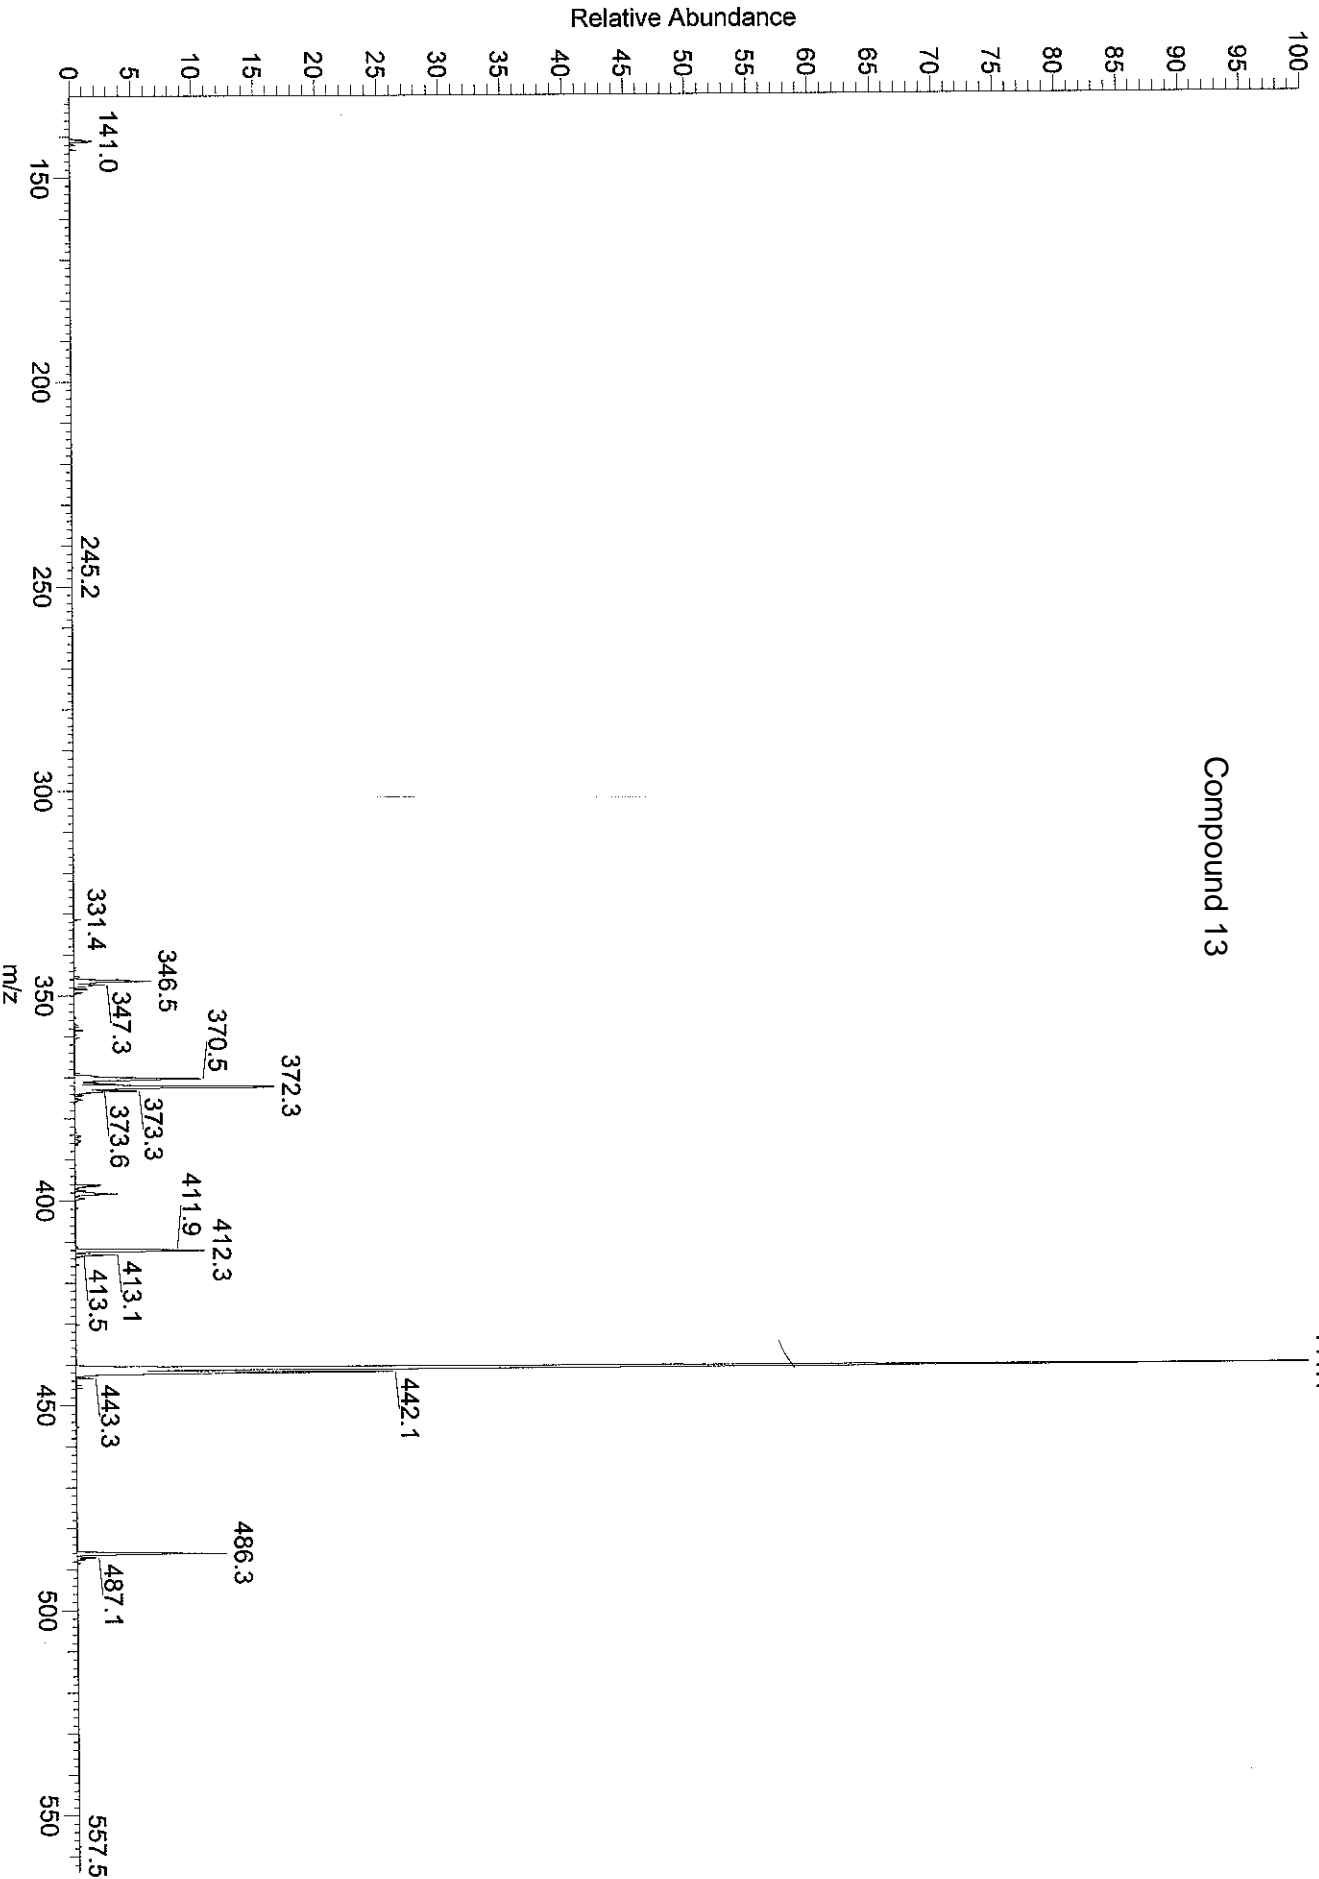

## Generic Display Report

## Analysis Info

Analysis Name D:\DATA\Facility\_August\_09\VB\_GSA\_197\_000001.d  
Method ESI\_101506  
Sample Name VB\_GSA\_197  
Comment VB\_GSA\_197  
ACN:H2O 1:1 0.1% FA

Acquisition Date 8/21/2009 5:04:25 PM

Operator  
Instrument apex-Qe

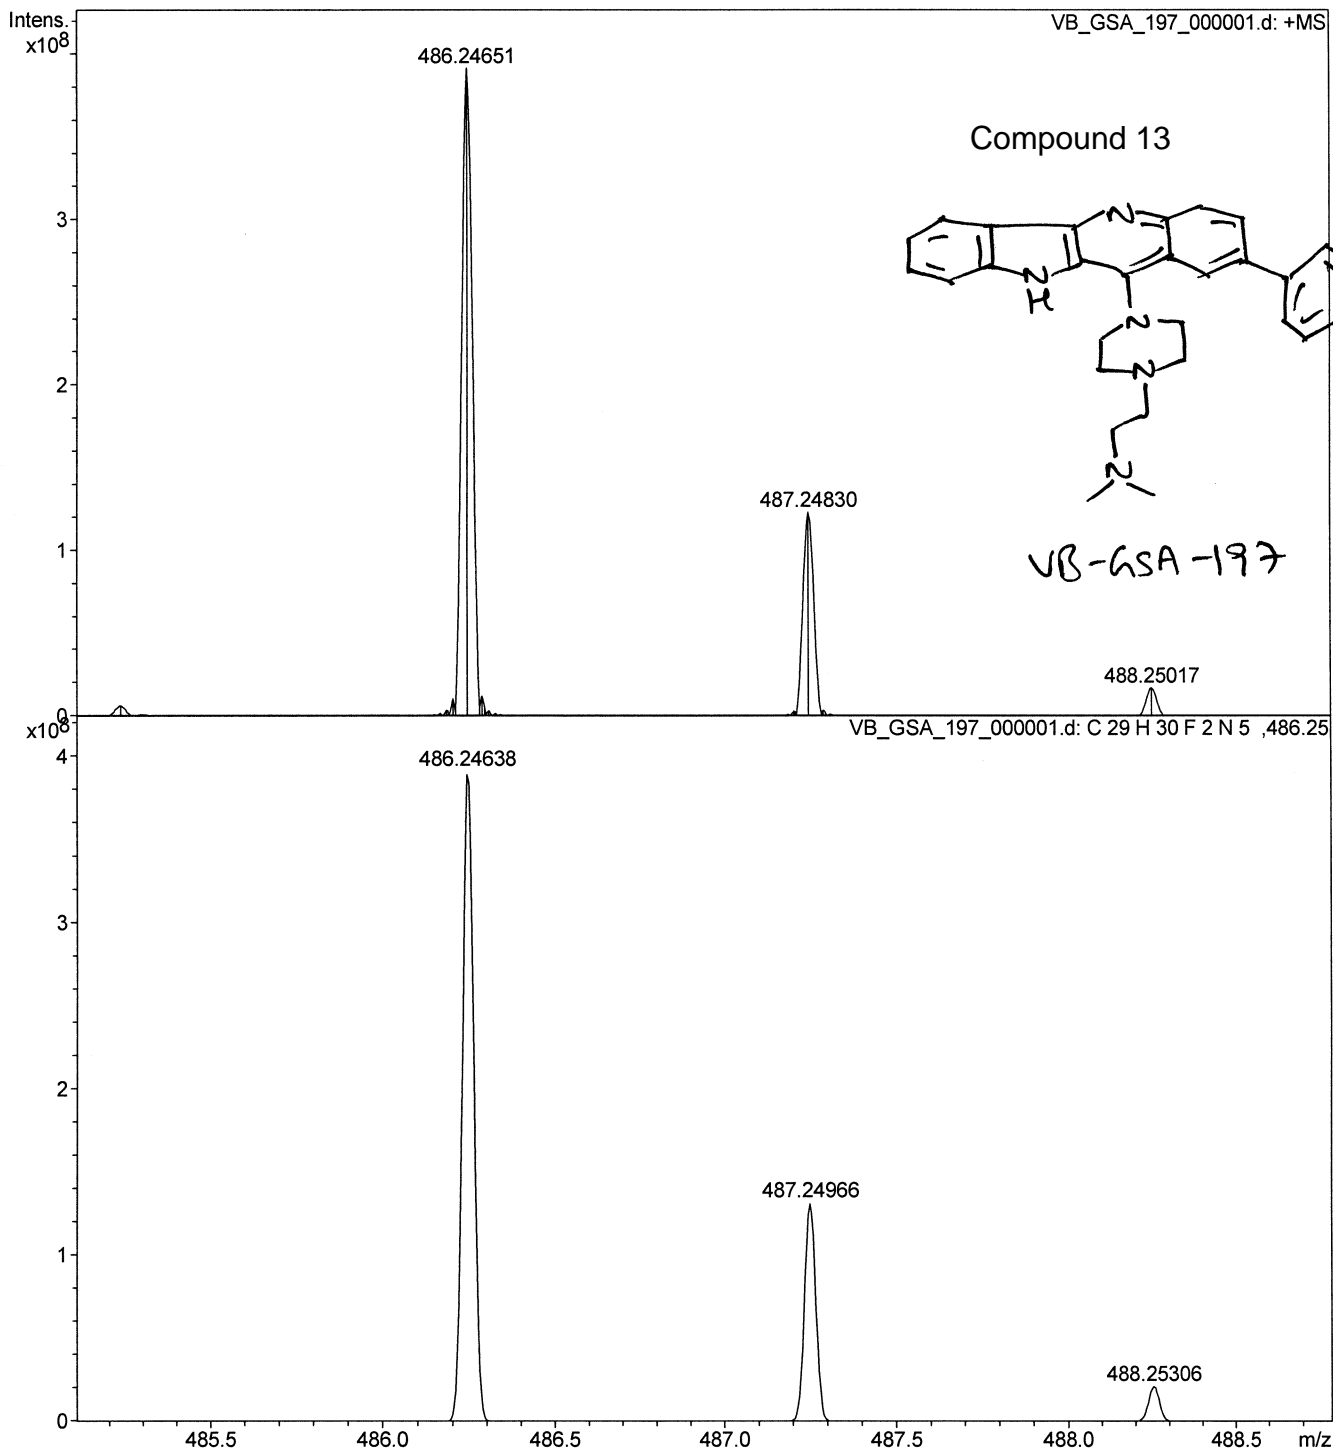



## SmartFormula Manually

|     |                                      |          |
|-----|--------------------------------------|----------|
| Min | C <sub>22</sub> F <sub>2</sub>       | Generate |
| Max | F <sub>3</sub>                       |          |
|     | C <sub>22-n</sub> , F <sub>2-3</sub> | Help     |

Note: for m < 2000 the elements C, H, N, and O are considered implicitly.

Measured m/z  Tolerance  mDa  Charge

| # | Mol. Formula                                                                 | m/z       | err [mDa] | err [ppm] | err [ppm] | mean err [ppm] | mSigma | Sigma Rank | rdb  | N rule | e <sup>-</sup> |
|---|------------------------------------------------------------------------------|-----------|-----------|-----------|-----------|----------------|--------|------------|------|--------|----------------|
| 1 | C <sub>24</sub> H <sub>33</sub> F <sub>3</sub> N <sub>3</sub> O <sub>4</sub> | 484.24177 | 1.17      | 2.4       | 2.4       | 5.3            | 791.4  | 7          | 8.5  | ok     | even           |
| 2 | C <sub>25</sub> H <sub>35</sub> F <sub>3</sub> N <sub>3</sub> O <sub>5</sub> | 486.24618 | -0.32     | 0.7       | -0.7      | 0.3            | 21.0   | 4          | 7.5  | ok     | even           |
| 3 | C <sub>26</sub> H <sub>31</sub> F <sub>3</sub> N <sub>5</sub> O              | 486.24752 | 1.01      | 2.1       | 2.1       | 3.0            | 6.4    | 2          | 12.5 | ok     | even           |
| 4 | C <sub>27</sub> H <sub>32</sub> F <sub>2</sub> N <sub>3</sub> O <sub>3</sub> | 484.24062 | 0.19      | 0.4       | 0.4       | 3.4            | 703.2  | 6          | 12.5 | ok     | even           |
| 5 | C <sub>28</sub> H <sub>34</sub> F <sub>2</sub> N <sub>3</sub> O <sub>4</sub> | 486.24504 | -1.47     | 3.0       | -3.0      | -2.1           | 6.2    | 1          | 11.5 | ok     | even           |
| 6 | C <sub>29</sub> H <sub>30</sub> F <sub>2</sub> N <sub>5</sub>                | 486.24638 | -0.13     | 0.3       | -0.3      | 0.6            | 10.2   | 3          | 16.5 | ok     | even           |
| 7 | C <sub>33</sub> H <sub>32</sub> F <sub>3</sub>                               | 485.24506 | 1.94      | 4.0       | 4.0       | 5.1            | 600.4  | 5          | 16.5 | ok     | even           |

Compound 13

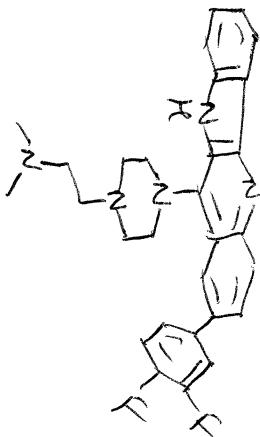

|                                                                            |                                                          |                                   |
|----------------------------------------------------------------------------|----------------------------------------------------------|-----------------------------------|
| <input checked="" type="checkbox"/> Automatically locate monoisotopic peak | Maximum number of formulas                               | <input type="text" value="500"/>  |
| <input checked="" type="checkbox"/> Check rings plus double bonds          | Minimum                                                  | <input type="text" value="-0.5"/> |
|                                                                            | Maximum                                                  | <input type="text" value="40"/>   |
|                                                                            | Electron configuration                                   | <input type="text" value="even"/> |
| <input checked="" type="checkbox"/> Filter H/C element ratio               | Minimum H/C                                              | <input type="text" value="0"/>    |
|                                                                            | Maximum H/C                                              | <input type="text" value="3"/>    |
| <input checked="" type="checkbox"/> Estimate carbon number                 | <input checked="" type="checkbox"/> Generate immediately |                                   |

Show Pattern

Compound 14

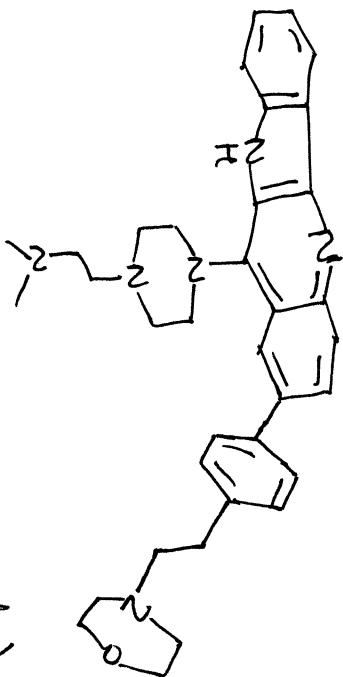

VB-GSA-198 (DMSO-d<sub>6</sub>)

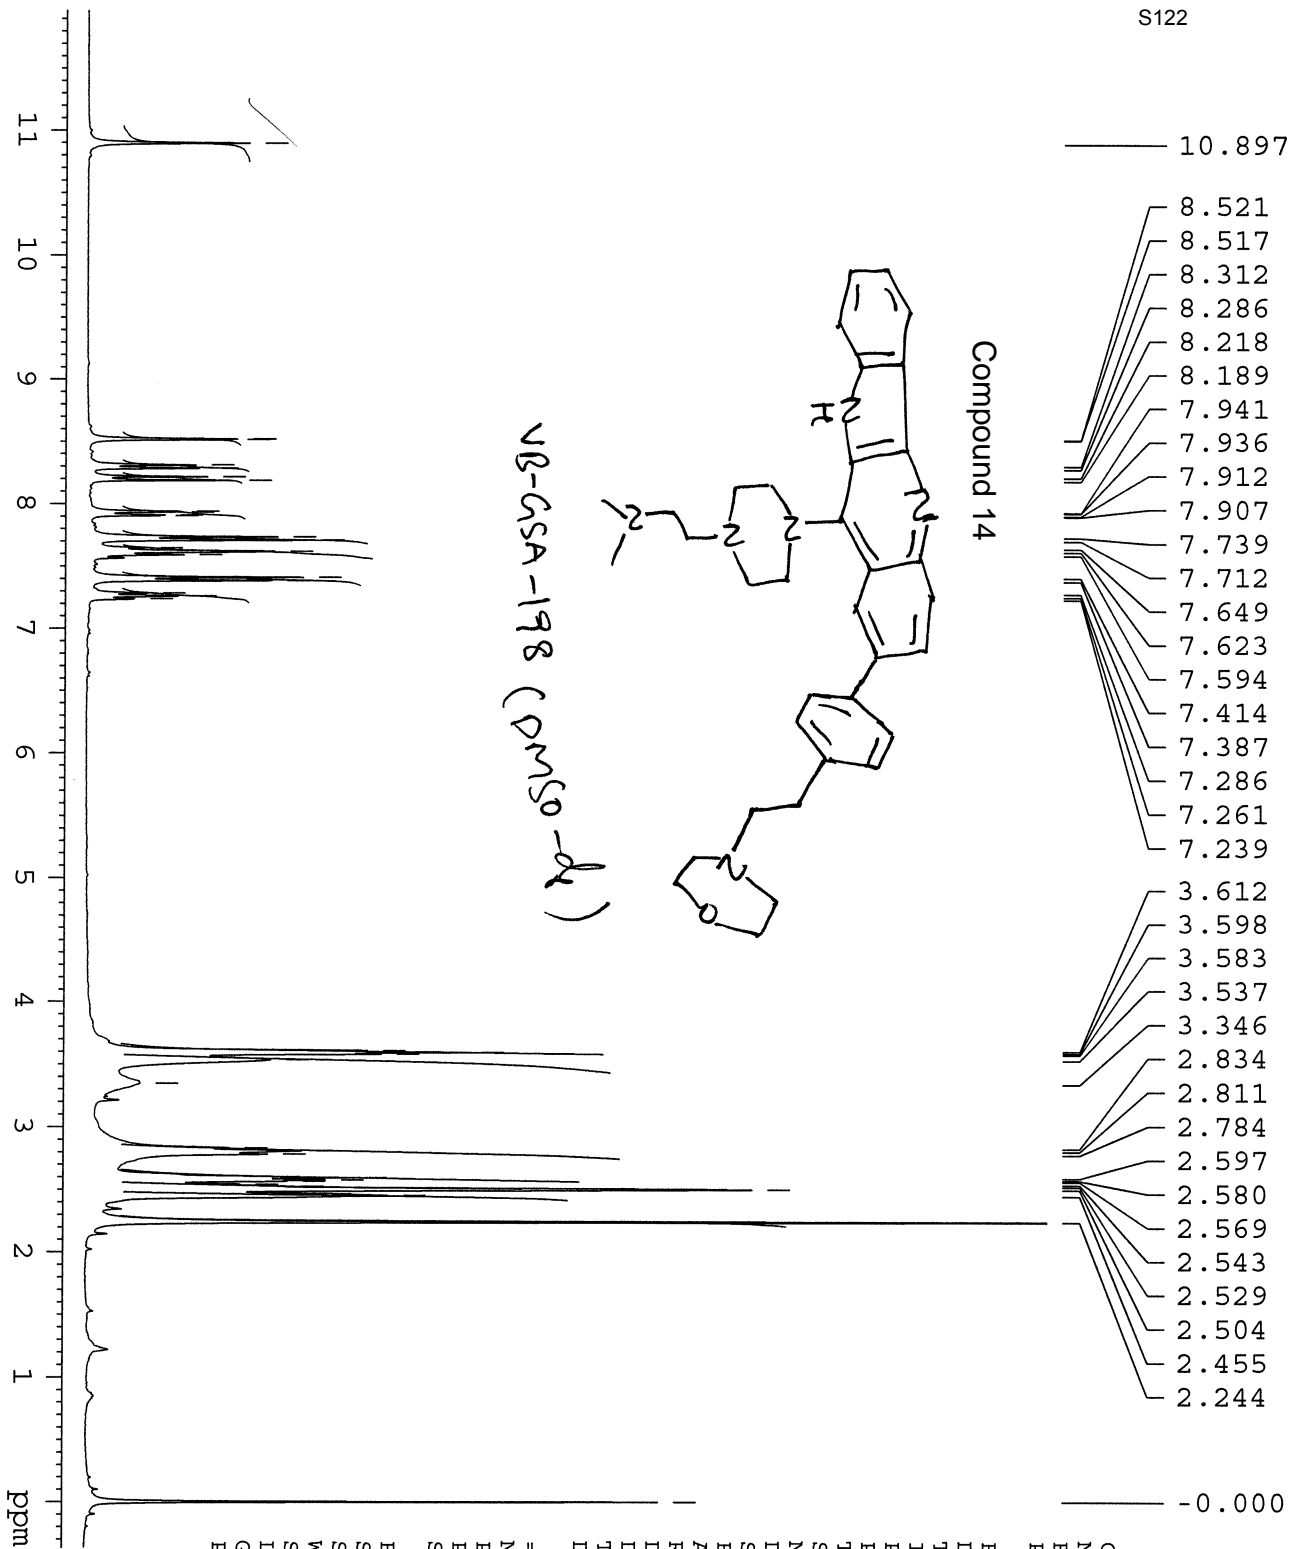

- 1.132
- 1.063
- 1.143
- 1.076
- 1.106
- 2.213
- 2.258
- 2.147
- 1.141
- 4.488
- 4.425
- 4.527
- 4.232
- 4.000
- 4.052
- 6.012

- 10.897
- 8.521
- 8.517
- 8.312
- 8.286
- 8.218
- 8.189
- 7.941
- 7.936
- 7.912
- 7.907
- 7.739
- 7.712
- 7.649
- 7.623
- 7.594
- 7.414
- 7.387
- 7.286
- 7.261
- 7.239
- 3.612
- 3.598
- 3.583
- 3.537
- 3.346
- 2.834
- 2.811
- 2.784
- 2.597
- 2.580
- 2.569
- 2.543
- 2.529
- 2.504
- 2.455
- 2.244

Current Data Parameters  
 NAME VB-GSA-198  
 EXPNO 1  
 PROCNO 1

F2 - Acquisition Parameters  
 Date\_ 20090818  
 Time 17.00

INSTRUM spect  
 PROBHD 5 mm QNP 1H/1  
 PULPROG zg30  
 TD 65536  
 SOLVENT DMSO  
 NS 64  
 DS 2

SWH 6172.839 Hz  
 FIDRES 0.094190 Hz  
 AQ 5.3084660 sec  
 RG 322.5  
 DW 81.000 usec  
 DE 6.00 usec  
 TE 300.0 K  
 D1 1.00000000 sec

==== CHANNEL f1 =====  
 NUC1 1H  
 P1 9.25 usec  
 PL1 0.00 dB  
 SF01 300.1318534 MHz

F2 - Processing parameters  
 SI 32768  
 SF 300.1300000 MHz  
 WDW EM  
 SSB 0  
 LB 0.30 Hz  
 GB 0  
 PC 1.00

S123

- 144.854
- 140.588
- 138.975
- 136.871
- 136.572
- 130.583
- 130.360
- 127.658
- 127.501
- 126.264
- 124.366
- 122.179
- 121.923
- 121.188
- 120.269
- 112.936

Compound 14

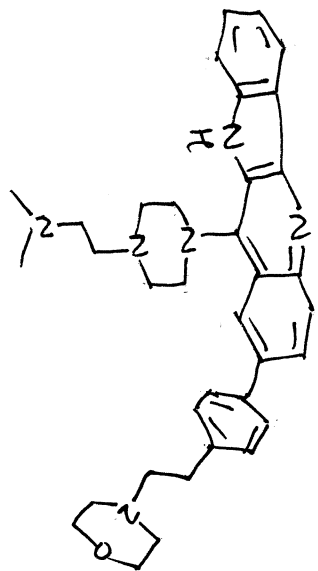

VB-GSA-198

- 67.075
- 60.855
- 57.436
- 56.673
- 54.865
- 54.156
- 51.617
- 46.275
- 41.236
- 40.958
- 40.680
- 40.401
- 40.123
- 39.845
- 39.567
- 32.873

0.967

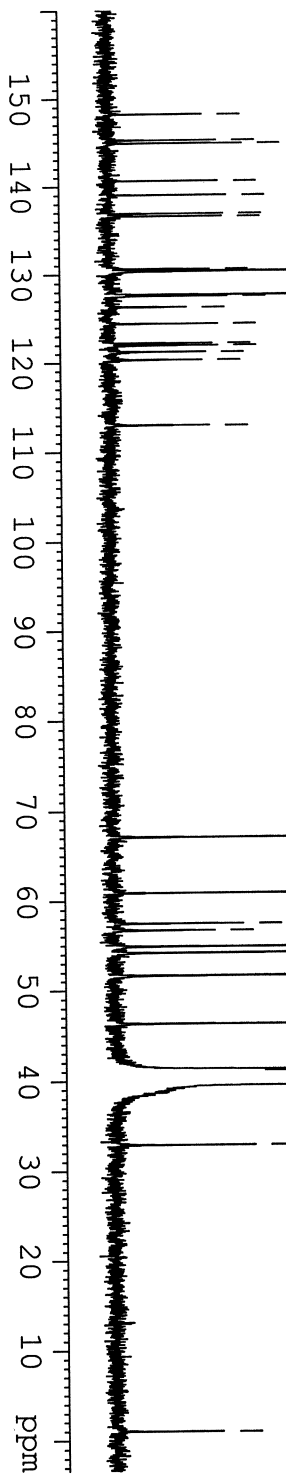

Current Data Parameters  
 NAME VB-GSA-198  
 EXPNO 2  
 PROCNO 1

F2 - Acquisition Parameters  
 Date\_ 20090819  
 Time 9.02

INSTRUM spect  
 PROBHID 5 mm QNP 1H/1  
 PULPROG zgpg30  
 TD 65536  
 SOLVENT ~~DMSO~~ *DMSO-d4*  
 NS 14821  
 DS 4

SWH 17985.611 Hz  
 FIDRES 0.274439 Hz  
 AQ 1.8219508 sec  
 RG 912.3  
 DW 27.800 usec  
 DE 6.00 usec  
 TE 300.0 K  
 D1 2.00000000 sec  
 d11 0.03000000 sec  
 d12 0.00002000 sec

==== CHANNEL F1 =====  
 NUC1 13C  
 P1 6.00 usec  
 PL1 2.00 dB  
 SFO1 75.4752653 MHz

==== CHANNEL F2 =====  
 CPDPRG2 waltz16  
 NUC2 1H  
 PCPD2 90.00 usec  
 PL2 0.00 dB  
 PL12 20.00 dB  
 PL13 20.00 dB  
 SFO2 300.1312005 MHz

S124

=====  
 Injection Date : 8/18/2009 5:14:55 PM  
 Sample Name : VB-GSA-198 Location : Vial 2  
 Acq. Operator : Karen Inj : 1  
 Acq. Instrument : Instrument 1 Inj Volume : 0.2 µl  
 Method : C:\HPCHEM\1\METHODS\LC\_MS.M  
 Last changed : 8/18/2009 5:13:56 PM by Karen  
 Zorbax SB ODS,20:80:0.25; MeCN/water/formicA, POS, 350-650; frag 70; 30C, cap volt 3000, gas temp 350

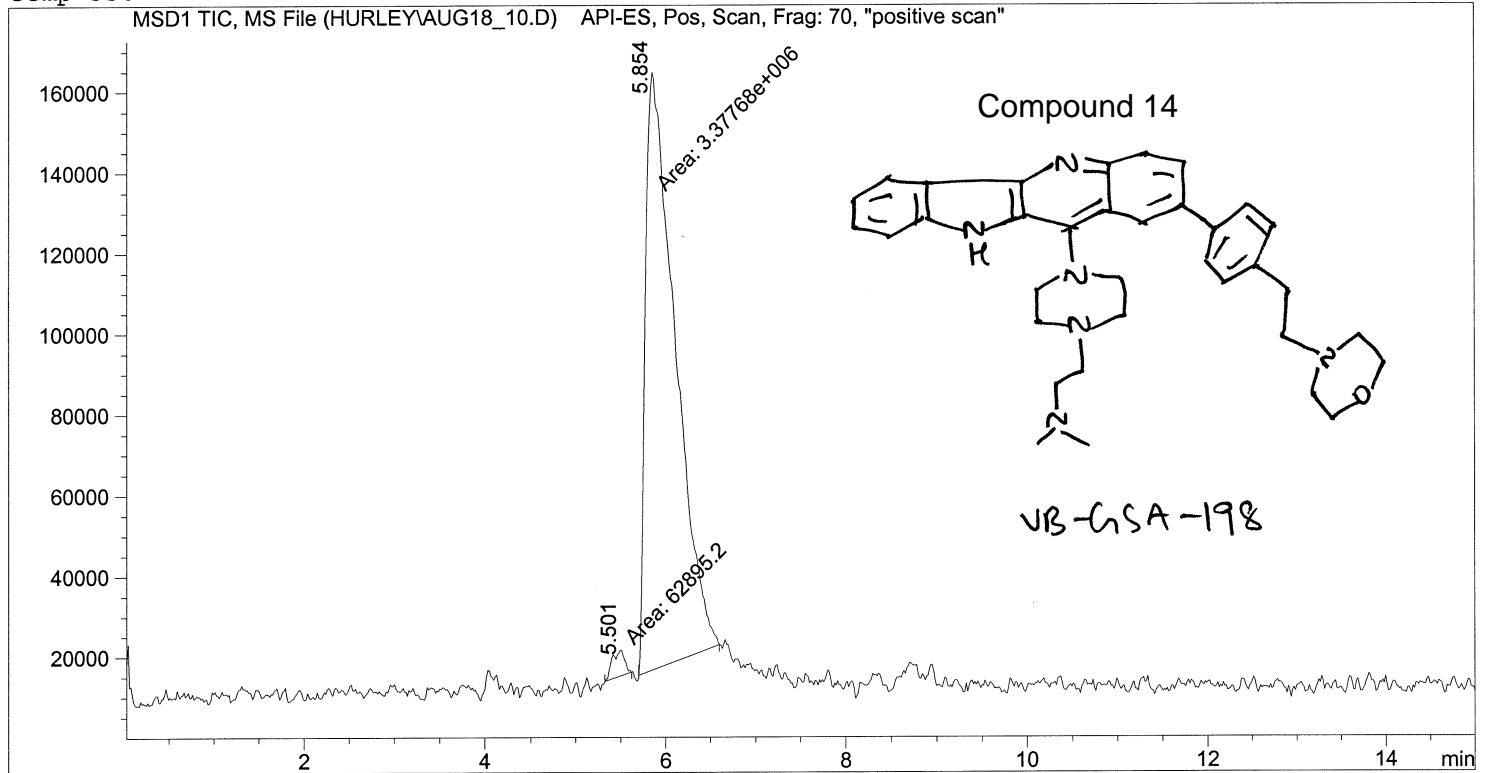

=====  
 Area Percent Report  
 =====

Sorted By : Signal  
 Multiplier : 1.0000  
 Dilution : 1.0000  
 Use Multiplier & Dilution Factor with ISTDs

Signal 1: MSD1 TIC, MS File

| Peak # | RetTime [min] | Type | Width [min] | Area      | Height     | Area %  |
|--------|---------------|------|-------------|-----------|------------|---------|
| 1      | 5.501         | MM   | 0.1576      | 6.28952e4 | 6652.23193 | 1.8280  |
| 2      | 5.854         | MM   | 0.3792      | 3.37768e6 | 1.48440e5  | 98.1720 |

Totals : 3.44057e6 1.55092e5

=====  
 \*\*\* End of Report \*\*\*

=====  
Injection Date : 8/18/2009 5:14:55 PM  
Sample Name : VB-GSA-198 Location : Vial 2  
Acq. Operator : Karen Inj : 1  
Acq. Instrument : Instrument 1 Inj Volume : 0.2 µl  
Method : C:\HPCHEM\1\METHODS\LC\_MS.M  
Last changed : 8/18/2009 5:13:56 PM by Karen  
Zorbax SB ODS,20:80:0.25; MeCN/water/formicA, POS, 350-650; frag 70; 30C, cap volt 3000,  
gas temp 350

Current Chromatogram (s)

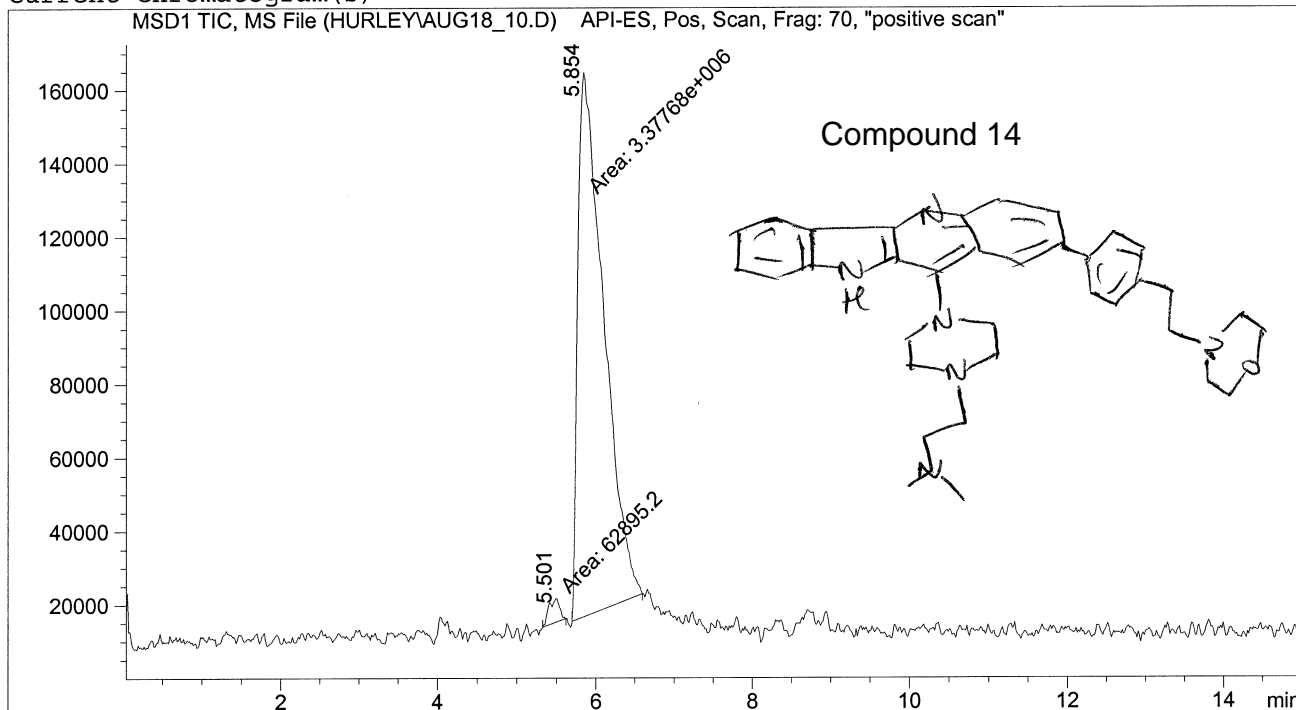

Apex Mass Spectrum of Peak 5.854 of AUG18\_10.D

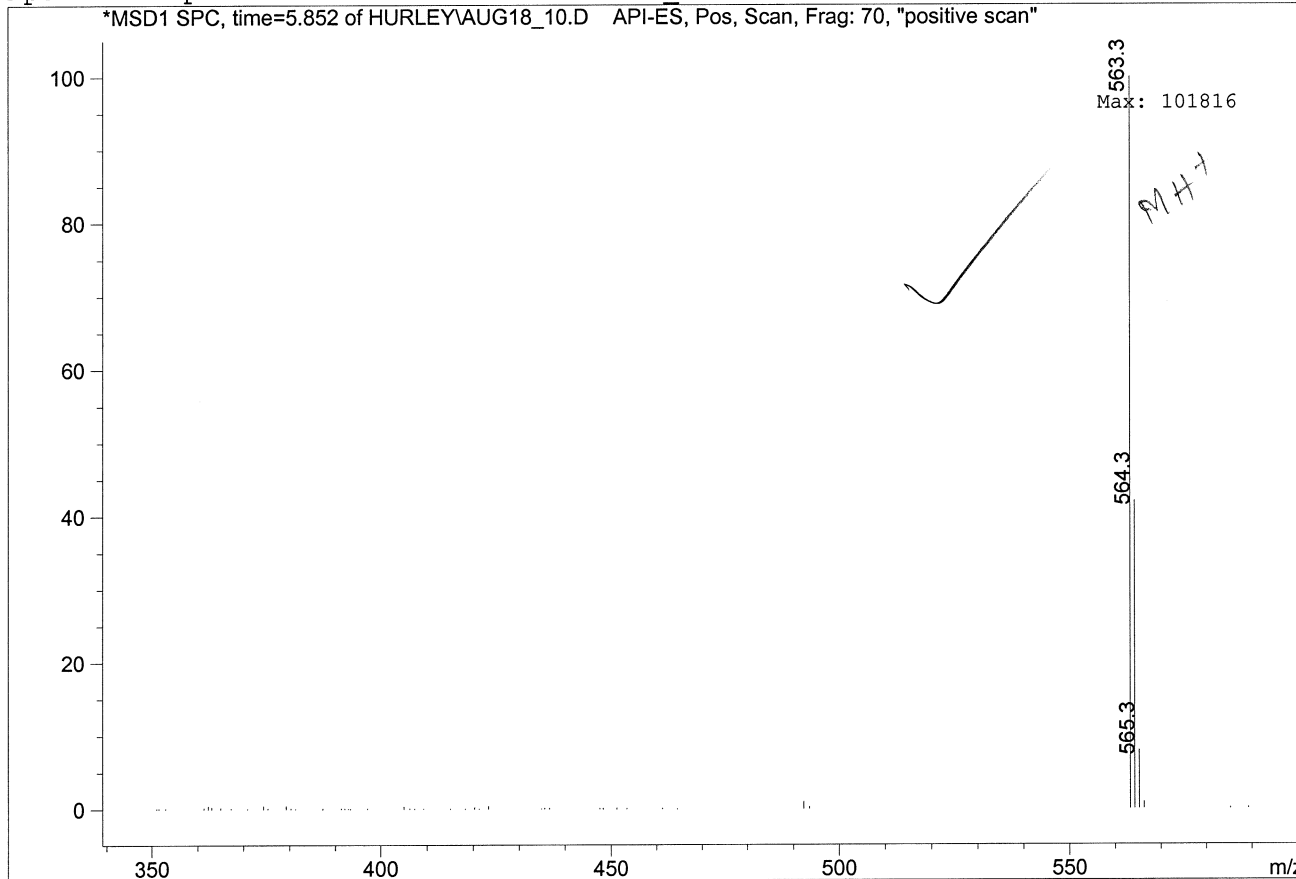

VB\_GSA\_198 #16-19 RT: 0.52-0.62 AV: 4 NL: 1.28E7  
T: + p Full ms [155.00-2000.00]

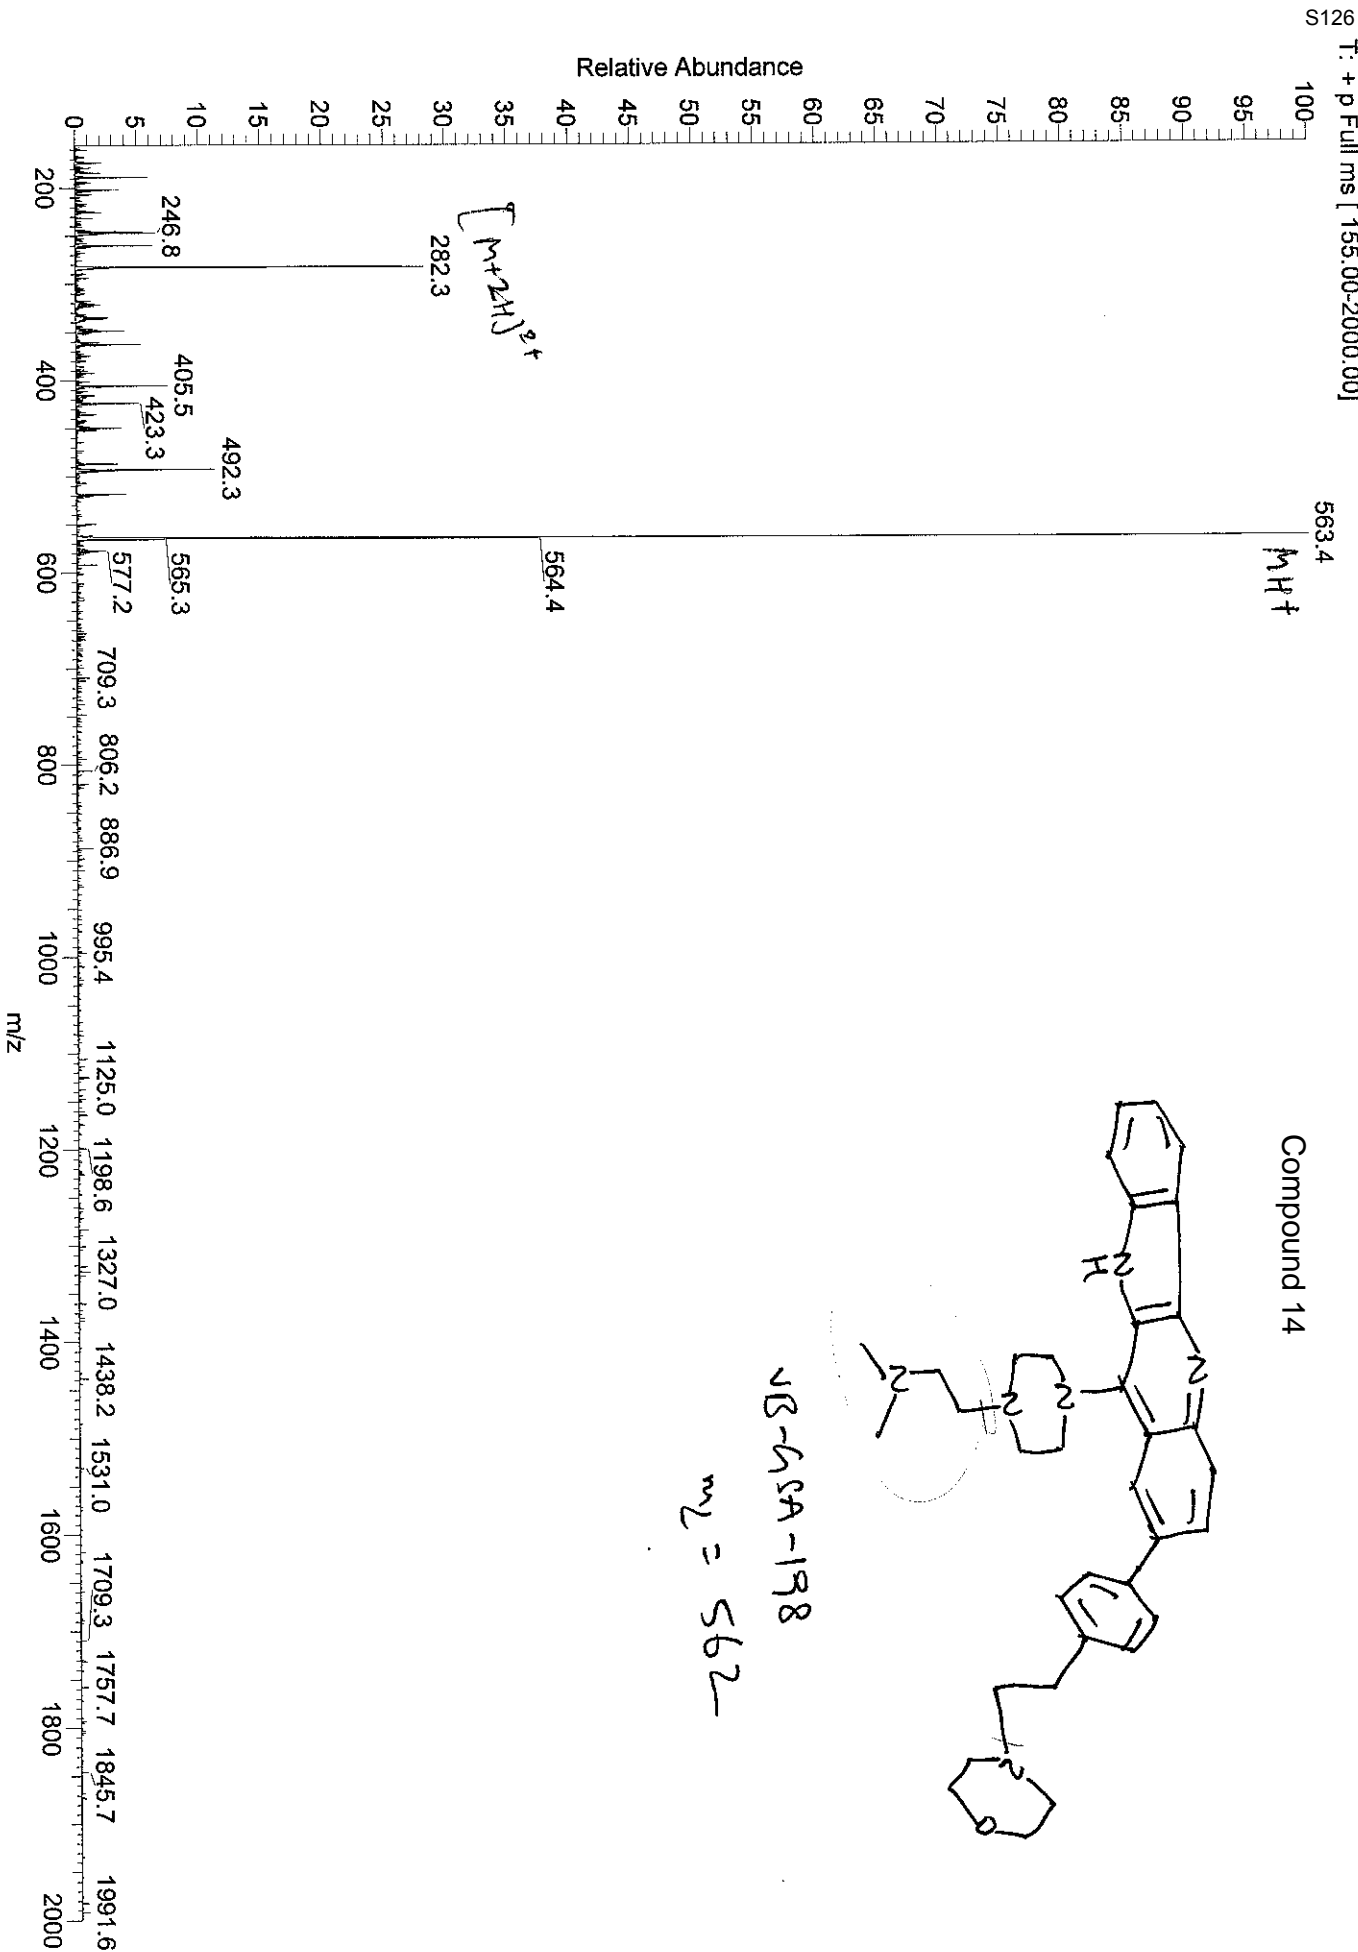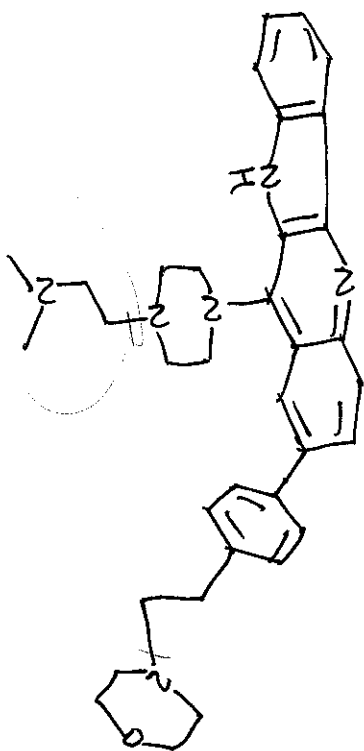

S127  
VB\_GSA\_198 #16-19 RT: 0.52-0.62 AV: 4 NL: 1.28E7  
T: + p Full ms [155.00-2000.00]

Compound 14

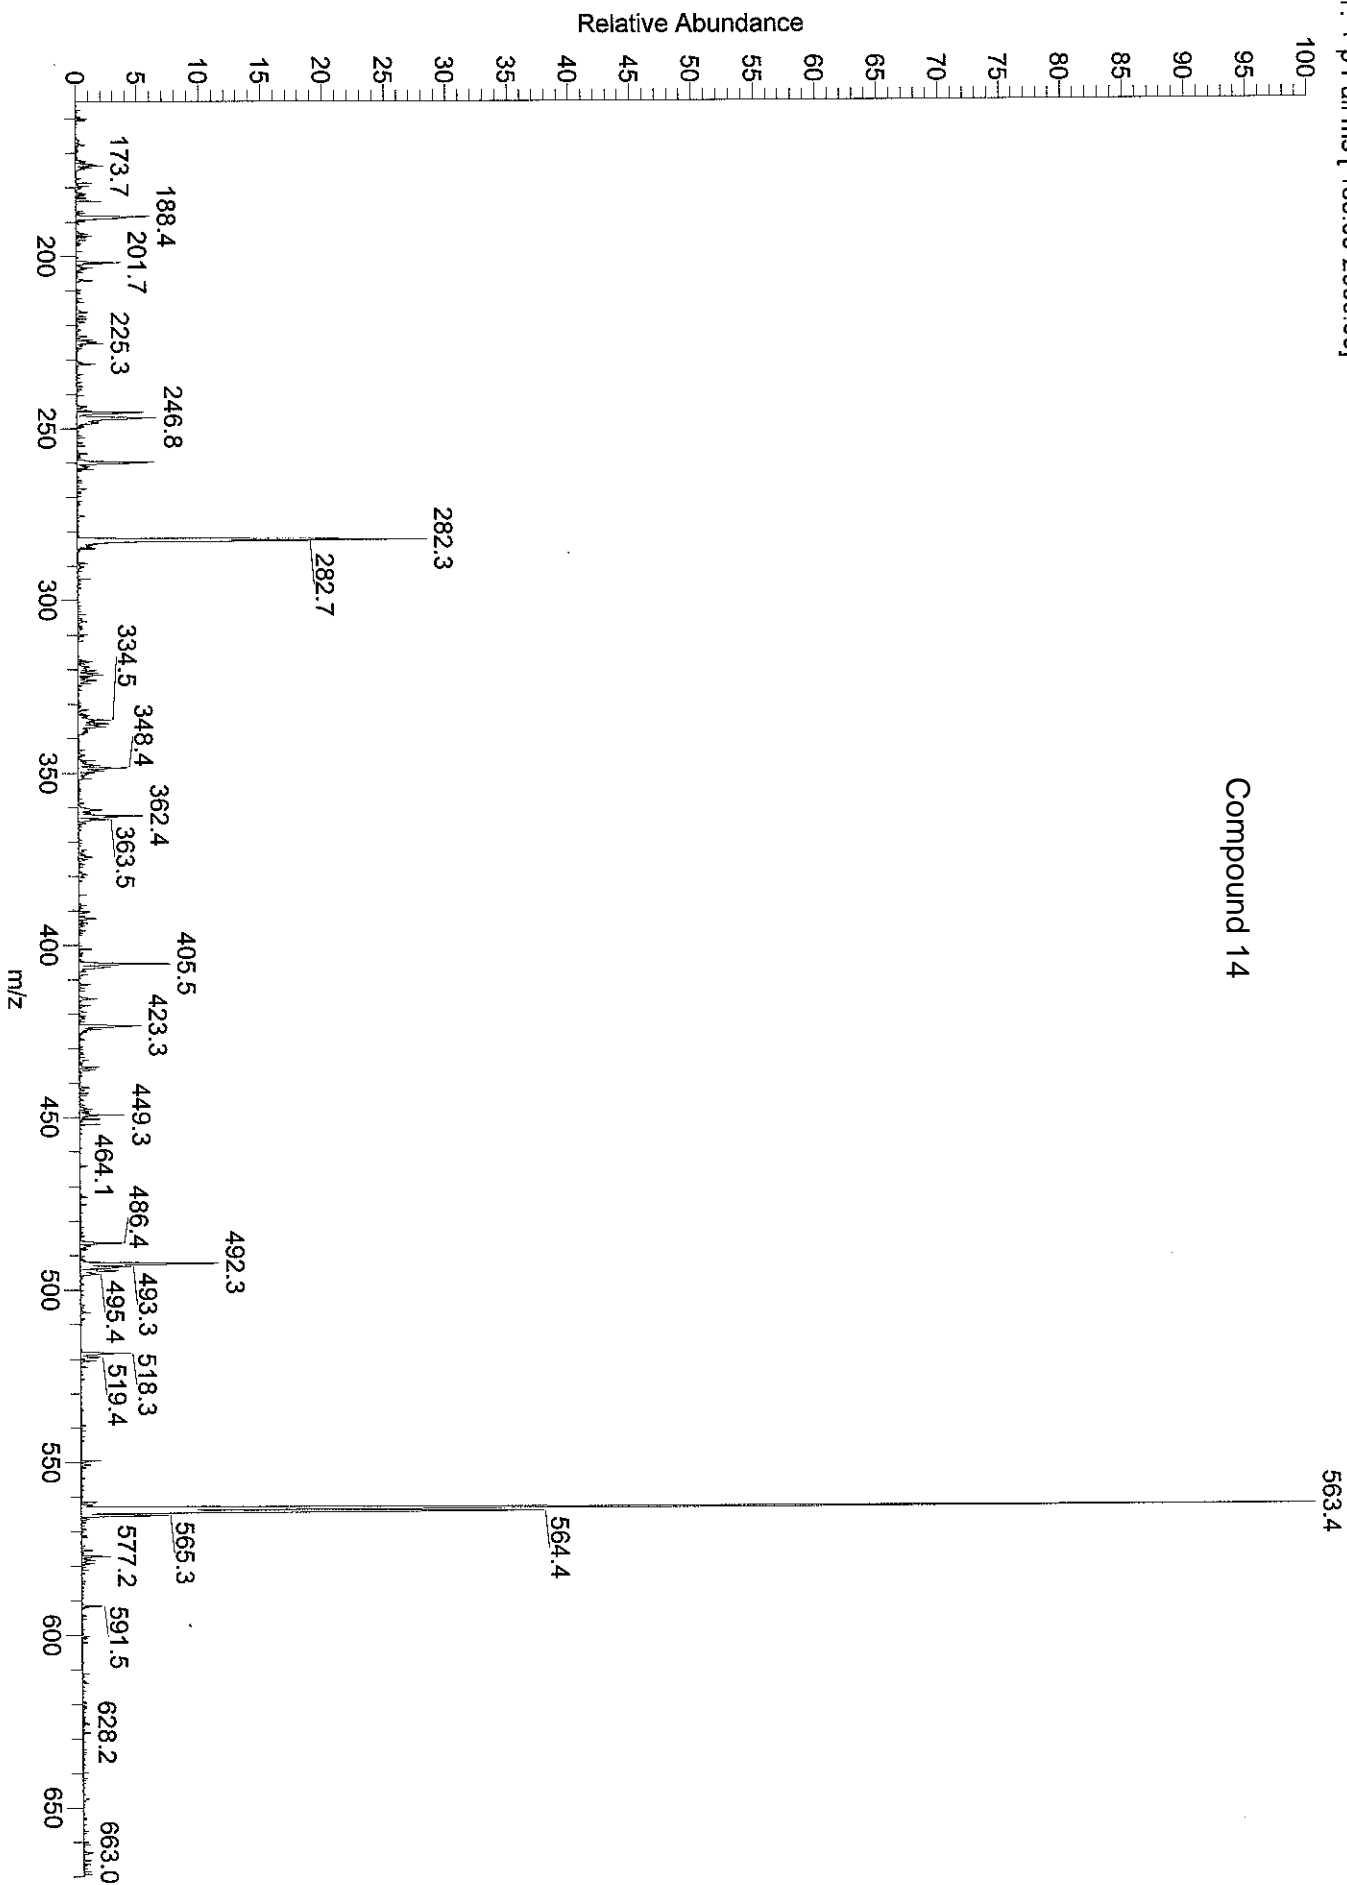

VB\_GSA\_198 #9-13 RT: 0.29-0.42 AV: 5 NL: 4.07E6  
T: + p Full ms2 563.30@30.00 [155.00-2000.00]

Compound 14

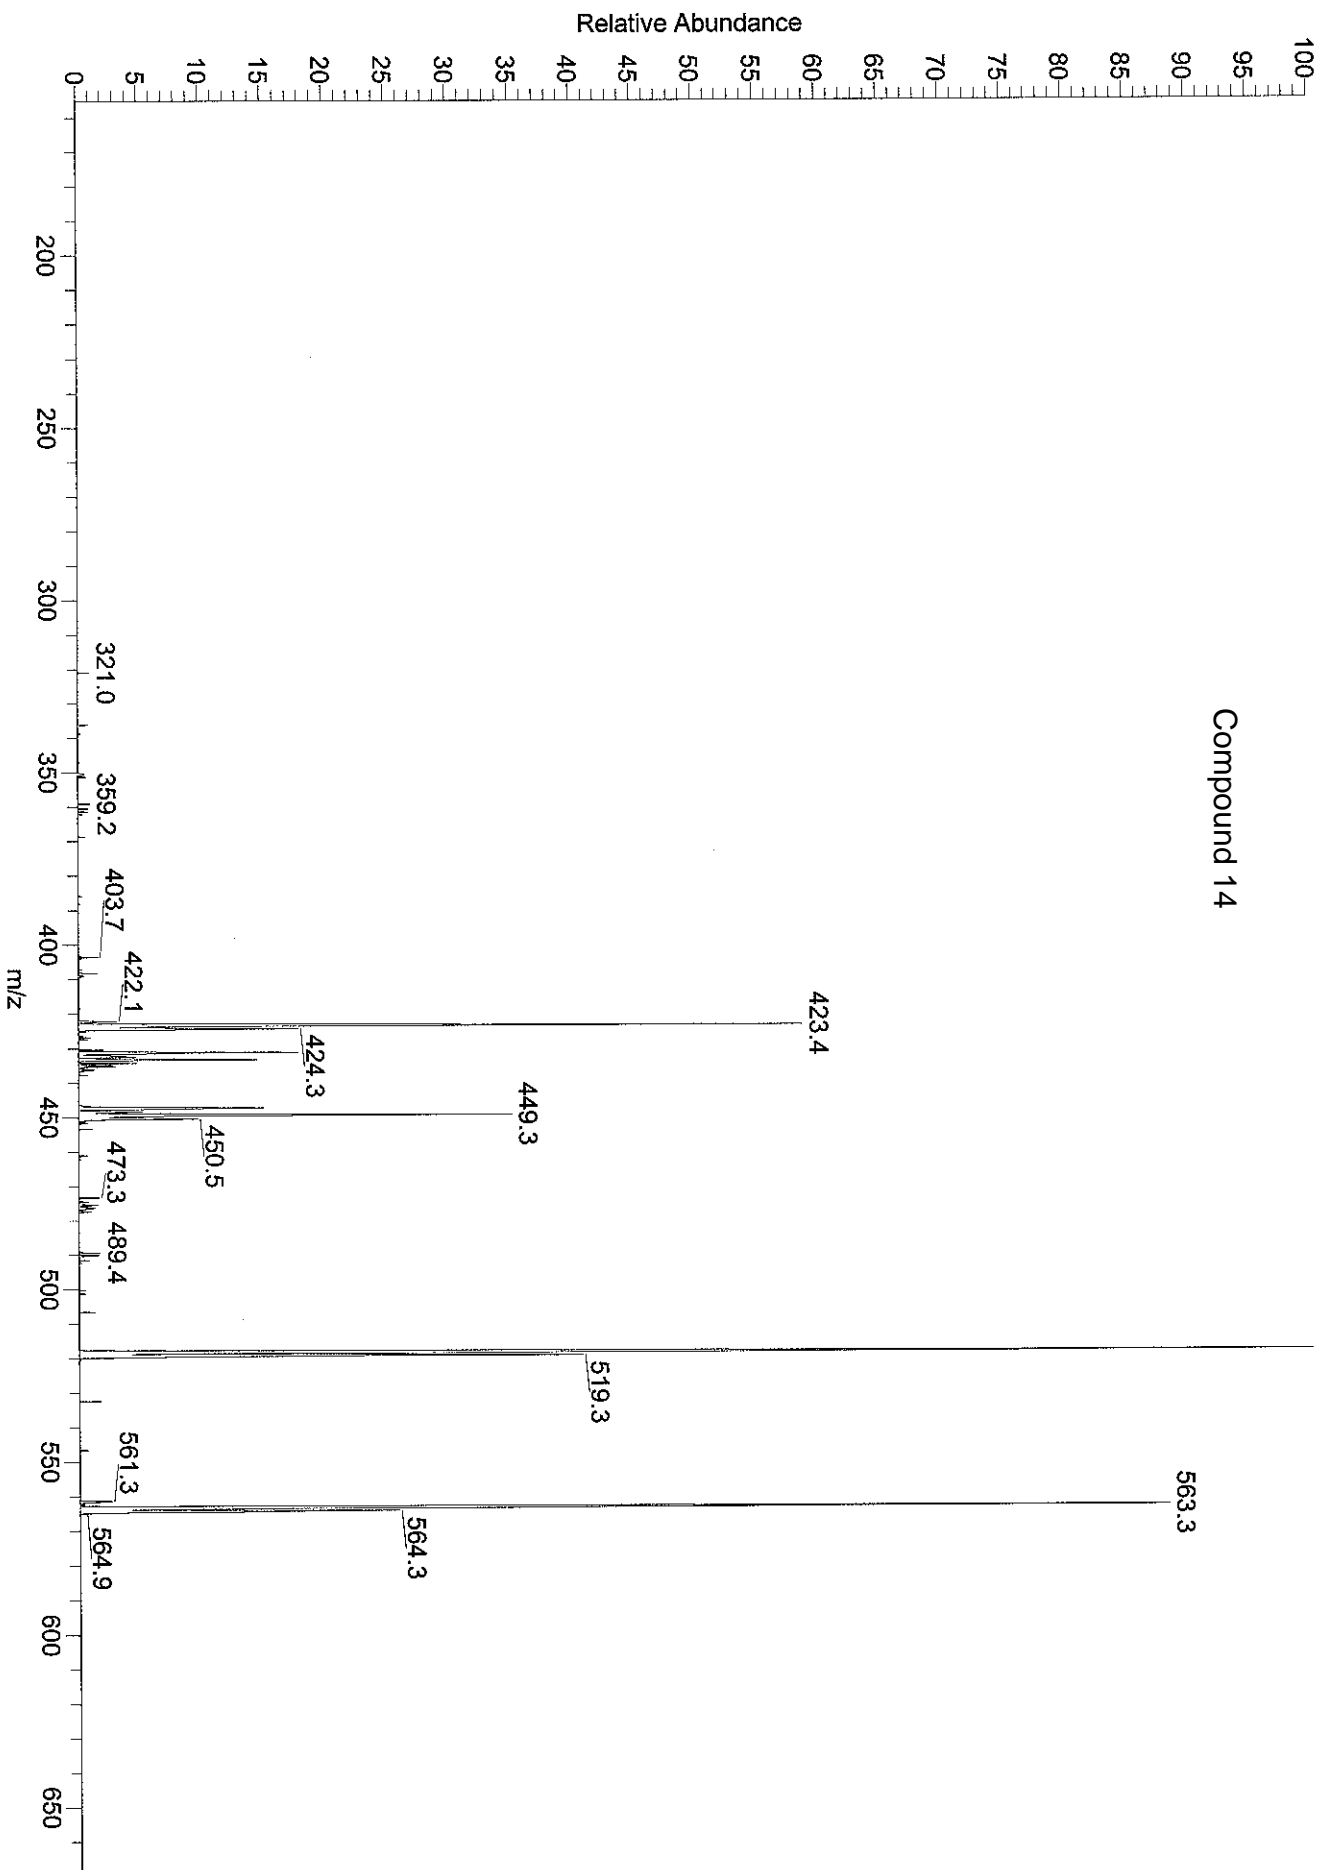



## Generic Display Report

## Analysis Info

Analysis Name D:\DATA\Facility\_August\_09\VB\_GSA\_198\_000001.d  
Method ESI\_101506  
Sample Name VB\_GSA\_198  
Comment VB\_GSA\_198  
ACN:H2O 1:1 0.1% FA

Acquisition Date 8/21/2009 5:13:46 PM

Operator  
Instrument apex-Qe

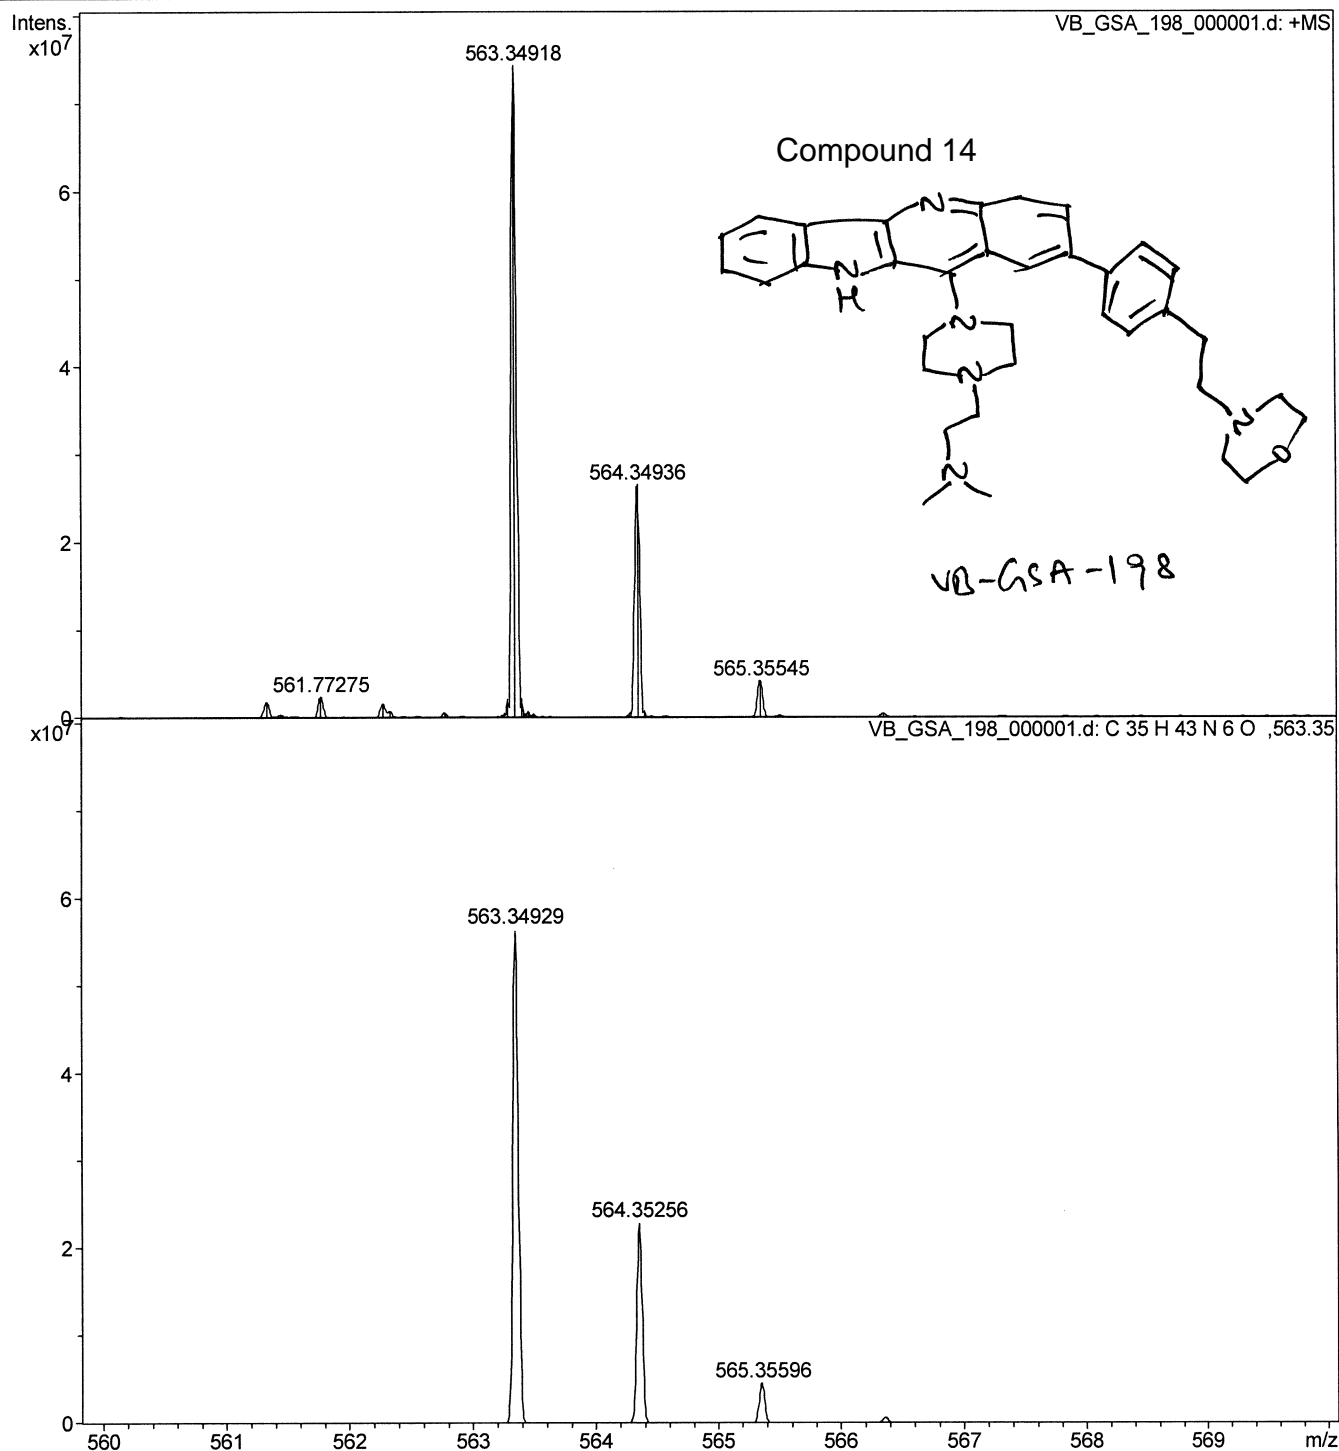

## SmartFormula Manually

Min

C<sub>25</sub>

Max

C<sub>25</sub>-H

Generate

Help

Note: for m &lt; 2000 the elements C, H, N, and O are considered implicitly.

Measured m/z

563.34918

Tolerance

2

mDa

Charge

1

| #  | Mol. Formula                                                  | m/z       | err [mDa] | lerr [ppm] | err [ppm] | mean err [ppm] | mSigma | Sigma Rank | rdb  | N rule | e <sup>-</sup> |
|----|---------------------------------------------------------------|-----------|-----------|------------|-----------|----------------|--------|------------|------|--------|----------------|
| 1  | C <sub>25</sub> H <sub>48</sub> N <sub>5</sub> O <sub>9</sub> | 562.34465 | -1.50     | 2.7        | -2.7      | -0.8           | 626.3  | 5          | 4.5  | ok     | even           |
| 2  | C <sub>26</sub> H <sub>44</sub> N <sub>9</sub> O <sub>5</sub> | 562.34599 | -0.44     | 0.8        | -0.8      | 1.7            | 714.6  | 7          | 9.5  | ok     | even           |
| 3  | C <sub>27</sub> H <sub>40</sub> N <sub>13</sub> O             | 562.34733 | 0.66      | 1.2        | 1.2       | 4.0            | 612.9  | 4          | 14.5 | ok     | even           |
| 4  | C <sub>32</sub> H <sub>49</sub> O <sub>8</sub>                | 561.34219 | -0.71     | 1.3        | -1.3      | 1.4            | 714.1  | 6          | 8.5  | ok     | even           |
| 5  | C <sub>33</sub> H <sub>45</sub> N <sub>4</sub> O <sub>4</sub> | 561.34353 | 0.43      | 0.8        | 0.8       | 3.8            | 717.1  | 8          | 13.5 | ok     | even           |
| 6  | C <sub>34</sub> H <sub>41</sub> N <sub>8</sub>                | 561.34487 | 1.52      | 2.7        | 2.7       | 6.1            | 720.2  | 9          | 18.5 | ok     | even           |
| 7  | C <sub>34</sub> H <sub>47</sub> N <sub>2</sub> O <sub>5</sub> | 563.34795 | -1.23     | 2.2        | -2.2      | -0.7           | 16.8   | 1          | 12.5 | ok     | even           |
| 8  | C <sub>35</sub> H <sub>43</sub> N <sub>6</sub> O              | 563.34929 | 0.10      | 0.2        | 0.2       | 1.6            | 26.9   | 2          | 17.5 | ok     | even           |
| 9  | C <sub>36</sub> H <sub>42</sub> N <sub>5</sub> O              | 560.33839 | -1.64     | 2.9        | -2.9      | -0.6           | 730.5  | 10         | 18.5 | ok     | even           |
| 10 | C <sub>42</sub> H <sub>44</sub> N                             | 562.34683 | 0.98      | 1.7        | 1.7       | 3.4            | 577.5  | 3          | 21.5 | ok     | even           |

Compound 14

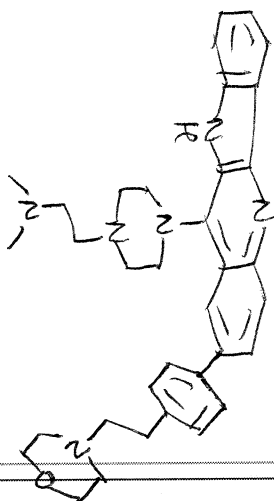
 Automatically locate monoisotopic peak
 Maximum number of formulas

500

 Check rings plus double bonds
 Minimum

-0.5

Maximum

40

Electron configuration

even

 Filter H/C element ratio
 Minimum H/C

0

Maximum H/C

3

 Estimate carbon number
 Generate immediately

Show Pattern

Compound 15

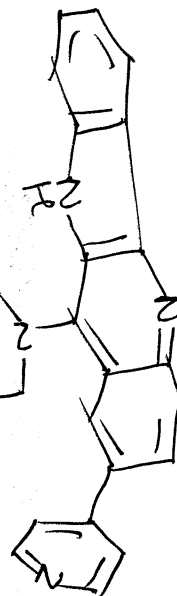

VB-GSA-187  
(DMSO-d<sub>6</sub>)

- 8.737
- 8.720
- 8.687
- 8.332
- 8.307
- 8.292
- 8.262
- 8.074
- 8.071
- 8.045
- 8.041
- 7.875
- 7.858
- 7.699
- 7.673
- 7.648
- 7.625
- 7.308
- 7.285
- 7.260

- 3.610
- 3.187
- 2.866
- 2.846
- 2.826
- 2.765
- 2.505

0.001

Current Data Parameters  
 NAME VB-GSA-187  
 EXPNO 101  
 PROCNO 1

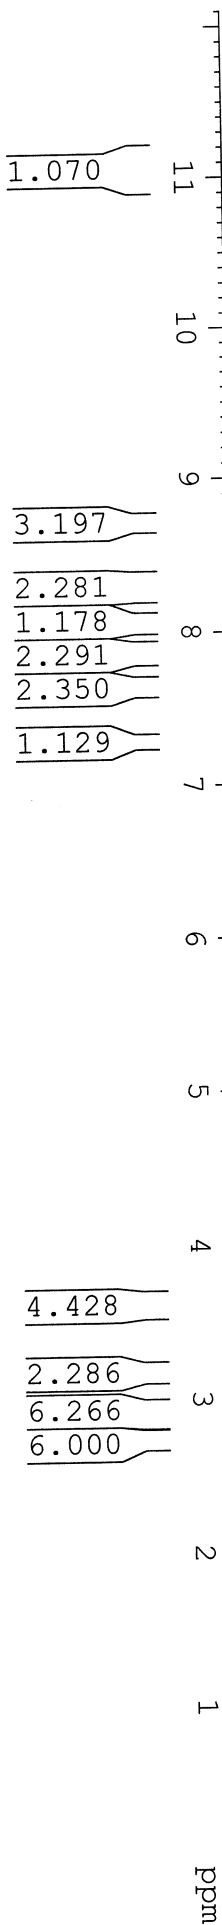

\* DMSO-d<sub>6</sub>

- 151.289
- 148.860
- 148.144
- 145.937
- 145.024
- 137.379
- 133.473
- 132.164
- 131.012
- 130.638
- 127.475
- 125.605
- 124.112
- 122.554
- 122.278
- 122.092
- 122.040
- 120.442
- 113.039

Compound 15

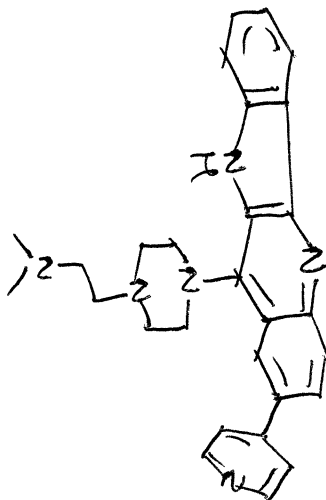

VB-GSA-187  
(DMSO-d<sub>6</sub>)

- 54.535
- 54.225
- 53.520
- 51.526
- 44.098
- 41.224
- 40.946
- 40.668
- 40.390
- 40.111
- 39.833
- 39.555

Current Data Parameters  
 NAME VB-GSA-187  
 EXPNO 102  
 PROCNO 1

F2 - Acquisition Parameters

(DMSO-d<sub>6</sub>)

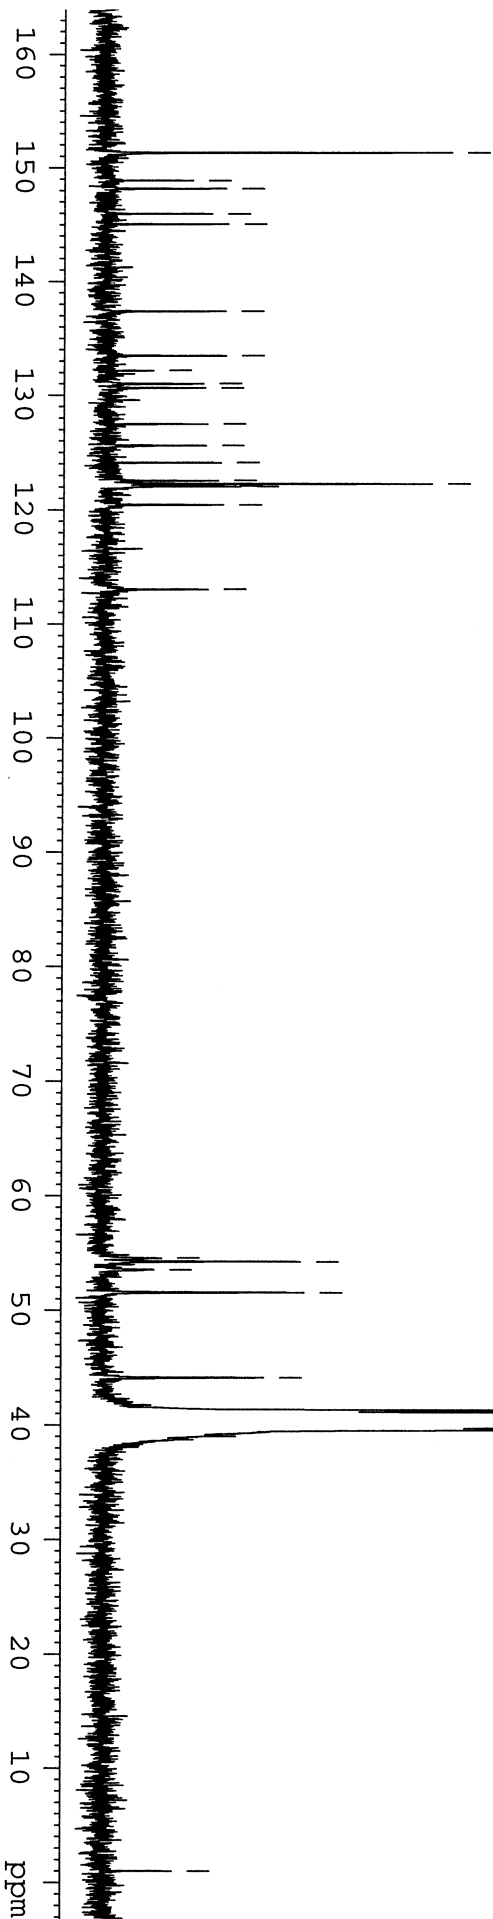

0.967

Reported by User: Jatinder J. (Jatinder)

Project Name: BIO5\_HPLC1

## SAMPLE INFORMATION

|                            |                                                 |
|----------------------------|-------------------------------------------------|
| Sample Name: vb-187 prep   | Acquired By: Jatinder                           |
| Sample Type: Unknown       | Date Acquired: 9/28/2009 4:07:06 PM             |
| Vial: 57                   | Acq. Method Set: 10_90B_in                      |
| Injection #: 1             | Date Processed: 9/29/2009 8:48:11 AM, 9/29/2009 |
| Injection Volume: 10.00 ul | Processing Method: Peptide_general              |
| Run Time: 45.0 Minutes     | Channel Name: 2487Channel 1, 2487Channel 2      |
| Sample Set Name: Prime_Run | Proc. Chnl. Descr.: 220nm, 280nm                |

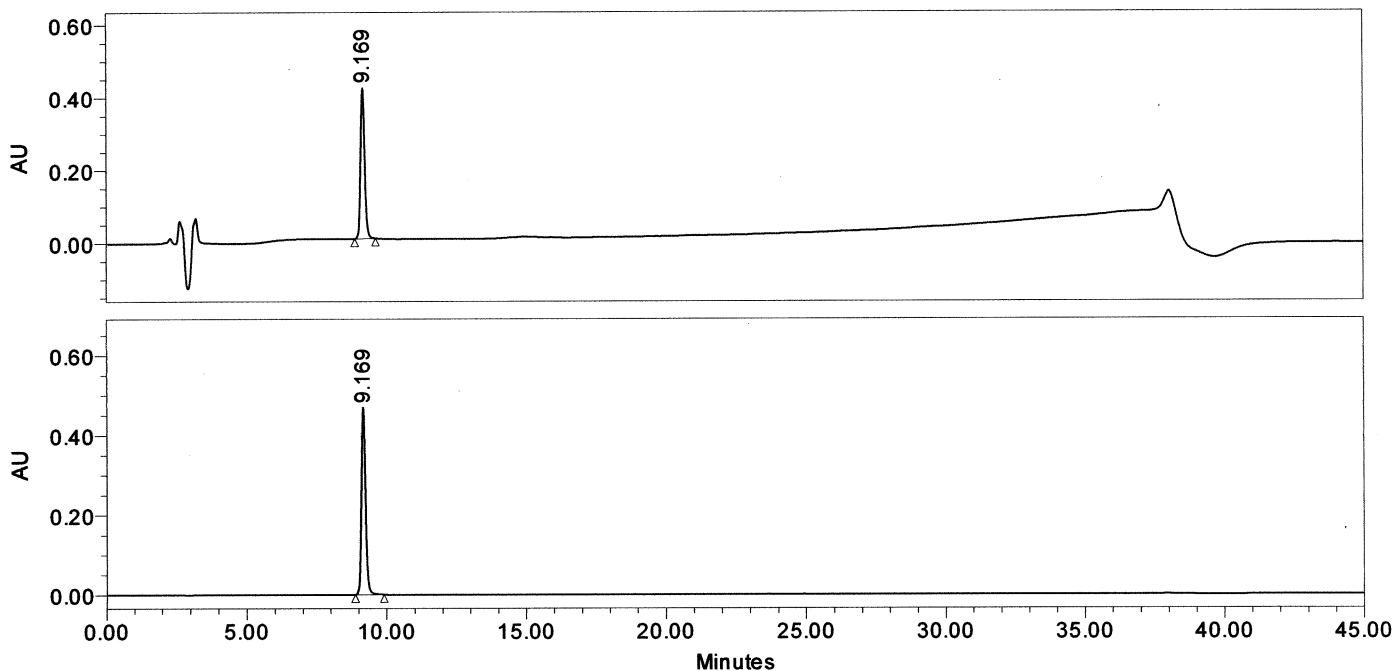

— Sample Name: vb-187 prep; Proc. Chan. Descr. 220nm  
— Sample Name: vb-187 prep; Proc. Chan. Descr. 280nm

Channel 220 nm  
Channel: 2487Channel 1

| RT | Area (μV*sec) | % Area | Channel       |
|----|---------------|--------|---------------|
| 1  | 4.35e+006     | 100.00 | 2487Channel 1 |

Channel 280 nm  
Channel: 2487Channel 2

| RT | Area (μV*sec) | % Area | Channel       |
|----|---------------|--------|---------------|
| 1  | 5.01e+006     | 100.00 | 2487Channel 2 |

## NOTES:

Compound 15

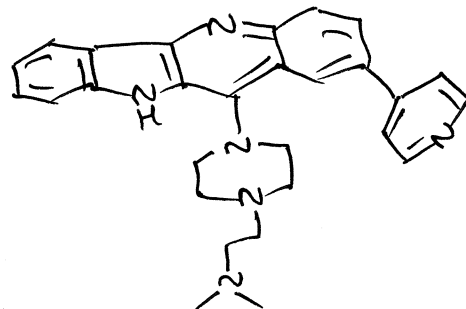

VB-GSA-187

VB-187 #26-27 RT: 0.93-0.96 AV: 2 NL: 6.64E5  
T: + p Full ms [100.00-2000.00] 226.1

Compound 15

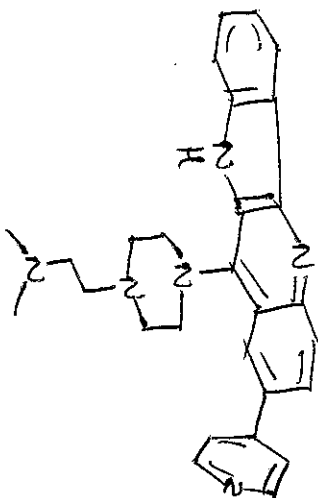

VB-LISA-187  
 $m_z \approx 450$

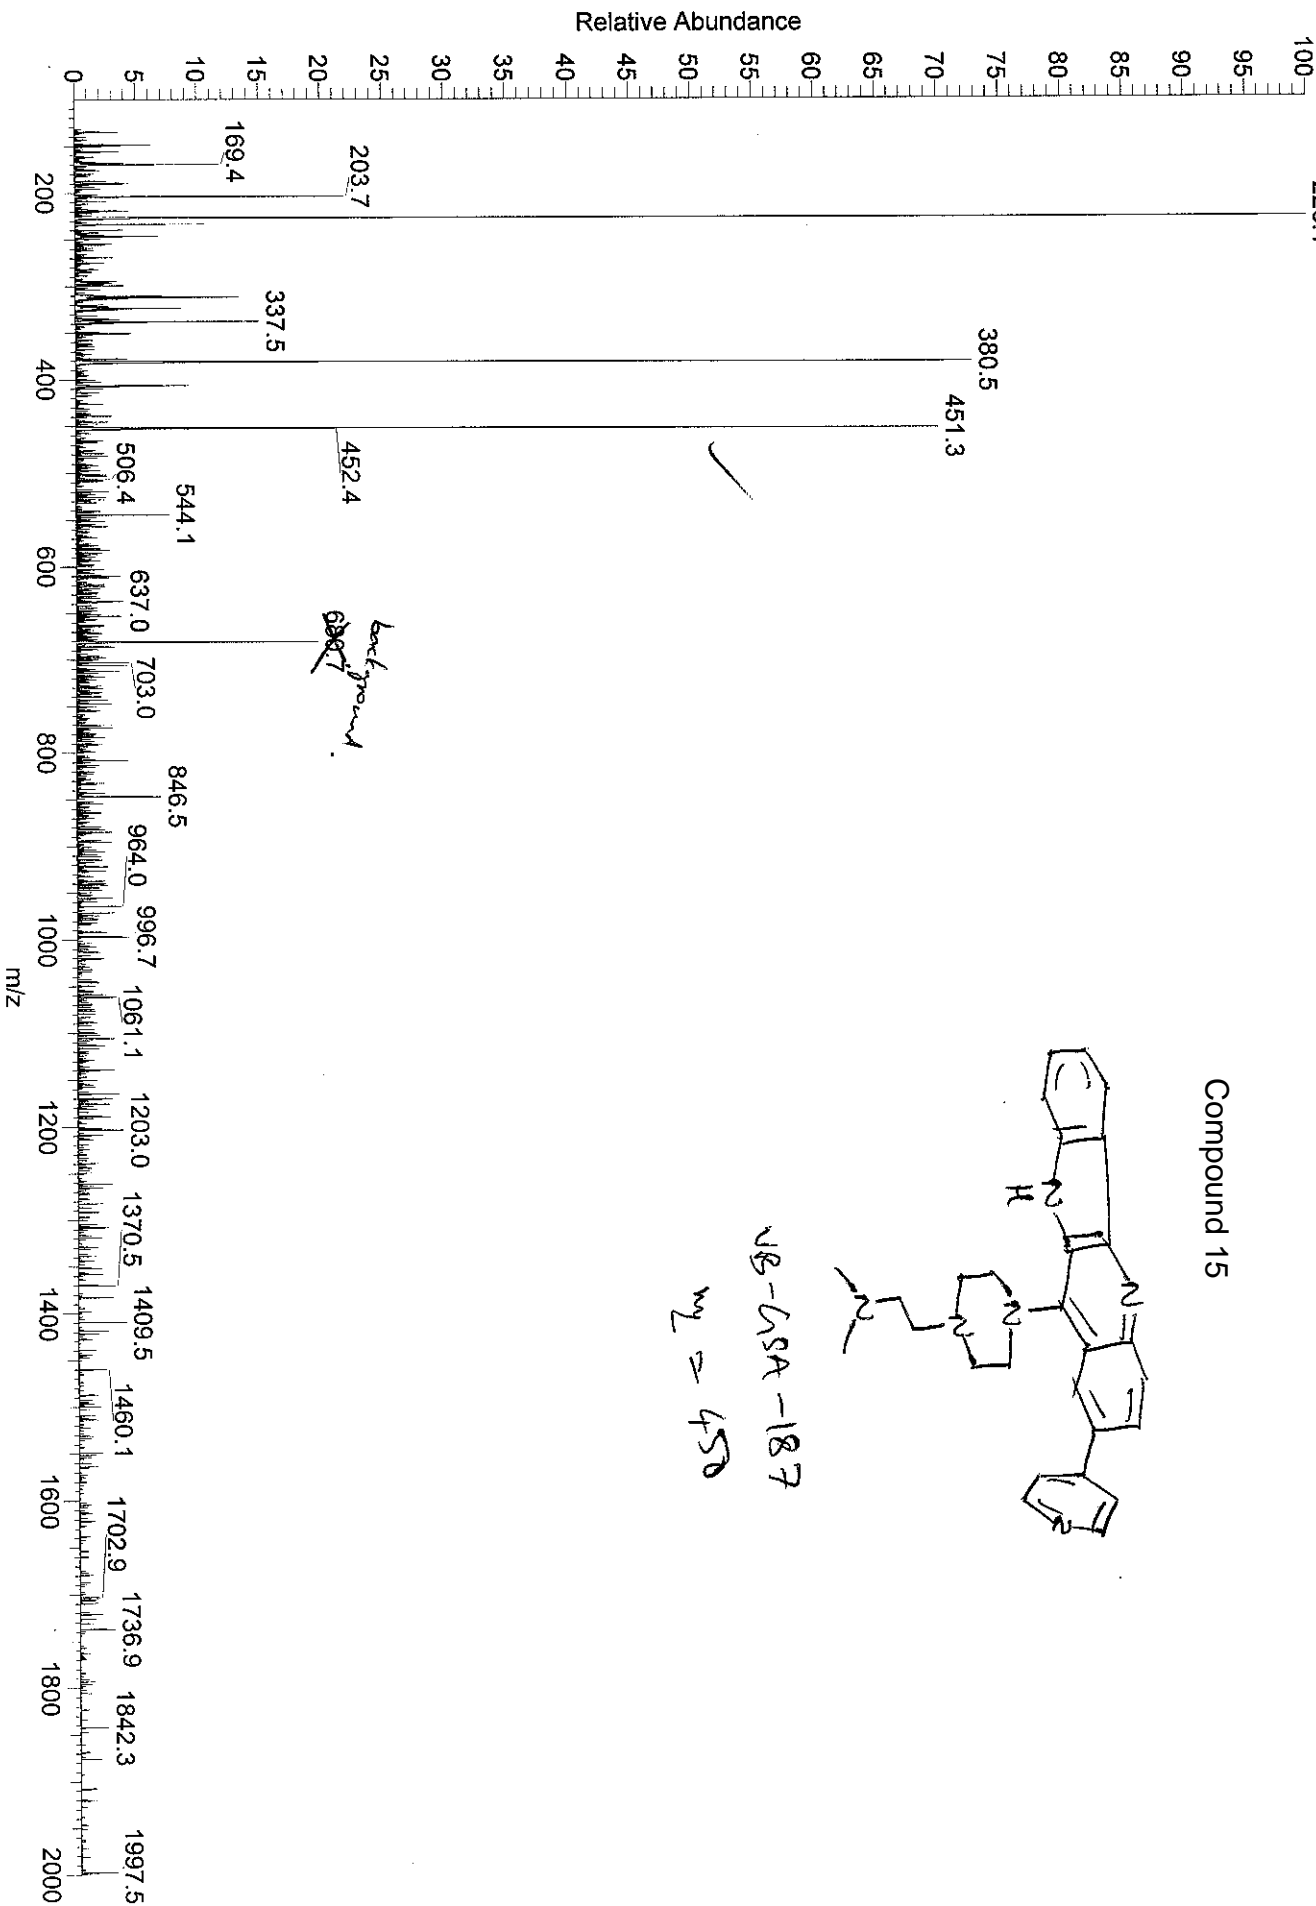

VB-187 #26-27 RT: 0.93-0.96 AV: 2 NL: 6.64E5  
ET: + p Full ms [100.00-2000.00]

226.1

Compound 15

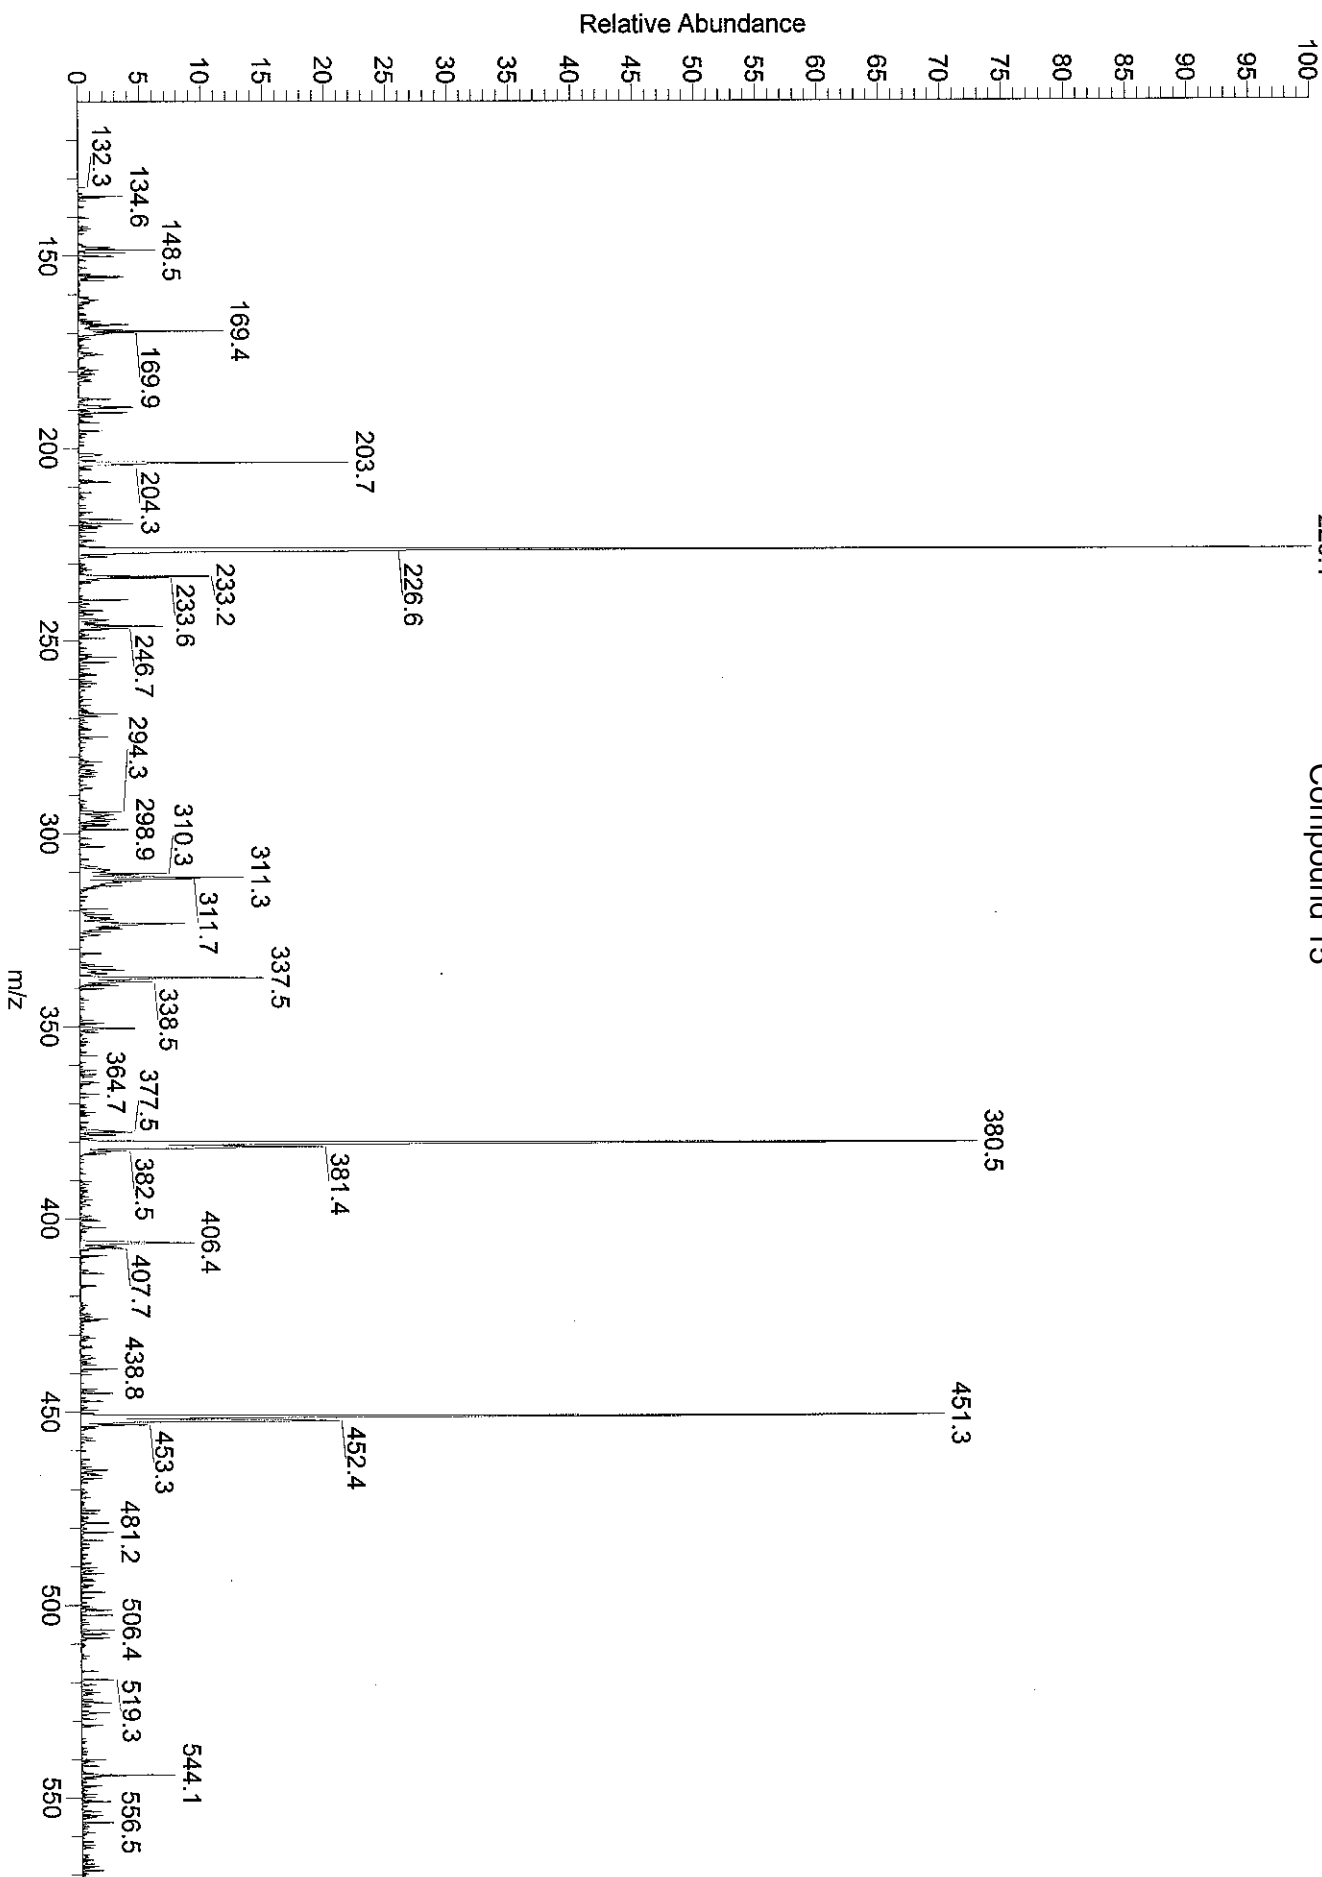

VB-187 #23-24 RT: 0.82-0.86 AV: 2 NL: 4.26E5  
T: + p Full ms2 380.00@30.00 [120.00-2000.00]

Compound 15

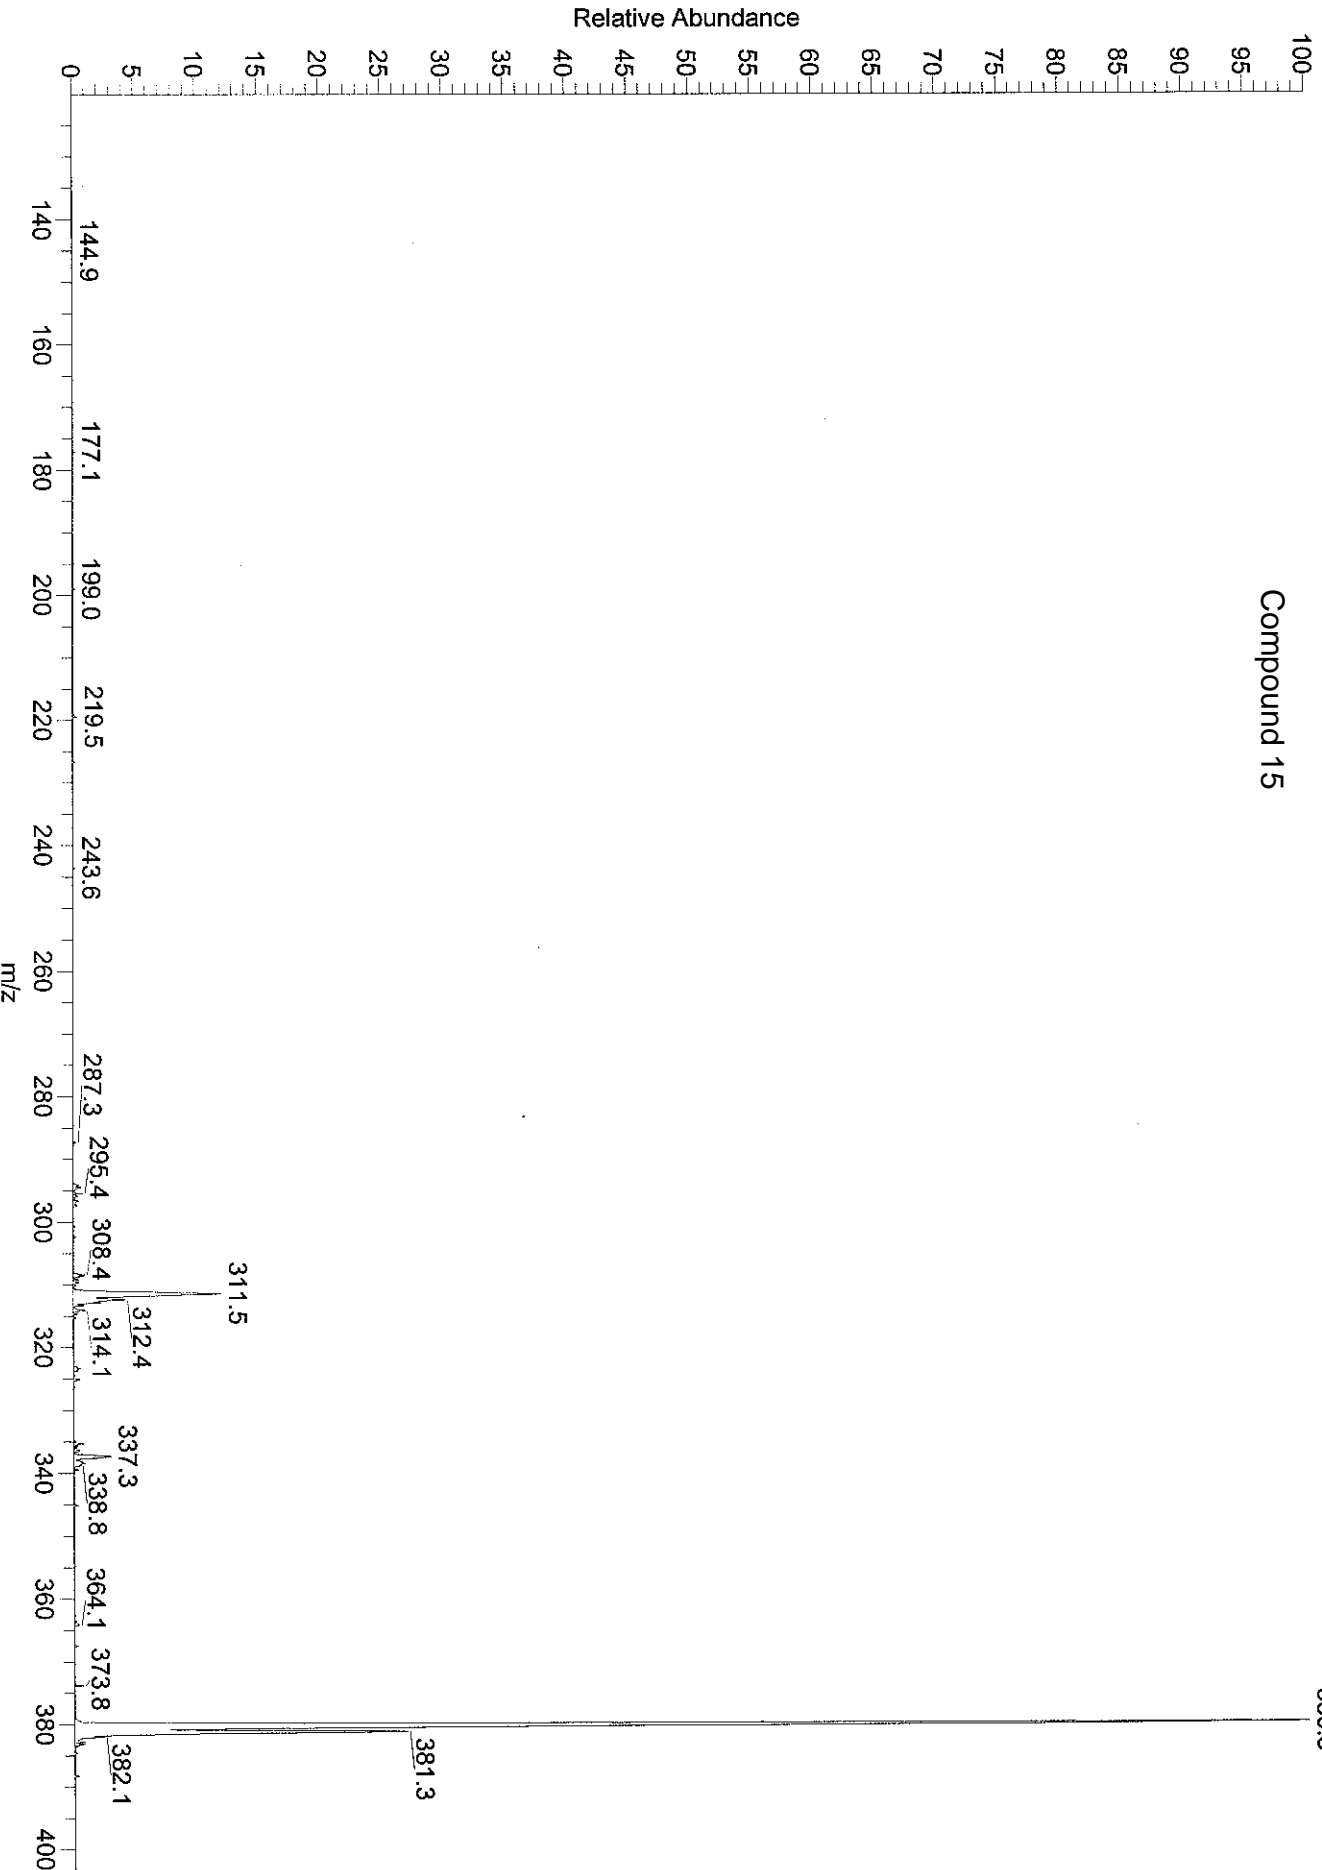



VB-187 #9-10 RT: 0.29-0.33 AV: 2 NL: 4.64E5  
T: + p Full ms2 451.00@25.00 [120.00-2000.00]

Compound 15

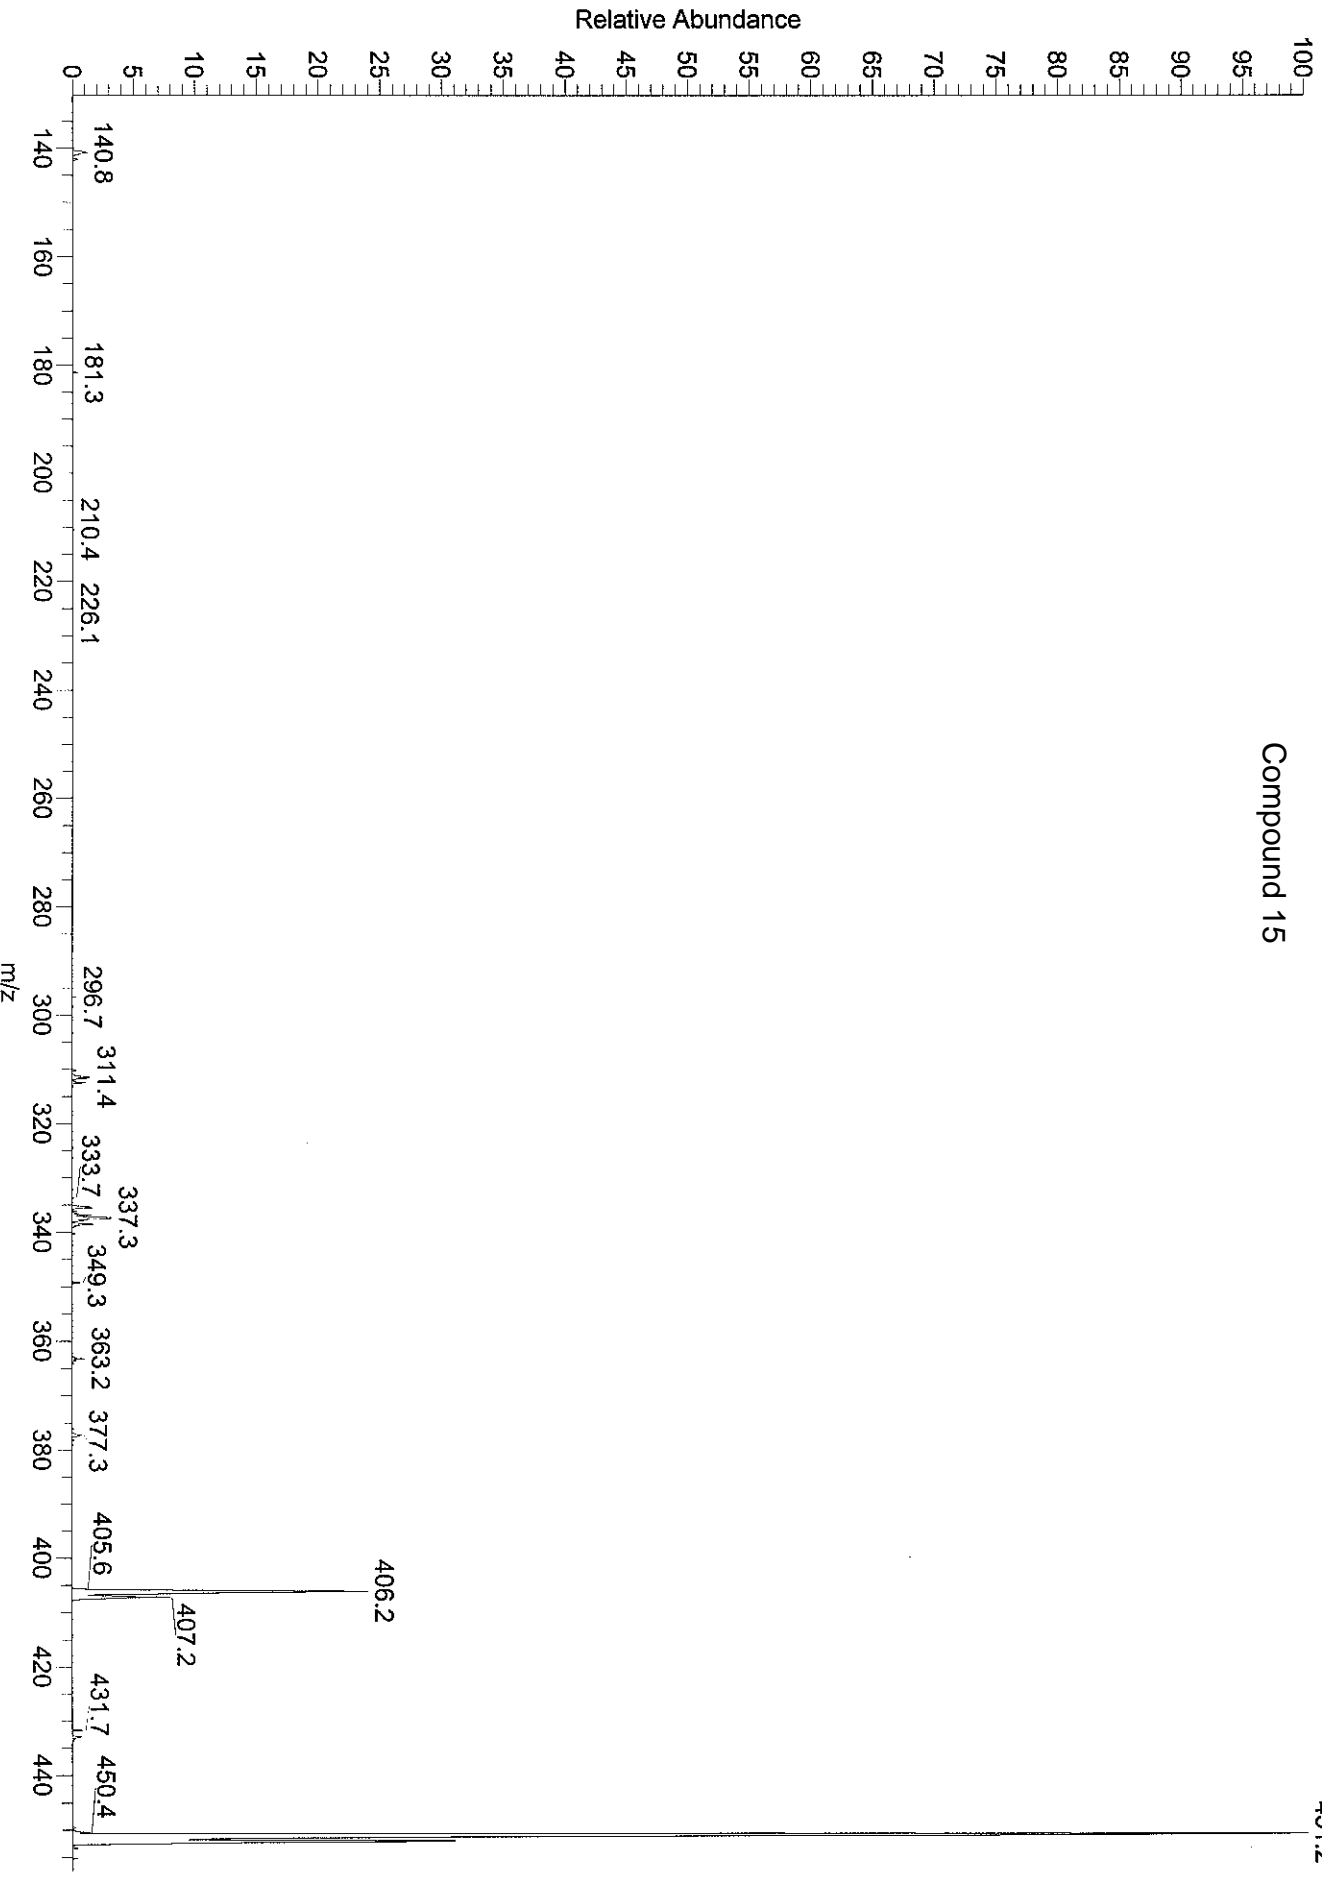

# Generic Display Report

**Analysis Info**  
Analysis Name: D:\DATA\Facility\_Nov\_09\VB-187\_000002.d  
Method: ESL\_101506  
Sample Name: VB-187  
Comment: Venkat B., ACN:H2O 1:1:0.1%FA

Acquisition Date: 11/13/2009 10:48:56 AM  
Operator: apex-Qe  
Instrument: apex-Qe

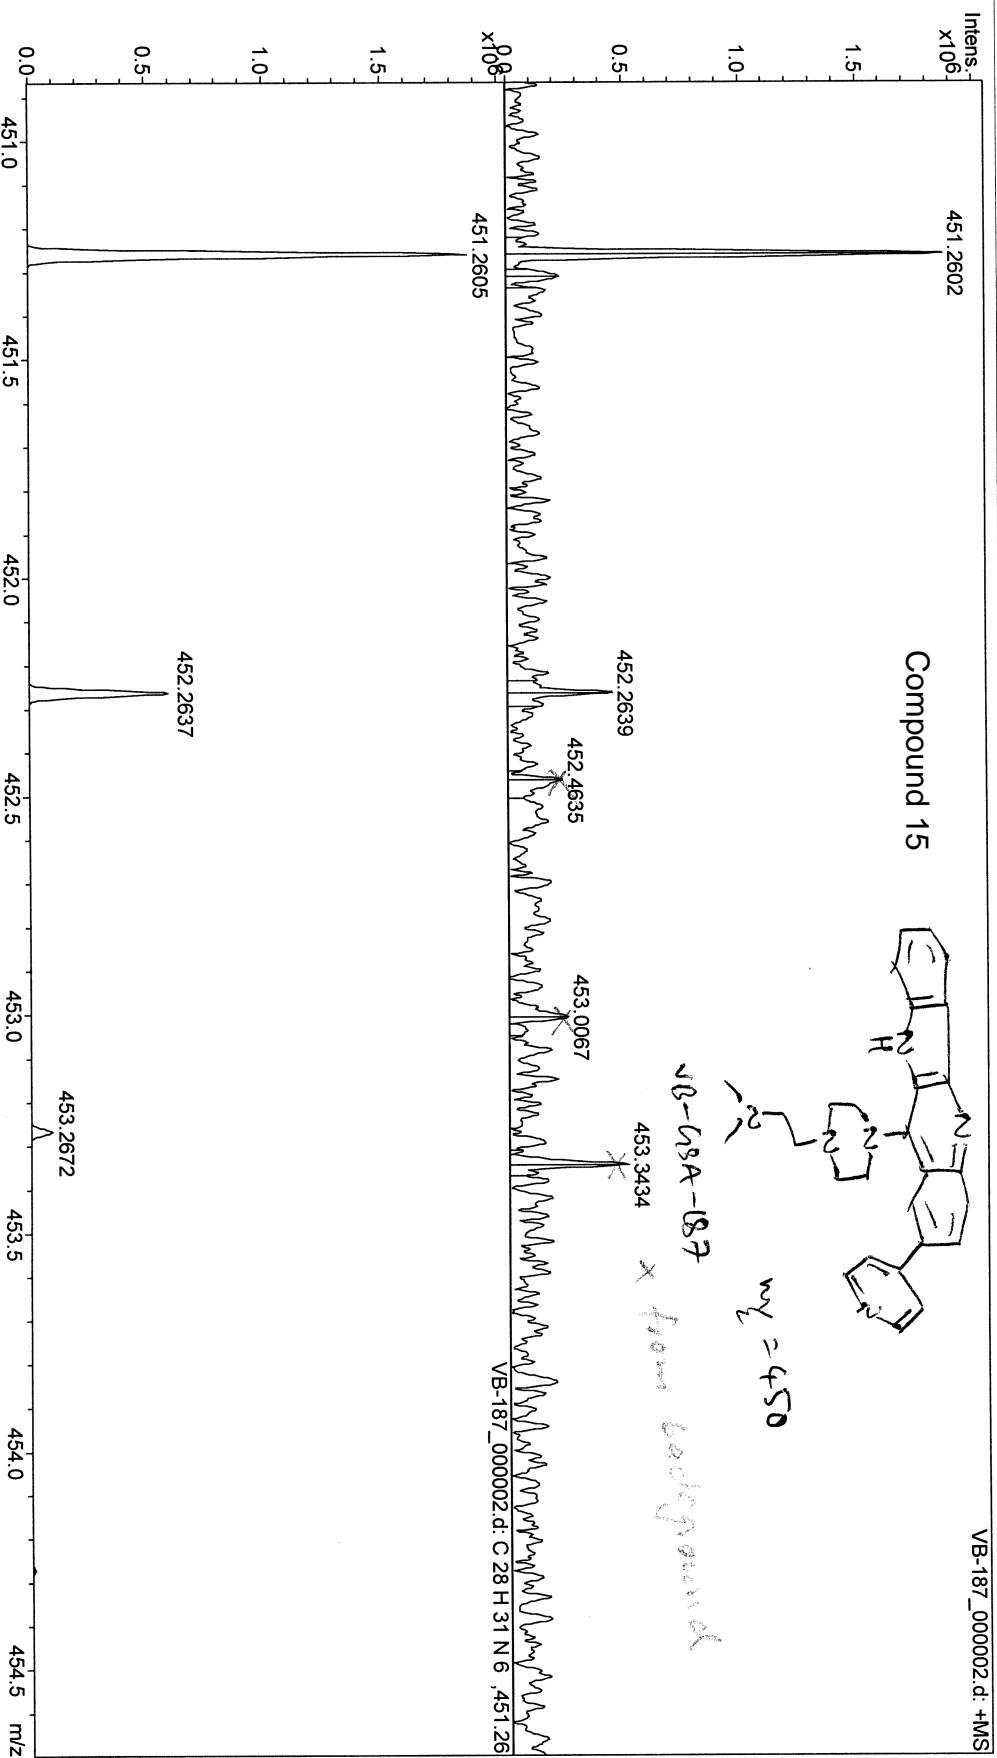

SmartFormula Manually

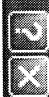

Min

C<sub>16</sub>

Generate

Max

C<sub>16</sub>-n

Help

Note: for m < 2000 the elements C, H, N, and O are considered implicitly.

Measured m/z 451.2602 Tolerance 2 mDa Charge 1

| # | Mol. Formula                                                  | m/z      | err [mDa] | err [ppm] | mean/err [ppm] | mSigma | Sigma Rank | rdB  | N rule | e <sup>-</sup> |
|---|---------------------------------------------------------------|----------|-----------|-----------|----------------|--------|------------|------|--------|----------------|
| 1 | C <sub>27</sub> H <sub>35</sub> N <sub>2</sub> O <sub>4</sub> | 451.2591 | -1.03     | 2.3       | -2.3           | 40.3   | 1          | 11.5 | ok     | even           |
| 2 | C <sub>28</sub> H <sub>31</sub> N <sub>5</sub>                | 451.2605 | 0.31      | 0.7       | 0.7            | 50.3   | 2          | 16.5 | ok     | even           |

Compound 15

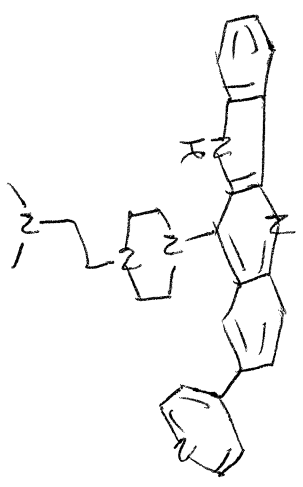

- Automatically locate monoisotopic peak Maximum number of formulas 500
- Check rings plus double bonds Minimum -0.5 Maximum 40
- Electron configuration even
- Filter H/C element ratio Minimum H/C 0 Maximum H/C 3
- Estimate carbon number  Generate immediately

Show Pattern

Compound 16

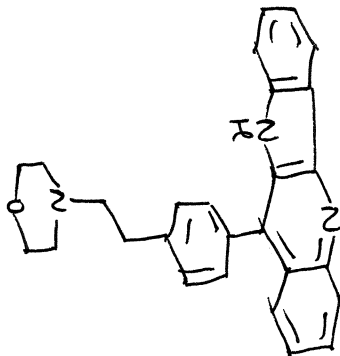

VB-GSA-0218

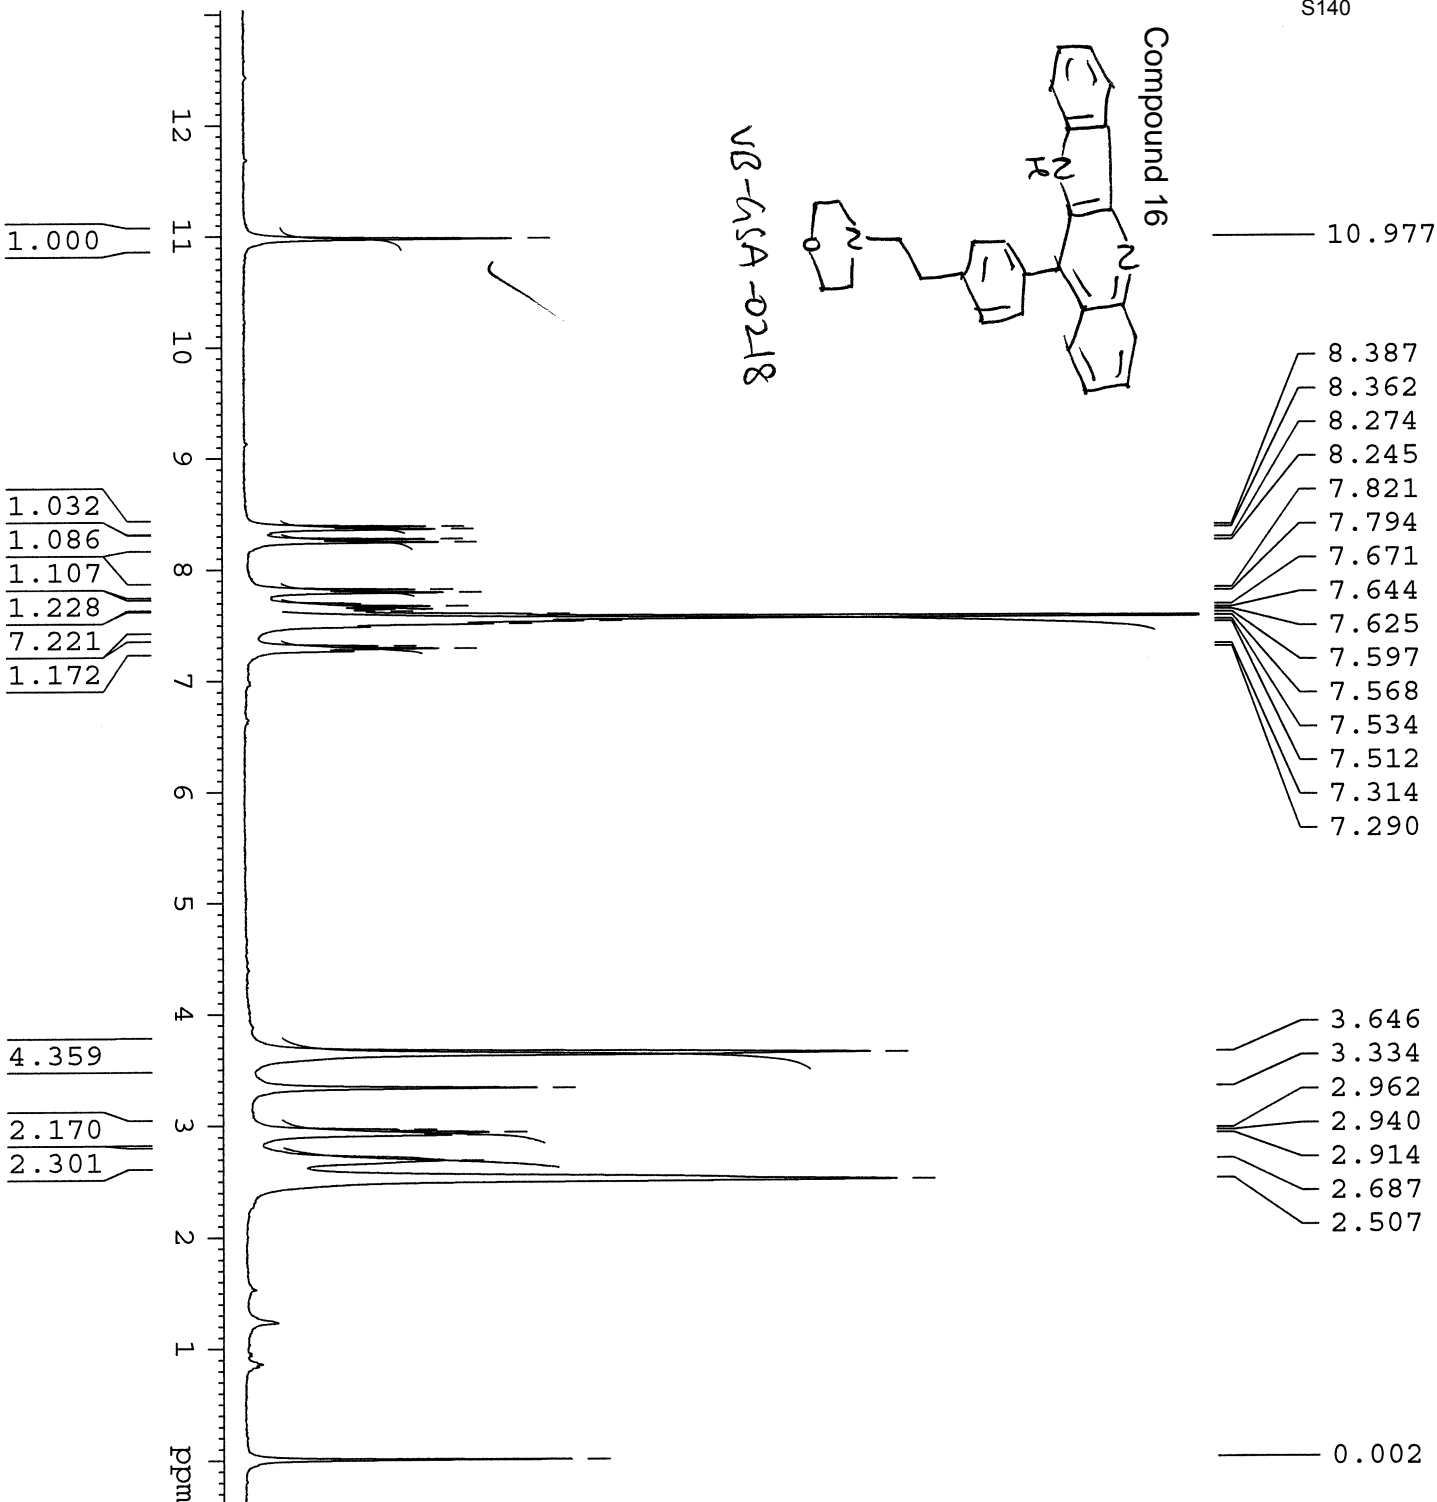

Current Data Parameters  
 NAME VB-GSA-0218  
 EXPNO 4  
 PROCNO 1

F2 - Acquisition Parameters  
 Date\_ 20091222  
 Time 15.56

INSTRUM spect  
 PROBHD 5 mm QNP 1H/1  
 PULPROG zg30  
 TD 65536  
 SOLVENT CDCl3  
 NS 128  
 DS 2

SWH 6172.839 Hz  
 FIDRES 0.094190 Hz  
 AQ 5.3084660 sec  
 RG 512  
 DW 81.000 usec  
 DE 6.00 usec  
 TE 300.0 K  
 D1 1.00000000 sec

==== CHANNEL f1 =====  
 NUC1 1H  
 P1 8.50 usec  
 PL1 0.00 dB  
 SFO1 300.1318534 MHz

F2 - Processing parameters  
 SI 32768  
 SF 300.1300000 MHz  
 MDW EM  
 SSB 0  
 LB 0.30 Hz  
 GB 0  
 PC 1.00

- 141.525
- 132.440
- 131.266
- 131.035
- 130.470
- 130.272
- 130.092
- 126.745
- 126.165
- 125.935
- 125.735
- 125.237
- 122.156
- 122.021
- 120.309
- 112.784

Compound 16

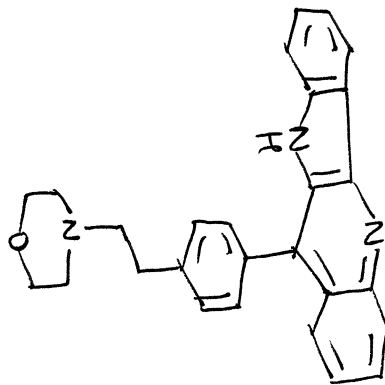

VB-GSA-0218

- 67.064
- 60.805
- 54.168
- 41.242
- 40.964
- 40.685
- 40.407
- 40.129
- 39.851
- 39.573
- 33.084

0.966

Current Data Parameters  
 NAME VB-GSA-0218  
 EXPNO 5  
 PROCNO 1

F2 - Acquisition Parameters

Date\_ 20091223  
 Time\_ 9.16  
 INSTRUM spect  
 PROBHD 5 mm QNP 1H/1  
 PULPROG zgpg30  
 TD 65536  
 SOLVENT CDCl3  
 NS 16000  
 DS 4  
 SWH 17985.611 Hz  
 FIDRES 0.274439 Hz  
 AQ 1.8219508 sec  
 RG 2048  
 DW 27.800 usec  
 DE 6.00 usec  
 TE 300.0 K  
 D1 2.00000000 sec  
 d11 0.03000000 sec  
 d12 0.00002000 sec

==== CHANNEL F1 =====  
 NUC1 13C  
 P1 6.00 usec  
 PL1 2.00 dB  
 SFO1 75.4752653 MHz

==== CHANNEL F2 =====  
 CPDPRG2 waltz16  
 NUC2 1H  
 PCPD2 80.00 usec  
 PL2 0.00 dB  
 PL12 19.47 dB  
 PL13 19.00 dB  
 SFO2 300.1312005 MHz

F2 - Processing parameters  
 SI 32768  
 SF 75.4677190 MHz  
 WDM EM  
 SSB 0  
 LB 1.00 Hz  
 GB 0  
 PC 1.00

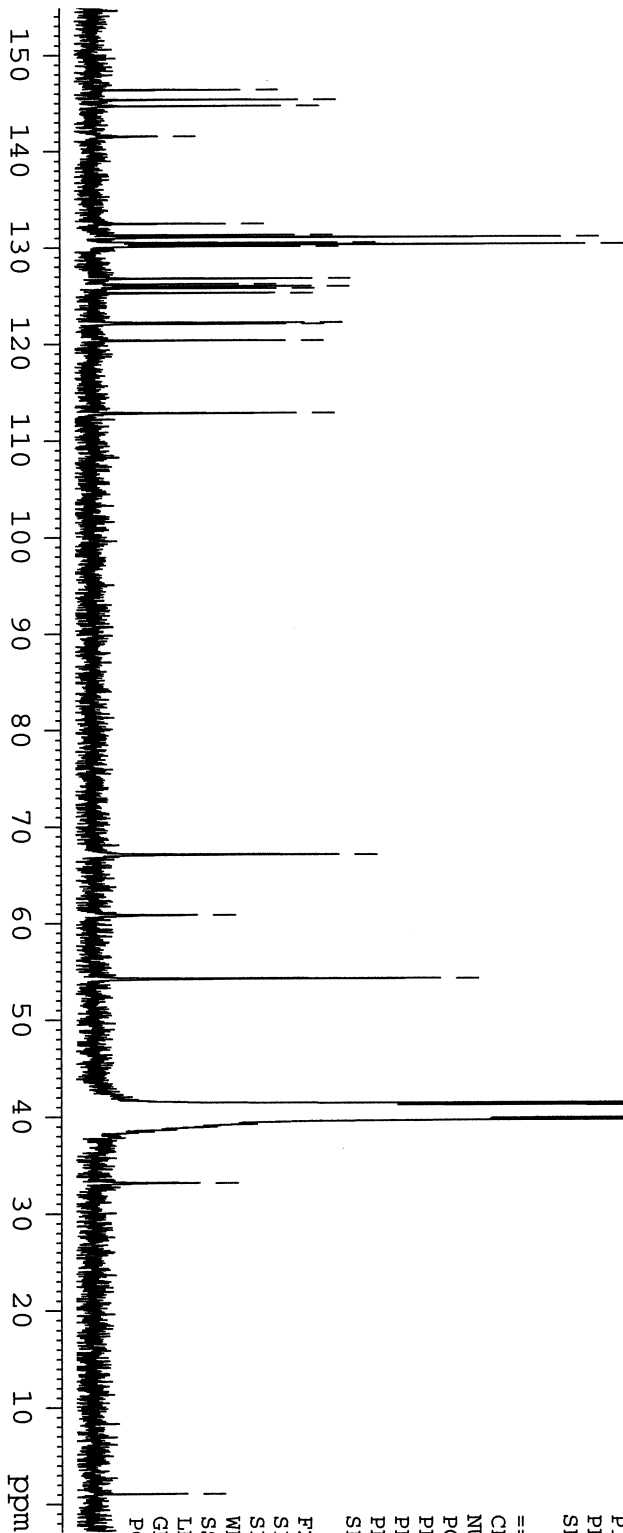

run w/ acid

S142

```

=====
Injection Date   : 12/21/2009 5:11:44 PM
Sample Name     : VB0218
Acq. Operator   : Karen
Acq. Instrument : Instrument 1
Method          : C:\HPCHEM\1\METHODS\LC_MS.M
Last changed    : 12/21/2009 5:06:35 PM by Karen
                  (modified after loading)
  
```

```

Location : Vial 6
Inj       : 1
Inj Volume : 0.2 µl
  
```

Zorbax SB ODS,45:55:0.25; MeOH/water/formicA, POS, 300-500; frag 70; 25C, cap volt 2500, gas temp 350; drying gas 10

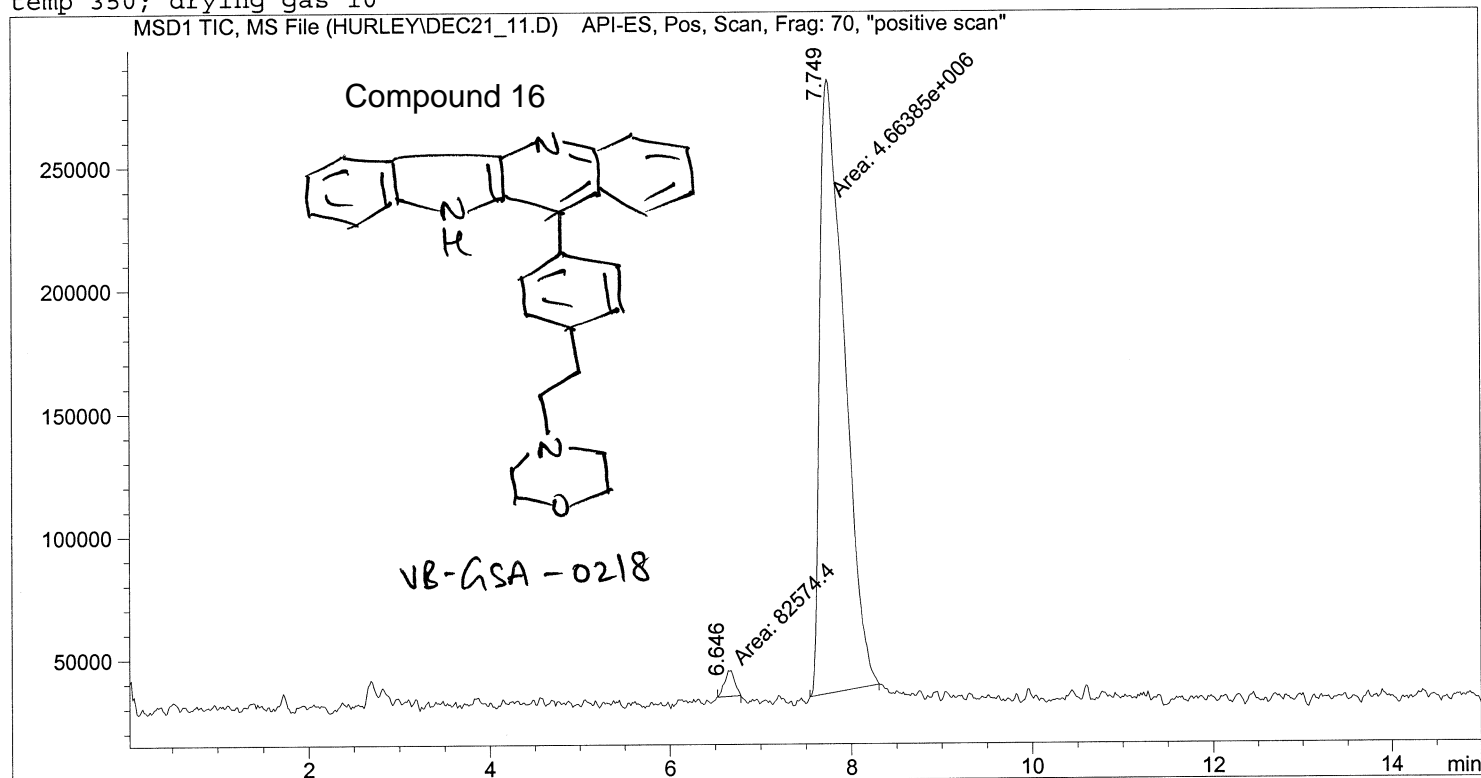

```

=====
Area Percent Report
=====
  
```

```

Sorted By      : Signal
Multiplier     : 1.0000
Dilution       : 1.0000
Use Multiplier & Dilution Factor with ISTDs
  
```

Signal 1: MSD1 TIC, MS File

| Peak # | RetTime [min] | Type | Width [min] | Area      | Height    | Area %    |
|--------|---------------|------|-------------|-----------|-----------|-----------|
| 1      | 6.646         | MM   | 0.1278      | 8.25744e4 | 1.07671e4 | 1.7397    |
| 2      | 7.749         | MM   | 0.3111      | 4.66384e6 | 2.49868e5 | 98.2603 ✓ |

Totals : 4.74642e6 2.60635e5

```

=====
*** End of Report ***
  
```

=====  
Injection Date : 12/21/2009 5:11:44 PM  
Sample Name : VB0218  
Acq. Operator : Karen  
Acq. Instrument : Instrument 1  
Method : C:\HPCHEM\1\METHODS\LC\_MS.M  
Last changed : 12/21/2009 5:06:35 PM by Karen  
(modified after loading)

Location : Vial 6  
Inj : 1  
Inj Volume : 0.2 µl

Zorbax SB ODS,45:55:0.25; MeOH/water/formicA, POS, 300-500; frag 70; 25C, cap volt 2500,  
gas temp 350; drying gas 10

Current Chromatogram(s)

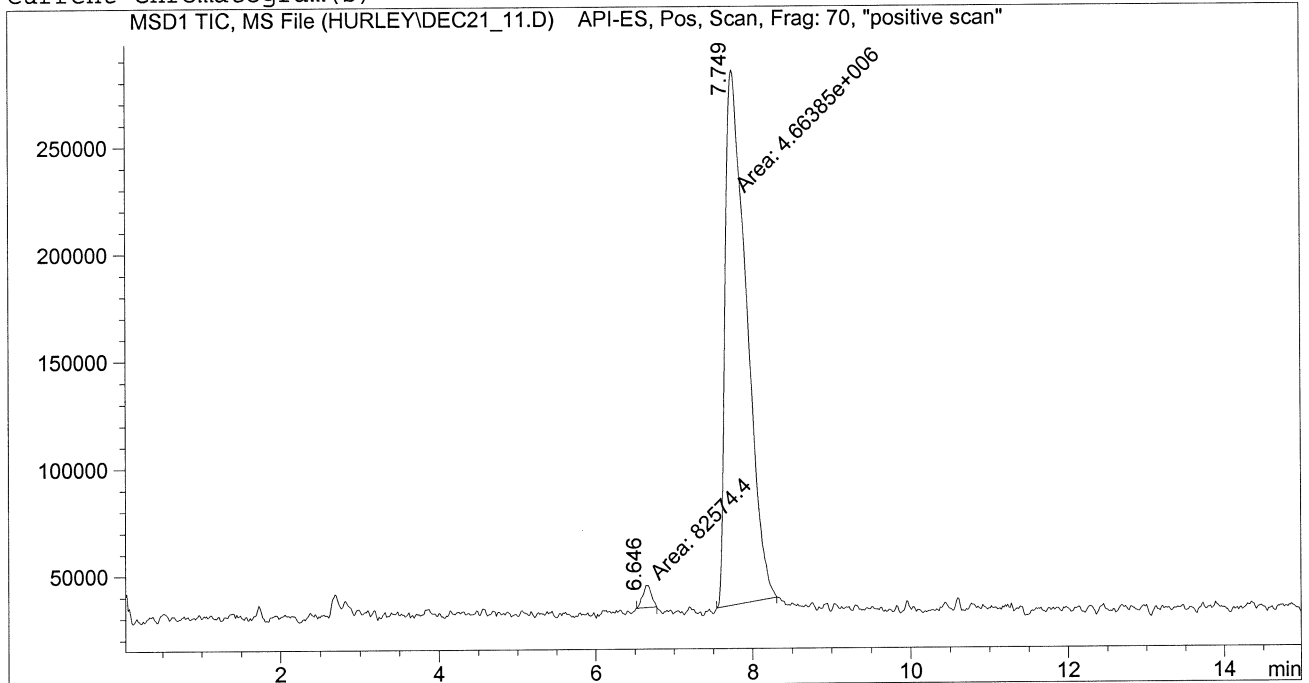

Apex Mass Spectrum of Peak 7.749 of DEC21 11.D

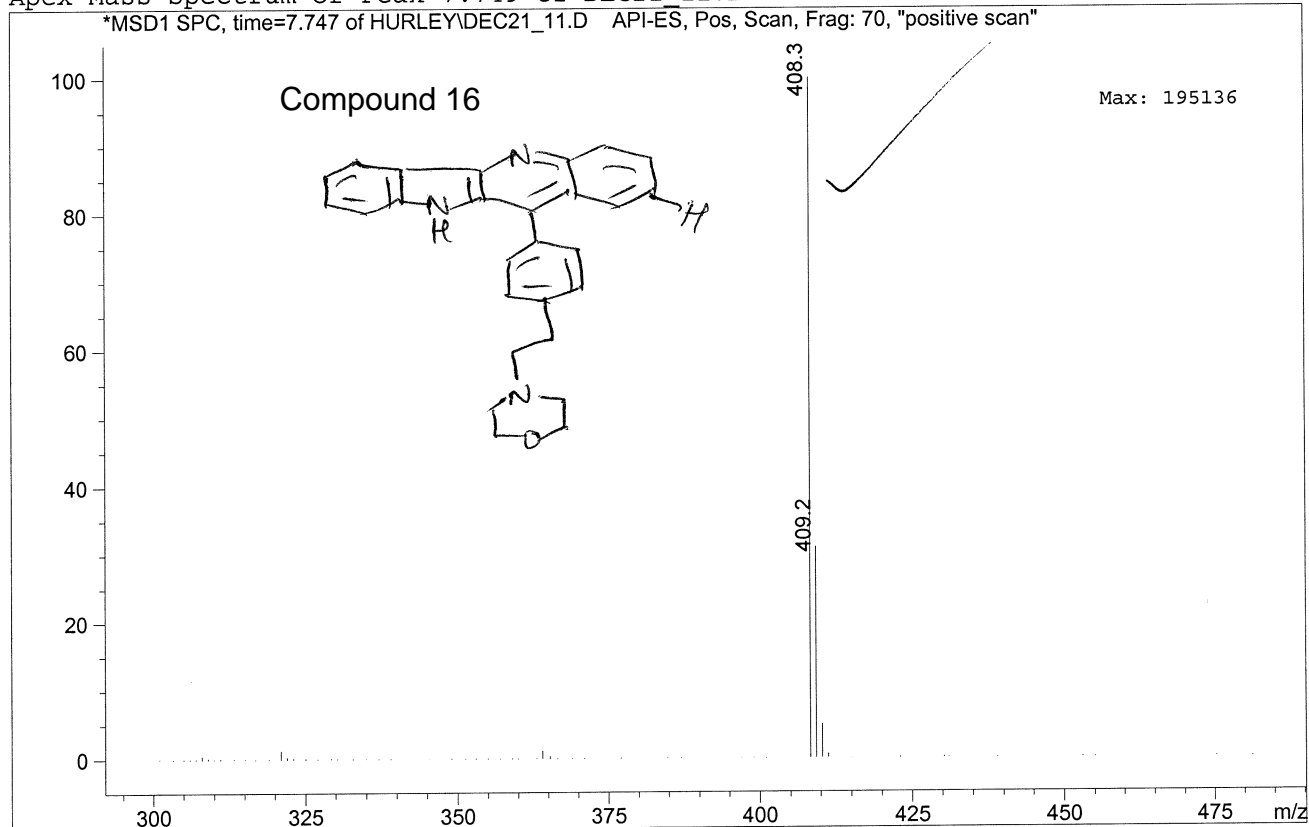

E:\MSLab LCQ\VB-GSA-0218  
Venkat B., ACN:H2O 1:1.0.1%FA

12/22/2009 11:52:18 AM

VB-GSA-0218

VB-GSA-0218 #38-41 RT: 1.11-1.18 AV: 4 NL: 3.32E6  
T: + p Full ms [100.00-1500.00]

204.7 [M+2H]<sup>2+</sup>

Compound 16

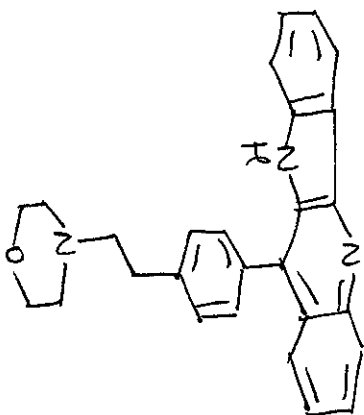

VB-GSA-0218

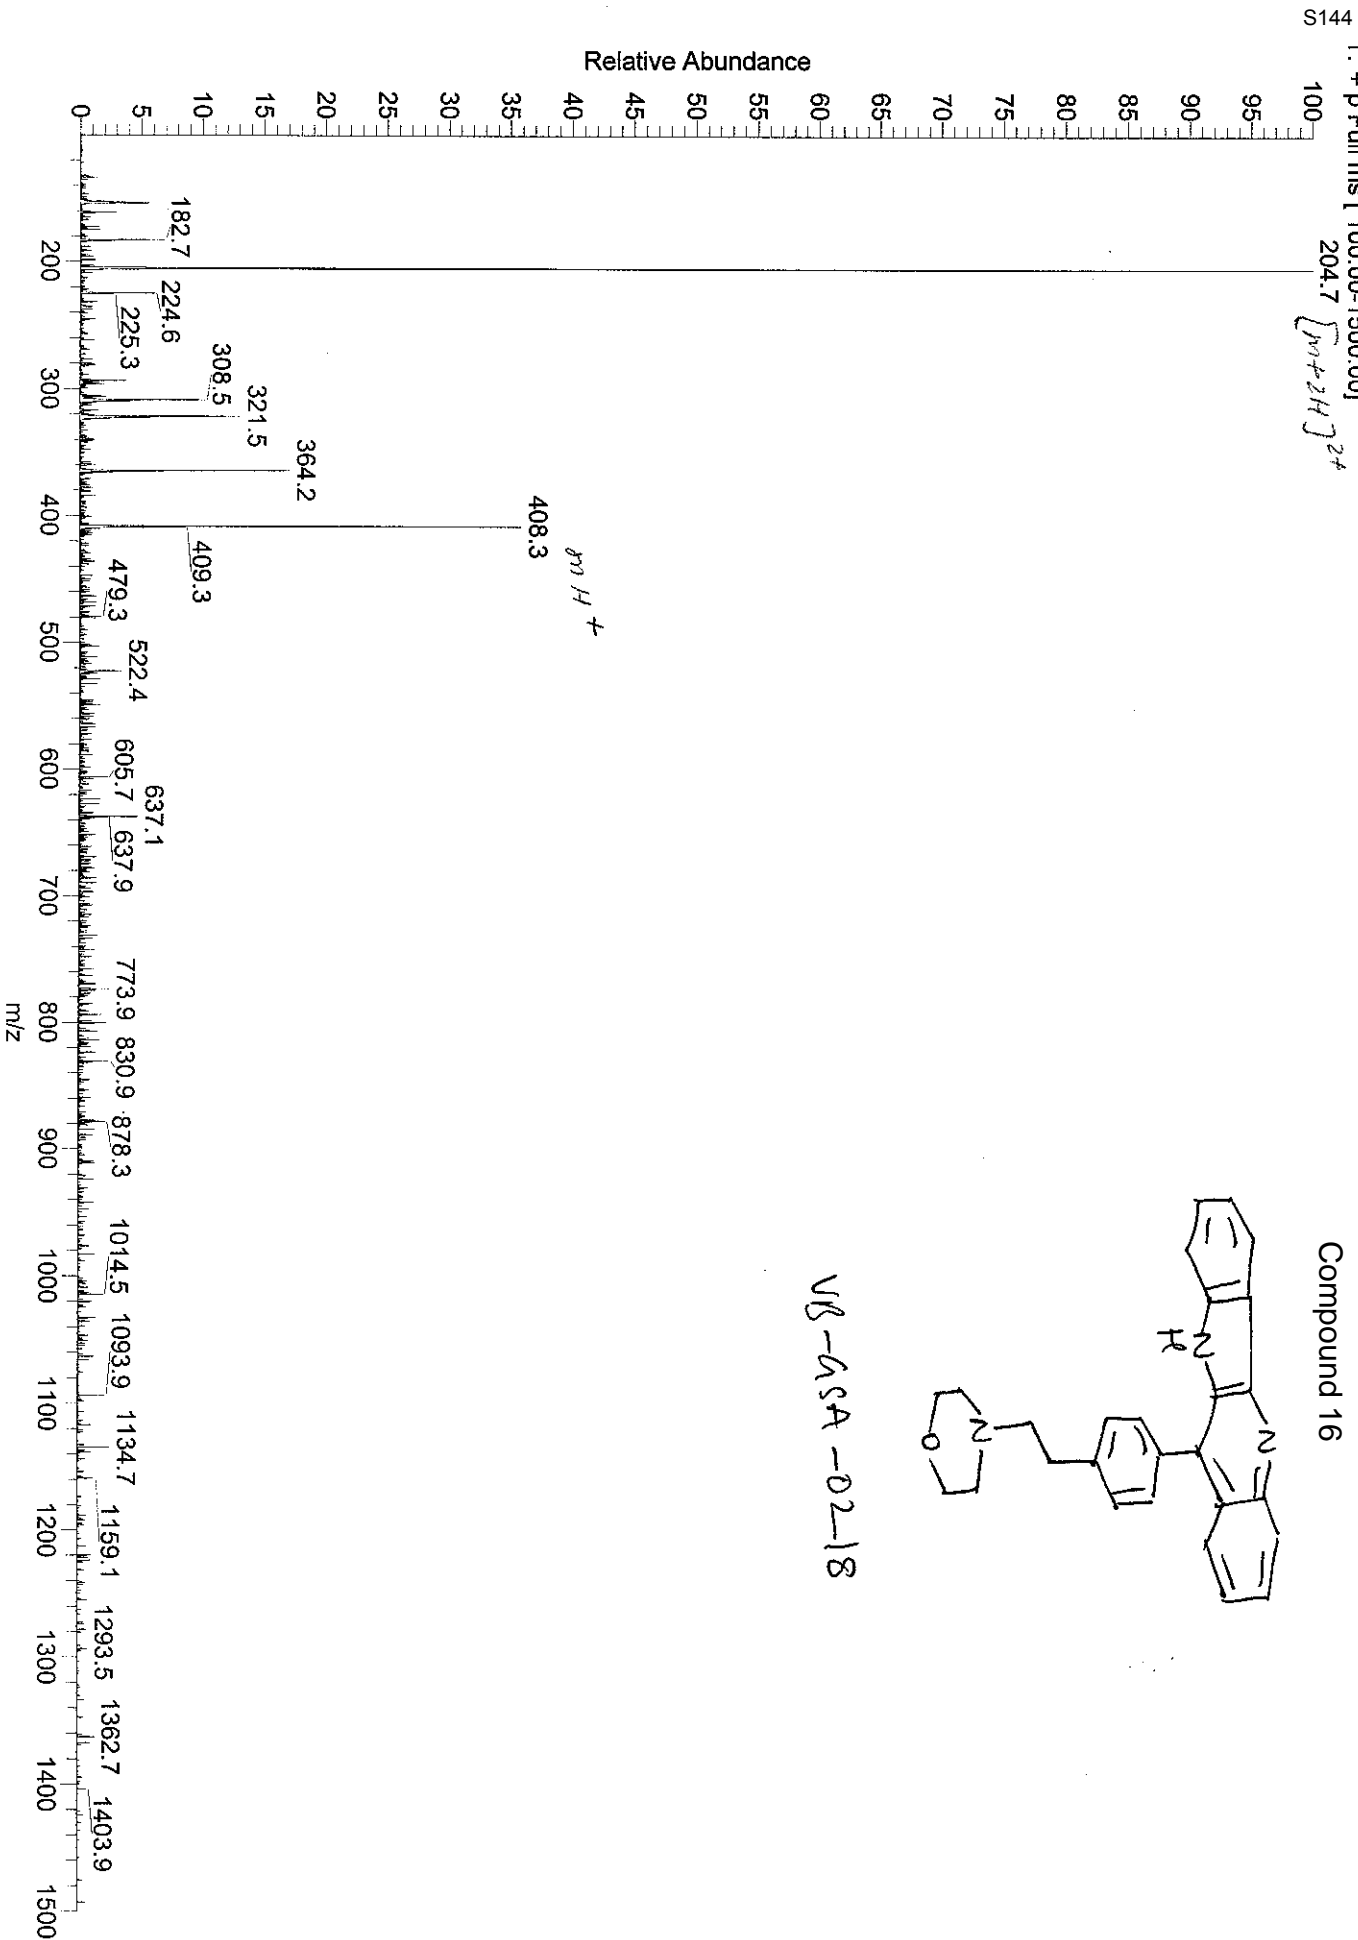



VB-GSA-0218 #38-41 RT: 1.11-1.18 AV: 4 NL: 3.32E6  
T: + p Full ms [100.00-1500.00]

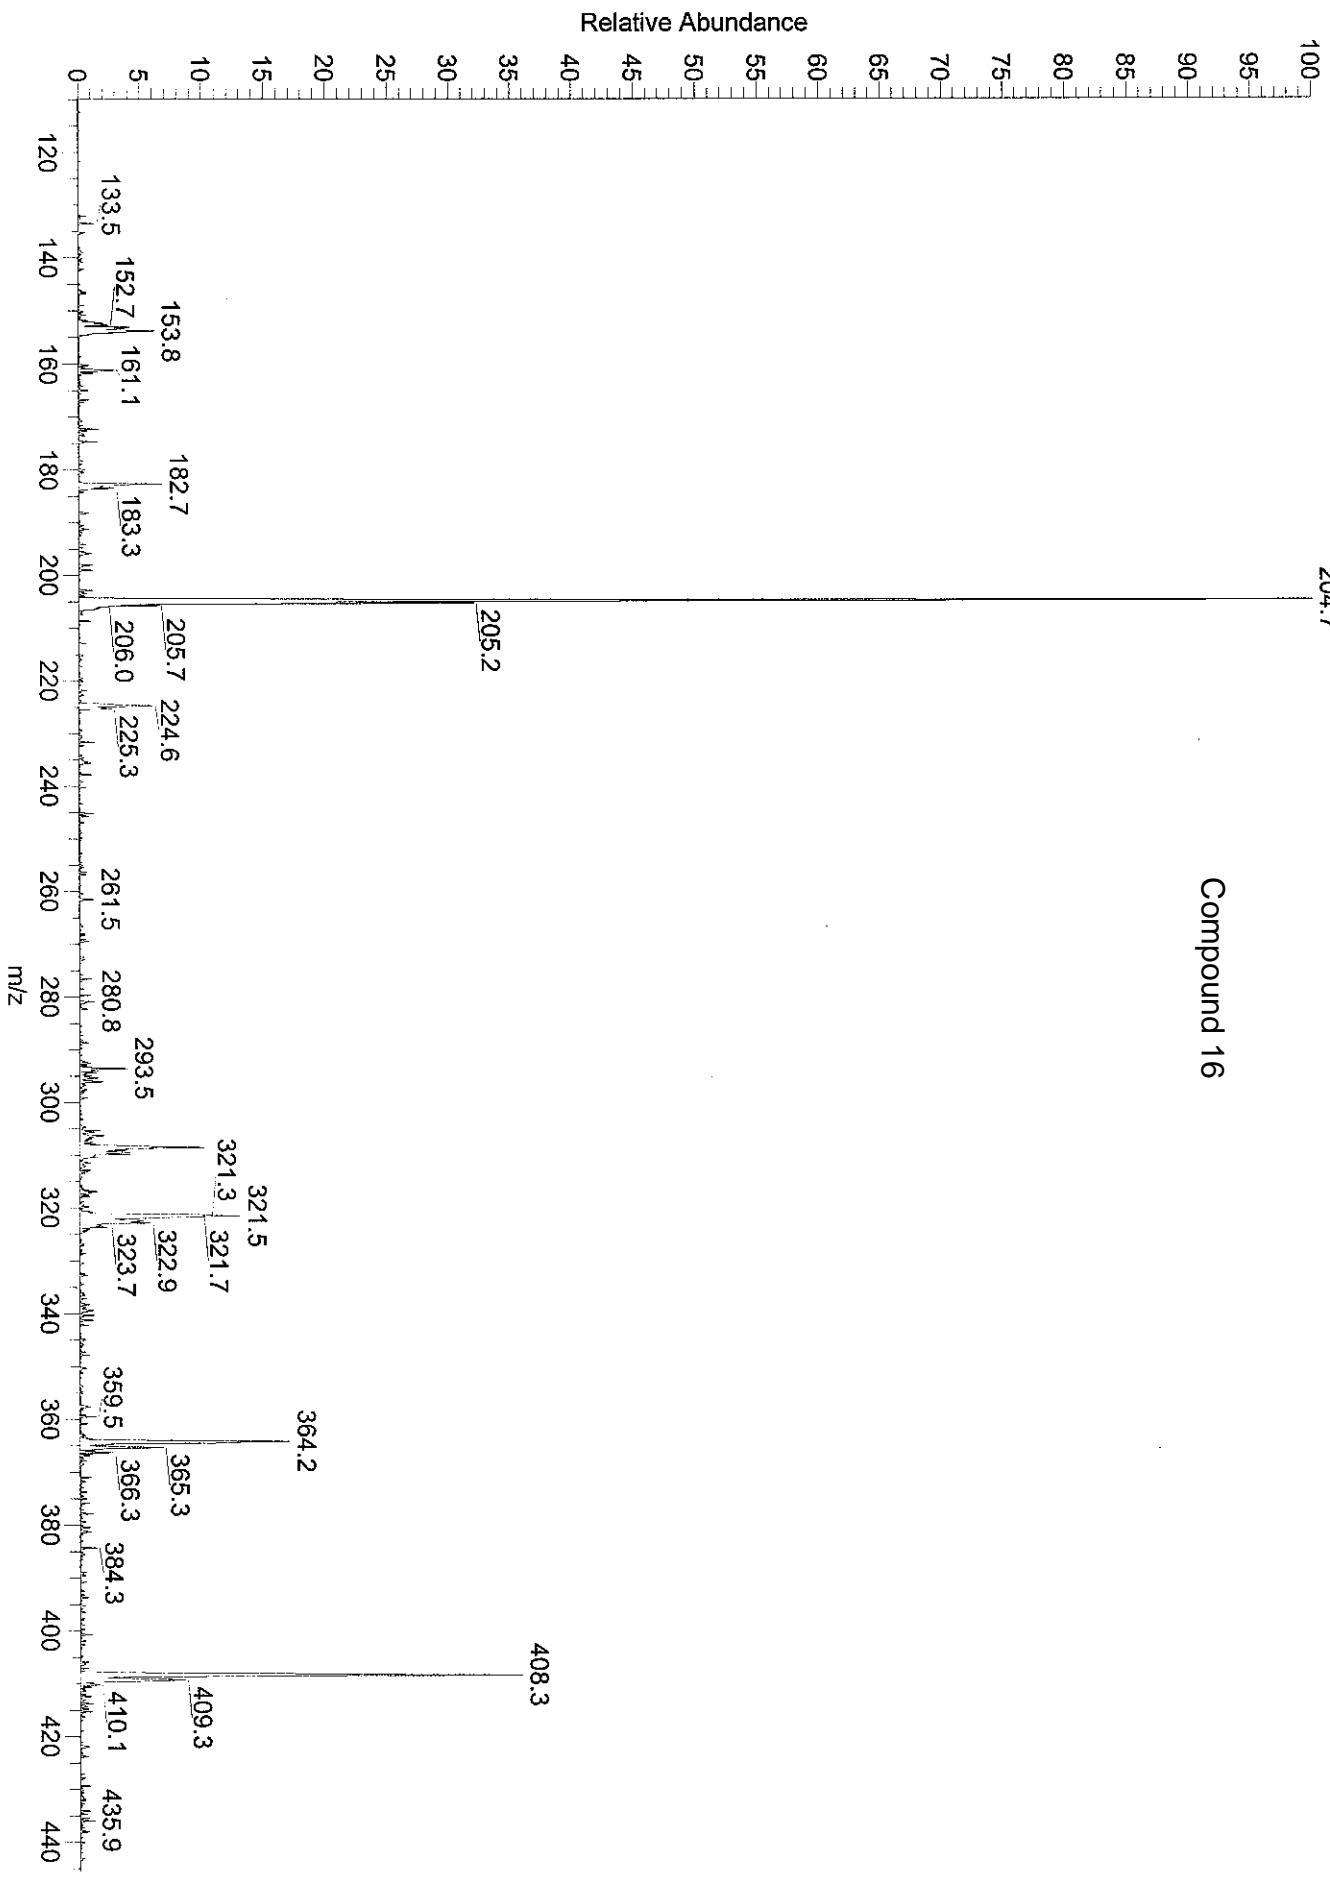

S146

VB-GSA-0218 #32-35 RT: 0.93-1.02 AV: 4 NL: 3.66E5  
T: + p Full ms2 408.00@40.00 [110.00-1500.00]

Compound 16

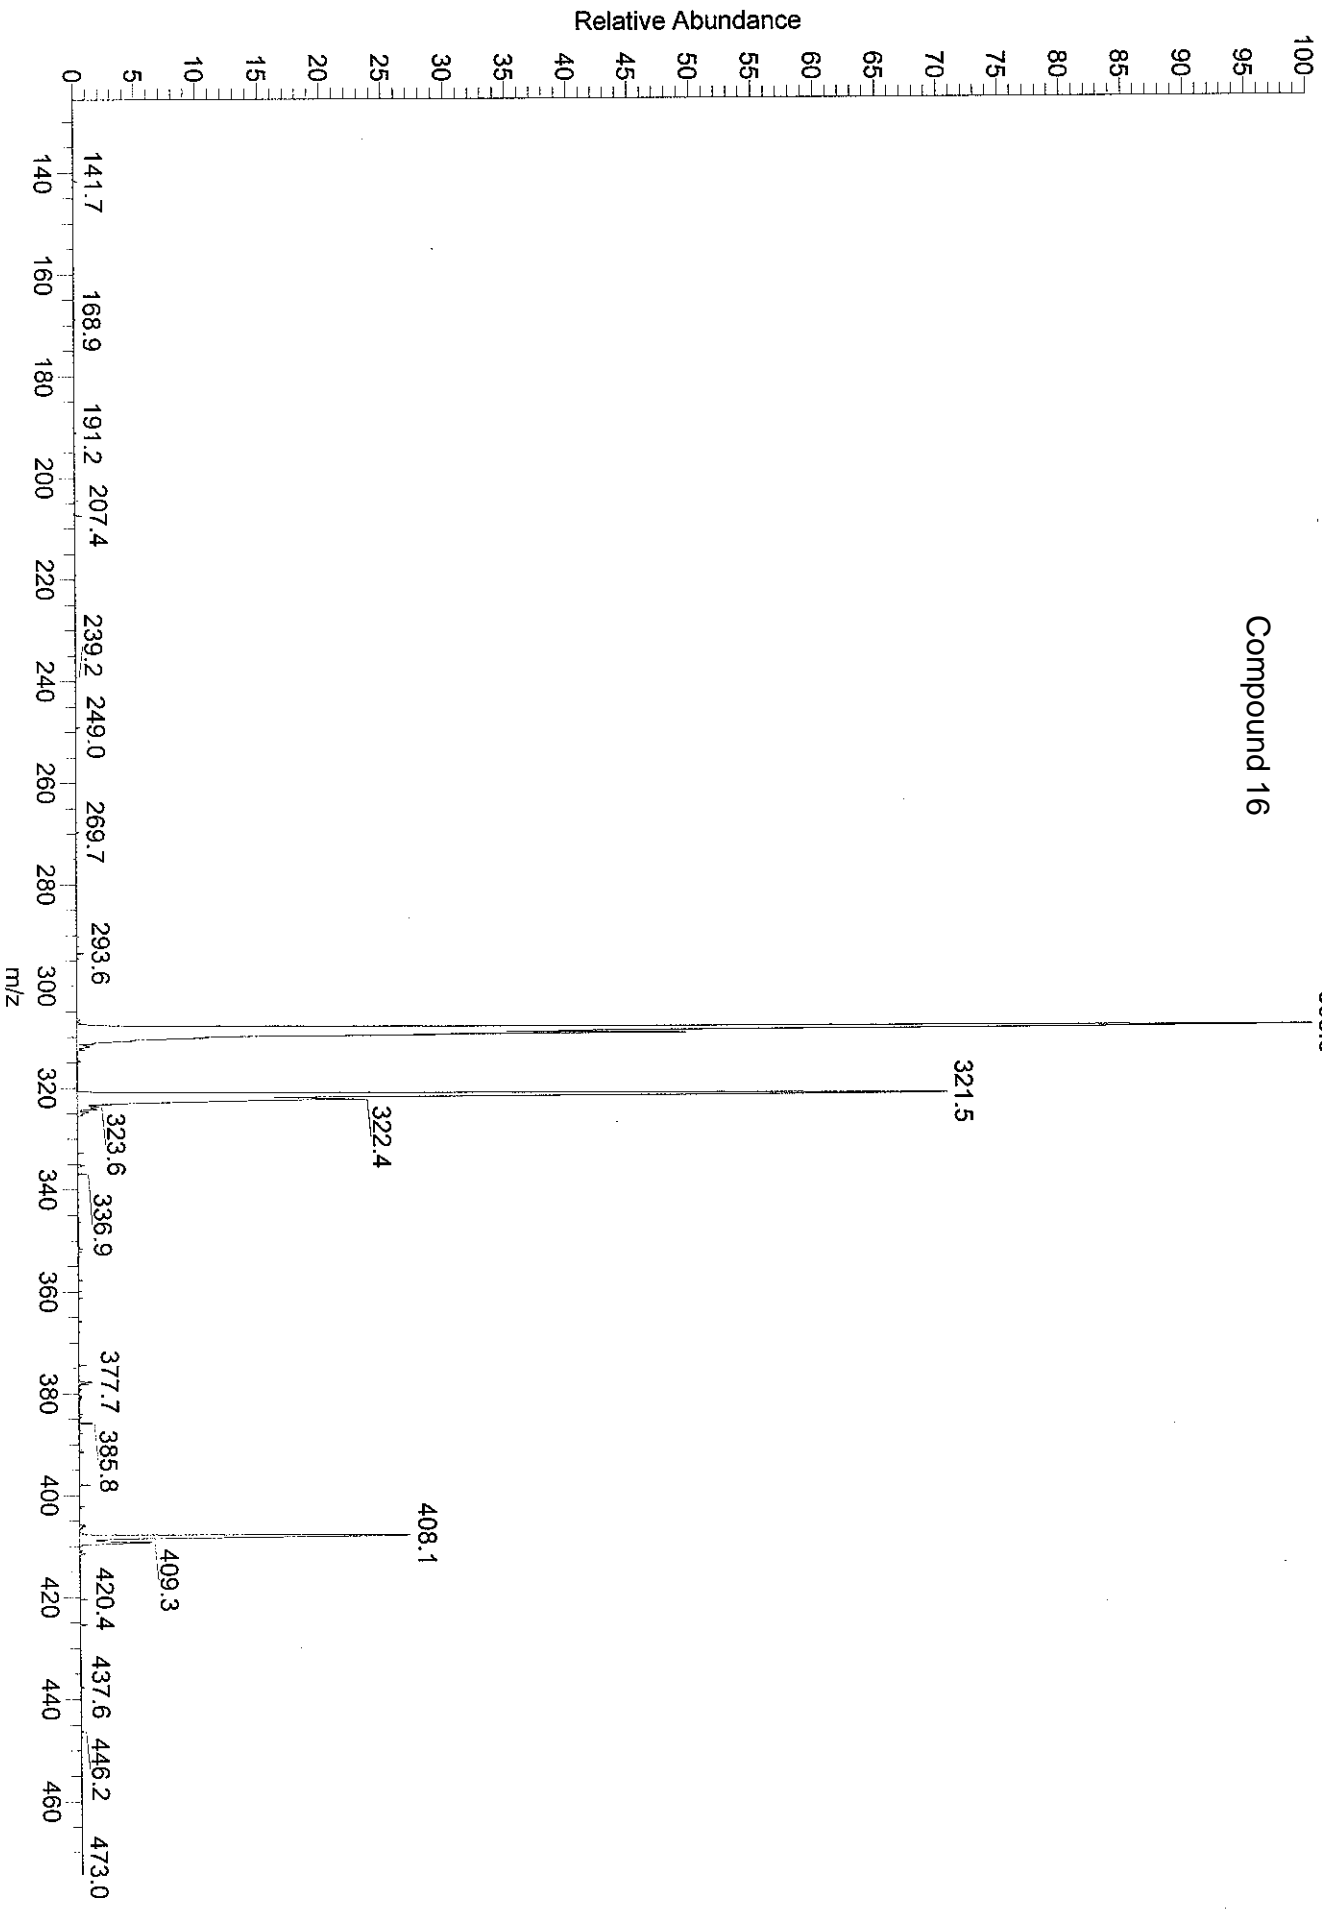

# Generic Display Report

## Analysis Info

Analysis Name D:\DATA\Facility\_Dec\_09\VB-GSA-0218\_000003.d  
Method ESL\_101506  
Sample Name VB-GSA-0218  
Comment Venkat B., ACN:H2O 1:1:0.1%FA

Acquisition Date

12/22/2009 1:44:30 PM

Operator  
Instrument

apex-Qe

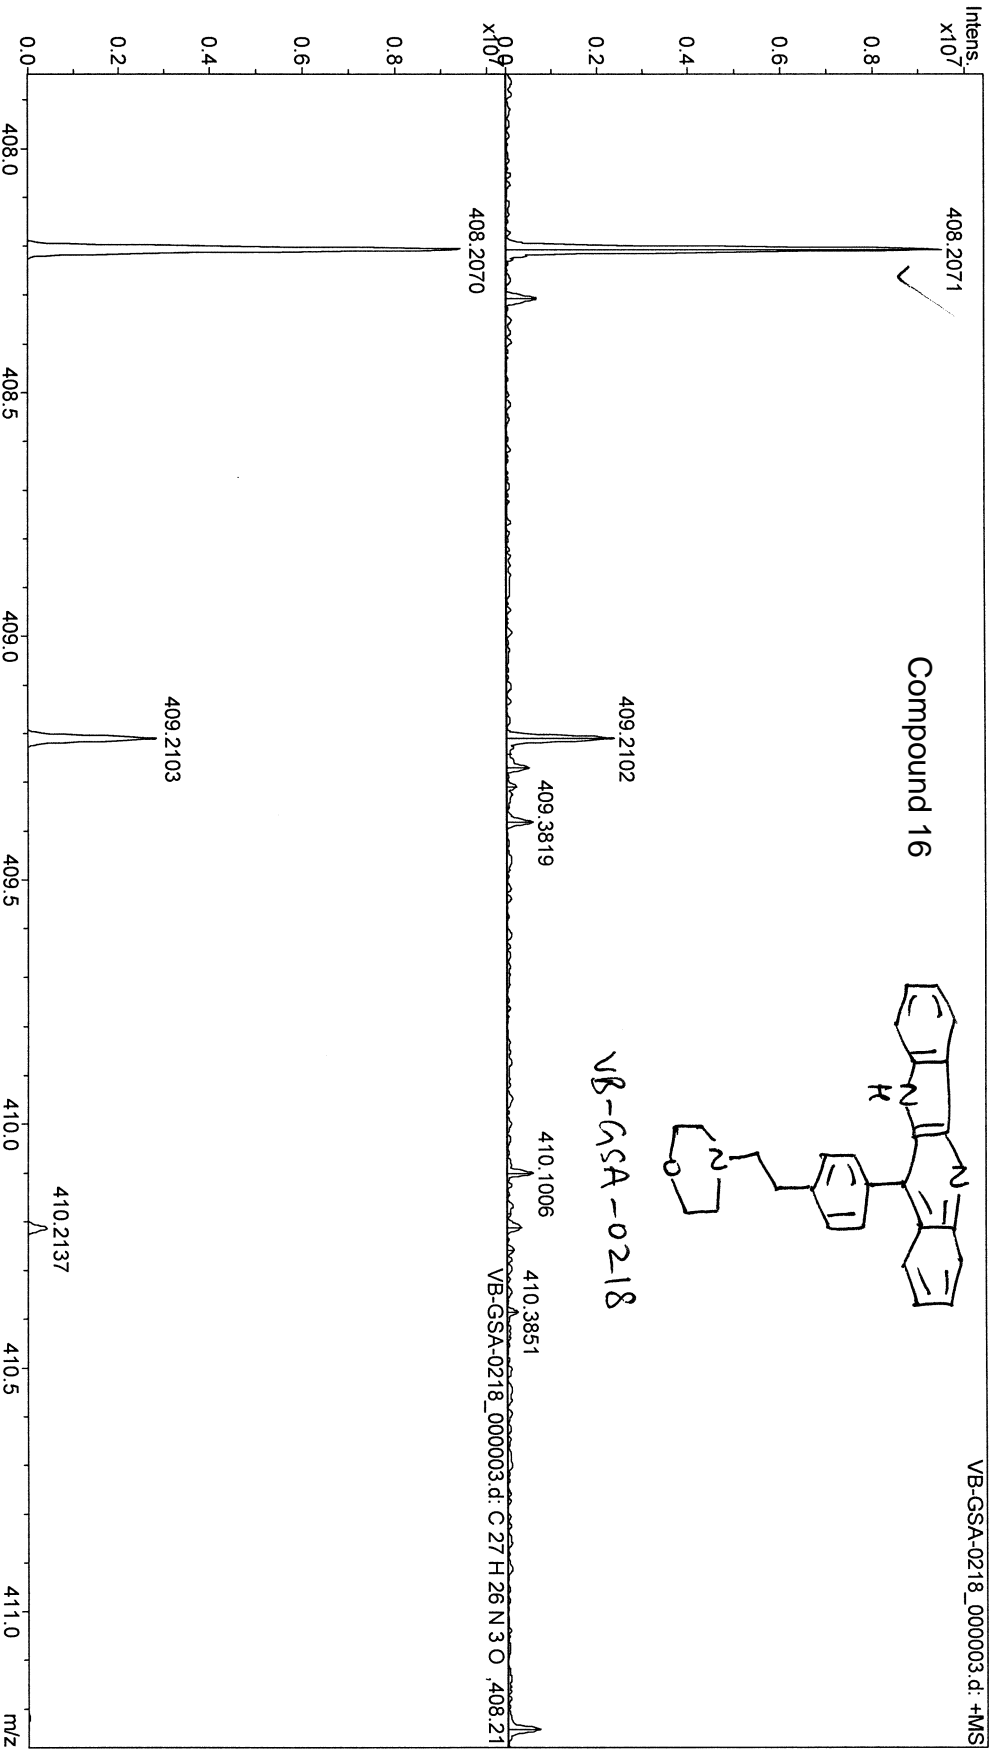

## SmartFormula Manually

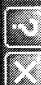Min  
C<sub>16</sub>

Generate

Max

C<sub>16</sub>-n

Help

Note: for m &lt; 2000 the elements C, H, N, and O are considered implicitly.

Measured m/z 408:2071 Tolerance 2 mDa Charge 1

| # | Mol. Formula                                     | m/z      | err [mDa] | err [ppm] | err [ppm] | mean err [ppm] | m/sigma | Sigma Rank | rdp  | N rule | e <sup>-</sup> |
|---|--------------------------------------------------|----------|-----------|-----------|-----------|----------------|---------|------------|------|--------|----------------|
| 1 | C <sub>27</sub> H <sub>26</sub> N <sub>3</sub> O | 408:2070 | -0.05     | 0.1       | -0.1      | 0.1            | 27.0    | 1          | 16.5 | ok     | even           |

Compound 16

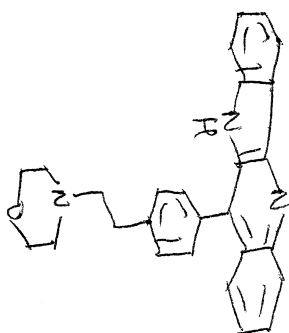
 Automatically locate monoisotopic peak
 Maximum number of formulas 500
 Check rings plus double bonds
 Minimum -0.5    Maximum 40

 Electron configuration
 even
 Filter H/C element ratio
 Minimum H/C 0    Maximum H/C 3
 Estimate carbon number
  Generate immediately

Show Pattern
